# Supplementary material for: Molecular Characterization of the Response to Conventional Chemotherapeutics in Pro-B-ALL Cell Lines in Terms of Tumor Relapse
Source: MDPI journal article supplement (doi:10.3390/genes13071240), 2022-07-14
Supplement: s1 [file s1]

# Supplementary File S1

## Molecular Characterization of the Response to Conventional Chemotherapeutics in Pro-B-ALL Cell Lines in Terms of Tumor Relapse

Yvonne Saara Gladbach <sup>1,2,3,†</sup>, Lisa-Madeleine Sklarz <sup>4,†</sup>, Catrin Roolf <sup>4</sup>, Julia Beck <sup>5</sup>, Ekkehard Schütz <sup>5</sup>, Georg Fuellen <sup>1</sup>, Christian Junghanss <sup>4</sup>, Hugo Murua Escobar <sup>4,6</sup> and Mohamed Hamed <sup>1,\*</sup>

### Supplementary Tables

**Supplementary Table S1. Gene Ontology terms related to stress release and metabolism as reported in DAVID.** This list was used to filter out the DEG sets.

| Gene Ontology IDs and terms                                 |
|-------------------------------------------------------------|
| GO:0000302~response to reactive oxygen species              |
| GO:0001101~response to acid chemical                        |
| GO:0001501~skeletal system development                      |
| GO:0001816~cytokine production                              |
| GO:0001817~regulation of cytokine production                |
| GO:0001819~positive regulation of cytokine production       |
| GO:0005975~carbohydrate metabolic process                   |
| GO:0006000~fructose metabolic process                       |
| GO:0006022~aminoglycan metabolic process                    |
| GO:0006029~proteoglycan metabolic process                   |
| GO:0006082~organic acid metabolic process                   |
| GO:0006090~pyruvate metabolic process                       |
| GO:0006140~regulation of nucleotide metabolic process       |
| GO:0006164~purine nucleotide biosynthetic process           |
| GO:0006171~cAMP biosynthetic process                        |
| GO:0006259~DNA metabolic process                            |
| GO:0006575~cellular modified amino acid metabolic process   |
| GO:0006730~one-carbon metabolic process                     |
| GO:0006733~oxidoreduction coenzyme metabolic process        |
| GO:0006757~ATP generation from ADP                          |
| GO:0006760~folic acid-containing compound metabolic process |
| GO:0006793~phosphorus metabolic process                     |
| GO:0006796~phosphate-containing compound metabolic process  |

|                                                                     |
|---------------------------------------------------------------------|
| GO:0006809~nitric oxide biosynthetic process                        |
| GO:0006950~response to stress                                       |
| GO:0006974~cellular response to DNA damage stimulus                 |
| GO:0006979~response to oxidative stress                             |
| GO:0008652~cellular amino acid biosynthetic process                 |
| GO:0009124~nucleoside monophosphate biosynthetic process            |
| GO:0009127~purine nucleoside monophosphate biosynthetic process     |
| GO:0009132~nucleoside diphosphate metabolic process                 |
| GO:0009135~purine nucleoside diphosphate metabolic process          |
| GO:0009142~nucleoside triphosphate biosynthetic process             |
| GO:0009145~purine nucleoside triphosphate biosynthetic process      |
| GO:0009152~purine ribonucleotide biosynthetic process               |
| GO:0009156~ribonucleoside monophosphate biosynthetic process        |
| GO:0009163~nucleoside biosynthetic process                          |
| GO:0009165~nucleotide biosynthetic process                          |
| GO:0009168~purine ribonucleoside monophosphate biosynthetic process |
| GO:0009179~purine ribonucleoside diphosphate metabolic process      |
| GO:0009185~ribonucleoside diphosphate metabolic process             |
| GO:0009190~cyclic nucleotide biosynthetic process                   |
| GO:0009260~ribonucleotide biosynthetic process                      |
| GO:0009605~response to external stimulus                            |
| GO:0009607~response to biotic stimulus                              |
| GO:0009628~response to abiotic stimulus                             |
| GO:0009719~response to endogenous stimulus                          |
| GO:0009743~response to carbohydrate                                 |
| GO:0009891~positive regulation of biosynthetic process              |
| GO:0009892~negative regulation of metabolic process                 |
| GO:0009893~positive regulation of metabolic process                 |
| GO:0009991~response to extracellular stimulus                       |
| GO:0010033~response to organic substance                            |
| GO:0010035~response to inorganic substance                          |
| GO:0010243~response to organonitrogen compound                      |
| GO:0010562~positive regulation of phosphorus metabolic process      |
| GO:0010563~negative regulation of phosphorus metabolic process      |
| GO:0010604~positive regulation of macromolecule metabolic process   |
| GO:0010605~negative regulation of macromolecule metabolic process   |
| GO:0014070~response to organic cyclic compound                      |
| GO:0016052~carbohydrate catabolic process                           |
| GO:0016053~organic acid biosynthetic process                        |
| GO:0019220~regulation of phosphate metabolic process                |
| GO:0019222~regulation of metabolic process                          |
| GO:0019362~pyridine nucleotide metabolic process                    |
| GO:0019751~polyol metabolic process                                 |

|                                                                          |
|--------------------------------------------------------------------------|
| GO:0019752~carboxylic acid metabolic process                             |
| GO:0030203~glycosaminoglycan metabolic process                           |
| GO:0030799~regulation of cyclic nucleotide metabolic process             |
| GO:0030801~positive regulation of cyclic nucleotide metabolic process    |
| GO:0030802~regulation of cyclic nucleotide biosynthetic process          |
| GO:0030804~positive regulation of cyclic nucleotide biosynthetic process |
| GO:0030808~regulation of nucleotide biosynthetic process                 |
| GO:0030810~positive regulation of nucleotide biosynthetic process        |
| GO:0030814~regulation of cAMP metabolic process                          |
| GO:0030816~positive regulation of cAMP metabolic process                 |
| GO:0030817~regulation of cAMP biosynthetic process                       |
| GO:0030819~positive regulation of cAMP biosynthetic process              |
| GO:0031098~stress-activated protein kinase signaling cascade             |
| GO:0031323~regulation of cellular metabolic process                      |
| GO:0031324~negative regulation of cellular metabolic process             |
| GO:0031325~positive regulation of cellular metabolic process             |
| GO:0031328~positive regulation of cellular biosynthetic process          |
| GO:0032101~regulation of response to external stimulus                   |
| GO:0032102~negative regulation of response to external stimulus          |
| GO:0032268~regulation of cellular protein metabolic process              |
| GO:0032269~negative regulation of cellular protein metabolic process     |
| GO:0032270~positive regulation of cellular protein metabolic process     |
| GO:0032787~monocarboxylic acid metabolic process                         |
| GO:0032872~regulation of stress-activated MAPK cascade                   |
| GO:0032874~positive regulation of stress-activated MAPK cascade          |
| GO:0033554~cellular response to stress                                   |
| GO:0034097~response to cytokine                                          |
| GO:0034405~response to fluid shear stress                                |
| GO:0034599~cellular response to oxidative stress                         |
| GO:0034614~cellular response to reactive oxygen species                  |
| GO:0035690~cellular response to drug                                     |
| GO:0036293~response to decreased oxygen levels                           |
| GO:0036294~cellular response to decreased oxygen levels                  |
| GO:0042221~response to chemical                                          |
| GO:0042398~cellular modified amino acid biosynthetic process             |
| GO:0042451~purine nucleoside biosynthetic process                        |
| GO:0042455~ribonucleoside biosynthetic process                           |
| GO:0042493~response to drug                                              |
| GO:0042558~pteridine-containing compound metabolic process               |
| GO:0043068~positive regulation of programmed cell death                  |
| GO:0043086~negative regulation of catalytic activity                     |
| GO:0043207~response to external biotic stimulus                          |
| GO:0043436~oxoacid metabolic process                                     |

|                                                                                    |
|------------------------------------------------------------------------------------|
| GO:0044236~multicellular organism metabolic process                                |
| GO:0044262~cellular carbohydrate metabolic process                                 |
| GO:0044281~small molecule metabolic process                                        |
| GO:0044710~single-organism metabolic process                                       |
| GO:0044711~single-organism biosynthetic process                                    |
| GO:0044723~single-organism carbohydrate metabolic process                          |
| GO:0045935~positive regulation of nucleobase-containing compound metabolic process |
| GO:0045936~negative regulation of phosphate metabolic process                      |
| GO:0045937~positive regulation of phosphate metabolic process                      |
| GO:0045978~negative regulation of nucleoside metabolic process                     |
| GO:0045981~positive regulation of nucleotide metabolic process                     |
| GO:0046031~ADP metabolic process                                                   |
| GO:0046033~AMP metabolic process                                                   |
| GO:0046058~cAMP metabolic process                                                  |
| GO:0046129~purine ribonucleoside biosynthetic process                              |
| GO:0046209~nitric oxide metabolic process                                          |
| GO:0046390~ribose phosphate biosynthetic process                                   |
| GO:0046496~nicotinamide nucleotide metabolic process                               |
| GO:0046653~tetrahydrofolate metabolic process                                      |
| GO:0046655~folic acid metabolic process                                            |
| GO:0046939~nucleotide phosphorylation                                              |
| GO:0048519~negative regulation of biological process                               |
| GO:0048583~regulation of response to stimulus                                      |
| GO:0048584~positive regulation of response to stimulus                             |
| GO:0048585~negative regulation of response to stimulus                             |
| GO:0050790~regulation of catalytic activity                                        |
| GO:0050896~response to stimulus                                                    |
| GO:0051052~regulation of DNA metabolic process                                     |
| GO:0051053~negative regulation of DNA metabolic process                            |
| GO:0051054~positive regulation of DNA metabolic process                            |
| GO:0051094~positive regulation of developmental process                            |
| GO:0051129~negative regulation of cellular component organization                  |
| GO:0051173~positive regulation of nitrogen compound metabolic process              |
| GO:0051174~regulation of phosphorus metabolic process                              |
| GO:0051246~regulation of protein metabolic process                                 |
| GO:0051247~positive regulation of protein metabolic process                        |
| GO:0051248~negative regulation of protein metabolic process                        |
| GO:0051403~stress-activated MAPK cascade                                           |
| GO:0051716~cellular response to stimulus                                           |
| GO:0052652~cyclic purine nucleotide metabolic process                              |
| GO:0055114~oxidation-reduction process                                             |
| GO:0060255~regulation of macromolecule metabolic process                           |

|                                                                                     |
|-------------------------------------------------------------------------------------|
| GO:0070302~regulation of stress-activated protein kinase signaling cascade          |
| GO:0070304~positive regulation of stress-activated protein kinase signaling cascade |
| GO:0070482~response to oxygen levels                                                |
| GO:0070887~cellular response to chemical stimulus                                   |
| GO:0071216~cellular response to biotic stimulus                                     |
| GO:0071229~cellular response to acid chemical                                       |
| GO:0071310~cellular response to organic substance                                   |
| GO:0071345~cellular response to cytokine stimulus                                   |
| GO:0071407~cellular response to organic cyclic compound                             |
| GO:0071417~cellular response to organonitrogen compound                             |
| GO:0071453~cellular response to oxygen levels                                       |
| GO:0071495~cellular response to endogenous stimulus                                 |
| GO:0071897~DNA biosynthetic process                                                 |
| GO:0072522~purine-containing compound biosynthetic process                          |
| GO:0072524~pyridine-containing compound metabolic process                           |
| GO:0072593~reactive oxygen species metabolic process                                |
| GO:0080090~regulation of primary metabolic process                                  |
| GO:0080134~regulation of response to stress                                         |
| GO:0080135~regulation of cellular response to stress                                |
| GO:0090407~organophosphate biosynthetic process                                     |
| GO:1900371~regulation of purine nucleotide biosynthetic process                     |
| GO:1900373~positive regulation of purine nucleotide biosynthetic process            |
| GO:1900542~regulation of purine nucleotide metabolic process                        |
| GO:1900544~positive regulation of purine nucleotide metabolic process               |
| GO:1901031~regulation of response to reactive oxygen species                        |
| GO:1901135~carbohydrate derivative metabolic process                                |
| GO:1901136~carbohydrate derivative catabolic process                                |
| GO:1901137~carbohydrate derivative biosynthetic process                             |
| GO:1901293~nucleoside phosphate biosynthetic process                                |
| GO:1901564~organonitrogen compound metabolic process                                |
| GO:1901565~organonitrogen compound catabolic process                                |
| GO:1901566~organonitrogen compound biosynthetic process                             |
| GO:1901615~organic hydroxy compound metabolic process                               |
| GO:1901617~organic hydroxy compound biosynthetic process                            |
| GO:1901698~response to nitrogen compound                                            |
| GO:1901700~response to oxygen-containing compound                                   |
| GO:1901701~cellular response to oxygen-containing compound                          |
| GO:1902882~regulation of response to oxidative stress                               |
| GO:1903409~reactive oxygen species biosynthetic process                             |
| GO:1903510~mucopolysaccharide metabolic process                                     |
| GO:1903579~negative regulation of ATP metabolic process                             |
| GO:2001057~reactive nitrogen species metabolic process                              |

**GO:2001169~regulation of ATP biosynthetic process**

**GO:2001171~positive regulation of ATP biosynthetic process**

**Supplementary Table S2. Number of DEGs before and after filtration for drug/stress release and metabolism.** The DEGs are based on a p-value of  $p < 0.05$ , DEGs are calculated for the two pro-B-ALL cell lines after exposition to AraC and Dexa.

| Agent                    | RS4;11 | SEM  |
|--------------------------|--------|------|
| <u>before filtration</u> |        |      |
| AraC                     | 776    | 927  |
| Dexa                     | 3357   | 1025 |
|                          |        |      |
| <u>after filtration</u>  |        |      |
| AraC                     | 353    | 366  |
| Dexa                     | 2183   | 379  |

**Supplementary Table S3. miRNA enrichment for the AraC drug release in RS4;11.** Based on a p-value of  $p < 0.05$  the miRNA enrichment was used to identify disease and functional annotations.

| Disease/ Ontology                                 | adjusted p-value |
|---------------------------------------------------|------------------|
| Lymphoma, Primary Effusion                        | 9.00E-13         |
| Leukemia, Myeloid, Acute                          | 0.0000133        |
| Leukemia, Lymphoblastic, Acute, Childhood         | 0.000151         |
| Leukemia, Myeloid, Chronic                        | 0.000164         |
| Leukemia, Myeloid                                 | 0.000839         |
| Lymphoma, Hodgkin                                 | 0.00187          |
| Acute Megakaryoblastic Leukemia                   | 0.00187          |
| Leukemia, Promyelocytic, Acute                    | 0.00562          |
| Leukemia, Biphenotypic, Acute                     | 0.00893          |
| Leukemia-Lymphoma, Precursor B-Cell Lymphoblastic | 0.0204           |
| Leukemia, B-Cell                                  | 0.0477           |
|                                                   |                  |
| Tumor Suppressor miRNAs                           | 5.21E-11         |
| Cell Differentiation                              | 1.16E-10         |
| Cell Death                                        | 7.30E-10         |
| Folliculogenesis                                  | 1.09E-09         |
| Innate Immunity                                   | 2.16E-08         |
| Glucose Metabolism                                | 1.55E-07         |

|                                              |            |
|----------------------------------------------|------------|
| <b>Adipocyte Differentiation</b>             | 2.76E-07   |
| <b>Anti-Cell Proliferation</b>               | 4.19E-07   |
| <b>Hematopoiesis</b>                         | 4.95E-07   |
| <b>Cell Division</b>                         | 0.00000173 |
| <b>Cell Proliferation</b>                    | 0.0000129  |
| <b>T-Cell Differentiation</b>                | 0.0000282  |
| <b>Epithelial-to-Mesenchymal Transition</b>  | 0.000126   |
| <b>Hepatic Stellate Cell Differentiation</b> | 0.000147   |
| <b>Neural Stem Cell Differentiation</b>      | 0.000289   |
| <b>Osteoblast Differentiation</b>            | 0.000292   |
| <b>Aging</b>                                 | 0.000721   |
| <b>Cell Cycle</b>                            | 0.000749   |
| <b>Mesenchymal Stem Cell Proliferation</b>   | 0.000781   |
| <b>Inflammation</b>                          | 0.00127    |
| <b>Cardiac Regeneration</b>                  | 0.00187    |
| <b>Hormone-mediated Signaling Pathway</b>    | 0.00269    |
| <b>Megakaryocyte Differentiation</b>         | 0.00605    |
| <b>Immune Response</b>                       | 0.00675    |
| <b>Apoptosis</b>                             | 0.0145     |
| <b>Plasma Cell Differentiation</b>           | 0.0161     |
| <b>Wound Healing</b>                         | 0.019      |
| <b>Lipid Metabolism</b>                      | 0.0251     |
| <b>Bone Regeneration</b>                     | 0.0386     |
| <b>Carbohydrate Metabolism</b>               | 0.2088     |

**Supplementary Table S4. miRNA enrichment for the Dexa drug release in RS4;11.**  
Based on a p-value of  $p < 0.05$  the miRNA enrichment was used to identify disease and functional annotation for the Dexamethasone drug release in RS4;11.

| <b>Disease/ Ontology</b>                      | <b>adjusted p-value</b> |
|-----------------------------------------------|-------------------------|
| <b>Lymphoma, Primary Effusion</b>             | 1.26E-13                |
| <b>Leukemia, Myeloid, Acute</b>               | 3.81E-09                |
| <b>Leukemia, Myeloid, Chronic</b>             | 5.26E-08                |
| <b>Lymphoma, Hodgkin</b>                      | 1.57E-07                |
| <b>Leukemia, Lymphocytic, Chronic</b>         | 3.00E-06                |
| <b>Leukemia, Lymphoblastic, Acute</b>         | 5.73E-06                |
| <b>Leukemia</b>                               | 3.09E-05                |
| <b>Leukemia, Lymphoblastic, Acute, T-Cell</b> | 4.18E-04                |

|                                                      |          |
|------------------------------------------------------|----------|
| <b>Leukemia, Lymphocytic, Chronic, B-Cell</b>        | 6.00E-04 |
| <b>Lymphoma, Mantle-Cell</b>                         | 6.24E-04 |
| <b>Lymphoma, Large B-Cell</b>                        | 1.07E-03 |
| <b>Lymphoma, B-Cell</b>                              | 6.73E-03 |
| <b>Leukemia, Lymphoblastic</b>                       | 0.0294   |
|                                                      |          |
| <b>Cell Differentiation</b>                          | 2.97E-21 |
| <b>Tumor Suppressor miRNAs</b>                       | 1.16E-16 |
| <b>Cell Division</b>                                 | 1.58E-15 |
| <b>Cell Death</b>                                    | 6.50E-15 |
| <b>Cell Cycle</b>                                    | 2.47E-14 |
| <b>Aging</b>                                         | 3.04E-14 |
| <b>Epithelial-to-Mesenchymal Transition</b>          | 6.07E-12 |
| <b>Cell Proliferation</b>                            | 4.24E-11 |
| <b>T-Cell Differentiation</b>                        | 1.77E-10 |
| <b>Anti-Cell Proliferation</b>                       | 1.95E-10 |
| <b>Apoptosis</b>                                     | 5.10E-10 |
| <b>Hormone-mediated Signaling Pathway</b>            | 6.08E-10 |
| <b>Neuron Differentiation</b>                        | 1.78E-09 |
| <b>Glucose Metabolism</b>                            | 4.08E-09 |
| <b>Adipocyte Differentiation</b>                     | 1.89E-08 |
| <b>Innate Immunity</b>                               | 3.30E-07 |
| <b>Folliculogenesis</b>                              | 3.63E-07 |
| <b>Hematopoiesis</b>                                 | 7.63E-07 |
| <b>Immune Response</b>                               | 2.66E-06 |
| <b>Inflammation</b>                                  | 4.50E-06 |
| <b>Osteogenesis</b>                                  | 9.45E-06 |
| <b>Regulation of NF-<math>\kappa</math>B Pathway</b> | 3.34E-05 |
| <b>Bile Duct Proliferation</b>                       | 3.35E-05 |
| <b>Neutrophil Differentiation</b>                    | 3.35E-05 |
| <b>Cardiac Regeneration</b>                          | 4.47E-05 |
| <b>Regulation of Stem Cell</b>                       | 1.35E-04 |
| <b>Hepatic Stellate Cell Differentiation</b>         | 3.19E-04 |
| <b>Muscle Development</b>                            | 4.20E-04 |
| <b>Circadian Rhythm</b>                              | 5.31E-04 |
| <b>Neural Stem Cell Differentiation</b>              | 6.24E-04 |
| <b>Regulation of WNT Signaling Pathway</b>           | 6.24E-04 |
| <b>Osteoclastogenesis</b>                            | 6.24E-04 |
| <b>Peritoneal Cavity Homeostasis</b>                 | 6.62E-04 |
| <b>Brain Development</b>                             | 8.27E-04 |
| <b>Angiogenesis</b>                                  | 8.71E-04 |
| <b>Osteoblast Differentiation</b>                    | 9.96E-04 |
| <b>Neuron Apoptosis</b>                              | 1.07E-03 |



|                                             |          |
|---------------------------------------------|----------|
| <b>DNA Damage Response</b>                  | 1.40E-03 |
| <b>Transdifferentiation</b>                 | 1.67E-03 |
| <b>Embryonic Development</b>                | 1.78E-03 |
| <b>Smooth Muscle Cell Proliferation</b>     | 2.24E-03 |
| <b>Cardiomyocyte Differentiation</b>        | 3.13E-03 |
| <b>Granulopoiesis</b>                       | 3.41E-03 |
| <b>Cell Motility</b>                        | 4.07E-03 |
| <b>Skeletal Muscle Cell Differentiation</b> | 4.86E-03 |
| <b>Cardiomyocyte Proliferation</b>          | 6.12E-03 |
| <b>Osteoclast Differentiation</b>           | 9.44E-03 |
| <b>Natural Killer Cell Activation</b>       | 9.99E-03 |
| <b>Chondrogenic Differentiation</b>         | 0.0147   |
| <b>Cardiotoxicity</b>                       | 0.0165   |
| <b>Nephrotoxicity</b>                       | 0.0165   |
| <b>Embryonic Stem Cell Differentiation</b>  | 0.0169   |
| <b>Adipogenesis</b>                         | 0.0258   |
| <b>Chemosensitivity of Tumor Cells</b>      | 0.0263   |
| <b>Autophagy</b>                            | 0.0263   |
| <b>Toxicity</b>                             | 0.028    |
| <b>Cholesterol Homeostasis</b>              | 0.0331   |

**Supplementary Table S5. miRNA enrichment for the AraC drug release in SEM.** Based on a p-value of  $p < 0.05$  the miRNA enrichment was used to identify disease and functional annotation for the AraC drug release in SEM.

| <b>Disease/ Ontology</b>                    | <b>adjusted p-value</b> |
|---------------------------------------------|-------------------------|
| <b>Lymphoma, Large B-Cell, Diffuse</b>      | 1.00E-02                |
| <b>Leukemia, Myeloid, Acute</b>             | 0.0113                  |
| <b>Leukemia</b>                             | 0.0457                  |
|                                             |                         |
| <b>Skeletal Muscle Cell Differentiation</b> | 9.81E-05                |
| <b>Apoptosis</b>                            | 1.02E-03                |
| <b>Autophagy</b>                            | 3.84E-03                |
| <b>Tumor Suppressor miRNAs</b>              | 6.60E-03                |
| <b>Response to Hypoxia</b>                  | 8.80E-03                |
| <b>Epithelial-to-Mesenchymal Transition</b> | 0.0157                  |
| <b>Nephrotoxicity</b>                       | 0.0175                  |
| <b>Smooth Muscle Cell Proliferation</b>     | 0.0195                  |
| <b>Multiciliated Cell Differentiation</b>   | 0.0246                  |
| <b>Muscle Development</b>                   | 0.0263                  |
| <b>Peritoneal Cavity Homeostasis</b>        | 0.0312                  |
| <b>Osteogenesis</b>                         | 0.0329                  |
| <b>Actin Filament Network Formation</b>     | 0.0367                  |

|                     |        |
|---------------------|--------|
| <b>Aging</b>        | 0.039  |
| <b>Inflammation</b> | 0.0425 |

**Supplementary Table S6. miRNA enrichment for the Dexa drug release in SEM.** Based on a p-value of  $p < 0.05$  the miRNA enrichment was used to identify disease and functional annotation for the Dexa drug release in SEM.

| <b>Disease/ Ontology</b>                      | <b>adjusted p-value</b> |
|-----------------------------------------------|-------------------------|
| <b>Lymphoma, Primary Effusion</b>             | 1.39E-09                |
| <b>Thyroid Lymphoma</b>                       | 8.56E-05                |
| <b>Leukemia, Myeloid, Chronic</b>             | 3.29E-04                |
| <b>Lymphoma</b>                               | 1.22E-03                |
| <b>Lymphoma, Extranodal NK-T-Cell</b>         | 1.31E-03                |
| <b>Leukemia, Myeloid, Acute</b>               | 2.36E-03                |
| <b>Lymphoma, Mantle-Cell</b>                  | 6.31E-03                |
| <b>Lymphoma, Hodgkin</b>                      | 0.0103                  |
| <b>Lymphoma, Large-Cell, Anaplastic</b>       | 0.0256                  |
| <b>Leukemia, Lymphoblastic, Acute, B-Cell</b> | 0.0299                  |
| <b>Lymphoma, Large B-Cell, Diffuse</b>        | 0.045                   |
|                                               |                         |
| <b>Innate Immunity</b>                        | 2.93E-09                |
| <b>Tumor Suppressor miRNAs</b>                | 1.87E-08                |
| <b>Folliculogenesis</b>                       | 1.29E-06                |
| <b>Aging</b>                                  | 2.44E-06                |
| <b>Cell Differentiation</b>                   | 1.03E-05                |
| <b>Adipocyte Differentiation</b>              | 1.23E-05                |
| <b>Cell Division</b>                          | 1.59E-05                |
| <b>Ovarian Follicle Development</b>           | 3.47E-05                |
| <b>Hepatic Stellate Cell Differentiation</b>  | 8.56E-05                |
| <b>Neural Stem Cell Differentiation</b>       | 1.69E-04                |
| <b>T-Cell Differentiation</b>                 | 2.56E-04                |
| <b>Chromatin Remodeling</b>                   | 2.91E-04                |
| <b>Adipogenesis</b>                           | 6.42E-04                |
| <b>Cell Death</b>                             | 8.54E-04                |
| <b>Cardiac Regeneration</b>                   | 9.41E-04                |
| <b>Epithelial-to-Mesenchymal Transition</b>   | 1.25E-03                |
| <b>Glucose Metabolism</b>                     | 2.41E-03                |
| <b>Cell Proliferation</b>                     | 5.45E-03                |
| <b>Hematopoiesis</b>                          | 5.95E-03                |
| <b>Cell Cycle</b>                             | 6.55E-03                |
| <b>Skeletal Muscle Cell Differentiation</b>   | 0.0103                  |
| <b>Immune Response</b>                        | 0.0108                  |
| <b>Anti-Cell Proliferation</b>                | 0.0115                  |

|                                               |        |
|-----------------------------------------------|--------|
| <b>Peritoneal Cavity Homeostasis</b>          | 0.0117 |
| <b>Inflammation</b>                           | 0.027  |
| <b>Retinal Pigment Epithelium Development</b> | 0.0425 |
| <b>Angiogenesis</b>                           | 0.0463 |
| <b>Latent Virus Replication</b>               | 0.0495 |
