# Supplementary material for: Molecular Characterization of the Response to Conventional Chemotherapeutics in Pro-B-ALL Cell Lines in Terms of Tumor Relapse
Source: Genes (Basel). 2022 Jul 14;13(7):1240. doi: 10.3390/genes13071240 (PMC9316692; doi:10.3390/genes13071240)
Supplement: Supplementary file 1 [file genes-13-01240-s001.zip › Supplement file S2.xlsx]

## Sheet: Sample_overview
RS4 AraC	RS4 Dexa	SEM AraC	SEM Dexa
RS4.24_control	RS4.A_control	SEM.39_control	SEM.09_control
RS4.25_AraC.72.continuos	RS4.B_Dexa.72.continuos	SEM.40_AraC.72.continuos	SEM.10_Dexa.72.continuos
RS4.26_control	RS4.C_control	SEM.41_control	SEM.11_control
RS4.27_AraC.144.removed	RS4.D_Dexa.144.removed	SEM.42_AraC.144.removed	SEM.12_Dexa.144.removed
RS4.29_control	RS4.F_control	SEM.44_control	SEM.14_control
RS4.30_AraC.72.continuos	RS4.G_Dexa.72.continuos	SEM.45_AraC.72.continuos	SEM.15_Dexa.72.continuos
RS4.31_control	RS4.H_control	SEM.46_control	SEM.16_control
RS4.32_AraC.144.removed	RS4.I_Dexa.144.removed	SEM.47_AraC.144.removed	SEM.17_Dexa.144.removed
RS4.34_control	RS4.K_control	SEM.49_control	SEM.19_control
RS4.35_AraC.72.continuos	RS4.L_Dexa.72.continuos	SEM.50_AraC.72.continuos	SEM.20_Dexa.72.continuos
RS4.36_control	RS4.M_control	SEM.51_control	SEM.21_control
RS4.37_AraC.144.removed	RS4.N_Dexa.144.removed	SEM.52_AraC.144.removed	SEM.22_Dexa.144.removed

## Sheet: RS4_AraC
ENSEMBL	RS4_24_L1	RS4_24_L2	RS4_24_L3	RS4_24_L4	RS4_25_L1	RS4_25_L2	RS4_25_L3	RS4_25_L4	RS4_26_L1	RS4_26_L2	RS4_26_L3	RS4_26_L4	RS4_27_L1	RS4_27_L2	RS4_27_L3	RS4_27_L4	RS4_29_L1	RS4_29_L2	RS4_29_L3	RS4_29_L4	RS4_30_L1	RS4_30_L2	RS4_30_L3	RS4_30_L4	RS4_31_L1	RS4_31_L2	RS4_31_L3	RS4_31_L4	RS4_32_L1	RS4_32_L2	RS4_32_L3	RS4_32_L4	RS4_34_L1	RS4_34_L2	RS4_34_L3	RS4_34_L4	RS4_35_L1	RS4_35_L2	RS4_35_L3	RS4_35_L4	RS4_36_L1	RS4_36_L2	RS4_36_L3	RS4_36_L4	RS4_37_L1	RS4_37_L2	RS4_37_L3	RS4_37_L4
__alignment_not_unique	1779393	1694523	1796335	1717667	2522319	2397106	2547505	2421134	2319748	2209767	2299755	2213251	3231630	3070025	3204528	3086980	2266841	2145971	2245005	2150682	2880998	2744533	2883230	2744290	1986037	1890892	1977573	1905371	2998005	2859363	3004156	2894170	1975727	1899598	1956343	1904147	3250337	3134419	3229218	3134927	2228089	2148130	2200458	2136302	3252870	3155770	3234189	3156526
__ambiguous	110655	105732	111987	106595	99492	95888	101101	96377	130772	124523	130703	125834	128073	122627	128606	123646	129900	124127	130830	125150	111615	105948	111458	106621	123438	118374	123758	119038	124287	117794	124419	119334	113515	110199	113500	110381	103420	99652	103352	100233	113886	108853	114163	109815	125826	121641	125070	122244
__no_feature	475641	455326	481976	459271	476282	456448	484392	460328	395332	378799	393954	379614	351096	334677	348976	335969	418119	397591	417188	401457	424809	404160	422585	406085	445537	424465	442613	426912	393781	375955	394238	377652	423214	407706	419778	407816	407485	390818	403045	391547	365117	350511	362635	351516	402086	389837	399800	390130
__not_aligned	0	0	0	0	0	0	0	0	0	0	0	0	0	0	0	0	0	0	0	0	0	0	0	0	0	0	0	0	0	0	0	0	0	0	0	0	0	0	0	0	0	0	0	0	0	0	0	0
__too_low_aQual	0	0	0	0	0	0	0	0	0	0	0	0	0	0	0	0	0	0	0	0	0	0	0	0	0	0	0	0	0	0	0	0	0	0	0	0	0	0	0	0	0	0	0	0	0	0	0	0
ENSG00000000003	0	0	0	0	1	0	0	0	0	0	0	0	0	0	1	0	0	0	0	0	0	0	0	0	0	0	0	1	0	0	0	0	0	0	0	0	0	1	0	0	0	0	0	0	0	0	0	0
ENSG00000000005	0	0	0	0	0	0	0	0	0	0	0	0	0	0	0	0	0	0	0	0	0	0	0	0	0	0	0	0	0	0	0	0	0	0	0	0	0	0	0	0	0	0	0	0	0	0	0	0
ENSG00000000419	108	105	91	96	84	75	87	89	84	64	86	59	65	94	78	84	71	92	61	71	84	68	80	78	71	71	57	88	86	75	99	87	96	78	126	91	67	75	95	81	83	83	75	70	67	79	82	67
ENSG00000000457	42	32	42	33	37	38	41	35	31	12	34	29	36	34	26	26	28	30	32	28	24	45	35	40	23	40	32	35	35	34	33	35	30	41	28	33	37	35	28	30	21	24	22	25	32	37	30	25
ENSG00000000460	71	64	60	49	63	65	59	62	53	46	44	48	58	48	52	40	48	51	52	45	52	57	63	68	49	39	57	41	55	61	59	54	57	45	46	42	55	52	70	72	45	52	42	41	53	56	55	56
ENSG00000000938	0	0	0	0	0	0	0	0	0	1	0	0	0	0	0	0	0	0	1	0	0	0	1	0	0	0	0	0	0	0	0	0	0	0	1	0	0	0	1	0	1	0	0	0	0	0	0	1
ENSG00000000971	0	0	0	1	0	0	0	1	0	0	0	0	0	0	0	0	0	0	1	0	0	0	1	0	0	0	0	0	0	0	0	0	0	0	0	0	1	0	0	0	0	0	0	0	0	0	0	0
ENSG00000001036	7	5	8	9	5	1	4	8	8	8	9	6	3	6	5	2	6	7	9	3	5	1	3	5	5	7	6	2	7	7	8	1	6	4	4	3	7	6	5	3	3	13	6	6	3	5	4	7
ENSG00000001084	48	71	68	70	51	48	50	60	53	48	48	46	40	47	53	47	44	51	57	49	52	56	54	53	60	40	60	49	61	40	53	45	72	75	67	60	58	55	58	54	49	35	47	46	40	49	53	47
ENSG00000001167	212	221	235	243	172	186	193	179	198	162	170	178	196	219	192	186	199	243	183	216	170	152	164	172	220	204	210	206	192	194	189	199	214	175	195	225	177	153	157	176	188	198	172	188	190	169	203	221
ENSG00000001460	19	17	23	26	25	25	24	13	29	19	25	26	17	30	23	23	20	18	23	21	31	25	25	19	24	19	18	17	23	21	21	22	21	26	24	12	20	31	17	21	18	25	22	18	20	18	19	24
ENSG00000001461	159	131	145	120	180	143	147	150	181	163	163	152	155	142	134	135	173	165	167	170	139	154	164	167	169	160	179	172	122	116	151	119	137	135	134	152	133	117	126	109	159	179	163	164	141	132	124	142
ENSG00000001497	219	215	217	191	168	165	157	173	259	245	267	207	207	248	242	233	261	220	274	239	221	179	183	193	218	187	250	203	225	244	240	227	198	195	201	201	187	164	162	183	195	195	195	182	269	227	233	219
ENSG00000001561	1	0	0	0	0	0	0	0	0	0	0	0	0	0	0	0	0	0	0	0	0	0	0	0	0	0	0	0	0	0	0	0	0	0	0	0	0	0	0	0	0	0	0	0	0	0	0	0
ENSG00000001617	9	7	17	8	21	25	12	8	25	21	23	24	12	26	28	15	27	30	29	16	29	20	23	23	27	13	17	19	15	15	25	25	18	21	20	26	17	21	23	27	25	15	24	14	16	22	21	14
ENSG00000001626	0	0	0	0	0	0	0	0	0	0	0	0	0	0	0	0	0	0	0	0	0	0	0	0	0	0	0	0	0	0	0	0	0	0	0	0	0	0	0	0	0	0	0	0	0	0	0	0
ENSG00000001629	238	210	238	208	163	187	200	169	194	190	206	194	210	169	188	193	182	182	214	190	200	177	179	165	216	204	247	224	201	197	191	191	213	189	257	188	136	166	151	167	199	186	214	193	191	186	179	203
ENSG00000001630	13	17	7	18	14	13	10	13	27	31	40	25	15	22	20	22	28	33	24	25	28	16	17	18	18	22	18	30	16	14	15	21	20	25	22	20	14	17	14	9	20	15	19	25	21	28	24	15
ENSG00000001631	222	192	216	205	178	172	190	180	154	153	168	163	142	134	143	104	171	175	194	172	177	172	161	198	191	176	170	161	179	170	168	184	192	144	176	168	155	145	163	160	158	132	153	173	162	154	149	148
ENSG00000002016	59	49	63	68	54	48	63	58	69	77	84	50	63	62	44	56	85	71	65	83	68	69	59	56	67	59	73	59	53	51	54	63	67	75	62	38	46	53	56	52	62	51	76	62	63	61	55	61
ENSG00000002079	1	2	1	0	1	0	1	3	4	5	1	1	1	1	3	1	4	3	2	1	1	2	1	2	3	4	5	2	1	1	1	1	1	0	0	1	1	2	2	0	4	0	5	2	1	2	1	1
ENSG00000002330	26	22	21	23	30	25	24	34	46	49	32	29	49	44	35	45	42	39	30	46	37	41	41	40	32	29	25	32	39	41	35	32	26	28	33	32	30	44	25	27	32	23	32	33	48	38	25	42
ENSG00000002549	236	229	281	240	205	198	217	218	238	234	238	211	222	243	222	219	263	219	240	231	219	180	218	195	195	188	252	210	236	239	231	232	276	230	260	226	233	201	183	214	219	186	211	204	261	229	243	227
ENSG00000002586	204	190	194	176	192	201	189	183	260	266	294	276	250	218	222	256	245	215	253	273	253	223	238	249	229	219	261	265	249	220	250	241	215	188	222	192	209	231	215	215	239	249	254	243	230	245	272	230
ENSG00000002587	0	0	1	0	2	1	0	2	0	1	0	1	1	0	0	0	3	0	0	0	0	1	0	0	0	0	0	0	0	1	1	0	0	1	0	0	0	0	1	0	1	0	0	0	3	0	0	0
ENSG00000002726	0	1	0	0	0	0	0	1	0	0	0	0	0	0	0	0	1	0	0	0	1	0	0	1	0	0	1	0	0	1	0	0	0	0	0	0	0	0	0	2	0	1	0	1	1	0	0	0
ENSG00000002745	2	0	0	0	0	1	0	1	1	1	1	0	0	2	0	1	1	1	1	2	1	0	0	0	1	1	0	0	0	1	1	0	0	0	0	1	0	0	0	0	0	0	0	0	0	0	0	0
ENSG00000002746	1	2	2	3	2	4	2	2	0	2	0	1	3	2	1	0	2	3	0	0	1	2	1	0	4	2	0	0	1	3	4	1	4	2	2	1	1	3	2	0	2	1	3	5	1	1	3	2
ENSG00000002822	67	65	80	66	67	84	70	60	131	126	152	133	130	137	128	134	133	112	148	131	117	95	116	98	128	102	105	122	139	125	123	138	87	85	82	90	95	100	88	101	105	102	102	99	124	143	162	121
ENSG00000002834	257	252	233	249	341	323	321	292	398	392	452	368	377	364	365	360	376	366	372	380	371	359	370	334	409	422	398	387	336	334	337	331	264	253	273	254	342	299	333	327	310	340	338	348	344	343	384	383
ENSG00000002919	29	31	34	27	37	30	42	28	37	39	37	28	32	41	54	49	32	34	30	52	27	31	29	29	39	35	42	28	56	35	48	48	41	34	36	41	44	35	36	40	37	30	30	32	40	41	38	48
ENSG00000002933	0	0	0	0	0	0	0	0	0	0	0	0	0	0	1	0	0	0	0	0	0	0	0	0	0	0	2	0	0	0	0	0	0	0	0	0	0	0	0	0	0	0	0	1	1	0	0	1
ENSG00000003056	244	234	263	247	218	216	251	216	250	237	266	227	269	268	276	244	235	243	252	258	253	236	241	236	234	208	253	207	224	231	287	249	235	229	213	236	231	217	222	197	229	214	232	209	271	222	236	244
ENSG00000003096	12	13	17	8	10	10	10	6	18	11	12	9	13	15	21	15	13	6	4	4	6	13	2	5	10	8	5	11	8	10	14	7	14	8	9	10	6	3	9	3	3	12	5	5	5	9	10	9
ENSG00000003137	0	0	0	0	0	0	0	0	0	1	0	0	0	0	0	0	0	1	0	0	1	0	0	0	0	0	0	0	0	0	0	0	0	0	0	0	0	0	0	0	0	0	0	0	0	0	0	0
ENSG00000003147	7	2	4	4	10	5	7	9	2	2	4	3	9	3	7	2	0	3	3	3	2	1	4	7	1	4	1	0	4	4	3	6	2	2	3	3	6	5	10	4	2	3	3	3	9	7	5	2
ENSG00000003249	0	0	0	0	0	0	0	0	0	0	0	0	0	0	0	0	0	1	0	0	0	0	0	0	0	0	0	0	0	0	0	0	0	0	1	1	0	0	0	0	0	0	0	0	0	0	0	0
ENSG00000003393	66	51	65	54	50	58	70	67	53	50	49	59	47	42	49	46	59	64	58	63	70	56	48	47	49	66	58	52	52	56	63	52	59	61	59	51	38	50	56	50	51	56	55	60	47	38	47	56
ENSG00000003400	62	63	75	58	69	48	83	80	40	66	75	69	60	67	43	57	47	61	61	58	76	65	66	65	68	67	61	57	63	68	60	72	48	58	63	50	65	50	73	62	70	66	59	66	63	56	58	82
ENSG00000003402	89	77	89	91	86	88	94	89	109	86	81	94	90	78	64	68	89	95	112	92	82	98	81	102	114	120	117	99	89	79	75	83	90	84	88	82	75	86	61	72	95	79	71	64	100	71	86	88
ENSG00000003436	15	13	11	14	22	14	23	20	9	3	5	6	18	11	8	18	11	10	9	6	31	43	22	35	10	7	11	13	19	17	27	23	27	14	17	23	30	38	44	38	9	15	15	12	16	26	18	21
ENSG00000003509	49	57	50	65	55	45	59	57	48	43	49	44	53	41	40	50	52	54	53	46	47	40	51	50	52	55	43	48	52	51	32	55	32	43	57	44	46	36	48	41	49	48	35	43	54	56	63	45
ENSG00000003756	527	473	515	548	525	484	510	487	501	464	542	474	496	436	492	475	482	475	507	539	567	499	521	519	565	517	519	511	514	432	523	494	459	414	446	466	482	437	468	455	483	466	489	479	569	530	520	507
ENSG00000003987	11	12	7	10	11	10	9	8	8	9	4	2	5	4	2	6	5	4	5	8	4	14	6	6	8	3	4	8	8	4	10	7	9	4	12	5	15	3	4	9	7	7	6	6	9	12	7	11
ENSG00000003989	0	0	0	2	0	0	0	0	0	0	0	1	0	0	0	0	0	0	0	0	0	0	0	0	0	0	0	0	0	0	0	0	0	0	0	0	0	0	0	0	0	0	0	0	0	0	0	0
ENSG00000004059	170	162	184	167	148	164	152	144	246	294	302	297	269	315	347	291	290	269	268	268	241	248	207	217	276	213	242	234	271	274	268	242	220	218	204	206	206	230	183	177	250	223	218	244	327	240	285	282
ENSG00000004139	23	11	20	10	8	19	18	15	19	16	18	20	13	17	16	12	16	16	14	20	9	14	19	19	15	13	22	9	13	17	6	14	14	14	12	7	14	16	13	11	11	14	15	16	17	11	14	14
ENSG00000004142	175	190	228	201	171	184	184	175	227	243	229	212	238	230	262	248	253	276	260	266	223	191	226	206	205	203	238	248	252	239	254	232	237	203	208	209	212	202	216	207	221	188	239	231	273	252	236	248
ENSG00000004399	507	574	578	498	631	616	652	653	1042	952	1001	927	757	708	790	723	917	844	909	903	838	744	843	756	863	848	994	801	716	674	728	678	690	620	662	609	706	734	727	730	758	761	750	740	741	702	785	712
ENSG00000004455	824	752	821	758	708	669	694	654	752	730	768	746	857	782	816	802	697	693	758	714	686	674	695	682	730	671	727	681	863	758	768	788	693	706	676	689	639	644	656	616	718	622	721	648	739	759	786	737
ENSG00000004468	489	451	475	430	576	564	611	553	446	412	391	364	404	419	429	418	421	440	422	423	471	477	483	487	482	440	522	433	483	474	424	468	395	400	408	434	532	499	520	488	427	444	407	380	494	411	494	448
ENSG00000004478	137	110	135	114	122	119	133	115	149	144	146	149	166	130	149	121	144	136	154	137	115	120	136	132	111	119	154	127	124	132	113	127	137	127	130	141	115	84	102	115	114	107	109	106	130	108	149	112
ENSG00000004487	587	550	608	595	448	412	472	466	578	533	539	543	549	520	564	513	583	554	564	518	480	454	492	494	531	526	563	514	588	542	549	545	642	598	638	566	481	470	467	417	525	558	498	535	579	558	556	576
ENSG00000004534	330	297	328	308	257	214	260	207	249	264	280	232	215	210	221	231	305	295	294	258	207	192	190	198	285	287	276	302	232	232	262	239	277	266	236	253	195	185	174	181	261	229	227	225	222	245	249	226
ENSG00000004660	24	25	18	23	24	32	31	28	35	46	31	42	37	40	55	41	35	33	42	40	38	52	39	48	58	40	47	48	45	30	37	43	26	39	32	36	35	26	31	28	30	30	32	29	22	30	55	40
ENSG00000004700	167	170	190	176	157	157	193	159	125	128	136	140	137	121	141	151	130	129	133	135	159	176	154	145	144	130	153	129	160	162	160	143	160	140	127	158	160	157	159	153	140	138	143	133	172	171	140	144
ENSG00000004766	102	100	84	96	82	71	84	83	66	64	73	58	91	65	81	78	67	83	73	71	83	72	81	85	70	65	65	86	97	94	104	77	100	81	74	71	94	67	75	97	69	71	58	60	83	88	87	71
ENSG00000004776	1	0	0	0	1	1	0	0	0	0	2	2	0	2	0	0	3	2	1	3	0	0	2	0	1	3	1	0	1	0	2	0	0	1	0	0	0	1	0	2	2	2	3	2	1	0	1	0
ENSG00000004777	139	167	171	134	135	116	114	117	334	333	339	323	222	218	236	217	306	296	302	295	167	205	198	179	322	321	343	309	238	231	242	209	230	207	195	191	156	154	151	144	233	262	252	252	224	236	246	245
ENSG00000004779	142	164	134	153	104	101	109	107	143	125	124	127	134	135	139	127	137	112	124	132	120	112	125	103	125	121	88	104	178	126	150	135	143	141	146	138	115	131	140	120	121	119	135	125	125	138	146	132
ENSG00000004799	0	0	0	0	0	0	0	0	0	0	0	0	0	0	0	0	0	0	0	0	0	0	0	0	0	0	0	0	0	0	0	0	0	0	0	0	0	0	0	1	0	0	0	0	0	0	0	0
ENSG00000004809	73	74	66	74	51	64	64	78	68	51	59	59	77	55	69	44	60	56	63	71	67	58	63	66	76	58	71	72	59	59	82	59	56	58	64	76	68	58	55	67	64	62	62	69	62	72	62	54
ENSG00000004838	4	2	8	5	10	6	17	11	10	18	15	8	15	8	9	12	11	17	11	6	10	10	10	5	9	14	6	12	6	4	9	12	5	7	10	12	4	8	14	10	9	9	10	5	7	6	10	8
ENSG00000004846	0	0	0	0	0	1	0	1	1	0	0	0	0	0	0	0	0	0	1	0	0	0	0	0	1	2	1	0	0	0	0	0	1	0	0	2	0	0	0	1	0	0	0	0	2	1	0	0
ENSG00000004848	3	1	3	1	1	1	2	2	1	4	1	0	3	2	3	2	1	0	2	0	6	3	0	3	2	3	4	2	2	2	6	3	5	1	5	1	3	8	5	5	5	1	0	3	4	3	2	1
ENSG00000004864	133	100	128	124	91	93	87	82	88	85	89	77	88	103	98	88	92	85	105	102	68	76	88	80	89	85	83	100	108	89	99	97	110	99	115	105	78	73	76	84	82	100	80	93	95	104	104	92
ENSG00000004866	56	47	55	49	54	37	46	45	37	46	33	40	36	34	38	36	47	47	34	35	45	49	40	41	44	43	37	35	37	43	43	53	46	49	44	47	44	52	50	47	34	40	26	40	49	36	43	44
ENSG00000004897	309	277	306	261	230	255	259	241	228	205	185	184	215	233	209	224	194	193	197	195	242	232	245	223	192	192	197	169	241	234	267	233	274	274	266	256	227	239	224	239	230	205	213	197	244	241	281	214
ENSG00000004939	0	1	0	0	0	0	1	0	0	1	1	0	0	0	1	0	0	0	0	1	1	0	0	0	1	0	1	0	1	0	0	0	0	1	0	1	0	2	1	1	0	0	0	0	0	0	0	0
ENSG00000004948	0	0	0	0	0	0	0	0	0	0	0	0	0	0	0	0	0	0	0	0	0	0	0	0	0	0	0	0	0	0	0	0	0	0	0	0	0	0	0	0	0	0	0	0	0	0	0	0
ENSG00000004961	50	48	51	46	37	34	34	32	43	49	46	47	37	34	45	37	43	46	37	30	37	36	38	44	38	35	35	41	57	33	41	39	41	39	38	53	40	41	41	37	50	38	35	38	33	37	41	34
ENSG00000004975	134	130	137	132	150	139	131	148	221	195	246	206	199	203	202	212	221	228	197	219	203	167	158	189	206	209	216	208	214	199	191	173	197	177	146	174	158	166	173	159	195	186	164	180	203	192	221	206
ENSG00000005001	0	0	0	0	0	0	0	0	0	0	0	0	0	0	0	0	0	0	0	0	0	0	0	0	0	0	0	0	0	0	0	0	0	0	0	0	0	0	0	0	0	0	0	0	0	0	0	0
ENSG00000005007	371	355	408	398	338	318	278	316	593	602	614	541	513	491	538	524	639	572	612	582	430	399	425	440	417	422	436	456	466	445	408	451	512	457	550	474	404	385	430	382	463	452	480	451	494	475	525	477
ENSG00000005020	182	162	184	151	140	120	125	131	117	96	103	83	113	115	112	141	120	104	140	107	110	100	112	125	116	123	119	121	157	133	116	135	131	150	151	146	111	120	120	127	139	129	140	133	128	113	124	141
ENSG00000005022	600	596	575	524	439	459	492	500	592	557	564	568	635	566	624	597	676	610	634	635	534	468	505	516	561	498	541	545	589	579	641	581	575	614	577	546	523	498	532	506	515	496	499	477	603	565	621	595
ENSG00000005059	123	111	101	118	115	109	119	107	60	84	101	98	86	111	108	78	104	84	83	69	114	126	131	120	101	74	92	88	91	115	102	78	97	122	106	96	109	113	117	134	86	103	100	95	97	99	110	87
ENSG00000005073	8	7	8	6	4	4	3	4	10	9	5	11	6	7	9	8	7	3	6	5	3	4	7	1	6	8	7	5	5	9	8	3	6	8	8	6	3	3	8	5	5	6	3	4	2	3	3	5
ENSG00000005075	53	59	47	40	47	31	51	48	87	94	76	99	77	75	87	75	99	82	90	67	69	77	66	56	78	84	79	64	74	62	86	72	73	68	68	77	53	53	48	62	68	74	55	70	84	93	86	102
ENSG00000005100	281	238	285	247	217	200	234	194	254	228	254	236	248	197	226	233	251	251	243	284	211	220	195	201	265	224	266	204	239	244	247	247	256	239	288	264	211	204	222	201	232	228	209	190	266	244	250	251
ENSG00000005102	0	0	0	0	0	0	0	0	0	0	0	0	0	0	0	0	0	0	0	0	0	0	0	0	0	0	0	0	0	0	0	0	0	0	0	0	0	0	0	0	0	0	0	0	0	0	0	0
ENSG00000005108	11	8	8	10	20	21	25	16	9	6	14	9	12	10	16	16	8	4	6	13	17	14	19	21	9	15	9	11	11	7	6	4	3	8	7	8	16	16	18	16	11	6	11	5	13	10	17	17
ENSG00000005156	166	180	187	170	116	116	133	117	192	182	186	195	167	153	177	167	220	196	204	212	120	121	118	104	175	188	179	154	156	175	149	151	196	193	178	178	116	90	112	122	187	184	178	147	151	146	168	157
ENSG00000005175	148	130	133	145	114	123	105	100	74	79	88	84	87	77	92	81	68	70	89	86	99	115	108	81	98	78	86	84	105	102	104	89	122	116	146	104	118	107	88	101	86	68	82	88	81	90	81	93
ENSG00000005187	3	6	1	0	1	3	0	4	0	1	1	1	1	0	1	0	1	1	0	1	3	0	1	5	0	0	1	1	2	3	4	2	2	3	3	1	0	1	0	3	0	1	1	1	1	3	1	2
ENSG00000005189	22	24	27	18	30	18	23	26	17	8	16	12	23	21	17	26	16	15	9	16	18	20	28	12	13	20	14	10	22	16	13	13	10	7	10	11	22	12	13	15	10	14	14	9	15	16	13	16
ENSG00000005194	152	125	130	123	120	84	129	124	125	102	123	114	160	119	159	129	130	148	132	119	113	113	132	127	93	100	113	123	152	136	113	129	126	129	150	121	114	123	118	136	109	115	108	92	143	130	144	123
ENSG00000005206	268	297	287	250	260	239	247	251	534	514	580	469	376	353	373	349	486	479	503	518	366	307	346	332	474	461	477	452	359	384	385	369	413	347	362	388	271	298	270	327	397	355	376	386	381	392	389	345
ENSG00000005238	29	21	23	22	30	33	39	29	45	32	35	32	44	32	43	36	45	37	33	26	45	36	30	41	41	36	43	36	26	25	31	28	21	23	21	32	29	35	38	46	38	33	35	25	34	33	29	30
ENSG00000005243	6	10	5	4	6	4	10	17	8	7	5	7	9	7	11	10	5	3	5	15	19	6	12	16	10	10	15	11	8	10	14	6	11	5	3	9	14	10	7	11	8	14	9	8	5	16	10	8
ENSG00000005249	15	16	22	15	24	20	25	21	10	7	7	8	6	9	13	12	15	13	14	13	14	16	13	16	11	12	13	15	17	13	17	17	16	25	12	20	21	28	17	13	10	9	19	21	8	9	16	11
ENSG00000005302	143	149	179	141	140	123	133	138	144	131	134	136	126	123	134	145	127	117	111	124	119	125	120	110	146	128	140	147	123	122	124	138	107	114	146	128	122	110	106	92	140	127	164	143	147	135	140	136
ENSG00000005339	483	461	492	452	401	382	374	410	594	583	638	541	481	452	455	468	622	593	600	603	379	379	395	393	639	572	567	574	464	453	461	468	548	495	519	460	400	392	443	426	529	500	525	507	486	490	539	467
ENSG00000005379	157	165	182	156	139	143	128	124	301	297	281	314	162	166	163	170	270	246	281	260	175	151	148	137	294	313	302	293	184	142	195	189	228	201	211	190	126	146	116	145	236	214	229	228	159	183	181	161
ENSG00000005381	0	0	0	0	1	3	1	1	0	0	0	2	2	1	0	0	1	0	0	0	1	2	2	3	1	1	0	0	0	1	1	0	0	0	0	0	2	0	1	1	0	0	0	0	0	0	0	0
ENSG00000005421	0	0	0	0	0	0	1	0	0	0	0	1	0	0	1	0	0	0	0	0	0	0	0	0	0	0	1	1	0	0	0	0	0	0	0	0	0	0	0	0	0	0	0	0	0	0	0	0
ENSG00000005436	81	62	69	81	61	64	56	58	53	45	43	45	59	43	61	52	49	38	54	42	64	65	61	42	61	50	61	46	65	64	69	57	68	61	74	57	59	42	66	54	53	63	47	57	68	58	54	53
ENSG00000005448	88	77	95	76	64	63	85	73	169	194	159	171	156	154	164	146	167	152	158	135	118	92	95	94	180	167	190	158	111	132	130	115	77	106	107	84	71	69	68	72	136	135	155	130	134	132	138	150
ENSG00000005469	28	37	39	35	28	22	29	26	16	20	17	19	25	25	14	28	27	26	28	21	37	26	34	34	37	23	24	27	25	28	36	25	27	41	33	29	29	32	36	20	26	23	24	27	28	31	20	26
ENSG00000005471	36	35	41	43	71	57	53	64	45	47	55	39	54	43	57	51	55	42	49	58	64	69	56	60	70	58	72	60	45	55	48	52	49	38	45	29	65	52	64	56	54	60	58	57	52	50	58	44
ENSG00000005483	904	857	938	891	987	947	996	891	853	832	929	846	917	871	892	898	890	853	871	844	917	850	848	851	824	833	830	853	903	917	908	903	855	761	770	785	908	834	863	930	803	728	764	744	859	853	833	872
ENSG00000005486	39	33	42	43	33	33	40	34	50	50	56	45	56	48	49	59	59	64	62	55	46	50	40	40	45	45	46	36	54	50	46	57	54	47	53	43	47	49	50	47	52	46	38	41	49	43	57	43
ENSG00000005513	0	0	0	0	0	0	0	0	0	0	0	0	0	0	0	0	0	0	0	0	0	0	0	0	0	0	0	0	0	0	0	0	0	0	0	0	0	0	0	0	0	0	0	0	0	0	0	0
ENSG00000005700	245	228	236	247	227	229	225	229	186	184	197	182	185	199	172	161	182	169	198	168	202	188	219	202	215	180	187	186	212	189	214	181	227	213	222	211	215	199	192	200	197	179	184	201	183	189	186	191
ENSG00000005801	135	138	143	145	146	132	126	124	107	98	97	86	91	112	111	99	111	95	124	116	138	96	126	103	116	111	119	114	149	124	133	120	164	130	144	125	125	115	106	114	100	90	97	108	110	126	118	117
ENSG00000005810	926	865	896	884	1036	957	995	906	730	707	728	706	887	819	859	822	772	758	734	729	974	933	886	911	679	653	730	668	852	845	917	877	733	703	720	685	911	871	933	972	708	688	702	702	923	889	840	883
ENSG00000005812	164	161	182	145	173	148	174	153	136	131	129	146	147	151	123	106	115	124	130	133	161	170	158	152	114	99	128	119	148	141	130	147	174	174	170	132	156	140	151	135	149	126	137	139	130	114	133	109
ENSG00000005844	21	11	15	20	32	33	34	33	34	23	29	24	33	26	24	21	24	25	14	27	31	25	38	37	30	20	22	19	23	17	19	26	20	22	14	13	37	47	21	34	21	22	24	21	27	27	23	26
ENSG00000005882	24	14	19	26	21	27	30	26	37	36	44	30	36	27	30	39	35	36	32	45	37	38	43	42	30	46	33	33	33	32	31	34	29	22	35	42	33	41	49	34	24	32	29	34	35	40	25	26
ENSG00000005884	0	1	1	0	1	0	1	0	0	2	0	1	1	0	1	1	1	0	0	1	0	0	0	3	1	0	0	0	1	1	0	2	0	0	0	0	0	0	1	2	1	1	1	1	1	0	2	2
ENSG00000005889	345	312	339	303	260	275	273	267	240	251	247	229	246	227	263	224	231	200	273	239	218	259	253	224	222	253	224	204	301	239	267	277	310	240	283	253	250	217	228	222	221	219	221	217	260	287	240	228
ENSG00000005893	260	223	240	246	211	220	210	193	152	154	173	133	155	159	156	156	173	160	178	164	204	197	217	191	182	171	175	191	200	224	167	195	196	218	237	205	213	162	208	187	174	204	194	206	181	174	180	210
ENSG00000005961	19	16	15	25	65	85	70	64	90	60	67	66	83	78	84	90	65	65	64	52	110	98	115	119	93	80	87	79	54	79	66	75	27	27	22	25	67	62	67	61	50	52	57	52	71	80	95	89
ENSG00000005981	0	0	0	0	0	0	0	0	0	0	0	0	0	0	0	0	0	0	0	0	0	0	0	0	1	0	0	0	0	0	0	0	0	0	0	0	0	0	0	0	0	0	0	0	0	0	0	0
ENSG00000006007	82	100	95	82	59	60	69	63	81	62	78	79	73	66	62	67	98	80	76	68	71	54	58	61	74	85	96	57	75	78	81	83	87	93	97	86	50	73	79	54	71	67	82	69	75	61	80	88
ENSG00000006015	67	42	57	53	47	52	44	44	98	102	87	91	64	84	83	80	84	71	68	81	47	49	70	64	76	74	67	86	83	93	93	77	75	83	89	75	56	51	50	47	74	57	76	64	91	79	83	87
ENSG00000006016	3	1	10	7	6	6	8	6	4	5	8	7	5	6	2	6	6	6	7	6	6	5	4	2	3	11	9	10	5	6	6	2	4	4	6	4	3	7	5	8	1	2	6	6	6	7	8	4
ENSG00000006025	58	45	67	43	46	44	50	35	111	84	110	86	73	52	75	76	87	90	92	88	52	63	67	59	69	96	84	73	68	62	62	67	65	77	72	90	55	40	63	48	75	73	74	65	71	59	80	74
ENSG00000006042	2	0	0	0	0	0	3	0	0	2	0	0	0	0	0	0	1	0	0	0	0	1	1	1	1	0	0	1	1	1	1	1	1	0	0	0	0	3	0	0	0	0	1	0	0	0	2	1
ENSG00000006047	5	4	1	1	5	1	4	0	3	5	1	6	3	8	4	2	4	1	4	3	6	3	4	4	4	6	6	7	1	2	3	4	6	2	4	3	6	2	3	4	2	7	1	0	1	4	1	1
ENSG00000006059	0	0	0	0	0	0	0	0	0	0	0	0	0	0	0	0	0	0	0	0	0	0	0	0	0	0	0	0	0	0	0	0	0	0	0	0	0	0	0	0	0	0	0	0	0	0	0	0
ENSG00000006062	35	33	32	32	37	33	28	33	37	44	63	51	45	56	49	48	60	50	44	48	45	38	38	45	47	46	53	67	40	39	33	50	39	34	40	55	39	31	50	37	50	38	35	44	44	47	41	47
ENSG00000006071	1	0	0	0	3	3	4	3	1	0	0	1	0	2	0	0	0	0	1	0	4	1	2	3	1	1	1	1	2	1	0	0	1	0	1	0	6	7	4	7	1	1	0	1	0	3	2	2
ENSG00000006116	0	0	0	0	0	0	0	0	0	0	0	0	0	0	0	0	0	0	0	0	0	0	0	0	0	0	0	0	0	0	0	0	0	0	0	0	0	0	0	0	0	0	0	0	0	0	0	0
ENSG00000006118	1	0	1	0	1	1	1	1	0	1	2	1	1	1	1	3	0	0	0	0	0	1	2	2	1	0	0	1	0	1	1	1	2	0	0	0	1	0	1	0	1	3	0	0	1	1	3	1
ENSG00000006125	654	630	678	637	496	502	572	470	564	554	574	488	534	541	537	512	600	560	570	551	455	457	472	423	572	573	615	564	549	496	544	538	604	593	610	570	473	411	462	470	575	543	566	515	586	564	525	564
ENSG00000006128	0	0	0	0	0	0	0	0	0	0	0	0	0	0	0	0	0	0	0	0	0	0	0	0	0	1	0	0	0	0	0	0	0	0	0	0	0	0	0	0	0	0	0	0	0	0	0	0
ENSG00000006194	165	142	137	142	142	118	133	134	150	167	164	168	160	151	179	161	208	179	184	168	146	153	154	159	172	135	147	145	148	167	170	170	152	167	150	159	139	146	142	133	172	166	155	150	199	168	156	191
ENSG00000006210	0	0	1	0	0	0	0	0	0	0	0	0	0	0	0	0	0	0	0	1	0	1	0	0	0	0	0	0	0	0	0	0	0	0	0	0	0	0	0	0	0	0	0	0	0	1	0	0
ENSG00000006282	75	71	65	84	81	74	70	74	129	128	145	151	114	118	138	123	121	141	140	126	116	111	108	113	139	128	127	129	81	91	126	112	101	101	86	80	94	89	90	94	105	109	96	98	113	124	121	102
ENSG00000006283	0	0	0	0	0	0	0	2	0	0	0	0	0	0	0	0	0	0	0	0	0	1	0	0	0	0	0	0	0	0	0	0	0	0	0	0	0	1	0	0	0	0	0	0	1	0	0	0
ENSG00000006327	0	1	0	1	1	0	3	1	1	1	0	0	0	1	0	3	0	4	1	0	1	1	3	2	0	2	1	0	1	1	0	1	1	1	1	2	1	0	0	0	0	1	0	2	0	1	2	0
ENSG00000006377	0	0	0	0	0	0	0	0	0	0	0	0	0	0	0	0	0	0	0	0	0	0	0	0	0	0	0	0	0	0	0	0	0	0	0	0	0	0	0	0	0	0	0	0	0	0	0	0
ENSG00000006432	8	5	5	6	12	17	16	12	6	7	7	3	7	8	6	9	10	11	6	13	13	20	17	21	6	7	7	8	6	7	7	7	7	9	6	5	14	18	16	12	3	8	8	9	10	9	9	12
ENSG00000006451	88	64	87	73	81	66	52	73	49	56	69	51	72	58	64	64	61	66	41	49	68	64	62	62	55	56	54	55	68	59	69	75	61	79	67	64	64	61	76	62	78	67	59	55	66	63	61	71
ENSG00000006453	24	28	31	28	52	52	49	48	33	33	38	35	37	32	30	30	39	54	39	44	51	45	34	46	44	35	51	43	60	38	53	44	31	27	27	30	52	39	51	55	37	35	40	35	54	30	37	47
ENSG00000006459	106	95	98	84	99	98	86	112	60	68	62	72	84	68	92	66	77	82	68	78	65	96	84	84	82	74	83	72	61	57	71	72	79	84	85	72	78	82	74	63	65	69	76	70	70	79	83	79
ENSG00000006468	0	0	0	0	0	0	0	0	0	0	0	0	0	0	0	0	0	0	0	0	0	0	0	0	0	0	0	0	0	0	0	0	0	0	0	0	0	0	0	0	0	0	0	0	0	0	0	0
ENSG00000006530	20	22	18	18	21	26	25	17	14	20	23	22	13	20	15	16	14	19	18	8	13	23	18	17	20	20	13	10	14	17	8	15	10	14	16	16	14	25	11	16	12	13	19	12	12	15	13	22
ENSG00000006534	36	43	62	53	73	65	67	68	101	105	100	95	85	89	82	82	77	79	85	72	73	78	89	95	84	86	93	68	66	74	79	74	46	55	67	53	89	71	67	64	85	78	80	79	69	72	67	57
ENSG00000006555	0	0	0	0	0	0	0	0	0	0	0	0	0	0	0	0	0	0	0	0	0	0	0	0	0	0	0	0	0	0	0	0	0	0	0	0	0	0	0	0	0	0	0	0	0	0	0	0
ENSG00000006576	187	171	166	139	163	143	151	135	120	122	114	117	124	117	119	97	132	115	149	120	136	140	143	138	114	121	119	97	118	123	128	114	142	129	146	138	125	122	131	138	134	131	133	111	116	130	129	112
ENSG00000006606	0	0	0	0	0	0	0	0	0	0	0	0	0	0	0	0	0	0	0	0	0	0	0	0	0	0	0	0	0	0	0	0	0	0	0	0	0	0	0	0	0	0	0	0	0	0	0	0
ENSG00000006607	132	140	129	142	126	145	116	126	126	117	109	124	119	118	111	143	129	130	143	130	135	131	130	130	126	106	125	119	132	127	148	126	165	125	142	112	142	127	135	122	134	106	114	112	160	111	119	124
ENSG00000006611	0	0	0	0	0	0	0	0	0	0	0	0	0	0	0	0	0	0	0	0	0	0	0	0	0	0	0	0	0	0	0	0	0	0	0	0	0	0	0	0	0	0	0	0	0	0	0	0
ENSG00000006625	86	50	64	77	48	54	66	54	43	43	68	42	67	45	43	57	49	48	45	57	56	47	43	65	58	42	47	49	49	41	38	52	67	80	62	65	49	50	54	53	62	47	46	47	45	59	45	58
ENSG00000006634	278	292	301	272	220	213	209	235	169	174	165	155	204	206	184	187	154	174	176	185	234	193	207	199	179	181	183	193	278	257	260	217	263	260	245	242	234	238	222	219	209	180	185	175	251	209	226	222
ENSG00000006638	4	6	8	6	11	4	9	4	4	8	9	9	8	10	6	2	9	3	7	10	8	7	16	11	4	4	5	6	6	7	10	5	5	5	6	4	13	7	13	9	10	8	8	10	4	11	11	2
ENSG00000006652	133	137	167	135	114	106	99	126	97	95	116	86	101	98	92	106	107	103	95	97	109	104	126	126	105	105	114	135	116	114	118	108	128	132	133	149	117	137	98	109	114	115	125	113	103	116	112	112
ENSG00000006659	0	0	0	0	0	0	0	0	0	0	0	0	0	0	0	0	0	0	0	0	0	0	0	0	0	0	0	0	0	0	0	0	0	0	0	0	0	0	0	0	0	0	0	0	0	0	0	0
ENSG00000006695	58	71	47	36	37	32	25	29	41	54	51	62	41	46	49	52	48	59	56	42	40	35	51	35	61	56	55	50	57	41	43	48	52	68	63	68	45	35	39	42	50	49	71	53	48	38	49	55
ENSG00000006704	45	53	60	59	66	50	54	50	95	102	96	88	93	71	64	61	83	87	93	88	69	62	64	71	97	79	91	94	73	88	91	86	71	73	65	68	70	52	65	62	70	72	68	74	77	78	68	71
ENSG00000006712	127	119	112	120	108	97	124	96	195	119	173	155	184	151	177	149	159	157	171	151	144	121	134	113	148	154	146	138	147	130	139	125	108	124	127	135	126	89	108	105	143	118	142	137	167	134	152	164
ENSG00000006715	78	89	86	79	82	80	115	95	78	64	77	71	91	94	85	79	83	77	75	81	74	72	78	90	100	62	68	85	101	81	85	81	87	81	79	72	86	63	86	78	80	75	85	66	85	71	83	70
ENSG00000006740	7	8	7	9	13	6	9	12	7	4	10	5	6	5	4	9	7	10	0	10	6	14	8	8	8	9	11	9	5	5	5	7	5	7	5	3	8	11	15	4	4	8	7	3	5	5	10	4
ENSG00000006744	307	313	286	286	211	231	253	252	355	372	404	359	357	379	397	360	378	356	389	406	280	267	296	309	342	311	372	341	398	341	386	395	368	329	334	296	315	294	300	279	321	346	332	312	350	393	347	325
ENSG00000006747	0	0	0	0	0	0	1	0	0	0	0	0	0	0	0	0	0	0	0	0	0	0	0	0	0	0	0	0	0	0	0	0	0	0	0	0	1	0	0	0	0	0	0	0	0	0	0	0
ENSG00000006756	118	82	89	109	147	164	145	128	117	114	135	119	139	121	123	114	100	107	126	130	179	167	183	162	131	125	140	116	118	95	118	156	118	106	127	121	178	153	161	154	118	116	113	116	123	124	115	125
ENSG00000006757	0	0	0	0	0	0	0	0	0	0	0	0	0	0	0	0	0	0	0	0	0	0	0	0	0	0	0	0	0	0	0	0	0	0	0	0	0	0	0	0	0	0	0	0	0	0	0	0
ENSG00000006788	48	35	26	31	96	115	120	88	47	46	40	47	77	59	84	58	35	30	31	40	130	100	112	110	69	51	64	51	60	63	65	50	56	34	30	50	95	107	101	81	46	44	34	42	57	63	65	66
ENSG00000006831	478	466	524	478	455	434	480	412	496	417	467	410	447	410	456	421	464	446	470	455	414	394	427	389	437	453	464	441	455	465	443	427	450	433	431	444	383	376	393	404	441	403	396	431	430	444	467	440
ENSG00000006837	3	6	5	2	3	1	6	1	2	1	5	5	6	0	4	5	3	4	3	1	2	4	1	1	3	4	1	1	2	6	2	3	3	4	4	5	1	3	1	3	0	3	4	1	1	2	1	1
ENSG00000007001	0	0	0	0	0	0	0	0	0	0	1	0	0	0	0	0	0	0	0	0	0	0	0	0	0	0	0	0	0	0	0	0	0	0	0	0	0	0	0	0	0	0	1	0	0	0	0	0
ENSG00000007038	0	0	0	0	0	0	0	0	0	0	0	0	0	0	0	0	0	0	0	0	0	0	0	0	0	0	0	0	0	0	0	0	0	0	0	0	0	0	0	0	0	0	0	0	0	0	0	0
ENSG00000007047	100	86	84	72	87	96	110	99	127	125	152	137	127	157	126	133	153	139	146	127	106	103	112	113	141	154	128	142	112	103	102	106	102	125	122	116	100	109	107	124	109	111	122	133	119	120	136	119
ENSG00000007062	1492	1460	1529	1418	1161	1157	1231	1155	1246	1201	1276	1219	1240	1189	1222	1204	1284	1272	1253	1191	1175	1122	1173	1122	1459	1345	1467	1341	1469	1384	1520	1509	1406	1353	1402	1344	1093	1146	1228	1075	1332	1271	1357	1240	1418	1345	1346	1354
ENSG00000007080	103	100	94	97	92	70	67	69	171	161	149	169	159	164	187	168	207	159	193	155	103	101	119	113	141	120	128	134	149	146	159	161	122	145	119	152	105	95	94	101	148	132	132	126	187	183	167	168
ENSG00000007129	35	36	33	36	38	36	32	33	47	37	37	42	43	33	37	45	51	35	45	45	47	56	42	36	25	33	37	45	49	54	40	47	27	27	29	36	38	30	57	43	36	39	57	41	54	47	60	46
ENSG00000007168	531	469	546	512	492	422	485	479	404	387	407	380	454	384	415	403	435	416	379	377	427	410	436	405	406	388	396	401	450	426	470	419	424	418	454	453	403	406	417	380	419	391	403	381	455	428	427	430
ENSG00000007171	2	1	2	2	3	0	3	11	1	3	5	5	3	1	5	1	0	0	3	3	2	3	4	3	0	1	3	4	5	3	3	2	1	1	4	3	1	3	4	6	0	1	0	4	2	2	2	2
ENSG00000007174	0	0	0	2	2	0	1	0	0	0	0	2	0	0	1	0	1	0	0	1	0	0	0	0	0	1	0	0	0	0	1	1	0	0	0	0	0	0	0	0	0	1	0	0	1	0	0	0
ENSG00000007202	730	737	762	696	641	620	642	644	831	810	812	775	764	720	781	754	906	850	887	828	680	634	730	607	783	711	716	706	755	674	700	671	802	707	803	768	687	637	692	619	709	635	700	732	796	686	802	768
ENSG00000007216	0	0	0	0	0	0	0	0	0	0	0	0	0	0	0	0	0	0	0	0	0	0	0	0	0	0	0	0	0	0	0	0	0	0	0	0	0	0	0	0	0	0	0	0	0	0	0	0
ENSG00000007237	458	419	434	450	640	582	693	675	620	577	593	618	633	647	641	621	571	514	567	545	650	563	714	686	601	575	618	642	618	670	707	649	496	435	501	480	645	644	723	644	532	547	490	518	741	661	690	726
ENSG00000007255	32	33	23	30	37	34	34	34	70	69	56	49	76	52	74	71	57	69	55	62	61	39	45	44	48	40	60	47	41	49	58	41	39	47	44	33	48	35	42	43	38	29	51	50	70	53	57	48
ENSG00000007264	6	0	3	4	5	4	7	4	10	5	4	6	13	6	5	6	3	3	9	7	4	5	2	4	2	3	2	7	4	5	6	6	8	2	4	4	2	5	2	5	3	1	2	3	6	4	5	5
ENSG00000007306	0	0	0	0	0	0	0	0	0	0	0	0	0	0	0	0	0	0	0	0	0	0	0	0	0	0	0	0	0	0	0	0	0	0	0	0	0	0	0	0	0	0	0	0	0	0	0	0
ENSG00000007312	109	100	116	119	102	112	127	120	219	193	206	199	209	176	223	194	189	205	196	198	164	162	170	148	188	220	178	180	171	154	168	197	139	139	164	153	155	145	146	148	152	164	154	192	240	187	205	200
ENSG00000007314	16	8	14	8	14	10	16	6	20	14	16	17	9	5	10	12	14	6	20	11	15	14	12	16	15	21	17	18	14	9	3	7	18	11	13	8	7	18	12	16	11	14	16	6	9	4	9	6
ENSG00000007341	13	17	43	18	13	20	25	25	16	16	16	15	16	15	14	21	17	16	14	20	16	19	14	9	18	15	18	10	14	12	10	14	21	22	20	19	14	13	13	17	17	14	14	15	16	10	18	16
ENSG00000007350	0	0	0	0	0	0	0	0	0	0	0	0	0	0	0	0	0	0	0	0	0	0	0	0	0	0	0	0	0	0	0	0	0	0	0	0	0	0	0	0	0	0	0	0	0	0	0	0
ENSG00000007372	5	7	8	3	8	7	10	4	6	9	11	8	7	3	3	9	5	7	3	6	7	5	3	6	4	9	6	10	3	6	11	6	3	8	4	6	5	8	7	6	3	2	2	7	4	3	9	2
ENSG00000007376	86	75	79	90	66	68	75	71	157	137	173	159	164	132	138	154	168	154	158	127	99	99	108	109	131	119	134	110	147	139	138	150	116	124	129	131	110	105	118	113	112	116	132	131	146	148	159	128
ENSG00000007384	0	0	0	1	2	0	0	0	4	3	5	5	0	0	3	0	2	4	0	2	1	2	1	6	1	4	0	4	0	5	3	1	0	2	2	0	0	0	2	2	0	1	1	1	5	2	1	2
ENSG00000007392	192	161	197	186	161	130	132	124	165	158	165	145	163	160	167	159	172	168	184	199	129	150	149	154	149	150	171	154	159	159	177	173	177	159	161	168	121	137	130	122	150	146	157	145	190	170	167	158
ENSG00000007402	3	1	1	2	1	3	0	1	3	2	4	3	0	1	4	2	3	2	4	3	1	0	0	1	4	8	7	3	8	3	5	4	3	3	2	1	0	3	2	0	1	1	5	4	2	2	2	3
ENSG00000007516	11	8	7	13	16	22	12	25	19	19	24	13	22	23	13	18	10	23	21	9	16	11	19	18	16	16	20	16	22	9	16	14	9	8	18	13	16	19	12	17	12	14	11	10	12	14	12	13
ENSG00000007520	52	55	58	57	58	41	60	43	97	88	85	103	86	72	90	60	98	64	82	89	90	73	77	75	68	72	76	76	96	84	87	75	88	79	90	84	52	66	64	86	72	72	72	75	77	74	62	81
ENSG00000007541	74	49	80	68	63	73	68	65	127	125	121	151	120	110	109	93	133	121	117	127	102	87	93	80	107	123	115	124	108	124	121	106	114	112	114	104	109	91	94	75	104	94	111	102	114	121	123	123
ENSG00000007545	104	113	98	110	118	105	122	111	97	119	134	113	111	106	119	116	143	124	128	142	127	123	106	135	107	123	117	121	123	100	120	116	98	99	102	113	126	120	125	111	108	100	106	97	127	115	141	121
ENSG00000007866	8	3	3	2	2	0	5	3	7	3	5	4	5	3	3	4	4	5	3	5	5	3	2	3	7	1	5	3	1	4	1	5	4	8	5	4	2	5	2	5	6	3	8	3	1	3	2	2
ENSG00000007908	0	0	0	0	0	0	0	0	0	0	0	0	0	0	0	0	0	0	0	0	0	0	0	0	0	0	0	0	0	0	0	0	0	0	0	0	0	1	0	0	0	0	0	0	0	0	0	0
ENSG00000007923	127	126	131	148	108	100	113	97	144	133	144	140	139	130	122	127	168	165	141	164	115	109	116	115	122	135	128	149	164	158	134	135	143	146	163	117	119	122	108	120	143	101	122	111	131	141	151	138
ENSG00000007933	0	0	0	0	0	1	1	0	0	0	1	0	0	0	0	0	0	0	0	0	0	0	0	0	0	0	0	1	0	0	0	0	1	0	0	0	0	0	0	0	0	0	0	0	0	0	0	0
ENSG00000007944	93	69	77	82	117	111	100	95	104	89	89	103	79	76	77	83	111	95	106	117	92	116	106	106	90	99	91	105	84	76	74	65	74	66	71	71	98	74	76	75	81	97	69	75	80	71	74	70
ENSG00000007952	0	0	0	0	0	0	1	0	0	0	1	0	0	0	0	1	0	0	0	0	0	0	0	0	0	0	0	0	0	1	0	0	0	0	0	0	1	1	0	0	0	0	0	0	0	1	1	1
ENSG00000007968	544	530	559	542	477	484	525	489	639	634	640	617	587	525	624	550	702	685	630	641	542	517	535	565	577	575	637	587	564	579	575	608	631	638	655	613	534	496	506	535	561	531	554	537	572	631	574	579
ENSG00000008018	272	262	317	283	235	196	244	210	251	256	228	228	275	276	236	294	249	257	287	249	239	228	261	222	239	229	270	230	244	280	267	298	273	275	272	252	216	215	251	189	252	211	252	219	301	295	269	284
ENSG00000008056	0	0	0	1	1	1	1	3	3	2	2	3	1	0	1	0	0	1	2	2	0	5	0	1	1	1	0	3	2	0	0	0	0	1	0	0	0	1	0	1	3	1	1	1	3	1	0	1
ENSG00000008083	388	330	414	366	382	371	376	379	440	460	542	447	412	412	396	405	480	433	473	461	383	400	449	395	433	431	426	436	387	379	377	399	393	364	378	375	370	365	400	357	378	447	428	402	416	411	466	374
ENSG00000008086	6	12	10	6	20	15	18	17	18	7	7	7	13	5	9	10	8	10	14	10	15	9	13	11	5	9	12	14	5	8	9	8	11	7	7	12	8	8	16	13	10	12	8	10	10	14	7	12
ENSG00000008118	0	0	0	0	0	0	0	0	0	0	0	0	0	0	0	0	0	0	0	0	0	0	0	0	0	0	0	0	0	0	0	0	0	0	0	0	0	0	0	0	0	0	0	0	0	0	0	0
ENSG00000008128	27	25	21	26	29	21	26	23	28	28	33	33	24	32	32	27	46	40	36	39	25	24	37	34	34	33	35	36	35	32	29	22	29	31	30	37	25	30	22	32	35	32	27	36	29	29	31	27
ENSG00000008130	214	196	201	211	203	180	190	197	259	292	256	249	251	259	254	255	291	260	282	270	248	235	263	221	248	216	244	221	321	272	290	272	247	258	248	258	274	233	253	209	206	208	212	206	285	275	284	269
ENSG00000008196	0	0	0	1	0	0	0	0	0	0	0	0	0	0	0	0	0	0	0	0	0	0	0	0	0	0	0	0	0	0	0	0	0	0	0	0	0	0	0	0	0	0	0	0	0	0	0	0
ENSG00000008197	0	0	0	0	0	0	0	0	0	0	0	0	0	0	0	0	0	0	0	0	0	0	0	0	0	0	0	0	0	0	0	0	0	0	0	0	0	0	0	0	0	0	0	0	0	0	0	0
ENSG00000008226	8	2	5	2	4	5	6	5	12	14	9	9	10	15	7	7	11	11	16	8	7	6	4	7	11	17	9	11	8	8	16	10	9	7	11	8	7	5	1	10	9	8	10	5	7	7	13	3
ENSG00000008256	45	42	33	39	46	31	46	35	46	43	57	49	30	54	45	45	40	45	53	50	41	31	41	46	44	51	39	44	45	39	45	39	40	49	43	40	32	33	38	31	40	43	33	43	41	39	31	47
ENSG00000008277	104	114	106	103	93	74	89	95	81	91	87	74	85	85	88	67	79	64	86	105	85	99	98	82	99	104	112	85	95	78	97	89	93	90	85	89	91	72	69	79	101	100	80	96	88	84	98	83
ENSG00000008282	361	358	406	379	351	334	324	312	262	241	269	264	306	311	310	261	280	226	254	259	258	317	321	291	273	281	292	257	343	345	351	320	364	342	367	363	330	303	287	320	288	275	249	285	318	307	323	316
ENSG00000008283	19	8	15	16	12	14	12	18	18	19	15	22	11	14	18	14	19	15	18	17	21	17	21	16	21	17	18	20	12	31	13	18	22	14	15	16	5	16	13	11	19	15	21	29	22	18	19	15
ENSG00000008294	410	410	430	420	500	475	469	393	370	342	367	331	400	359	360	352	341	346	346	325	424	387	415	397	370	354	360	330	391	328	362	339	379	348	351	334	392	369	381	358	343	389	398	384	375	389	360	358
ENSG00000008300	20	19	17	24	34	21	26	24	44	52	43	55	25	29	23	22	44	35	41	40	39	26	43	45	46	53	52	61	26	42	39	27	36	26	32	19	27	15	26	21	44	27	35	38	23	32	29	31
ENSG00000008311	237	224	237	243	179	184	197	174	173	189	189	187	148	145	169	159	197	173	188	187	197	174	201	191	195	209	186	175	184	198	200	173	213	188	170	172	187	151	159	173	189	153	205	176	179	185	176	171
ENSG00000008323	0	2	0	0	0	2	0	0	2	0	1	1	0	0	0	1	3	0	0	0	0	0	0	0	0	0	1	0	0	0	0	0	1	0	0	0	1	1	0	0	0	0	0	1	1	0	1	1
ENSG00000008324	44	48	48	53	43	28	40	36	46	39	38	39	51	30	36	43	29	38	35	44	41	37	52	33	33	41	39	39	50	40	47	47	46	45	51	60	41	49	40	35	42	39	38	43	36	47	45	60
ENSG00000008382	23	21	40	20	26	28	25	21	58	47	55	50	45	41	47	38	51	41	40	60	50	37	45	45	34	47	41	30	53	64	48	44	37	35	36	43	34	41	24	41	41	42	43	29	59	61	52	34
ENSG00000008394	1	0	0	0	0	0	1	0	0	0	0	0	0	0	0	0	1	0	0	1	0	0	0	0	0	0	0	0	0	0	0	0	0	0	1	0	0	0	1	1	0	0	0	0	0	1	0	0
ENSG00000008405	61	71	59	63	37	53	65	46	36	44	31	43	57	40	34	37	62	50	55	61	42	41	49	42	44	27	45	27	38	53	52	46	36	50	50	61	54	50	43	56	39	36	49	38	49	31	44	48
ENSG00000008438	3	0	2	3	1	1	1	1	6	2	1	4	3	4	4	1	4	2	1	5	2	1	2	1	1	3	4	1	1	2	4	1	1	4	4	1	5	2	4	1	2	4	3	4	3	3	3	2
ENSG00000008441	103	105	93	114	92	85	106	101	124	135	163	137	95	116	119	91	139	149	152	122	106	100	105	115	131	116	137	111	94	127	113	120	151	116	131	113	90	95	124	76	136	127	128	134	123	101	113	121
ENSG00000008513	207	172	194	162	211	235	202	242	256	237	236	235	222	230	210	239	262	240	246	225	225	236	250	245	226	200	232	230	180	200	190	160	225	197	219	200	235	234	229	197	250	209	223	209	235	174	217	224
ENSG00000008516	3	6	4	5	3	4	5	8	11	7	6	15	9	12	6	9	10	7	6	7	5	9	7	11	10	14	9	6	4	7	4	6	5	10	6	7	4	6	8	5	8	10	10	7	5	3	6	6
ENSG00000008517	1	0	0	0	2	0	1	3	0	2	1	0	0	1	0	0	0	0	1	1	0	3	0	0	1	1	1	0	0	0	1	0	0	0	0	0	0	0	0	1	0	0	1	0	1	0	0	0
ENSG00000008710	379	322	332	327	329	316	296	279	732	701	713	771	490	493	470	478	640	619	689	639	445	414	390	382	620	646	638	613	467	465	494	471	427	427	430	453	377	378	368	378	499	517	567	475	449	463	476	484
ENSG00000008735	4	5	0	4	3	6	3	4	7	11	11	7	4	5	3	8	10	16	6	7	3	5	10	6	5	8	6	14	8	3	8	5	5	3	6	6	6	6	7	7	6	10	9	4	5	9	5	8
ENSG00000008838	178	178	207	206	167	159	196	176	316	289	306	312	260	255	287	267	345	313	329	312	235	225	212	217	281	297	296	286	288	249	274	238	238	224	247	253	232	217	211	203	256	251	254	212	289	248	301	316
ENSG00000008853	27	14	24	23	27	20	29	22	40	44	33	41	34	28	35	44	44	41	50	40	31	35	40	31	42	24	34	38	30	37	37	31	34	32	32	33	35	28	30	31	24	33	24	30	52	26	36	34
ENSG00000008869	210	222	226	220	244	233	234	245	222	169	193	190	184	200	161	199	195	187	178	239	252	206	242	198	237	177	208	224	219	180	228	186	204	189	187	187	237	188	213	198	183	205	202	170	217	200	233	197
ENSG00000008952	251	217	252	232	203	192	203	224	154	165	176	181	176	166	200	174	181	151	167	174	199	188	215	213	175	163	198	174	200	207	185	170	202	203	226	225	197	199	206	208	176	150	145	171	177	166	182	163
ENSG00000008988	2322	2337	2381	2350	2142	2036	2152	1991	2482	2382	2465	2320	2853	2678	2759	2676	2579	2434	2581	2501	2190	2080	2111	2220	2231	2151	2309	2133	2335	2172	2378	2268	2133	2078	2120	2022	1922	1918	1979	1839	2227	2198	2239	2283	2630	2565	2584	2506
ENSG00000009307	1807	1633	1706	1734	1405	1309	1440	1365	1339	1332	1463	1399	1529	1426	1485	1402	1462	1291	1413	1351	1339	1326	1332	1307	1441	1262	1369	1325	1524	1536	1501	1490	1553	1512	1576	1473	1211	1190	1217	1207	1330	1364	1418	1302	1506	1475	1545	1512
ENSG00000009335	426	388	395	432	289	305	339	327	318	330	312	299	294	333	317	315	332	347	342	313	337	308	366	308	343	322	329	327	396	359	388	339	418	399	428	397	388	346	369	369	316	306	336	331	339	360	348	326
ENSG00000009413	328	322	323	312	450	397	485	450	253	261	268	270	294	279	293	295	293	285	264	253	426	386	424	389	239	231	249	239	367	328	336	307	268	270	291	263	439	399	423	367	229	228	224	211	336	301	320	312
ENSG00000009694	0	2	0	0	1	1	1	3	0	2	1	0	2	0	1	1	0	0	2	1	2	2	0	0	0	0	0	1	0	3	2	0	1	0	0	1	0	0	0	1	0	0	1	1	1	0	2	2
ENSG00000009709	0	0	0	0	0	0	0	0	0	0	0	0	0	0	0	0	0	0	0	0	0	0	0	0	0	0	0	0	0	0	0	0	0	0	0	0	0	0	0	0	0	0	0	0	0	0	0	0
ENSG00000009724	21	16	18	19	22	19	11	20	21	21	25	21	18	18	22	22	22	30	22	21	24	20	12	27	28	33	24	30	28	23	28	22	22	18	22	20	12	19	17	14	25	20	23	25	37	19	29	29
ENSG00000009765	0	0	1	2	2	0	1	1	0	1	0	0	0	0	2	3	0	1	1	1	2	0	0	0	1	0	1	0	0	2	0	1	0	2	2	0	1	0	0	0	0	0	0	2	2	0	0	0
ENSG00000009780	41	38	35	37	27	22	29	31	29	25	27	28	22	26	27	25	22	23	26	24	30	28	30	20	23	19	33	25	26	27	18	25	46	32	34	30	33	33	18	23	29	18	28	23	22	21	23	32
ENSG00000009790	36	28	34	31	65	59	85	58	37	39	38	46	50	54	53	52	47	40	58	47	70	74	57	60	48	47	45	56	60	51	36	42	30	28	39	40	47	50	56	37	46	49	38	35	60	56	46	58
ENSG00000009830	63	43	57	56	55	34	45	38	79	80	71	75	69	56	56	51	82	76	80	68	43	43	42	48	81	63	70	66	67	46	56	61	60	76	73	77	43	42	47	47	60	75	55	52	62	46	63	64
ENSG00000009844	226	231	185	205	175	193	183	171	158	128	152	154	178	165	184	192	160	142	147	149	164	162	169	167	144	145	140	138	183	174	206	191	177	191	206	187	181	130	167	169	167	157	172	161	162	166	203	204
ENSG00000009950	0	1	0	0	1	2	1	1	1	0	0	0	0	0	0	0	0	0	0	1	1	0	0	1	1	3	0	0	1	0	2	0	2	1	0	0	0	1	1	0	0	0	0	1	1	0	0	0
ENSG00000009954	1696	1591	1698	1653	1504	1506	1413	1494	1341	1273	1363	1333	1412	1318	1495	1411	1477	1386	1396	1395	1404	1407	1428	1384	1340	1189	1292	1329	1462	1458	1431	1412	1556	1477	1473	1438	1497	1401	1394	1359	1228	1233	1289	1280	1472	1356	1388	1381
ENSG00000010017	343	357	359	342	401	344	419	348	293	268	311	280	277	284	296	293	289	262	270	271	322	313	349	306	285	318	261	274	302	308	367	305	341	305	312	321	325	322	317	313	297	285	282	297	321	285	277	296
ENSG00000010030	5	3	3	1	3	5	8	2	7	11	9	6	9	10	1	8	6	4	6	7	7	8	7	1	4	3	8	5	7	5	4	12	8	7	11	7	2	11	5	5	6	4	2	5	4	5	6	10
ENSG00000010072	35	32	42	36	27	32	27	35	23	18	21	30	27	22	31	24	21	34	22	20	28	29	25	22	22	21	19	23	35	27	24	23	28	25	36	25	34	45	35	39	24	24	32	21	32	27	38	35
ENSG00000010165	120	129	122	114	140	112	123	124	166	159	179	146	177	135	144	154	155	171	173	165	118	122	133	119	142	152	133	125	161	146	128	161	99	128	145	138	156	129	113	123	134	122	126	135	141	142	165	160
ENSG00000010219	15	23	14	19	20	15	9	16	14	17	20	17	17	21	14	16	11	14	15	15	15	16	18	12	12	13	17	10	21	12	11	17	22	10	10	13	15	17	10	19	10	13	13	11	8	10	24	16
ENSG00000010244	684	724	742	687	537	557	571	523	568	528	559	608	577	506	568	542	576	552	596	611	544	526	542	536	602	582	648	611	645	623	651	619	625	591	663	579	510	474	559	505	570	574	567	585	594	580	608	596
ENSG00000010256	287	261	296	250	213	253	256	236	430	434	452	432	441	395	456	437	451	412	439	424	296	328	305	329	379	402	393	389	392	339	382	340	290	305	347	313	261	253	261	259	339	332	301	371	391	395	410	374
ENSG00000010270	49	44	55	44	57	70	61	46	37	44	36	34	46	50	53	52	37	31	43	35	56	40	52	61	40	47	44	37	56	46	56	39	31	49	51	38	50	55	52	35	46	40	26	40	47	41	47	31
ENSG00000010278	739	734	773	765	695	646	668	655	907	866	848	872	893	818	896	869	842	822	830	833	768	681	728	711	883	829	913	842	816	763	834	788	737	687	719	723	577	580	594	603	784	800	760	749	801	779	841	830
ENSG00000010282	0	0	0	0	0	0	0	0	0	0	0	0	0	0	0	0	0	0	0	1	0	0	0	0	0	0	0	1	0	0	0	0	0	0	0	0	0	0	0	0	0	0	0	0	0	0	0	0
ENSG00000010292	1182	1159	1210	1154	918	923	975	882	1451	1393	1484	1404	1211	1241	1225	1230	1478	1370	1364	1397	1063	956	1058	977	1393	1290	1371	1350	1220	1179	1229	1206	1109	1074	1150	1053	911	893	924	921	1112	1178	1219	1172	1245	1196	1269	1149
ENSG00000010295	64	58	61	69	58	63	48	62	78	68	96	67	83	71	81	89	88	68	93	78	73	63	79	79	74	73	74	65	81	58	83	88	81	73	79	79	73	57	75	73	67	64	72	75	90	65	77	77
ENSG00000010310	2	1	4	4	5	2	2	0	2	4	3	2	4	1	1	6	3	0	0	3	7	6	3	6	4	0	3	3	0	1	2	0	1	2	0	1	1	1	4	2	3	3	5	3	2	4	5	0
ENSG00000010318	51	29	38	52	40	34	35	28	35	47	46	40	38	34	37	40	43	25	29	35	31	30	37	37	45	44	53	37	41	44	55	33	49	35	39	40	20	33	37	35	43	44	43	53	40	37	33	29
ENSG00000010319	33	32	38	35	32	25	33	33	41	58	52	39	42	59	41	39	69	52	56	49	29	39	36	19	53	32	50	42	47	43	40	35	50	43	47	52	41	28	23	40	37	59	42	53	50	47	57	39
ENSG00000010322	257	270	275	228	260	259	237	266	459	489	493	449	360	351	382	376	475	412	440	394	308	297	341	318	442	481	442	439	306	330	352	322	316	298	357	292	305	292	299	282	373	392	398	346	379	353	397	388
ENSG00000010327	0	0	1	0	0	1	2	1	0	2	1	0	0	2	0	0	2	2	0	0	0	0	1	1	2	2	1	0	1	0	0	0	1	1	0	1	2	1	2	0	2	1	1	0	0	2	0	2
ENSG00000010361	37	40	30	31	36	39	30	39	57	58	70	81	61	56	68	48	48	68	76	48	50	49	62	36	57	52	54	48	71	60	66	51	48	51	49	42	49	38	55	42	50	53	52	45	66	53	50	68
ENSG00000010379	25	15	26	23	70	40	47	53	23	22	27	27	27	25	20	19	25	29	31	21	83	88	72	80	34	28	30	39	36	33	38	36	30	33	25	36	83	91	111	81	32	19	14	18	35	36	33	26
ENSG00000010404	124	119	117	113	92	115	114	99	102	106	120	101	70	77	93	80	105	99	78	114	104	108	104	115	120	112	120	122	122	108	107	97	122	104	137	104	98	92	102	97	112	117	127	122	107	91	114	110
ENSG00000010438	0	0	1	0	0	0	0	0	0	0	0	0	0	0	0	0	0	0	0	1	0	0	0	0	0	0	0	0	0	1	0	0	0	0	0	0	0	0	0	1	0	0	0	0	0	0	0	0
ENSG00000010539	77	69	85	64	78	66	78	74	60	64	62	55	50	59	66	66	70	58	65	53	76	83	84	63	52	50	49	44	68	50	45	66	60	54	70	65	73	63	59	84	57	42	60	54	73	65	58	56
ENSG00000010610	0	0	0	0	0	0	0	0	0	0	0	0	0	0	0	0	0	0	0	0	0	0	0	0	0	0	0	0	0	0	0	0	0	0	0	0	0	0	0	0	0	0	0	0	0	0	0	0
ENSG00000010626	15	22	27	21	14	18	13	20	23	19	28	23	24	28	26	22	32	20	23	24	15	19	11	17	27	19	31	37	25	14	28	19	21	17	18	19	11	15	15	14	27	15	19	20	33	20	20	23
ENSG00000010671	522	512	528	511	487	448	503	441	456	391	423	392	479	441	443	443	431	454	464	453	458	406	427	447	501	512	488	468	447	449	468	439	436	442	451	459	409	367	374	393	483	412	386	423	442	462	456	424
ENSG00000010704	8	6	7	4	6	6	6	6	4	5	5	4	4	2	3	7	2	8	6	4	5	5	11	9	6	5	6	7	3	3	5	2	1	3	3	6	8	5	7	6	5	5	4	7	5	8	4	3
ENSG00000010803	185	153	162	185	155	132	156	140	222	200	237	206	204	181	212	203	206	216	229	174	176	168	165	161	232	187	223	208	197	179	185	180	162	174	191	178	168	173	176	161	164	187	173	184	215	176	217	210
ENSG00000010810	143	109	139	138	160	152	119	132	166	160	150	116	121	120	138	116	150	159	170	158	110	145	122	140	163	153	160	159	136	129	119	144	147	138	149	134	117	136	136	144	156	163	157	142	126	121	139	121
ENSG00000010818	621	591	661	611	685	669	762	676	669	670	688	595	672	594	609	621	683	668	609	681	694	674	689	639	646	600	590	593	637	567	603	598	585	557	628	539	677	628	698	640	607	592	622	599	639	668	688	662
ENSG00000010932	1	0	0	0	0	0	1	1	0	0	0	1	0	0	0	1	0	0	0	0	0	1	0	2	0	0	0	1	1	0	0	0	0	2	0	1	0	1	0	1	1	0	0	0	1	0	0	0
ENSG00000011007	171	164	186	159	145	147	159	166	182	151	147	148	168	151	159	149	175	171	167	180	161	160	142	144	147	145	156	150	195	159	163	160	185	193	200	188	193	179	173	179	159	156	161	151	190	197	172	170
ENSG00000011009	91	74	93	81	67	78	77	75	149	129	144	116	130	146	122	129	134	118	140	155	129	104	91	120	128	140	111	118	129	114	140	111	125	111	108	93	107	103	103	96	100	100	115	93	130	120	137	130
ENSG00000011021	135	120	159	135	91	99	74	97	177	175	162	175	126	124	115	135	197	162	173	154	103	119	132	118	162	187	193	169	103	110	111	116	151	135	139	152	87	86	89	73	152	173	138	153	120	116	127	107
ENSG00000011028	55	64	59	72	122	124	125	112	126	138	153	134	126	121	132	125	131	139	143	116	194	180	189	191	132	128	135	123	129	152	129	123	95	81	111	101	166	147	182	170	123	112	115	133	152	140	158	132
ENSG00000011052	0	0	0	1	0	1	1	0	2	3	2	3	1	0	2	0	2	2	2	0	1	4	3	3	1	5	1	2	1	1	1	2	0	4	2	1	2	0	0	0	0	0	0	2	0	4	5	2
ENSG00000011083	0	0	0	0	0	0	0	0	0	0	0	0	0	0	0	0	0	0	0	0	0	0	0	0	0	0	0	0	0	0	0	0	0	0	0	0	0	0	0	0	0	0	0	0	0	0	0	0
ENSG00000011105	5	1	2	0	1	3	6	4	1	2	0	3	3	6	2	3	0	1	3	1	7	6	2	4	3	2	4	1	2	1	1	1	4	1	2	1	7	4	4	3	3	4	0	3	2	2	2	1
ENSG00000011114	205	196	223	193	177	169	172	174	154	158	152	138	153	158	139	139	153	174	160	161	149	147	168	142	157	146	114	135	146	169	164	158	172	205	191	216	179	176	174	160	147	155	159	154	175	182	136	158
ENSG00000011132	27	27	28	34	20	27	24	32	54	46	59	51	48	50	48	46	64	49	60	52	43	39	30	36	57	45	49	51	48	38	38	41	49	43	44	49	29	35	29	40	44	45	31	42	59	43	40	39
ENSG00000011143	62	49	64	53	61	65	65	63	90	79	80	71	79	72	61	70	80	77	74	87	62	65	75	54	86	68	97	68	76	69	64	84	52	54	68	64	64	57	63	57	78	71	76	75	84	70	61	76
ENSG00000011198	19	19	24	22	17	21	26	18	20	13	10	16	16	18	13	16	20	24	8	20	16	15	10	17	20	10	16	9	17	16	25	10	21	38	26	21	17	23	10	11	21	16	22	10	17	17	21	15
ENSG00000011201	0	0	0	0	0	0	0	0	0	0	0	0	0	0	0	0	0	0	0	0	0	0	0	0	0	0	0	0	0	0	0	0	0	0	0	0	0	0	0	0	0	0	0	0	0	0	0	0
ENSG00000011243	150	137	126	151	147	122	153	130	224	185	206	191	165	185	202	193	204	205	204	187	163	149	174	148	195	202	189	205	191	166	183	159	163	140	145	144	134	139	159	144	163	180	174	170	189	165	195	176
ENSG00000011258	308	329	309	297	253	276	300	268	266	206	219	218	261	251	248	254	216	223	244	213	244	261	259	250	277	245	233	249	279	259	288	290	235	280	236	272	255	213	255	246	271	247	286	236	266	238	252	276
ENSG00000011260	224	222	234	233	196	167	178	174	194	152	172	167	201	194	194	188	160	182	209	163	165	162	153	152	168	159	176	182	230	214	214	204	200	240	223	224	186	171	183	164	186	184	193	182	209	173	189	186
ENSG00000011275	132	128	128	126	116	117	116	125	146	142	158	154	126	140	150	132	176	161	163	150	131	120	137	149	153	160	169	162	161	142	139	134	137	151	151	137	168	139	122	128	161	135	125	139	152	138	137	141
ENSG00000011295	188	191	200	186	159	152	147	170	154	138	139	152	139	145	153	137	164	156	149	154	153	133	155	159	184	171	147	151	166	159	166	170	199	179	198	177	156	158	151	181	163	157	184	168	161	161	165	146
ENSG00000011304	1287	1239	1318	1215	1006	949	935	936	1855	1703	1733	1708	1623	1465	1541	1509	1795	1635	1790	1642	1292	1153	1198	1199	1470	1411	1438	1395	1523	1517	1604	1485	1500	1537	1558	1655	1196	1183	1247	1190	1473	1439	1435	1388	1534	1554	1513	1478
ENSG00000011332	4	4	6	1	7	7	4	7	9	9	5	3	5	3	3	3	8	9	7	5	4	6	4	5	5	4	6	5	5	6	0	4	5	6	7	4	2	4	5	4	8	7	7	6	8	5	6	7
ENSG00000011347	0	0	0	0	0	0	0	0	0	0	0	0	0	0	0	0	0	0	0	0	0	0	0	0	0	0	0	0	0	0	0	0	0	0	1	0	0	0	0	0	0	0	0	0	0	0	0	1
ENSG00000011376	107	111	107	97	82	81	98	85	124	115	104	115	140	118	114	96	150	128	120	101	109	95	126	101	109	97	109	104	124	116	128	117	114	121	117	107	112	109	99	112	101	96	92	118	140	106	126	117
ENSG00000011405	134	150	108	135	149	159	156	157	96	88	93	89	97	91	113	104	102	101	101	89	162	146	153	154	96	104	109	109	102	110	118	111	96	80	124	120	125	130	141	131	86	83	96	104	105	118	123	100
ENSG00000011422	44	53	45	41	88	60	88	71	84	67	69	75	74	77	72	63	76	61	67	64	126	106	115	116	71	81	68	76	78	62	83	71	70	48	48	50	110	120	114	105	47	55	59	52	68	64	89	82
ENSG00000011426	121	116	121	117	129	132	138	118	105	104	105	94	107	94	118	97	89	97	101	80	140	129	123	126	94	82	95	82	100	82	86	107	93	98	92	85	123	115	137	119	91	89	98	90	110	110	118	129
ENSG00000011451	150	141	156	139	105	110	91	154	215	205	217	206	208	181	192	183	224	192	231	222	162	145	174	149	194	197	212	200	198	205	181	187	179	153	207	167	159	142	170	168	170	150	160	160	198	175	191	185
ENSG00000011454	171	174	181	179	162	152	155	196	156	152	145	127	147	144	145	141	153	149	156	168	150	156	177	150	172	147	146	144	153	157	151	163	137	151	143	155	127	128	161	137	148	138	152	139	156	175	167	157
ENSG00000011465	0	0	0	0	0	0	0	1	0	0	0	0	0	0	0	0	0	0	0	0	0	0	0	0	0	0	0	0	0	0	0	0	0	0	0	0	0	0	0	0	0	0	0	0	0	0	0	0
ENSG00000011478	56	82	74	84	77	97	90	90	127	109	120	131	108	89	114	87	113	128	131	130	121	114	118	114	114	107	117	133	111	82	105	104	97	89	92	104	119	87	103	118	96	94	108	96	122	105	126	101
ENSG00000011485	305	311	303	322	257	246	275	257	447	426	402	444	431	415	451	446	436	414	426	442	304	310	330	308	417	414	398	418	434	388	410	409	327	356	342	402	329	320	323	305	384	340	370	354	452	387	423	405
ENSG00000011523	194	195	194	177	222	192	214	188	217	192	202	197	213	249	225	200	233	223	226	225	235	223	218	216	203	217	232	228	220	221	195	181	216	179	203	199	233	192	219	222	201	199	217	188	223	193	243	204
ENSG00000011566	42	40	37	56	45	44	46	47	26	27	35	35	36	35	30	28	26	35	27	29	29	43	34	39	27	38	29	34	29	39	37	38	31	38	34	37	37	48	52	41	25	26	38	31	33	32	41	25
ENSG00000011590	2	1	2	2	3	2	0	1	5	3	3	2	4	3	2	0	3	5	1	2	4	4	1	2	3	1	6	1	3	4	0	1	4	4	8	1	2	1	1	2	5	0	2	0	0	2	1	4
ENSG00000011600	0	0	0	0	0	0	0	0	0	0	0	0	0	0	0	0	0	0	0	0	0	0	0	0	0	0	0	0	0	0	0	0	0	0	0	0	0	0	0	0	0	0	0	0	0	0	0	0
ENSG00000011638	54	59	67	46	61	58	63	58	68	70	67	71	45	38	47	58	55	48	66	68	52	50	45	58	57	58	77	57	55	51	40	42	68	67	69	65	49	58	63	54	69	49	63	64	61	40	54	45
ENSG00000011677	2	0	1	0	2	1	1	3	2	1	2	0	0	0	0	0	2	0	1	1	0	2	2	0	0	0	0	6	0	1	2	1	2	1	1	1	1	3	0	1	1	2	1	0	0	0	0	0
ENSG00000012048	445	459	453	452	553	515	540	537	348	355	432	362	413	386	407	409	351	347	330	386	496	513	508	510	446	361	374	377	462	466	470	454	365	349	344	364	477	478	489	473	340	333	352	338	454	420	443	412
ENSG00000012061	108	92	113	111	97	109	87	105	140	150	183	148	141	143	141	160	168	149	169	181	142	128	119	112	160	164	168	147	148	145	150	160	145	138	162	137	119	104	118	109	154	124	146	122	162	153	162	142
ENSG00000012124	446	451	442	371	377	373	414	388	614	582	616	582	461	446	453	459	619	571	612	588	477	444	486	463	600	574	627	603	428	422	432	423	427	433	465	443	374	352	379	360	509	477	493	497	484	486	517	450
ENSG00000012171	4	4	5	3	6	8	8	4	17	10	8	10	13	7	8	9	13	14	13	14	11	10	5	5	16	17	13	6	6	9	9	10	12	5	11	11	5	9	10	11	11	4	15	11	4	7	19	9
ENSG00000012174	88	83	89	88	62	63	69	61	54	64	74	61	63	65	70	53	68	42	76	65	74	46	78	69	52	69	74	59	73	70	58	74	78	74	64	89	77	70	72	60	64	58	65	59	63	57	66	63
ENSG00000012211	16	23	17	24	21	17	22	10	40	39	33	37	18	18	31	21	34	28	21	34	24	32	24	24	32	21	32	38	15	17	28	24	27	23	18	17	24	19	20	16	22	31	32	25	21	34	17	22
ENSG00000012223	1	0	0	0	0	0	0	0	0	0	0	0	0	0	1	0	0	0	1	0	0	0	1	0	2	0	0	0	0	0	0	0	1	0	0	0	0	0	0	0	0	1	0	0	0	0	0	0
ENSG00000012232	129	146	146	156	118	87	120	111	157	171	151	155	161	161	153	156	218	159	198	166	146	109	122	119	142	133	138	154	148	158	163	159	161	167	147	160	129	104	129	144	161	160	147	127	140	156	139	168
ENSG00000012504	0	0	0	0	0	0	0	0	0	0	0	0	0	0	0	0	0	0	0	0	0	0	0	0	0	0	0	0	0	0	0	0	0	0	0	0	0	0	0	0	0	0	0	0	0	0	0	0
ENSG00000012660	675	642	663	654	586	549	603	585	468	442	516	502	525	511	542	568	523	478	491	520	565	540	561	561	501	469	477	465	589	545	572	499	607	566	637	571	583	532	551	526	490	508	519	491	509	529	511	509
ENSG00000012779	0	1	2	0	2	3	1	1	1	2	0	2	3	1	4	0	3	1	0	1	1	2	1	1	0	3	2	2	2	0	1	0	1	0	1	1	2	2	1	2	0	0	0	0	1	0	0	1
ENSG00000012817	0	0	0	0	0	0	0	0	1	0	0	0	0	0	0	0	0	0	0	0	0	0	0	0	0	0	0	0	0	0	0	0	0	0	0	0	0	0	0	0	0	0	0	0	0	0	0	0
ENSG00000012822	113	106	135	95	118	106	142	126	195	180	186	182	161	150	168	145	187	183	183	173	140	159	135	124	202	224	242	168	134	139	178	144	123	120	111	99	102	111	106	97	166	182	160	171	162	143	179	139
ENSG00000012963	275	307	312	289	296	272	298	308	209	233	237	223	270	242	240	256	239	235	263	215	288	284	265	286	246	218	258	219	284	242	297	267	272	261	267	266	296	248	260	245	219	242	251	236	278	267	277	271
ENSG00000012983	136	134	140	118	99	94	97	81	94	85	65	73	82	84	76	78	83	83	63	85	95	81	95	86	99	92	89	84	107	88	96	74	121	108	107	106	91	78	66	97	110	82	76	82	90	80	94	78
ENSG00000013016	0	3	1	2	3	2	2	4	2	3	3	2	3	3	0	1	2	0	2	0	3	4	5	1	2	4	1	2	1	1	2	1	2	5	3	4	4	5	2	5	0	1	3	3	5	1	1	3
ENSG00000013275	130	150	119	137	108	98	95	108	155	137	141	149	139	135	167	135	166	158	165	194	136	122	123	92	138	132	149	132	155	169	153	143	134	125	142	130	111	143	113	129	109	124	113	125	138	158	134	165
ENSG00000013288	68	63	76	81	64	56	78	76	107	108	118	101	79	100	99	84	107	123	114	94	105	81	99	88	97	106	84	89	110	67	83	99	89	77	98	94	101	91	92	96	82	96	99	92	99	97	92	113
ENSG00000013293	0	1	1	0	1	0	1	2	1	0	0	2	0	0	0	0	1	1	0	0	0	2	0	0	0	1	0	0	0	0	1	1	0	0	2	1	1	1	2	0	0	0	1	2	0	0	0	1
ENSG00000013297	2	3	2	1	0	3	2	2	2	1	2	3	2	1	3	0	2	3	1	3	3	2	3	1	3	3	5	4	0	2	1	1	3	3	3	2	4	1	4	2	1	4	5	1	2	4	0	6
ENSG00000013306	201	154	197	179	222	175	177	186	288	309	281	274	315	264	307	280	301	300	274	277	278	296	274	260	245	237	277	215	265	296	278	269	233	265	250	234	233	235	240	234	228	212	210	191	288	295	337	289
ENSG00000013364	16	8	13	11	15	21	9	9	39	28	32	30	33	27	37	30	25	34	32	32	18	24	17	26	39	37	29	26	16	25	20	23	25	20	15	16	23	22	23	20	24	26	23	28	31	24	28	24
ENSG00000013374	288	243	297	265	265	272	269	259	241	233	230	250	273	213	270	253	231	236	226	243	275	248	284	240	260	229	272	220	262	218	249	233	265	235	267	226	269	246	270	233	228	234	241	222	272	214	202	232
ENSG00000013375	89	78	109	79	71	65	67	62	97	74	66	64	79	67	66	55	64	72	67	60	64	68	70	82	86	70	80	66	79	86	76	74	70	70	70	66	51	65	55	52	65	72	67	79	73	84	71	85
ENSG00000013392	12	7	18	13	19	16	12	13	23	16	8	7	17	12	14	9	12	11	12	16	10	13	18	16	11	9	18	13	9	8	8	14	11	12	17	15	12	9	9	12	23	9	11	10	8	9	11	13
ENSG00000013441	353	355	344	308	282	276	270	292	258	238	226	230	249	254	249	244	277	235	272	267	337	317	304	292	148	150	202	173	174	175	189	205	251	242	207	210	230	230	227	211	199	199	191	201	203	209	221	206
ENSG00000013503	48	58	68	65	38	37	34	42	33	47	38	52	50	32	63	42	56	48	47	51	35	37	43	49	44	45	33	30	48	50	47	49	58	55	51	50	56	39	53	36	35	52	34	52	57	51	42	44
ENSG00000013523	111	100	129	78	112	114	112	121	130	123	141	124	125	124	115	101	144	151	130	154	105	114	121	83	120	117	145	107	127	129	120	122	138	102	133	134	114	106	97	115	136	108	118	122	139	129	116	132
ENSG00000013561	89	107	120	100	72	103	95	93	84	76	62	76	82	85	79	69	71	80	67	67	85	75	94	96	72	61	57	64	67	65	70	75	109	86	104	97	83	80	87	87	92	79	83	87	85	89	75	67
ENSG00000013563	18	6	16	11	20	18	9	18	21	17	17	23	21	25	18	24	21	22	25	17	26	25	24	23	16	30	22	18	24	24	31	19	17	22	14	23	16	25	21	24	17	23	31	20	24	20	25	19
ENSG00000013573	354	321	341	350	336	340	373	351	495	533	541	549	429	398	465	427	538	544	518	523	410	348	416	389	515	495	534	437	406	407	406	392	344	332	392	343	331	346	325	352	377	417	392	386	441	438	452	442
ENSG00000013583	44	32	35	44	34	35	35	28	35	43	45	38	35	34	33	33	40	29	42	40	37	36	47	37	41	38	36	39	29	36	30	41	44	33	35	36	35	41	29	28	52	40	41	41	35	28	28	38
ENSG00000013588	0	0	0	0	0	0	0	1	0	0	0	1	0	0	0	1	0	1	0	0	0	0	0	0	0	0	0	0	0	0	0	1	0	0	0	0	0	0	0	0	0	0	0	0	0	0	0	0
ENSG00000013619	0	0	0	0	0	0	0	0	0	0	0	0	0	0	1	0	0	0	0	0	0	0	1	0	0	0	0	0	0	0	0	0	0	0	0	0	0	1	0	1	0	0	0	0	0	0	0	0
ENSG00000013725	0	1	1	0	1	0	1	4	0	2	0	2	2	2	1	0	5	1	0	2	4	4	1	1	2	1	1	1	1	3	1	0	0	0	2	1	0	2	1	4	0	2	0	3	1	0	2	2
ENSG00000013810	321	304	298	302	266	278	259	278	423	411	468	410	486	430	441	439	452	423	449	443	340	353	349	336	430	395	423	409	482	422	416	454	402	329	387	371	391	346	378	337	392	338	386	363	451	477	447	484
ENSG00000014123	158	175	182	177	151	128	181	146	136	120	139	143	110	117	146	114	129	130	120	123	165	124	142	160	148	138	150	119	118	120	141	130	164	149	143	158	136	141	144	137	147	141	128	125	151	150	143	127
ENSG00000014138	157	157	167	159	139	134	147	143	183	184	164	149	177	141	145	174	160	155	163	170	174	156	160	151	163	141	163	159	166	161	191	147	164	129	151	157	154	147	120	154	137	167	129	129	160	187	154	174
ENSG00000014164	72	72	69	65	57	56	50	47	120	106	136	108	102	97	93	85	125	117	136	113	78	65	66	65	108	111	99	88	98	93	101	107	84	91	93	91	82	91	75	80	103	84	103	114	113	86	99	93
ENSG00000014216	260	253	246	246	239	244	265	242	496	478	468	522	427	431	428	396	431	432	486	451	348	356	347	366	408	360	455	410	400	365	402	371	322	287	351	327	323	327	304	315	358	343	387	350	452	423	392	396
ENSG00000014257	0	0	0	0	1	0	0	3	0	0	0	0	0	0	0	0	0	0	0	1	5	2	2	1	0	0	0	0	0	0	1	0	0	0	2	2	3	1	2	2	0	0	0	0	3	0	1	1
ENSG00000014641	306	305	328	334	351	289	369	327	261	260	281	256	348	352	327	346	268	257	270	246	348	325	332	362	283	257	268	250	329	322	338	342	314	277	272	276	322	311	364	309	273	267	247	251	313	317	324	357
ENSG00000014824	108	86	113	106	100	94	118	88	67	62	74	62	89	66	85	97	63	75	59	54	82	90	88	90	77	68	77	84	82	95	103	96	84	61	77	79	81	89	98	84	71	73	64	82	83	72	76	77
ENSG00000014914	0	0	0	0	1	0	2	0	0	0	0	1	0	1	0	1	0	0	0	0	1	0	0	1	0	0	0	0	0	0	1	0	0	0	0	2	0	1	0	0	1	0	0	0	0	0	0	0
ENSG00000014919	184	171	189	192	151	156	144	157	166	175	201	166	146	178	183	170	168	158	153	179	154	150	153	166	198	191	219	163	190	186	154	205	180	176	178	174	135	155	129	157	175	170	158	165	189	154	155	168
ENSG00000015133	157	141	168	157	133	122	134	148	254	195	227	235	200	182	204	196	217	233	217	220	180	147	170	159	195	204	198	189	197	166	169	173	201	196	160	195	157	139	196	188	182	205	180	183	216	168	202	184
ENSG00000015153	53	53	61	48	43	43	33	36	37	32	31	32	44	38	42	48	47	32	29	33	40	51	25	42	29	27	43	36	40	45	42	51	51	61	57	54	49	45	48	40	55	40	38	41	45	35	47	46
ENSG00000015171	139	145	177	141	125	110	114	118	110	104	112	115	103	97	112	104	99	93	100	98	95	87	105	99	128	102	91	118	107	124	114	106	128	127	130	145	121	116	103	112	97	91	99	96	127	113	111	101
ENSG00000015285	177	183	164	141	135	147	146	147	257	285	301	297	267	253	267	226	254	256	295	277	208	183	203	174	256	253	266	235	202	231	226	233	196	187	211	207	182	167	182	177	228	240	234	225	236	233	243	244
ENSG00000015413	4	1	4	1	7	11	6	7	16	4	13	13	8	7	6	11	9	4	10	6	9	11	9	14	11	6	11	15	6	8	9	7	2	1	2	3	10	5	9	8	6	6	12	4	7	8	6	1
ENSG00000015475	180	184	183	179	168	193	168	172	223	209	232	226	272	230	280	246	209	215	227	241	226	191	217	203	218	196	223	200	235	203	238	220	216	214	200	204	214	195	193	200	214	193	207	169	257	236	238	238
ENSG00000015479	1824	1659	1871	1832	1326	1380	1408	1329	1166	1124	1188	1163	1455	1384	1489	1353	1240	1165	1177	1190	1382	1268	1310	1383	1185	1155	1265	1179	1651	1553	1562	1595	1610	1478	1554	1491	1314	1324	1364	1268	1235	1231	1248	1265	1538	1397	1389	1421
ENSG00000015520	0	0	0	0	1	0	0	0	1	0	0	1	2	1	0	0	0	0	0	0	0	1	0	0	1	1	0	0	0	0	0	1	0	0	0	0	0	0	0	0	1	1	1	1	1	0	0	0
ENSG00000015532	65	75	82	68	44	55	46	56	138	119	121	128	117	112	101	107	118	119	146	127	80	99	95	81	131	138	121	121	78	101	85	95	102	86	106	106	60	60	79	64	115	91	93	116	99	93	87	100
ENSG00000015568	4	0	5	3	1	2	2	3	0	2	1	1	0	1	0	1	2	1	1	2	0	1	2	2	0	1	1	1	2	1	1	0	1	0	0	0	1	1	1	2	1	2	2	2	1	1	0	1
ENSG00000015592	0	0	0	0	0	0	0	0	0	0	0	0	0	0	0	0	0	0	0	0	0	0	0	0	0	0	0	0	0	1	0	0	0	0	0	0	0	0	0	0	0	0	0	0	0	0	0	0
ENSG00000015676	80	101	112	103	73	91	78	95	154	126	132	115	124	128	152	127	140	124	154	148	102	84	107	105	123	141	146	123	123	139	131	127	90	108	111	103	96	93	84	75	133	115	122	112	162	124	135	122
ENSG00000016082	0	0	0	0	0	0	0	0	0	0	0	0	0	0	0	0	0	0	0	0	0	0	0	0	0	0	0	0	0	0	0	0	0	0	0	0	0	0	0	0	0	0	0	0	0	0	0	0
ENSG00000016391	0	0	0	2	1	0	0	2	0	1	1	2	1	2	0	0	3	0	2	2	2	0	1	2	0	1	2	1	1	2	1	0	2	3	1	2	1	0	0	2	1	0	0	1	0	1	0	1
ENSG00000016402	0	0	0	0	0	0	0	0	0	0	0	0	0	0	0	0	0	0	0	0	0	0	0	0	0	0	0	0	0	0	0	0	0	0	0	0	0	0	0	0	0	0	0	0	0	0	0	0
ENSG00000016490	0	0	0	0	0	0	0	0	0	0	0	0	0	0	0	0	0	0	0	0	0	0	0	0	0	0	0	0	0	0	0	0	0	0	0	0	0	0	0	0	0	0	0	0	0	0	0	0
ENSG00000016602	0	0	0	0	0	0	0	0	0	0	0	0	0	0	0	0	0	0	0	0	0	0	0	0	0	0	0	0	0	0	0	0	0	0	0	0	0	0	0	0	0	0	0	0	0	0	0	0
ENSG00000016864	115	143	140	133	114	109	112	128	104	104	118	112	123	113	115	109	104	96	102	105	120	103	98	126	133	119	110	107	141	114	133	152	130	115	115	118	117	126	111	114	124	109	122	119	107	115	119	113
ENSG00000017260	294	264	333	282	405	420	428	371	223	236	238	206	289	245	266	254	220	232	232	241	348	348	365	325	262	240	232	252	316	290	254	317	300	284	295	309	408	338	355	310	244	227	255	278	292	278	271	313
ENSG00000017427	0	0	0	0	0	0	0	0	0	0	0	0	0	0	0	0	0	0	0	0	0	0	0	0	0	0	0	0	0	0	1	0	0	0	0	0	0	0	0	0	0	0	0	0	1	0	0	1
ENSG00000017483	134	131	114	148	111	123	97	133	214	179	245	216	185	182	171	189	213	225	233	224	148	124	135	135	180	158	171	182	178	179	173	177	165	149	135	160	159	132	134	125	144	162	157	145	177	165	210	212
ENSG00000017797	743	733	701	751	631	605	687	605	731	741	720	697	685	642	722	706	717	699	755	663	651	621	635	649	647	675	714	691	708	645	725	679	714	727	730	673	605	659	675	622	733	737	730	719	730	670	656	698
ENSG00000018189	117	101	84	80	110	99	89	86	81	72	71	63	63	67	54	65	77	59	71	59	85	79	83	88	62	64	70	68	83	92	97	78	91	59	72	73	91	84	77	92	65	67	72	72	60	54	67	72
ENSG00000018236	0	0	0	0	0	0	0	0	0	0	0	0	0	0	0	0	0	0	1	0	0	0	0	0	0	0	0	0	0	0	0	0	0	0	0	0	0	0	0	0	0	0	0	0	0	0	0	0
ENSG00000018280	0	2	0	1	0	3	0	1	2	0	1	3	3	2	2	2	2	1	1	0	2	2	2	6	1	1	1	3	0	1	2	1	0	2	1	2	1	2	2	2	2	2	0	1	1	2	0	1
ENSG00000018408	0	2	1	1	2	0	1	1	0	0	0	0	2	0	0	1	1	0	0	2	2	1	0	0	0	2	1	0	0	0	1	0	0	1	2	2	2	0	0	1	1	2	0	2	0	0	1	2
ENSG00000018510	312	258	310	274	251	232	279	239	198	188	200	173	200	206	237	171	175	157	185	168	263	228	228	229	190	183	191	185	253	263	256	249	242	247	233	254	253	231	238	238	209	177	225	210	206	204	212	211
ENSG00000018607	0	0	0	0	0	0	0	0	0	0	0	0	0	0	0	0	0	0	0	0	0	0	0	0	0	0	0	0	0	0	0	0	0	0	0	0	0	0	0	0	0	0	0	0	0	0	0	0
ENSG00000018610	65	75	87	75	62	63	64	79	80	55	64	58	78	87	80	82	77	72	80	65	65	69	68	54	56	59	67	70	82	60	73	66	58	77	75	81	71	70	64	59	70	55	70	60	68	70	64	76
ENSG00000018625	0	0	0	0	0	0	0	1	0	0	0	0	0	0	0	0	0	0	0	0	0	0	0	0	0	0	0	0	0	0	0	0	0	0	0	0	0	1	2	0	0	0	0	0	0	0	0	0
ENSG00000018699	106	103	104	98	84	76	79	73	74	73	81	73	68	94	76	93	78	79	91	94	68	63	85	65	79	69	90	69	80	113	73	90	91	95	91	76	76	65	66	69	86	83	90	73	128	91	115	89
ENSG00000018869	1	0	1	0	0	0	1	0	0	0	0	0	0	0	0	0	0	0	1	1	1	1	0	0	0	0	0	0	2	0	0	0	0	0	0	2	0	1	1	0	0	0	0	0	0	0	0	0
ENSG00000019102	3	5	3	2	4	2	3	4	1	2	0	6	3	3	2	5	3	3	3	1	5	3	4	5	2	1	3	3	3	1	5	3	2	1	3	2	8	4	4	11	4	2	1	3	6	2	2	0
ENSG00000019144	4	3	1	4	9	8	9	8	6	3	1	4	5	2	3	5	6	5	7	2	6	10	7	3	7	3	8	4	2	4	2	2	6	2	3	3	12	9	5	7	1	4	6	1	3	4	8	4
ENSG00000019169	0	0	0	0	0	0	0	0	0	0	0	0	0	0	0	0	0	0	0	0	0	0	0	0	0	0	0	0	0	0	0	0	0	0	0	0	0	0	0	0	0	0	0	0	0	0	0	0
ENSG00000019186	0	0	0	0	0	0	0	0	0	0	0	0	0	0	0	0	0	0	0	0	0	0	0	0	0	0	0	0	0	0	0	0	0	0	0	0	0	0	0	0	0	0	0	0	0	0	0	0
ENSG00000019485	26	31	27	37	34	32	33	34	31	37	34	33	38	32	38	30	37	44	41	42	43	37	49	41	33	30	39	24	46	28	33	36	25	39	26	31	40	31	36	35	22	24	33	22	41	40	41	50
ENSG00000019505	0	0	0	0	0	0	0	0	0	0	0	0	0	0	0	0	0	0	0	0	0	0	0	0	0	0	0	1	0	0	0	0	0	0	0	0	0	0	0	0	0	0	0	0	0	0	0	0
ENSG00000019549	0	0	0	0	0	1	0	0	0	0	0	0	0	0	0	1	0	0	0	0	0	0	0	0	0	0	1	0	0	0	0	0	0	0	0	0	0	0	0	0	0	0	0	0	0	0	0	0
ENSG00000019582	1510	1456	1529	1469	2081	1944	2056	1939	2751	2658	2781	2675	2606	2574	2509	2465	2772	2631	2862	2635	2391	2276	2388	2348	2673	2641	2751	2593	2276	2133	2265	2183	1902	1884	1966	1844	2303	2289	2366	2198	2280	2294	2371	2280	2499	2385	2468	2417
ENSG00000019991	0	0	0	1	1	2	1	1	1	0	0	0	0	1	0	0	0	0	0	0	0	1	0	1	0	0	0	0	0	1	0	1	0	0	0	0	0	0	1	0	0	0	0	0	0	0	0	1
ENSG00000019995	79	91	89	88	89	65	87	66	62	64	62	70	65	75	72	79	80	61	75	82	79	56	69	66	80	87	62	82	72	61	76	62	73	67	83	85	54	52	52	79	66	55	95	61	75	73	75	91
ENSG00000020129	56	51	39	53	48	43	42	36	79	99	94	95	56	56	60	71	78	78	97	88	58	60	61	54	92	91	70	65	54	53	59	72	62	55	96	71	72	60	79	62	78	69	62	83	72	75	73	61
ENSG00000020181	4	7	2	1	5	4	6	2	7	4	8	7	1	7	6	4	3	2	3	2	3	5	8	3	4	7	1	5	4	8	2	2	7	3	2	4	4	11	6	8	4	4	3	3	8	4	5	3
ENSG00000020219	0	0	0	1	0	0	0	0	0	1	0	0	0	0	0	0	0	0	0	0	0	0	0	0	0	0	0	1	0	0	0	0	0	1	0	0	1	0	0	0	1	0	0	0	0	0	0	0
ENSG00000020256	83	79	76	77	50	52	61	65	125	98	111	99	92	81	89	72	99	99	109	103	58	50	66	61	93	100	85	104	70	71	89	78	95	83	84	92	74	58	65	51	82	82	83	86	74	90	77	79
ENSG00000020426	28	24	31	20	21	17	21	17	17	16	16	12	27	16	15	18	18	18	19	20	12	21	26	18	14	17	21	25	30	22	21	25	24	29	15	29	16	21	22	20	20	18	30	26	16	17	15	16
ENSG00000020577	34	32	38	38	57	55	43	57	46	41	44	50	50	45	56	42	44	53	51	44	55	54	58	61	57	65	54	60	43	37	47	44	37	32	38	44	57	58	64	42	64	57	45	47	53	40	64	51
ENSG00000020633	7	8	7	16	23	13	14	10	12	15	16	15	21	17	21	13	18	13	23	16	14	22	22	18	17	15	22	13	19	15	19	18	13	15	18	12	8	13	21	11	9	14	19	9	14	14	12	16
ENSG00000020922	328	298	310	293	286	289	285	256	224	218	231	237	241	222	225	217	245	200	234	247	247	259	279	251	270	226	245	249	307	299	288	261	240	276	252	283	263	257	252	261	253	236	256	252	248	273	243	251
ENSG00000021300	6	1	2	5	9	10	9	10	9	3	9	10	1	2	6	7	4	7	6	4	5	15	8	11	4	7	4	5	4	4	7	6	7	3	2	4	4	7	2	7	2	8	4	6	3	8	0	1
ENSG00000021355	119	116	129	109	172	129	161	161	138	136	143	128	122	98	152	113	100	105	134	125	128	131	172	151	128	100	113	108	127	129	120	153	126	121	121	130	157	139	164	156	134	115	135	114	121	105	124	123
ENSG00000021461	2	0	1	0	0	1	2	0	1	0	0	1	0	2	1	0	0	0	0	0	0	0	1	2	0	0	1	0	0	0	0	2	1	1	0	1	0	0	1	0	0	1	1	1	1	0	0	0
ENSG00000021488	0	0	0	0	1	1	0	0	1	1	0	1	0	0	0	2	1	0	0	0	0	1	0	1	1	2	0	1	1	2	2	1	0	0	0	0	1	0	1	0	1	0	0	0	1	0	2	0
ENSG00000021574	136	97	110	120	102	86	91	78	74	74	78	74	62	65	69	54	72	88	87	84	92	85	81	87	94	78	66	71	80	77	93	92	107	116	115	110	85	103	96	79	87	92	103	79	87	68	87	78
ENSG00000021645	3	3	4	1	15	6	7	5	13	8	8	4	3	7	4	1	8	6	8	5	11	10	7	7	8	7	11	4	6	4	2	2	7	4	8	2	5	5	7	6	2	4	6	3	0	3	7	2
ENSG00000021762	30	40	46	47	34	24	31	42	84	67	80	84	60	51	76	60	77	69	83	67	43	50	51	48	56	69	63	81	52	56	46	63	48	55	46	60	44	44	38	49	61	54	61	49	56	61	46	57
ENSG00000021776	255	259	234	242	233	261	242	228	219	187	205	197	226	239	260	225	219	202	190	208	239	227	226	196	197	176	184	180	241	249	242	245	227	218	236	233	230	235	256	229	202	201	183	171	218	215	232	239
ENSG00000021826	15	7	9	7	18	25	28	24	9	10	6	7	17	10	9	17	5	5	12	9	26	17	17	13	10	9	10	7	14	19	5	8	3	12	7	3	20	17	22	21	7	5	5	9	5	11	15	14
ENSG00000021852	0	0	0	0	0	0	0	0	0	0	0	0	0	0	0	0	0	0	0	0	0	0	0	0	0	0	0	0	0	0	0	0	0	0	0	0	0	0	0	0	0	0	0	0	0	0	0	0
ENSG00000022267	272	271	244	226	309	311	317	293	261	242	272	212	355	292	302	304	235	228	271	227	320	299	326	340	268	229	257	223	293	301	291	308	259	235	234	255	292	279	273	284	201	205	225	217	284	292	262	290
ENSG00000022277	197	152	188	188	147	155	176	140	210	184	175	196	215	200	200	220	186	189	204	183	169	182	180	169	171	182	195	217	185	197	184	202	180	175	186	196	175	152	157	143	168	182	171	190	194	174	234	193
ENSG00000022355	1	0	2	0	1	1	0	0	0	1	2	1	2	1	1	0	1	0	1	2	0	0	0	0	0	1	0	2	0	1	1	1	0	0	1	0	0	0	0	0	1	1	0	1	0	0	0	0
ENSG00000022556	0	0	0	1	0	0	1	1	0	0	0	0	0	0	0	1	0	0	0	0	0	0	0	0	0	0	0	0	0	0	0	1	0	0	0	0	0	3	0	0	0	1	0	0	0	0	0	0
ENSG00000022567	26	23	22	21	35	29	30	27	40	36	33	38	28	26	46	36	45	33	39	38	37	32	43	34	35	46	35	38	31	25	25	24	28	37	33	25	41	42	47	43	22	28	31	36	30	41	40	35
ENSG00000022840	336	326	338	312	260	270	290	249	350	361	407	347	307	322	331	320	370	348	367	372	295	285	258	286	335	329	365	319	361	327	375	337	352	358	360	342	256	275	298	305	364	328	323	382	347	346	360	313
ENSG00000022976	32	37	32	27	39	31	41	40	33	26	38	32	48	32	33	38	42	35	39	32	47	43	41	47	35	36	40	38	38	37	40	31	27	48	39	27	38	48	43	51	33	28	33	31	33	34	36	38
ENSG00000023041	184	201	198	194	159	164	174	156	169	148	132	139	150	125	148	131	160	144	156	129	164	153	160	149	141	163	166	145	148	138	154	144	155	169	174	161	140	135	148	140	160	157	139	136	123	145	147	150
ENSG00000023171	29	41	39	37	30	40	39	26	25	21	37	22	33	22	28	24	28	25	38	42	35	33	38	32	32	27	20	20	25	29	23	21	29	41	25	23	38	32	34	23	27	39	32	25	29	23	30	31
ENSG00000023191	174	165	163	161	125	141	123	125	290	302	296	292	299	258	237	254	311	305	299	298	209	187	177	189	269	265	270	262	237	265	237	211	198	207	235	213	185	166	161	165	222	207	236	242	273	241	264	258
ENSG00000023228	418	432	447	411	354	334	358	323	316	278	274	301	338	323	394	321	305	309	298	306	354	310	338	325	327	289	310	286	345	335	368	338	370	398	392	364	343	321	337	323	279	301	285	291	362	344	312	342
ENSG00000023287	520	465	461	438	410	430	458	426	373	336	361	406	369	347	332	339	373	320	338	369	426	404	412	370	373	349	355	333	442	437	444	410	467	437	436	471	476	436	441	383	381	352	386	356	428	374	426	421
ENSG00000023318	139	146	148	129	105	141	111	116	111	93	103	89	126	111	88	128	111	107	105	102	115	109	113	112	115	107	132	106	128	97	110	122	138	117	115	137	114	99	117	125	111	91	120	107	129	106	125	115
ENSG00000023330	89	81	107	92	83	67	76	85	101	92	101	92	96	86	80	82	107	94	90	78	75	73	81	61	102	66	86	108	109	83	89	89	84	91	93	108	80	73	71	77	96	81	104	88	115	81	94	94
ENSG00000023445	0	1	0	1	13	9	15	7	0	0	0	1	0	1	2	1	2	2	0	1	3	3	5	1	0	0	1	0	1	0	4	0	0	0	0	1	7	6	7	4	0	1	1	0	2	3	0	1
ENSG00000023516	214	188	194	201	214	213	235	222	136	129	167	144	170	147	157	168	133	142	162	150	198	180	194	201	162	177	158	156	185	169	181	169	173	170	180	160	170	192	207	191	133	144	167	155	208	179	183	189
ENSG00000023572	25	30	21	33	14	14	23	17	13	13	16	11	14	15	12	10	14	20	15	16	14	25	20	15	12	24	21	21	16	15	19	22	16	32	22	20	11	14	14	15	16	16	18	19	22	13	15	21
ENSG00000023608	46	49	49	30	36	42	32	40	43	40	24	39	33	28	37	33	22	30	35	37	35	39	28	28	32	30	23	32	29	26	29	20	32	38	29	28	20	33	44	27	41	26	39	32	32	27	29	32
ENSG00000023697	110	97	127	110	89	72	128	104	71	90	87	100	98	82	111	86	81	77	86	81	78	80	93	92	76	77	89	87	97	101	99	87	98	95	70	82	98	85	80	88	87	88	89	57	92	94	87	80
ENSG00000023734	355	351	370	338	280	289	318	278	266	262	249	228	245	257	248	246	284	262	264	278	294	281	264	278	267	235	266	217	281	311	293	275	361	345	380	319	315	280	313	305	230	263	268	274	287	272	290	269
ENSG00000023839	6	7	10	9	2	2	5	3	2	7	6	7	5	4	13	5	8	7	4	8	5	10	3	3	5	11	10	6	2	7	4	6	5	1	6	5	1	2	1	5	6	6	10	5	8	9	9	1
ENSG00000023892	159	162	186	192	219	202	204	201	316	336	351	316	311	300	301	268	286	289	308	318	285	292	282	247	330	290	313	317	282	251	300	296	263	220	243	273	260	232	243	232	284	246	311	246	269	285	259	247
ENSG00000023902	157	161	184	170	172	153	155	163	190	178	212	219	239	205	230	245	220	235	243	201	176	184	213	176	172	178	198	197	263	208	202	196	179	173	189	170	184	169	170	196	165	147	199	175	208	211	214	214
ENSG00000023909	59	76	67	66	44	46	55	50	53	34	43	39	45	44	51	48	41	33	45	45	59	50	55	43	50	43	55	32	56	66	47	48	62	66	82	86	59	49	49	56	48	49	54	52	46	44	55	39
ENSG00000024048	238	231	246	225	202	185	203	202	185	196	179	208	183	156	178	176	177	190	205	164	201	169	196	177	200	204	214	193	214	189	194	207	176	195	179	193	185	138	166	164	189	180	174	190	178	188	202	170
ENSG00000024422	1	1	0	0	3	1	0	2	1	0	0	0	2	1	1	0	1	0	2	2	1	2	2	6	2	0	0	1	2	1	1	2	0	0	0	1	2	3	1	2	0	1	1	0	0	2	2	0
ENSG00000024526	193	165	209	181	148	142	131	146	107	112	141	120	124	126	134	144	119	109	107	97	141	113	142	122	102	100	116	114	161	152	154	177	175	150	141	142	133	142	101	123	143	117	136	124	137	132	137	124
ENSG00000024862	63	48	56	68	62	39	75	60	60	57	68	49	46	70	62	54	69	57	77	53	57	48	68	57	59	65	75	63	64	51	53	43	75	61	44	50	51	51	44	54	62	55	68	63	59	62	64	60
ENSG00000025039	90	84	95	96	116	88	105	115	74	82	68	73	84	78	76	78	77	69	75	78	93	102	109	97	84	71	94	76	78	61	69	83	96	84	94	94	111	86	87	68	89	90	79	72	80	64	70	84
ENSG00000025156	107	99	108	103	117	107	105	114	73	81	82	73	98	86	104	77	81	68	68	74	88	97	110	91	77	81	71	73	78	111	110	97	103	87	98	102	84	100	95	82	89	72	72	78	87	99	80	92
ENSG00000025293	241	207	208	208	188	189	181	203	172	175	190	171	164	163	171	170	221	199	178	186	199	200	181	164	186	169	181	208	173	121	174	160	187	181	182	161	172	145	185	176	179	207	180	183	162	182	173	178
ENSG00000025423	7	15	10	11	16	15	15	27	14	17	4	6	11	10	9	15	1	12	18	6	14	10	25	22	12	14	11	10	10	10	8	7	10	11	17	11	14	11	15	14	13	10	11	9	13	14	9	10
ENSG00000025434	13	14	18	18	19	18	18	14	38	26	23	13	22	26	25	27	32	26	33	28	23	22	16	19	26	24	28	27	18	22	17	19	22	21	24	13	20	16	18	18	22	20	21	21	25	24	36	26
ENSG00000025708	3	6	5	5	4	8	10	4	14	8	14	12	7	3	4	2	11	7	8	8	12	9	13	12	9	10	6	6	5	7	4	5	8	6	9	10	5	3	6	3	8	9	7	4	6	4	4	8
ENSG00000025770	194	167	212	170	191	188	219	191	348	321	324	382	298	313	321	337	340	293	326	295	260	270	291	281	310	281	338	290	306	310	290	320	242	198	247	237	246	280	262	233	289	242	290	264	306	343	320	335
ENSG00000025772	82	109	94	109	130	109	114	116	110	126	124	114	123	129	130	122	130	138	132	128	120	101	142	126	115	123	94	123	124	141	158	130	131	98	117	108	137	128	130	119	116	101	91	103	116	125	145	139
ENSG00000025796	438	391	440	413	415	357	365	364	291	272	283	285	309	267	320	282	284	301	300	247	364	342	313	308	318	287	345	315	373	357	324	332	371	346	367	337	324	341	342	334	300	241	314	324	324	311	313	334
ENSG00000025800	294	270	323	287	256	267	259	241	217	220	284	232	250	213	233	251	281	266	286	246	241	244	251	236	254	227	265	250	262	252	251	224	295	258	266	283	267	279	253	252	235	247	259	277	250	237	272	265
ENSG00000026025	1499	1368	1522	1469	1217	1212	1243	1135	1666	1469	1536	1501	1421	1376	1455	1329	1457	1427	1544	1375	1257	1164	1248	1155	1451	1402	1371	1419	1469	1328	1350	1331	1395	1364	1459	1309	1173	1037	1133	1169	1362	1296	1406	1375	1411	1379	1330	1321
ENSG00000026036	11	11	20	23	16	14	9	6	27	36	31	28	17	20	18	33	32	14	34	31	16	26	9	16	37	29	28	22	18	31	26	19	15	21	8	22	15	12	18	10	10	19	21	16	25	13	25	15
ENSG00000026103	17	16	25	23	29	30	43	27	9	12	17	15	21	21	19	18	6	19	24	17	32	25	26	29	11	13	18	14	18	19	24	13	28	19	21	17	38	25	20	24	16	13	15	13	21	11	28	22
ENSG00000026297	152	131	144	160	146	144	151	158	253	221	271	226	176	180	169	165	224	170	228	206	171	167	170	180	240	194	216	202	164	188	162	174	159	171	162	170	120	141	134	118	240	200	190	175	153	150	159	133
ENSG00000026508	368	356	423	365	509	466	461	454	399	393	393	413	441	410	458	447	363	328	376	354	452	438	420	413	387	349	355	365	433	407	444	422	330	321	294	293	404	385	376	360	347	303	357	381	367	419	418	411
ENSG00000026559	10	11	33	20	15	20	18	10	38	24	31	22	12	13	17	13	26	20	19	28	18	18	24	23	18	30	31	22	11	10	21	16	24	26	28	33	13	29	19	15	24	24	24	18	17	20	11	9
ENSG00000026652	37	41	58	40	48	35	55	35	52	50	61	52	50	47	48	64	40	62	50	51	42	46	37	53	74	37	73	50	54	52	51	55	47	54	44	43	45	37	35	58	45	48	45	48	41	37	37	49
ENSG00000026751	0	0	0	0	0	0	0	0	0	0	0	0	0	0	0	0	0	0	0	0	0	1	0	0	0	0	0	0	0	0	0	1	0	0	0	0	0	0	0	1	0	0	0	0	0	0	1	0
ENSG00000026950	101	132	131	114	84	90	89	100	114	134	126	108	122	114	116	95	120	127	121	137	92	83	68	90	141	128	148	148	100	100	111	100	109	111	115	99	73	79	72	78	113	121	122	116	92	103	91	76
ENSG00000027001	44	54	49	55	34	31	26	44	47	29	46	49	51	63	41	44	47	48	45	39	30	27	35	29	34	30	46	42	55	43	38	45	34	59	49	47	38	27	36	26	47	36	48	48	40	34	50	40
ENSG00000027075	42	36	41	40	68	89	77	69	59	45	37	49	60	42	58	65	35	48	36	53	87	75	97	74	46	48	41	49	51	63	56	54	53	32	40	38	63	79	76	86	49	51	33	53	68	62	55	55
ENSG00000027644	1	0	0	1	3	1	1	0	1	0	1	1	1	1	0	2	0	2	0	1	2	3	4	3	5	3	1	3	1	4	1	0	1	1	3	2	1	0	1	2	0	1	5	0	0	1	1	1
ENSG00000027697	64	69	64	67	58	62	63	59	53	57	62	60	48	43	48	39	46	60	56	55	62	55	48	61	44	54	56	53	46	45	51	47	70	80	55	59	60	63	52	50	46	58	57	42	50	70	57	45
ENSG00000027847	55	44	43	44	43	30	34	51	83	76	69	63	52	49	76	60	76	83	78	87	52	51	43	48	76	75	68	71	58	64	47	55	46	61	70	47	46	46	56	47	56	42	54	56	55	63	54	66
ENSG00000027869	43	54	63	54	81	100	97	112	81	87	88	82	85	84	81	93	87	99	104	79	103	101	132	122	92	66	88	88	97	95	81	87	80	63	74	86	126	123	139	121	77	55	63	81	100	84	93	89
ENSG00000028116	57	67	72	67	50	37	50	56	60	45	51	46	48	39	44	45	49	51	44	41	50	39	61	52	57	46	61	42	64	49	69	46	65	63	78	59	47	37	46	57	63	51	58	44	66	37	56	58
ENSG00000028137	26	28	27	34	39	57	52	36	62	56	53	44	52	55	54	49	45	47	44	48	66	62	65	53	53	49	58	53	47	49	40	53	62	46	48	41	66	55	70	54	47	41	51	42	30	44	53	53
ENSG00000028203	206	180	197	191	185	189	189	196	147	147	142	142	173	159	153	170	117	144	147	140	173	157	183	201	146	159	146	142	194	174	194	191	173	156	167	163	166	159	168	171	149	151	137	132	170	154	159	158
ENSG00000028277	17	22	11	17	14	15	21	21	32	39	19	17	24	22	13	20	35	25	30	24	24	27	22	31	16	25	25	13	20	18	17	20	16	14	19	12	30	25	28	19	20	17	21	22	19	21	20	24
ENSG00000028310	176	178	221	183	134	151	152	167	219	224	225	204	191	178	194	183	249	216	252	199	152	163	177	132	227	218	226	204	181	167	198	186	180	203	183	207	170	149	160	161	205	206	191	172	203	203	189	209
ENSG00000028528	421	386	408	414	317	323	324	355	435	365	413	405	399	398	371	369	413	385	422	393	384	363	389	355	445	405	416	403	398	388	420	453	397	342	399	360	372	296	335	314	340	383	336	365	420	388	425	398
ENSG00000028839	58	59	44	62	48	48	39	32	42	37	39	39	38	43	43	55	40	57	43	48	55	61	53	36	37	46	55	32	39	43	43	52	56	51	51	59	47	35	54	49	41	41	47	50	49	34	37	48
ENSG00000029153	21	34	28	29	32	52	37	39	16	15	20	13	18	25	20	18	21	19	17	21	32	41	39	45	19	13	14	19	26	22	22	27	20	21	15	22	47	48	54	36	17	13	19	23	21	21	23	20
ENSG00000029363	549	576	628	546	489	470	533	483	364	389	391	368	475	447	444	497	377	346	391	357	483	448	468	440	399	394	375	372	533	534	573	554	507	512	475	458	523	514	510	484	393	379	365	361	528	478	515	498
ENSG00000029364	381	344	392	381	288	287	265	287	327	313	336	335	369	328	338	328	351	263	302	371	288	268	283	302	385	352	344	316	318	282	356	319	392	366	364	363	267	248	261	278	365	318	343	315	354	324	334	344
ENSG00000029534	94	106	108	103	136	133	126	138	148	140	151	146	95	106	120	102	134	156	143	137	164	133	151	144	133	129	147	147	111	121	111	102	137	143	171	128	179	142	158	183	137	125	105	130	119	108	121	120
ENSG00000029559	0	0	0	0	0	0	0	0	0	0	0	0	0	0	0	0	0	0	0	0	0	0	0	0	0	0	0	0	0	0	0	0	0	0	0	0	0	0	0	0	0	0	0	0	0	0	0	0
ENSG00000029639	32	31	35	44	38	34	38	26	32	32	18	26	30	34	26	22	36	29	46	25	23	31	49	28	35	22	31	16	32	35	41	33	25	46	31	32	34	24	27	20	32	27	31	32	34	25	36	32
ENSG00000029725	372	351	386	363	395	328	348	324	281	279	247	303	303	272	293	295	259	268	303	295	333	304	319	286	249	273	260	272	299	296	324	286	360	317	321	312	323	305	317	290	278	247	270	215	322	307	300	301
ENSG00000029993	227	240	235	205	134	131	152	129	162	143	177	130	202	159	169	154	201	148	180	184	146	110	131	116	164	149	151	173	186	171	201	171	216	175	198	214	95	138	114	121	184	167	151	177	191	169	169	183
ENSG00000030066	709	671	734	734	611	570	617	618	562	514	579	533	561	574	553	592	573	576	520	553	590	499	581	536	576	518	552	553	597	563	620	573	589	622	531	542	543	514	515	551	506	514	516	510	566	570	570	584
ENSG00000030110	39	65	45	35	56	61	54	56	66	64	54	53	68	67	66	69	76	83	65	69	71	72	80	65	54	53	57	41	54	64	71	61	64	56	66	55	43	55	56	47	54	39	61	52	58	62	65	73
ENSG00000030304	0	0	0	0	0	0	0	0	0	0	0	0	0	1	0	0	0	0	1	0	0	0	0	0	0	0	0	0	0	0	0	0	0	0	0	0	0	0	0	0	0	0	0	0	0	0	0	1
ENSG00000030419	893	842	851	822	886	830	892	862	703	615	682	652	836	784	820	723	679	620	630	610	858	799	850	837	748	651	650	695	844	900	919	837	869	806	822	842	823	825	800	790	693	662	742	730	860	835	845	812
ENSG00000030582	199	209	229	206	268	275	266	255	470	468	484	481	412	426	427	387	450	424	467	460	364	341	343	347	437	423	395	418	376	334	367	373	337	331	333	333	325	305	345	369	351	336	384	341	383	394	398	386
ENSG00000031003	181	181	187	166	217	229	233	223	120	113	112	126	157	147	172	150	128	130	138	146	176	197	201	178	141	134	132	123	185	179	184	198	195	147	155	181	245	223	250	210	129	131	140	135	213	181	178	189
ENSG00000031081	0	2	1	1	3	0	0	1	0	0	0	0	0	2	0	0	1	0	3	0	1	0	0	0	1	2	0	2	0	1	0	2	0	1	0	0	0	1	0	1	3	0	1	0	0	0	0	1
ENSG00000031691	62	60	82	73	62	42	72	57	46	53	43	43	54	33	57	51	44	35	42	43	57	59	59	64	40	43	48	53	36	45	40	47	64	38	73	58	53	59	64	53	55	54	51	59	48	43	60	61
ENSG00000031698	304	348	370	335	224	226	234	200	408	357	379	404	320	304	342	338	430	391	394	391	273	249	257	239	384	370	389	383	339	324	335	297	350	383	365	345	227	214	224	213	356	326	388	351	354	320	349	303
ENSG00000031823	145	150	175	151	131	132	131	119	213	195	215	227	192	191	211	201	254	232	239	219	151	146	167	133	236	217	200	193	198	174	182	193	177	193	185	186	173	128	149	142	182	161	193	169	184	165	200	224
ENSG00000032219	134	135	160	134	136	168	177	156	144	121	140	143	144	83	134	117	127	122	124	115	146	147	135	119	137	112	121	104	138	132	138	133	131	123	133	126	151	129	138	133	109	109	106	135	144	113	120	133
ENSG00000032389	131	105	156	129	143	127	156	144	203	222	207	189	224	214	226	214	209	179	186	179	201	157	207	177	209	171	206	198	193	198	221	196	163	149	143	154	159	142	189	188	175	165	148	175	203	212	202	225
ENSG00000032444	115	80	97	86	78	78	81	79	227	207	219	191	143	158	137	162	195	224	200	187	110	134	107	90	183	196	189	175	144	150	151	145	140	164	152	136	105	125	119	115	134	133	128	149	161	160	147	136
ENSG00000032742	40	42	65	43	24	33	28	26	41	30	34	29	44	45	31	29	31	32	44	40	32	27	29	32	43	37	37	53	39	31	47	49	46	36	27	41	22	25	23	24	43	30	37	41	38	35	42	27
ENSG00000033011	32	29	29	27	26	24	35	27	28	40	31	37	37	39	35	44	30	52	38	44	31	33	35	31	40	25	27	34	48	32	25	24	34	29	36	30	31	32	28	31	39	21	27	32	37	39	28	35
ENSG00000033030	166	125	152	174	117	130	137	129	110	105	104	126	101	105	129	99	119	123	97	146	151	113	94	106	106	115	131	112	122	113	107	123	117	151	139	113	107	102	88	89	122	116	120	127	97	118	119	114
ENSG00000033050	265	255	264	259	198	211	180	193	230	220	256	236	299	250	261	222	318	287	307	343	201	184	189	196	249	252	231	242	267	257	255	285	302	258	283	265	252	226	233	204	230	246	214	200	296	286	309	259
ENSG00000033100	118	104	110	100	121	114	139	105	178	188	207	192	190	173	144	187	159	163	199	171	163	188	170	144	164	176	178	179	176	170	171	168	151	155	159	133	172	169	182	148	166	127	162	156	186	170	181	207
ENSG00000033122	4	4	5	4	5	2	3	2	0	4	2	4	6	2	3	4	3	5	3	8	10	2	4	5	9	4	3	4	4	1	8	4	3	2	5	6	3	2	2	5	3	3	6	1	7	4	2	6
ENSG00000033170	126	131	156	123	175	174	191	187	112	106	106	101	136	123	105	132	126	100	107	105	190	172	180	160	117	134	127	126	113	123	124	126	124	122	142	128	161	147	189	167	118	98	131	103	140	141	143	122
ENSG00000033178	255	255	240	232	193	232	219	199	171	178	159	154	186	213	177	154	167	174	153	151	198	187	190	189	180	160	172	136	220	205	240	183	222	184	210	196	197	174	200	179	185	163	173	146	192	186	194	171
ENSG00000033327	413	417	408	381	442	473	421	449	534	536	568	546	580	542	552	543	546	532	580	530	539	486	532	491	506	531	549	464	484	491	482	457	428	415	375	424	478	454	499	425	462	462	455	440	526	518	540	544
ENSG00000033627	10	13	11	13	22	20	18	23	7	8	7	6	6	9	14	7	8	8	9	4	20	18	19	15	13	15	10	15	17	12	14	15	9	11	13	4	26	29	36	27	10	8	4	8	11	19	11	10
ENSG00000033800	199	160	187	192	189	198	162	174	151	145	160	148	165	141	145	166	154	181	169	149	179	153	171	171	149	156	152	124	176	146	189	152	167	145	163	134	159	155	176	138	147	135	149	142	172	139	180	155
ENSG00000033867	473	423	508	450	483	510	533	538	341	320	333	341	372	364	367	391	342	321	322	292	477	511	496	464	336	314	345	321	400	368	420	394	397	395	397	387	424	460	431	425	359	364	368	362	406	361	401	343
ENSG00000034053	0	0	0	0	0	0	1	0	0	0	0	1	0	0	0	0	1	0	0	0	1	1	0	0	0	0	1	0	1	0	0	1	1	0	0	0	0	0	0	1	0	0	0	0	0	0	0	0
ENSG00000034152	116	134	135	131	117	125	117	113	195	180	205	194	198	174	180	192	202	175	191	184	140	155	160	156	187	163	168	147	169	187	190	155	195	165	160	169	137	156	174	154	185	177	170	190	192	165	180	192
ENSG00000034239	0	0	0	0	0	0	0	0	0	0	0	0	0	0	0	0	0	0	0	0	0	0	0	0	0	0	0	0	0	0	0	0	0	0	0	0	0	0	0	0	0	0	0	0	0	0	0	0
ENSG00000034510	878	859	882	863	788	802	814	809	1253	1193	1212	1140	1274	1235	1271	1186	1302	1220	1285	1157	964	886	970	891	1162	1107	1161	1225	1124	1001	1071	978	1023	975	976	946	810	832	831	830	1101	1007	1080	1067	1155	1092	1145	1092
ENSG00000034533	16	26	21	25	18	12	20	12	12	18	16	15	26	26	15	12	18	16	18	12	12	14	15	7	15	16	23	15	19	12	12	15	21	16	17	15	16	15	12	14	15	18	9	15	14	17	11	18
ENSG00000034677	212	212	226	239	281	222	278	260	223	201	215	184	226	207	211	206	205	149	169	175	275	232	257	239	208	192	188	198	201	194	211	184	200	192	191	198	218	214	199	228	172	202	192	202	208	220	207	207
ENSG00000034693	39	31	24	29	24	31	49	29	28	29	30	34	34	34	29	29	29	24	22	27	41	39	23	61	29	28	50	47	43	26	28	29	40	43	29	30	39	27	31	34	28	30	33	26	43	36	52	32
ENSG00000034713	153	151	165	149	139	129	131	119	122	112	112	108	148	144	102	126	126	125	117	129	124	112	127	142	131	122	92	110	140	116	141	118	139	124	129	117	129	104	107	135	147	106	132	131	122	131	125	145
ENSG00000034971	0	0	0	0	0	0	0	0	0	0	0	0	0	0	0	0	0	0	0	0	0	0	0	0	0	0	0	0	0	0	0	0	0	0	0	0	0	0	0	0	0	0	0	0	0	0	0	0
ENSG00000035115	161	174	164	180	176	128	157	157	159	163	142	137	140	132	146	138	158	140	144	153	162	143	146	149	156	159	150	144	167	151	152	139	155	141	128	165	130	117	138	124	133	139	159	137	171	158	170	157
ENSG00000035141	162	134	178	153	120	113	121	124	105	115	139	124	128	125	111	107	111	118	132	124	122	92	122	109	112	123	124	113	132	123	131	141	142	133	119	133	117	120	121	124	117	96	117	100	154	103	100	125
ENSG00000035403	240	199	193	212	258	256	263	249	215	206	200	234	214	210	210	197	210	207	243	223	262	280	272	248	238	199	196	208	201	234	199	168	231	207	199	243	261	260	245	254	211	210	187	171	177	177	195	193
ENSG00000035499	121	117	112	113	78	74	68	87	70	73	76	82	102	87	91	66	76	68	83	71	81	80	98	66	68	79	78	79	113	98	118	81	107	120	80	83	60	72	76	83	83	93	104	76	89	89	92	93
ENSG00000035664	2	1	0	0	3	4	5	5	0	1	1	0	3	0	0	1	0	1	0	2	8	3	4	1	0	0	1	2	0	2	0	1	0	1	2	0	4	4	5	2	0	0	1	2	1	1	1	0
ENSG00000035681	350	325	396	325	286	204	258	265	274	268	273	269	288	285	271	285	288	280	265	266	236	202	237	233	271	278	287	281	291	338	315	300	342	319	318	313	254	249	244	260	285	257	310	307	283	265	290	302
ENSG00000035687	258	260	269	252	228	192	205	221	146	158	174	164	214	188	185	178	193	140	175	167	235	192	215	204	152	136	148	154	214	178	230	206	247	191	230	217	244	240	220	209	179	184	146	170	213	180	197	171
ENSG00000035720	12	7	6	9	9	15	8	18	4	8	6	5	10	7	8	8	6	1	4	3	10	8	12	9	5	11	14	6	6	12	3	3	8	4	7	8	11	12	5	15	11	10	7	9	7	3	6	16
ENSG00000035862	217	226	239	230	248	246	308	210	236	246	251	243	176	201	188	219	232	247	234	230	274	221	250	249	250	205	245	204	200	203	252	233	224	222	213	196	285	284	274	247	216	199	213	208	265	206	218	211
ENSG00000035928	536	525	548	508	603	526	537	469	437	411	399	424	469	450	444	444	456	411	419	415	519	482	517	509	380	392	394	366	521	495	461	512	457	441	444	427	442	434	478	487	401	429	395	367	459	435	469	457
ENSG00000036054	83	91	103	89	91	79	91	95	61	56	68	60	76	69	70	78	52	63	60	54	77	68	95	76	69	68	66	58	73	95	91	71	71	71	83	73	82	64	102	70	74	72	74	63	79	69	66	78
ENSG00000036257	298	264	311	273	198	205	242	214	204	190	201	191	248	190	180	203	221	188	190	200	186	207	204	181	184	165	184	191	218	238	206	217	240	230	225	259	210	208	203	214	211	180	211	216	224	195	214	202
ENSG00000036448	18	21	14	23	24	20	22	12	31	22	29	32	25	11	26	24	26	27	17	26	19	22	25	19	16	25	20	35	20	26	19	14	16	26	14	26	24	26	14	12	23	23	18	24	16	32	22	25
ENSG00000036473	0	0	0	0	0	0	0	0	0	0	0	0	0	0	0	0	0	0	0	0	0	0	0	0	1	0	0	0	0	0	0	0	0	0	0	0	0	0	0	0	0	0	0	0	0	0	0	0
ENSG00000036530	5	4	4	1	4	2	4	4	6	3	3	4	3	5	1	5	4	7	1	7	13	4	10	10	9	2	8	2	4	1	7	8	4	5	3	5	8	6	6	6	3	2	7	2	6	5	4	3
ENSG00000036549	193	214	241	233	192	164	197	187	170	150	202	181	167	160	140	157	158	156	155	171	165	169	190	195	172	131	147	152	209	184	177	197	211	164	206	191	181	173	156	181	162	155	140	152	191	201	162	164
ENSG00000036565	0	0	0	0	0	0	0	0	0	0	0	0	0	0	0	0	0	0	0	0	0	0	0	1	0	0	0	0	0	0	0	0	0	0	0	0	0	1	1	0	0	0	0	0	0	0	0	0
ENSG00000036672	3	4	4	2	3	6	4	6	4	3	13	5	6	4	6	4	9	0	12	5	11	8	3	3	5	9	7	8	3	5	2	3	7	4	5	8	6	7	8	7	6	3	8	11	5	5	1	7
ENSG00000036828	0	0	0	0	0	0	0	1	0	0	0	0	0	0	0	0	0	1	0	0	0	0	0	0	0	0	0	0	0	0	0	0	0	0	0	0	0	0	1	0	1	0	0	0	0	0	0	0
ENSG00000037042	16	12	7	18	13	10	12	19	29	16	19	32	10	7	15	13	13	19	16	13	13	25	18	18	29	22	21	17	10	17	21	13	12	15	18	13	19	12	8	14	10	20	15	13	20	12	19	14
ENSG00000037241	28	30	32	31	30	26	29	32	31	44	36	28	34	42	51	42	34	32	49	37	23	19	43	40	28	24	39	30	37	35	32	36	23	23	35	26	34	37	35	29	34	27	30	32	32	48	42	34
ENSG00000037280	9	10	7	3	26	19	18	14	31	24	23	25	11	21	11	13	21	15	21	21	16	19	24	18	25	22	23	21	12	12	10	13	4	10	5	9	12	17	17	11	17	10	17	16	9	10	4	10
ENSG00000037474	396	352	361	381	289	255	308	283	323	255	304	307	310	283	268	262	320	293	312	337	296	294	307	260	294	306	280	283	320	327	328	330	348	362	354	341	334	305	312	304	288	237	281	302	280	300	332	318
ENSG00000037637	104	95	95	119	104	109	93	91	118	97	130	117	111	106	117	103	122	124	126	119	96	92	114	89	125	121	118	117	120	122	117	100	84	95	82	85	90	87	91	80	102	112	110	89	108	105	106	120
ENSG00000037749	92	88	91	94	102	93	100	79	62	76	53	74	69	72	79	88	53	70	75	80	85	64	89	94	79	71	74	71	80	71	84	57	78	76	87	81	69	68	75	75	64	63	68	68	98	73	83	76
ENSG00000037757	59	49	80	46	67	61	58	53	108	98	104	96	95	79	101	71	101	108	101	94	83	79	86	79	91	93	95	90	88	81	88	82	102	81	80	77	77	68	65	72	86	68	86	80	78	87	85	99
ENSG00000037897	27	37	28	31	35	35	23	23	33	34	29	34	36	46	38	34	34	23	35	37	37	26	20	29	35	26	35	22	36	43	36	42	43	35	36	30	28	31	34	38	25	32	27	18	42	30	51	34
ENSG00000037965	0	0	0	0	0	0	0	0	0	0	0	0	0	0	0	0	0	0	0	0	0	0	0	0	0	0	0	0	0	0	0	0	0	0	0	0	0	0	0	0	0	0	0	0	0	0	0	0
ENSG00000038002	23	31	34	31	27	20	15	29	25	29	35	17	22	19	20	27	34	21	34	27	25	22	22	24	28	21	24	23	28	24	24	25	33	24	35	27	16	18	24	28	24	28	36	23	22	29	27	22
ENSG00000038210	206	212	239	187	160	193	173	191	145	149	148	145	155	138	152	128	140	134	137	125	178	181	169	174	188	130	158	128	178	167	179	180	216	185	176	202	169	160	175	163	194	193	204	169	159	158	155	170
ENSG00000038219	424	348	397	410	394	388	363	370	403	354	377	396	352	315	326	330	439	397	437	381	349	354	363	358	348	317	353	327	351	315	349	361	351	330	322	324	347	358	342	351	283	269	310	294	398	379	401	356
ENSG00000038274	326	332	334	333	275	273	279	296	265	253	239	245	263	264	297	283	244	242	287	269	272	233	259	254	277	277	285	269	300	304	249	292	317	259	299	298	243	233	234	246	261	252	274	289	285	262	270	259
ENSG00000038295	0	0	0	0	0	0	0	0	0	0	0	0	0	0	0	0	0	0	0	0	0	0	0	0	0	0	0	0	0	0	0	0	0	0	0	0	0	0	0	0	0	0	0	0	0	0	0	0
ENSG00000038358	270	221	262	219	245	221	236	249	413	408	398	395	356	358	371	347	392	373	363	382	316	284	311	318	393	365	358	349	370	348	363	360	325	304	313	338	288	256	254	268	314	322	298	352	355	332	358	316
ENSG00000038382	296	308	347	299	289	285	320	257	393	392	418	368	339	341	338	309	356	349	384	360	321	317	320	309	398	362	365	373	353	351	373	355	335	337	369	324	307	277	356	293	350	348	344	320	370	311	338	325
ENSG00000038427	0	0	0	0	0	0	2	1	1	0	0	0	0	1	0	0	0	0	0	0	1	0	0	1	0	0	0	0	0	0	0	0	0	0	0	1	0	1	1	1	0	0	0	0	0	0	0	0
ENSG00000038532	67	91	93	101	93	93	91	101	120	98	117	124	96	108	102	94	130	122	111	127	103	111	97	99	119	93	120	100	95	90	89	123	90	92	110	102	94	97	122	89	88	86	84	115	120	104	95	106
ENSG00000038945	0	0	1	3	1	1	0	0	0	0	0	1	1	0	1	0	0	0	0	1	1	0	1	1	0	0	0	0	1	2	0	1	0	0	0	1	0	0	0	0	0	0	0	0	0	0	0	0
ENSG00000039068	0	0	1	0	0	0	0	2	0	0	0	0	0	0	1	1	1	0	0	0	1	0	3	0	0	0	0	0	0	0	1	0	0	0	1	0	2	2	1	0	0	0	0	2	3	0	0	0
ENSG00000039123	363	304	329	367	261	271	299	261	263	250	276	240	273	262	286	253	257	239	236	258	277	270	284	258	250	207	255	246	288	289	270	307	316	300	320	307	278	261	268	268	293	237	280	217	263	286	292	282
ENSG00000039139	0	0	0	0	0	0	0	0	0	0	0	0	1	0	0	0	0	0	0	0	0	0	0	0	0	0	0	0	0	0	0	0	0	0	0	0	0	0	0	0	0	0	1	0	0	0	0	0
ENSG00000039319	58	69	94	80	88	95	100	101	58	67	62	43	55	47	62	68	51	55	71	44	101	103	91	101	64	58	50	54	63	78	64	68	67	74	68	69	94	78	87	87	68	50	60	65	57	65	66	61
ENSG00000039523	22	27	28	28	45	49	58	51	44	50	46	41	36	36	34	38	47	47	35	44	57	47	48	46	44	31	55	35	28	20	30	34	16	34	36	20	37	38	39	33	29	41	29	24	36	33	36	35
ENSG00000039537	0	0	0	0	0	0	0	0	0	0	0	0	0	0	0	0	0	0	0	0	0	0	0	0	0	0	0	0	0	0	0	0	0	0	0	0	0	0	0	0	0	0	0	0	0	0	0	0
ENSG00000039560	23	29	39	30	32	26	28	32	22	19	18	19	27	22	19	23	33	28	26	28	41	34	33	37	21	21	28	31	28	31	25	24	31	40	31	27	38	31	48	32	19	23	38	36	32	27	27	31
ENSG00000039600	0	0	1	0	0	0	0	1	1	0	0	0	0	0	1	0	0	0	0	0	0	0	0	0	0	0	1	0	0	0	0	0	0	0	0	0	0	0	0	0	0	0	2	1	0	0	0	0
ENSG00000039650	68	63	54	72	65	71	58	58	96	102	109	91	90	110	102	92	103	125	116	101	89	71	68	72	94	86	84	110	106	84	97	83	74	83	84	85	82	79	64	80	66	75	73	58	91	96	81	82
ENSG00000039987	1	1	0	0	0	0	0	0	2	0	1	0	0	1	0	0	0	0	0	1	0	1	0	0	0	0	1	0	0	2	0	0	0	0	0	0	1	0	0	0	0	0	0	0	0	0	1	0
ENSG00000040199	46	46	55	60	32	36	45	44	47	36	41	29	24	38	32	32	51	37	40	48	43	33	30	39	33	38	32	36	42	46	34	36	68	57	61	51	45	42	42	31	48	45	34	33	34	24	40	34
ENSG00000040275	206	169	190	183	140	126	153	126	118	128	135	89	150	125	139	137	150	115	124	116	140	127	116	101	158	131	134	115	166	155	131	158	144	153	136	181	131	132	131	118	135	133	132	125	163	116	132	152
ENSG00000040341	271	226	281	264	276	277	269	246	176	166	192	189	206	168	195	205	165	167	182	177	265	220	244	264	175	178	205	196	231	220	236	202	262	229	216	246	236	220	225	197	198	197	180	197	178	189	200	197
ENSG00000040487	18	22	14	20	26	47	47	28	31	34	40	35	54	43	55	42	34	34	44	35	60	60	36	46	32	34	48	41	53	30	39	40	24	23	29	36	45	36	38	40	27	26	40	31	42	37	38	41
ENSG00000040531	34	20	27	18	29	26	26	34	36	30	45	31	34	22	28	19	33	47	49	42	33	27	43	26	38	39	35	30	36	36	44	38	32	37	30	37	22	34	38	39	31	41	28	36	37	36	43	29
ENSG00000040608	74	64	60	81	64	69	70	53	168	126	152	159	131	104	112	121	116	123	130	149	87	91	86	80	108	96	105	112	125	107	109	115	115	127	117	91	64	68	68	70	129	106	125	90	108	108	103	120
ENSG00000040633	70	69	68	86	62	65	66	69	73	76	91	88	102	95	108	95	85	102	113	96	88	71	94	69	80	75	90	77	80	84	87	94	89	77	71	85	70	82	90	87	73	76	92	73	85	108	105	89
ENSG00000040731	0	0	0	0	0	0	0	0	0	0	0	0	0	0	0	0	0	0	0	0	0	0	0	0	0	0	0	0	0	0	0	0	0	0	0	0	0	0	0	0	0	0	0	0	0	0	0	0
ENSG00000040933	98	100	120	108	127	101	123	106	117	126	107	115	108	99	103	105	119	111	150	121	118	137	123	132	124	110	137	126	127	102	116	108	132	128	133	111	120	108	95	119	119	110	125	122	114	115	140	112
ENSG00000041353	0	0	0	0	0	0	0	0	0	0	0	0	0	0	0	0	0	0	1	0	0	0	1	0	0	0	0	1	0	0	0	0	0	0	0	0	1	0	0	1	1	0	0	0	0	0	0	0
ENSG00000041357	459	392	436	421	287	307	311	276	244	232	262	223	307	289	335	311	282	279	239	253	265	279	269	299	238	236	264	244	318	295	293	322	306	311	331	367	306	296	289	282	307	247	265	293	290	307	307	297
ENSG00000041515	0	0	0	0	0	0	0	0	0	0	0	0	0	1	0	0	0	0	0	0	0	0	0	0	0	0	0	0	0	0	0	0	0	0	0	0	0	0	0	1	0	0	0	0	0	0	0	0
ENSG00000041802	296	230	262	254	204	194	229	237	211	220	220	193	213	211	215	255	221	272	235	220	208	201	230	183	204	212	263	224	231	272	234	240	225	248	261	238	236	185	207	204	194	220	196	215	299	234	235	234
ENSG00000041880	25	28	29	27	48	38	30	24	41	41	42	44	40	32	28	27	24	27	40	44	27	45	41	44	40	34	30	35	19	31	36	33	26	27	23	21	25	23	31	35	34	29	25	26	34	41	31	32
ENSG00000041982	1	0	2	1	0	2	1	5	1	2	4	0	3	1	1	1	0	2	2	0	3	4	1	4	0	0	2	3	0	2	2	0	1	2	0	1	3	3	2	1	1	2	1	1	1	0	1	3
ENSG00000041988	25	29	45	36	24	28	28	32	54	50	60	38	50	43	56	48	46	42	54	49	31	37	33	39	49	41	53	41	41	34	43	45	41	37	41	51	29	35	31	34	49	44	44	43	44	42	32	41
ENSG00000042062	3	2	1	2	3	5	2	0	3	6	6	6	0	2	4	0	5	1	3	6	4	3	0	4	7	5	2	1	2	1	3	3	6	3	2	5	2	3	3	5	1	1	4	1	3	2	4	0
ENSG00000042088	178	168	165	166	126	118	148	138	163	141	155	163	181	158	158	184	187	168	148	145	139	132	123	134	174	182	164	165	164	177	177	181	153	144	145	142	110	112	122	134	152	161	174	173	162	166	148	152
ENSG00000042286	2	2	6	2	1	3	1	1	13	6	12	6	4	3	2	8	8	6	6	10	1	1	4	3	6	4	2	4	3	4	6	4	5	5	3	7	1	2	2	1	1	2	7	6	7	6	2	5
ENSG00000042304	0	0	0	0	0	0	0	0	0	0	0	0	0	0	0	1	0	0	1	0	0	0	0	0	0	0	0	0	0	0	0	0	0	0	0	0	0	0	0	0	0	0	0	0	0	0	1	0
ENSG00000042317	22	26	28	18	16	22	13	20	16	23	21	23	18	21	21	13	22	23	10	16	18	16	17	17	34	14	20	19	22	21	16	25	18	19	23	20	19	11	10	14	19	18	14	20	26	21	10	18
ENSG00000042429	143	122	133	117	114	91	110	137	100	91	97	98	110	108	102	108	89	102	107	110	118	83	106	111	106	112	98	75	105	96	95	82	132	114	134	121	118	114	87	90	123	103	100	106	123	108	92	95
ENSG00000042445	60	53	68	62	68	65	64	55	91	91	89	84	84	89	84	89	84	93	91	87	81	77	72	57	70	91	87	78	72	64	72	81	88	78	72	73	81	64	79	68	84	78	91	76	86	69	80	96
ENSG00000042493	134	116	120	118	194	162	175	169	211	201	200	189	222	206	227	247	185	192	195	194	260	256	264	268	176	171	189	177	189	188	182	205	171	133	170	154	233	189	209	193	154	139	169	152	200	224	241	205
ENSG00000042753	69	70	81	75	70	64	60	66	109	99	109	93	116	117	123	119	130	109	126	120	96	86	93	79	102	96	105	98	103	91	112	103	112	89	87	74	84	82	83	88	81	87	107	94	105	112	113	95
ENSG00000042781	1	0	1	1	0	2	0	1	0	1	0	0	0	1	0	0	1	0	1	0	2	0	0	0	0	0	0	0	1	0	0	1	0	1	1	1	1	1	1	0	0	1	0	0	1	1	0	0
ENSG00000042813	1	0	1	1	1	1	1	3	1	2	0	0	0	1	0	3	1	1	1	2	1	1	0	1	0	2	2	1	1	0	0	0	1	1	1	0	1	4	1	1	1	2	0	0	0	0	0	2
ENSG00000042832	1	3	0	0	1	0	4	2	1	0	1	1	1	0	0	0	1	0	3	0	0	2	0	1	2	2	1	1	2	2	1	0	0	0	0	2	1	1	1	0	0	0	2	0	2	2	2	1
ENSG00000042980	0	0	0	0	1	2	1	2	0	1	0	1	0	1	0	1	1	0	3	0	4	2	0	2	0	2	1	0	1	0	1	2	0	0	1	0	4	1	2	4	1	1	1	0	0	0	1	0
ENSG00000043039	0	0	0	0	0	0	0	0	0	0	0	0	0	1	0	0	0	0	0	0	0	0	1	1	1	0	0	0	0	1	0	0	0	1	0	0	0	0	0	0	0	0	0	0	0	0	0	0
ENSG00000043093	160	132	138	160	124	117	125	110	81	106	105	101	104	104	116	94	95	95	102	88	144	115	119	143	109	100	113	113	114	132	141	110	180	133	155	171	143	126	136	130	133	122	99	93	125	99	110	127
ENSG00000043143	124	119	113	115	100	113	124	98	159	168	167	152	128	145	157	156	168	143	137	148	121	128	117	106	136	144	149	135	131	130	160	124	141	135	144	127	144	109	119	105	97	123	138	134	177	154	148	149
ENSG00000043355	22	26	23	23	23	30	36	31	44	33	44	36	22	31	23	29	41	31	31	35	45	37	33	26	33	20	32	30	33	35	30	24	28	27	36	43	38	42	32	38	30	29	43	35	24	39	32	37
ENSG00000043462	87	108	90	101	90	113	101	101	81	80	108	93	122	79	100	95	89	86	92	89	122	104	110	105	73	84	103	100	91	86	103	97	77	84	85	88	116	92	103	106	81	74	106	89	89	111	130	103
ENSG00000043514	117	94	113	96	79	80	107	89	81	97	77	78	85	81	91	80	85	92	80	60	88	72	73	76	106	88	119	81	86	89	81	72	100	102	96	82	65	65	64	57	84	62	81	80	81	81	77	89
ENSG00000043591	1	1	0	0	1	0	2	0	2	0	1	2	1	0	1	1	1	0	1	1	0	2	2	1	0	1	1	1	0	0	2	2	0	1	0	2	2	0	0	2	3	3	2	0	2	1	0	0
ENSG00000044012	0	0	0	0	0	0	0	0	0	0	0	0	0	0	0	0	0	0	0	0	0	0	0	0	0	0	0	0	0	0	0	0	0	0	0	0	0	0	0	0	0	0	0	0	0	0	0	0
ENSG00000044090	43	57	59	68	63	53	59	60	123	111	128	115	97	93	98	79	124	116	97	116	85	76	76	83	125	85	132	105	96	88	106	86	95	95	78	76	71	49	74	67	102	105	110	96	83	81	98	95
ENSG00000044115	373	364	380	368	366	317	356	328	427	403	455	416	386	360	397	379	467	445	455	435	342	356	388	345	472	425	429	414	397	366	436	363	377	376	379	388	356	375	373	336	384	358	375	385	426	387	407	395
ENSG00000044446	192	173	202	158	159	147	171	161	254	278	231	261	191	195	209	189	245	206	212	254	188	161	176	164	247	247	263	234	171	200	209	201	190	186	200	184	154	135	160	141	211	206	215	193	218	209	197	184
ENSG00000044459	34	28	32	34	31	28	32	42	32	26	30	33	34	27	16	25	40	24	26	23	37	34	38	35	34	28	29	33	34	37	39	31	40	39	33	31	24	26	28	31	25	22	22	22	32	22	38	41
ENSG00000044524	0	0	0	0	0	1	0	0	0	0	1	0	0	0	0	0	0	0	0	0	0	0	0	0	0	1	0	0	0	0	0	0	0	0	0	0	0	0	1	0	0	0	0	0	0	0	0	0
ENSG00000044574	849	767	837	791	647	649	736	689	699	598	581	594	703	662	678	723	704	695	738	751	660	644	664	632	663	617	634	693	772	752	752	733	813	777	778	776	743	710	795	731	551	617	607	580	782	732	768	758
ENSG00000046604	1	1	1	0	2	1	0	0	0	1	1	0	0	0	0	0	0	1	1	1	0	0	0	1	1	0	0	0	0	0	0	2	0	0	0	2	0	1	1	0	0	0	0	2	1	1	1	1
ENSG00000046647	40	39	42	46	42	28	24	35	52	45	49	45	58	58	51	55	58	51	73	57	45	28	37	40	41	59	65	41	49	52	58	48	44	40	39	30	31	36	15	40	42	44	39	56	53	49	67	61
ENSG00000046651	268	233	285	279	254	245	298	235	273	229	262	249	245	203	205	227	234	224	270	224	253	256	256	250	275	289	265	259	253	247	237	240	230	226	218	242	248	234	249	213	251	222	259	230	263	245	221	214
ENSG00000046653	225	246	243	234	298	259	238	244	175	165	173	161	182	218	193	196	163	140	160	176	227	192	253	205	166	150	161	154	200	166	201	187	182	167	172	185	232	188	207	198	173	143	164	179	161	173	184	182
ENSG00000046774	0	0	0	0	0	0	0	0	0	0	0	0	0	0	0	0	0	0	0	0	0	0	0	0	0	0	0	0	0	0	0	0	0	0	0	0	0	0	0	0	0	0	0	0	0	0	0	0
ENSG00000046889	0	0	1	2	4	1	2	4	0	0	0	0	0	1	2	0	0	0	0	0	3	2	7	5	0	0	0	0	1	0	0	0	0	0	0	1	5	0	2	2	0	0	0	0	4	1	1	1
ENSG00000047056	124	105	111	117	134	98	118	94	125	140	114	164	100	117	117	98	149	162	123	113	131	116	121	116	124	136	155	145	137	121	109	106	133	143	125	135	107	111	106	111	115	132	127	120	127	108	139	121
ENSG00000047188	184	155	163	174	142	141	146	140	124	114	133	110	107	100	104	108	141	121	133	134	156	157	122	152	108	116	131	95	153	121	145	130	135	137	141	137	139	126	138	123	136	115	113	110	112	133	109	101
ENSG00000047230	98	92	102	89	89	86	81	72	65	81	74	85	74	75	83	82	71	82	76	75	81	66	88	89	77	80	91	79	83	88	83	83	96	86	95	65	79	70	78	73	84	81	95	67	94	69	82	73
ENSG00000047249	88	84	84	88	93	83	109	87	88	78	95	73	91	94	73	78	101	89	77	77	107	70	86	79	98	70	83	71	94	75	91	84	107	91	89	104	107	101	80	89	80	70	98	85	104	94	83	81
ENSG00000047315	598	589	621	560	496	467	482	506	436	374	404	434	504	470	472	469	432	428	459	426	458	442	500	422	438	405	403	399	542	534	589	502	562	486	486	486	453	408	440	448	441	457	422	459	498	482	518	468
ENSG00000047346	92	93	86	88	79	78	99	104	91	71	89	77	55	62	68	70	80	54	82	73	102	90	93	98	84	83	98	91	88	65	73	73	73	82	68	80	102	81	101	83	85	81	78	84	74	72	63	60
ENSG00000047365	78	89	90	79	129	94	125	120	53	73	70	58	83	68	75	66	61	64	62	71	106	102	120	107	64	63	65	61	87	88	83	68	79	85	97	89	97	99	91	100	80	75	85	73	80	63	63	81
ENSG00000047410	739	791	782	692	803	839	857	787	822	813	795	751	747	706	746	724	785	752	758	760	861	759	855	827	687	718	750	694	861	837	863	799	688	658	749	677	761	815	822	789	572	580	558	548	925	828	900	814
ENSG00000047457	2	0	0	0	1	0	0	0	0	1	0	0	0	0	1	1	0	0	0	0	0	0	1	0	0	2	3	0	0	0	1	0	0	2	1	2	0	0	1	0	0	1	2	0	1	0	0	1
ENSG00000047578	54	54	51	35	58	28	51	43	76	76	82	76	53	57	65	52	89	79	68	70	56	39	54	42	81	75	57	72	41	62	51	73	62	55	65	53	60	50	44	54	61	59	64	65	84	61	61	62
ENSG00000047579	49	46	37	39	39	51	42	42	43	52	48	43	70	55	49	45	54	44	50	57	28	41	59	50	41	50	48	37	52	42	42	49	54	39	33	45	48	48	52	42	39	47	45	39	58	49	52	55
ENSG00000047597	0	0	0	0	0	0	0	0	0	0	0	0	0	0	0	0	0	0	0	0	0	0	0	0	0	0	0	0	0	0	0	0	0	0	0	0	0	0	0	0	0	0	0	0	0	0	0	0
ENSG00000047617	0	0	1	0	0	0	0	0	0	0	0	0	0	0	0	0	0	0	0	0	0	0	0	0	1	0	0	0	0	0	0	1	0	0	1	0	0	0	0	1	0	0	0	0	0	0	0	0
ENSG00000047621	65	57	68	67	58	58	81	68	40	39	39	47	48	44	53	39	48	44	42	33	63	59	77	64	43	39	32	44	63	60	64	53	52	51	56	60	75	71	59	60	43	44	35	51	51	51	47	38
ENSG00000047634	0	0	0	0	0	1	0	0	0	0	0	0	0	0	0	0	0	0	0	0	0	0	0	0	0	0	0	0	0	0	0	0	0	0	0	0	1	0	2	0	0	0	0	0	0	0	0	0
ENSG00000047644	196	182	187	182	176	169	186	172	299	274	310	293	197	228	206	196	284	254	246	238	176	179	185	184	271	265	290	312	191	182	210	187	167	170	168	168	140	161	136	121	242	210	259	236	179	213	204	193
ENSG00000047648	0	0	0	0	0	0	0	0	0	1	0	1	1	0	1	0	0	1	0	0	0	0	0	0	0	0	1	0	0	0	0	0	0	0	0	0	0	0	0	0	0	0	0	0	0	0	0	1
ENSG00000047662	3	5	3	2	2	0	3	2	1	3	3	1	3	1	0	0	4	3	5	5	4	1	0	0	3	0	1	3	1	0	4	2	3	4	1	4	0	0	2	1	2	1	0	2	1	3	2	0
ENSG00000047849	705	684	743	707	656	595	652	637	846	755	782	767	653	609	710	640	804	791	829	741	665	600	672	615	751	676	792	738	628	665	677	666	746	730	758	703	618	621	624	647	643	640	705	670	677	669	678	645
ENSG00000047932	300	279	312	308	227	247	232	248	229	191	239	201	212	189	233	199	218	214	214	216	229	264	270	245	242	237	217	216	252	252	235	241	287	257	264	231	198	223	237	238	220	230	233	225	253	222	258	235
ENSG00000047936	0	0	0	0	0	0	0	0	0	0	0	0	0	0	0	0	0	0	0	0	0	0	0	0	0	0	0	2	0	0	0	0	0	0	0	0	0	0	0	0	0	0	0	1	0	0	0	0
ENSG00000048028	159	163	160	155	128	142	134	113	134	129	142	110	101	120	109	125	122	126	159	142	143	125	116	127	177	131	155	166	139	124	147	129	132	126	100	137	110	109	83	93	132	132	150	131	144	114	121	125
ENSG00000048052	274	279	283	273	192	218	239	249	249	226	271	236	256	254	255	253	260	252	227	215	244	224	228	224	298	249	270	215	252	255	293	268	235	210	240	247	187	217	186	182	241	258	235	250	261	245	250	231
ENSG00000048140	55	48	62	52	52	72	77	64	89	77	79	71	69	71	76	71	69	91	94	84	84	75	89	84	66	56	74	83	67	70	68	49	81	83	101	89	66	88	83	90	61	77	69	69	89	82	67	82
ENSG00000048162	104	92	102	98	69	79	73	75	110	94	105	106	116	130	99	112	92	112	104	109	94	67	77	82	93	93	88	87	131	103	105	115	94	103	99	115	92	68	85	70	111	87	110	82	106	109	116	114
ENSG00000048342	9	2	6	8	5	3	8	7	9	3	6	4	2	6	2	3	5	6	4	7	4	5	2	1	4	1	5	5	2	1	3	4	2	2	2	1	5	2	2	5	4	2	4	3	2	4	2	6
ENSG00000048392	211	228	242	224	200	189	204	199	167	141	143	169	181	145	183	179	161	126	145	106	202	186	237	205	170	163	179	173	224	206	217	217	231	210	205	229	232	201	229	202	185	193	183	211	188	182	189	185
ENSG00000048405	211	193	187	177	174	176	195	164	152	150	126	132	133	148	148	138	144	135	134	131	165	158	123	165	145	147	171	141	165	161	171	154	193	204	205	175	168	176	189	166	164	177	162	156	146	156	172	147
ENSG00000048462	1	1	0	0	1	0	2	2	1	0	0	1	0	0	1	0	0	0	2	0	1	1	0	1	0	2	1	0	0	1	0	0	1	0	0	0	1	0	0	0	1	0	0	2	0	0	0	0
ENSG00000048471	44	55	64	54	105	96	100	123	78	75	77	66	92	79	88	73	80	73	84	77	102	112	99	85	64	52	68	67	75	76	75	69	77	52	82	64	120	139	119	125	54	54	65	77	91	75	83	89
ENSG00000048540	0	0	0	0	0	0	1	0	0	0	0	0	0	0	0	0	0	0	0	0	0	0	0	0	0	0	0	0	1	0	0	0	0	0	0	0	0	0	0	1	0	0	0	0	0	0	0	0
ENSG00000048544	153	130	122	98	90	83	77	87	89	60	81	73	84	79	86	76	91	86	87	83	81	70	90	89	88	91	79	70	102	73	78	85	104	132	116	115	85	96	81	77	90	80	92	105	86	80	83	80
ENSG00000048545	0	0	0	0	1	0	0	0	0	0	0	0	0	0	0	0	0	0	0	0	0	0	0	0	0	0	0	0	0	0	0	0	0	0	0	0	0	0	0	0	0	0	0	1	0	0	0	0
ENSG00000048649	227	212	251	207	235	226	248	212	194	192	246	227	233	215	210	210	210	183	217	201	254	213	254	225	186	205	201	188	191	175	192	202	212	201	210	205	220	205	219	204	178	164	179	168	207	206	213	204
ENSG00000048707	150	148	157	163	151	177	185	152	134	148	155	130	122	109	137	124	183	168	145	154	150	135	135	158	137	152	134	149	117	133	135	138	168	157	155	167	163	153	159	159	138	120	144	127	141	152	141	121
ENSG00000048740	736	725	778	748	715	645	679	676	719	643	675	695	574	640	709	613	670	659	717	690	719	628	643	666	648	662	692	662	692	636	695	641	676	669	719	648	691	642	693	617	657	624	696	648	669	641	699	644
ENSG00000048828	636	658	731	682	557	499	548	509	699	684	715	690	621	601	614	598	736	715	717	636	613	523	570	543	628	625	667	642	653	668	694	683	733	720	675	700	585	550	568	569	625	618	660	619	634	646	644	630
ENSG00000048991	335	292	347	307	211	219	243	227	254	222	268	280	228	204	210	226	293	281	288	225	184	186	198	194	260	240	228	276	249	223	263	246	323	302	300	295	224	201	229	221	259	214	245	261	209	247	226	241
ENSG00000049089	23	25	19	25	44	35	34	19	47	43	65	47	28	39	41	46	54	51	42	41	48	72	65	53	33	39	36	45	29	23	28	38	34	41	38	24	55	45	44	34	33	31	32	30	43	35	40	28
ENSG00000049130	0	0	0	0	0	0	0	0	0	0	0	0	0	0	0	0	0	0	0	0	0	0	0	0	0	0	0	0	0	0	0	0	0	0	0	0	0	0	0	0	0	0	0	0	0	0	0	0
ENSG00000049167	41	47	53	44	38	39	42	28	26	29	26	28	31	25	35	40	30	27	30	35	35	27	31	30	29	26	27	19	35	32	35	35	36	39	41	31	30	29	31	28	34	28	38	26	34	38	27	25
ENSG00000049192	13	11	15	18	9	10	11	13	14	14	12	12	7	6	12	7	16	11	17	13	11	9	10	10	9	6	13	9	14	8	6	10	12	16	9	11	12	8	10	7	10	11	4	13	7	9	7	10
ENSG00000049239	291	273	287	273	382	357	386	410	513	408	456	436	406	375	465	406	438	452	449	415	460	462	464	470	422	446	425	408	417	367	418	366	370	320	315	331	441	368	390	360	335	385	372	389	416	417	439	456
ENSG00000049245	127	111	120	104	157	136	129	126	95	107	102	112	123	123	112	107	108	99	122	103	125	113	105	120	139	114	119	108	137	144	124	106	136	130	126	118	135	123	134	122	124	105	122	104	116	129	125	109
ENSG00000049246	33	44	44	35	83	56	70	68	48	49	43	43	49	50	50	51	37	48	38	41	67	64	88	75	58	39	49	41	49	57	44	52	31	33	45	20	54	53	60	55	41	38	37	36	53	59	47	34
ENSG00000049247	0	0	0	0	1	0	0	0	0	0	0	0	0	0	0	0	0	0	0	0	0	0	0	0	0	0	0	0	0	1	0	0	0	0	0	0	0	0	0	0	0	0	0	0	0	0	0	0
ENSG00000049249	5	6	7	1	18	19	25	15	7	4	5	5	10	11	10	11	9	2	7	5	14	28	18	20	9	9	4	7	14	12	8	14	6	9	9	14	26	22	24	30	3	6	10	7	10	11	17	10
ENSG00000049283	0	0	0	0	0	0	0	0	0	0	0	1	0	0	0	0	1	0	1	0	0	0	0	0	0	1	0	0	0	0	0	0	0	0	0	0	0	0	1	0	0	0	0	0	0	0	0	0
ENSG00000049323	4	1	2	1	4	3	2	2	0	2	1	0	2	1	0	0	1	3	4	2	3	2	2	2	3	0	0	1	1	0	1	2	6	3	4	3	4	6	3	3	2	2	2	1	2	6	5	0
ENSG00000049449	352	379	370	327	301	259	255	244	291	277	273	272	266	220	232	245	285	274	269	285	239	245	295	262	330	289	311	280	276	264	303	261	381	336	375	363	267	233	245	230	302	277	277	301	282	286	275	256
ENSG00000049540	0	0	0	0	1	0	0	0	0	0	0	1	0	0	0	0	1	0	0	0	0	0	0	0	0	0	1	0	0	0	0	1	0	0	0	0	0	0	0	0	0	0	0	0	0	0	0	0
ENSG00000049541	297	266	295	264	223	243	241	253	365	344	362	335	349	318	341	346	359	316	362	332	273	293	317	285	343	287	344	308	332	317	304	327	296	248	302	262	283	247	262	286	314	272	278	275	375	364	363	329
ENSG00000049618	506	528	547	572	314	331	324	319	680	703	720	654	600	518	615	533	686	637	725	668	350	334	354	314	622	588	655	602	558	553	597	510	592	605	605	614	342	331	327	356	635	562	621	606	564	524	541	560
ENSG00000049656	440	382	398	433	348	340	338	341	525	508	463	557	513	492	486	479	508	573	558	589	429	420	420	407	521	467	443	499	468	448	486	501	526	448	525	486	412	379	397	399	453	469	452	417	478	470	503	460
ENSG00000049759	20	19	15	19	24	27	31	24	20	26	18	13	16	10	18	12	28	21	16	28	26	29	29	33	25	25	18	22	13	32	31	26	18	24	26	18	23	28	22	21	20	25	21	25	11	22	15	18
ENSG00000049768	1	0	2	2	0	0	1	0	1	3	1	5	1	1	1	0	3	5	2	0	1	1	3	1	7	5	1	3	1	1	3	1	3	1	2	2	1	0	2	0	3	3	3	3	2	0	1	2
ENSG00000049769	3	2	5	1	3	6	4	2	8	7	8	3	3	6	4	5	8	2	3	7	8	5	9	5	6	8	8	3	6	11	3	5	5	3	5	5	1	4	3	4	8	4	7	2	1	7	8	8
ENSG00000049860	198	221	179	177	181	151	171	147	149	154	137	129	137	134	163	144	149	143	166	138	142	158	161	138	177	132	132	153	156	159	165	159	185	184	164	162	143	147	144	142	139	162	139	153	163	119	152	139
ENSG00000049883	39	31	34	27	29	26	27	30	27	17	34	30	28	31	27	24	41	28	27	39	35	38	26	28	30	20	32	25	40	30	27	26	28	37	27	36	27	25	28	24	26	32	28	20	27	25	36	23
ENSG00000050030	0	0	0	0	0	1	0	0	0	0	0	0	0	0	0	0	0	0	0	0	0	0	0	0	0	0	0	0	0	0	0	0	0	0	0	0	0	0	0	0	0	0	0	0	0	0	0	0
ENSG00000050130	98	75	96	81	88	76	80	70	69	46	71	63	77	66	74	65	73	55	70	58	78	64	82	61	73	73	77	54	77	71	84	59	62	93	65	72	81	68	57	83	75	67	64	64	75	77	70	68
ENSG00000050165	0	0	0	0	1	0	0	0	0	1	0	0	0	0	0	0	0	0	0	0	0	0	0	0	1	0	0	0	0	0	0	0	0	0	0	0	0	0	1	0	0	0	1	0	0	0	0	0
ENSG00000050327	6	2	4	5	8	4	4	7	7	6	11	10	9	8	7	10	1	13	5	6	10	12	7	5	6	12	10	4	6	4	9	9	6	5	3	4	2	7	6	6	7	8	12	5	13	5	3	5
ENSG00000050344	4	11	8	7	8	9	5	7	7	2	3	4	7	5	6	5	7	4	1	3	10	5	1	3	6	4	8	4	4	7	5	7	4	5	6	6	6	2	3	1	9	4	7	5	3	6	5	6
ENSG00000050393	160	143	160	133	132	134	129	106	106	110	89	101	101	87	106	94	118	109	114	103	123	124	132	115	92	79	96	78	112	117	118	111	135	133	148	151	121	114	121	136	102	105	111	95	133	106	116	107
ENSG00000050405	87	80	82	59	79	85	64	92	53	54	65	43	59	51	77	54	60	58	68	57	63	85	94	78	62	60	58	77	57	61	56	65	76	60	64	77	88	65	84	80	59	54	67	68	69	60	61	71
ENSG00000050426	197	165	199	208	210	171	203	192	180	173	188	202	183	158	203	169	220	202	201	217	178	204	188	191	208	220	240	189	187	161	196	176	202	172	197	180	153	145	150	168	178	184	192	208	159	166	181	159
ENSG00000050438	21	20	26	20	41	48	46	43	21	19	30	19	21	23	31	23	10	28	15	19	40	36	35	32	24	19	16	16	25	27	21	21	25	14	23	23	34	33	41	49	15	18	16	17	24	30	18	16
ENSG00000050555	1	0	1	1	2	1	5	1	1	2	0	1	2	1	1	0	4	0	0	2	1	2	2	1	0	1	2	0	3	0	1	0	3	0	2	0	9	1	4	2	2	2	1	0	1	1	5	4
ENSG00000050628	0	0	1	0	0	0	0	0	0	0	0	0	0	0	0	0	0	0	0	0	0	0	0	0	0	0	0	0	0	0	0	0	1	0	0	0	0	0	0	0	0	0	0	0	0	0	0	0
ENSG00000050730	0	0	0	0	0	1	0	0	0	0	0	0	0	0	0	0	0	0	0	0	0	0	0	0	0	1	0	0	0	0	0	0	0	0	0	0	1	0	0	0	0	0	0	0	0	0	0	0
ENSG00000050748	161	174	185	179	135	139	124	119	116	125	134	128	133	137	114	126	150	139	139	125	118	114	125	118	136	127	126	130	131	134	153	141	141	156	153	169	140	120	126	127	140	114	129	147	124	139	132	132
ENSG00000050767	2	0	0	0	1	0	0	1	2	0	1	1	2	0	2	1	2	0	0	0	0	1	3	2	0	0	2	1	0	1	0	0	0	0	1	0	2	0	0	0	0	1	0	0	0	1	0	0
ENSG00000050820	0	0	0	0	0	1	0	0	0	0	0	0	0	0	0	0	0	0	0	0	0	0	0	0	0	0	1	0	1	0	0	0	0	0	0	0	0	0	0	0	0	0	0	0	0	0	0	0
ENSG00000051009	71	55	64	73	63	58	63	65	102	104	115	108	108	66	80	96	105	91	117	98	64	70	67	76	108	92	96	87	82	90	94	79	84	90	74	80	73	78	51	67	82	84	77	79	74	81	86	92
ENSG00000051108	139	125	126	121	86	91	99	81	127	121	137	102	98	97	102	112	154	118	124	154	101	82	89	83	148	145	123	133	111	101	92	113	142	137	147	140	91	85	75	78	137	137	148	140	106	113	119	109
ENSG00000051128	8	8	7	9	1	9	10	4	14	12	6	12	6	8	7	5	11	8	11	11	5	5	7	6	9	12	12	8	12	15	14	14	9	8	5	3	6	6	6	6	6	7	9	5	5	7	10	9
ENSG00000051180	159	168	178	158	193	207	191	174	173	149	157	164	175	179	204	162	193	166	167	136	166	166	150	170	150	155	166	145	158	161	171	147	152	149	134	138	159	167	161	142	159	183	145	146	182	156	193	168
ENSG00000051341	321	267	293	258	388	401	398	362	230	199	239	225	229	232	274	260	242	231	223	249	343	305	382	311	214	204	219	200	268	244	255	247	181	165	199	204	280	302	282	315	197	226	193	216	225	241	262	260
ENSG00000051382	106	105	139	106	90	79	80	89	69	74	74	58	73	72	75	70	73	63	74	69	83	99	80	71	62	52	68	56	75	60	69	71	105	93	90	111	90	62	95	70	68	62	87	83	73	80	70	66
ENSG00000051523	230	221	244	244	239	240	215	230	455	430	433	424	355	381	379	345	410	385	396	409	367	314	346	296	352	330	377	318	378	344	341	346	380	294	332	330	281	292	285	291	354	334	325	321	363	315	336	364
ENSG00000051596	60	57	53	63	58	46	65	65	73	83	74	80	70	70	76	67	72	66	56	74	74	71	69	75	49	60	63	57	70	76	78	75	71	49	49	58	69	61	68	62	72	59	61	78	54	73	91	62
ENSG00000051620	47	46	42	33	29	36	34	32	42	39	41	38	36	23	29	30	33	38	46	43	33	33	42	38	39	45	37	52	35	26	29	32	60	35	40	48	25	24	31	33	51	40	42	50	30	34	23	33
ENSG00000051825	323	309	328	317	320	316	339	308	239	237	241	255	275	247	256	232	234	265	243	243	307	273	305	275	282	233	264	252	279	265	325	276	276	278	271	245	279	240	224	297	214	235	246	229	259	257	268	277
ENSG00000052126	45	45	50	49	38	26	39	22	41	32	27	38	29	34	22	36	37	36	40	45	25	24	34	24	45	48	30	43	35	28	29	28	38	38	35	26	35	33	28	29	38	44	28	40	26	25	28	29
ENSG00000052344	1	0	0	0	1	0	0	0	0	0	0	2	0	0	1	1	0	0	0	0	1	0	0	0	0	0	0	0	1	0	1	0	0	0	0	1	0	0	0	0	0	2	1	0	1	0	0	0
ENSG00000052723	252	228	229	209	181	194	171	177	180	170	176	165	157	141	141	147	173	172	165	140	202	166	183	169	173	190	193	177	183	163	166	168	224	188	205	165	175	167	155	164	177	176	208	202	179	175	182	173
ENSG00000052749	146	138	143	149	106	118	139	108	196	210	241	237	231	212	234	190	234	226	226	214	167	130	151	154	183	172	180	188	220	187	214	187	188	188	194	159	131	135	152	136	160	159	153	138	212	215	197	195
ENSG00000052795	59	56	79	71	70	66	82	76	52	57	46	48	53	60	55	49	52	55	47	53	64	61	85	75	46	46	46	51	63	61	56	59	63	45	61	66	60	69	67	68	57	42	44	53	42	57	63	58
ENSG00000052802	347	321	353	330	227	211	236	188	219	198	170	216	161	139	183	174	208	193	188	209	194	191	245	219	190	183	205	187	173	187	171	182	303	296	325	327	167	188	193	143	235	247	277	238	152	146	199	188
ENSG00000052841	245	277	305	284	262	267	263	279	260	235	288	255	243	229	237	258	247	270	263	225	267	248	246	262	274	247	284	262	246	267	267	245	212	242	234	224	238	208	218	218	276	242	239	244	219	263	260	269
ENSG00000052850	0	0	0	0	0	0	0	1	1	1	0	0	0	0	1	1	0	1	0	0	0	0	0	0	0	0	0	0	0	0	0	1	1	1	0	0	0	2	0	1	0	0	1	0	0	0	1	0
ENSG00000053108	1	1	1	0	3	0	0	2	1	1	0	1	2	1	1	0	1	1	1	0	1	0	0	0	2	1	1	0	0	0	0	0	1	1	0	0	1	0	0	0	1	0	4	0	3	1	0	0
ENSG00000053254	264	249	243	287	230	203	236	207	260	216	242	247	230	232	227	207	240	228	242	259	233	229	224	215	253	232	264	269	242	219	228	223	243	220	251	232	234	200	238	211	264	243	254	244	277	261	219	222
ENSG00000053328	0	0	0	0	0	0	0	0	0	0	0	0	0	0	0	0	0	0	0	0	0	0	0	0	0	0	0	0	0	0	0	0	0	0	0	0	0	0	0	0	1	0	0	0	0	0	0	0
ENSG00000053371	109	89	99	83	128	130	145	123	171	180	154	147	152	158	157	165	165	160	166	153	162	155	160	172	163	149	150	152	183	148	162	142	127	130	128	140	133	139	160	145	137	146	162	154	143	124	149	126
ENSG00000053372	224	259	253	252	210	193	186	175	254	265	258	249	291	253	298	293	284	298	308	258	215	184	196	231	233	228	265	198	283	275	295	278	258	244	248	280	224	208	201	210	236	205	244	233	295	301	280	281
ENSG00000053438	4	1	1	1	0	2	0	5	3	2	2	1	2	2	2	0	3	0	3	4	3	3	3	2	1	2	2	0	1	2	2	3	3	0	1	2	2	3	1	3	1	3	0	1	2	3	0	1
ENSG00000053501	22	18	28	27	27	25	23	29	54	46	48	38	43	53	52	33	52	49	47	35	44	44	41	33	41	36	54	31	34	30	53	35	40	23	34	28	38	26	36	38	45	24	24	25	42	46	63	44
ENSG00000053524	4	5	6	4	9	7	8	8	3	3	5	7	5	5	9	6	3	0	6	3	8	6	7	14	11	8	6	9	6	3	2	5	6	4	5	3	6	7	10	7	5	1	9	4	7	8	8	3
ENSG00000053702	18	16	15	10	9	10	14	11	22	23	15	24	6	12	17	15	21	20	18	14	10	5	14	10	24	17	20	19	14	19	22	7	15	13	10	18	10	12	12	12	18	6	9	15	21	10	14	17
ENSG00000053747	15	14	13	13	27	24	29	31	9	10	14	11	17	12	9	16	13	11	12	9	28	30	28	20	11	13	8	9	9	11	20	12	15	15	10	9	35	25	35	27	9	5	8	10	12	14	12	18
ENSG00000053770	113	153	125	159	102	106	97	121	74	72	75	73	85	84	84	95	74	79	89	86	104	125	97	100	87	67	83	83	118	98	101	113	106	113	110	112	107	72	115	106	98	72	81	64	97	98	101	101
ENSG00000053900	145	141	160	131	109	109	108	121	81	107	99	96	99	104	98	92	89	88	79	87	121	107	110	120	119	110	129	112	100	102	117	126	127	146	112	123	115	103	93	82	113	113	119	126	100	101	115	108
ENSG00000053918	0	0	1	0	0	0	0	0	1	0	0	0	0	0	1	0	0	0	0	0	0	1	0	1	0	0	0	0	0	0	0	0	0	0	0	0	0	0	0	0	0	0	0	0	0	0	0	0
ENSG00000054116	91	79	94	79	55	83	80	58	56	64	67	83	77	66	89	75	72	71	89	77	74	62	67	66	61	78	79	59	79	73	62	71	106	75	91	89	67	63	72	58	84	63	76	74	84	79	77	72
ENSG00000054118	890	932	955	843	729	740	802	712	775	767	791	705	841	852	861	812	784	752	822	835	722	732	704	724	710	703	673	674	900	798	848	793	811	770	809	802	754	781	758	757	697	652	719	654	850	795	828	813
ENSG00000054148	57	51	66	54	71	58	63	59	147	134	99	127	135	120	133	126	144	128	124	114	88	86	88	86	116	112	118	118	132	100	122	118	90	74	68	82	91	99	77	63	95	100	81	87	112	122	122	111
ENSG00000054179	0	0	0	0	0	0	0	0	0	0	0	0	0	0	0	0	0	0	0	0	0	0	0	0	1	1	0	0	0	0	0	0	0	0	0	0	0	0	0	0	0	0	0	0	0	0	0	0
ENSG00000054219	59	54	73	66	79	72	64	66	36	42	38	58	34	43	38	44	35	29	35	37	57	53	52	68	31	53	47	45	55	49	50	48	52	52	63	53	54	62	52	63	42	38	44	47	45	47	51	36
ENSG00000054267	225	244	267	215	262	253	294	267	184	210	192	169	233	213	217	209	189	213	193	219	235	239	251	240	202	191	191	180	223	195	220	212	237	200	229	230	238	244	281	262	173	162	187	180	235	229	260	225
ENSG00000054277	14	10	12	18	13	10	11	6	27	21	21	27	11	13	18	18	21	25	20	14	15	21	16	19	20	17	17	20	16	18	14	19	23	19	19	19	14	16	13	12	22	17	21	26	12	22	25	13
ENSG00000054282	39	33	39	43	37	25	36	41	28	34	39	33	31	29	35	28	34	43	29	42	29	37	32	39	45	41	41	33	32	34	39	39	34	42	46	36	44	27	36	43	20	34	33	40	35	33	35	33
ENSG00000054356	0	0	0	1	2	2	0	1	0	0	0	0	0	1	0	0	1	0	0	0	0	2	0	0	1	1	1	0	0	0	1	0	0	0	0	0	0	0	1	0	0	0	0	0	0	0	0	0
ENSG00000054392	15	11	11	15	14	12	17	17	16	17	19	13	11	24	14	12	17	17	21	11	13	17	15	19	18	16	12	14	16	23	16	16	12	17	12	9	17	17	21	21	16	12	12	14	11	13	10	20
ENSG00000054523	182	183	184	185	211	219	233	199	150	162	172	119	151	132	157	156	180	158	177	176	215	177	200	184	179	159	184	140	180	156	149	173	177	206	198	193	194	206	220	190	166	164	203	183	170	156	161	152
ENSG00000054598	0	0	0	1	0	0	0	0	0	0	0	0	0	0	0	0	0	0	0	0	0	1	0	0	0	0	0	1	0	0	0	0	0	0	0	0	0	0	0	0	0	0	0	0	0	0	0	0
ENSG00000054611	71	55	66	52	70	50	82	70	109	90	116	110	120	103	113	104	115	102	97	83	83	76	67	95	93	99	97	86	77	77	120	98	87	80	90	69	103	69	72	79	91	83	75	84	90	87	105	99
ENSG00000054654	341	329	362	343	583	549	646	590	373	348	361	358	409	387	381	386	354	344	411	372	520	518	520	524	292	334	299	298	468	453	476	424	323	290	297	347	557	472	499	500	247	265	254	245	448	454	427	427
ENSG00000054690	1	1	3	2	4	4	2	2	3	1	1	1	0	0	2	6	6	2	2	4	1	1	3	0	6	0	5	1	3	1	2	1	4	3	3	5	2	7	1	1	3	2	0	1	3	3	5	1
ENSG00000054793	323	304	317	293	543	505	578	480	316	315	337	341	403	374	398	396	324	330	336	340	611	554	611	561	306	268	297	276	384	375	371	359	311	319	329	353	561	531	561	557	267	264	272	243	387	414	401	396
ENSG00000054796	0	0	0	0	0	0	0	0	0	0	0	0	0	0	0	0	0	0	0	0	0	0	0	0	0	0	0	0	0	0	0	0	0	0	0	0	0	0	0	0	0	0	0	0	0	0	0	0
ENSG00000054803	0	0	0	0	0	0	0	0	0	0	0	0	0	0	0	0	0	0	0	0	0	0	0	0	0	0	0	0	0	0	0	0	0	0	0	0	0	0	0	0	0	0	0	0	0	0	0	0
ENSG00000054938	0	2	0	0	0	0	0	0	0	0	0	0	0	0	0	0	0	0	0	0	0	0	0	0	0	0	0	0	1	0	0	0	0	0	1	1	0	0	0	0	0	0	0	0	0	0	0	0
ENSG00000054965	157	202	192	187	209	171	203	190	188	209	184	195	180	164	189	169	190	173	213	179	191	180	206	177	223	199	246	206	173	176	220	187	205	176	153	153	183	151	171	169	156	183	177	200	173	166	180	186
ENSG00000054967	63	62	70	77	82	62	80	76	132	111	125	120	115	85	124	112	105	112	99	109	111	92	109	94	109	108	104	98	82	111	111	84	91	67	85	71	89	86	74	100	112	81	93	80	92	96	91	86
ENSG00000054983	148	149	153	146	131	156	172	150	132	114	137	118	125	118	120	124	117	101	100	118	160	155	140	148	136	126	133	103	143	146	156	141	144	128	128	127	139	144	147	127	128	110	111	133	119	144	153	126
ENSG00000055044	471	518	548	474	349	318	340	315	363	323	334	314	326	336	333	338	375	369	345	333	347	349	346	341	331	341	360	348	373	373	387	410	446	449	464	459	411	381	389	329	340	335	343	366	381	383	407	374
ENSG00000055070	227	235	239	280	212	221	212	206	340	338	355	306	347	342	376	331	327	345	351	309	269	242	283	233	323	328	313	330	354	316	325	324	298	274	299	266	263	281	262	230	300	277	308	297	352	296	366	338
ENSG00000055118	0	0	0	0	0	0	3	0	0	1	0	0	0	0	0	0	0	0	0	0	0	0	0	2	0	1	1	0	1	0	0	0	0	1	0	0	1	1	0	0	0	0	0	0	0	0	0	1
ENSG00000055130	554	563	533	512	402	401	473	415	455	468	425	485	482	447	481	492	530	488	459	467	442	430	418	414	444	440	509	447	462	494	513	523	497	494	511	480	435	402	408	392	443	429	458	426	492	444	502	483
ENSG00000055147	57	68	68	54	65	46	45	46	57	53	52	43	50	51	49	54	44	34	54	37	59	49	56	47	45	44	55	46	54	53	51	52	63	49	64	59	61	44	37	44	71	52	45	55	52	50	57	48
ENSG00000055163	1411	1465	1440	1446	1099	1010	1026	963	1857	1807	1784	1729	1389	1286	1376	1342	1750	1696	1803	1778	1154	1093	1186	1108	1840	1630	1655	1690	1318	1303	1299	1303	1531	1370	1452	1491	1092	1065	1065	1045	1515	1519	1535	1497	1436	1333	1427	1370
ENSG00000055208	254	273	242	272	282	258	250	249	232	219	226	209	230	194	205	169	245	185	210	219	225	254	213	218	231	212	222	194	258	216	254	248	249	231	236	231	245	231	225	209	269	224	239	249	233	206	238	236
ENSG00000055211	60	72	65	51	51	46	48	47	43	37	43	36	48	42	38	35	34	54	60	42	52	46	67	59	61	48	50	46	62	39	51	51	71	69	85	73	57	45	70	59	59	63	56	52	49	45	45	38
ENSG00000055332	519	475	603	543	442	431	428	419	298	324	302	291	313	296	304	304	361	307	322	273	362	364	361	339	357	312	307	329	376	358	372	353	414	508	462	472	375	335	381	418	394	360	378	368	318	345	342	327
ENSG00000055483	310	277	307	293	282	243	257	243	362	353	398	377	350	329	290	350	377	370	382	387	275	289	277	310	352	341	357	354	329	276	321	341	337	328	341	283	316	288	308	327	309	313	300	287	337	305	377	321
ENSG00000055609	754	679	704	690	749	646	711	701	678	669	691	656	610	551	611	545	678	618	673	632	586	632	577	582	672	584	620	653	594	590	604	561	666	658	632	610	636	612	653	570	643	583	589	572	630	592	599	642
ENSG00000055732	0	0	1	0	0	0	1	0	0	1	0	0	0	0	0	0	0	0	0	0	2	0	0	0	0	0	0	0	0	0	1	0	0	0	0	0	0	0	0	0	0	0	0	0	0	0	0	0
ENSG00000055813	2	1	1	0	3	1	1	3	2	2	1	6	2	4	1	3	0	0	2	2	0	1	0	2	2	3	0	1	0	0	4	2	2	3	1	1	1	2	0	1	2	1	0	1	4	0	1	2
ENSG00000055917	948	889	954	891	818	762	806	707	757	695	752	703	766	710	793	740	780	700	730	726	769	772	739	733	769	687	730	697	905	810	893	846	810	803	835	809	742	736	730	701	733	696	727	711	833	770	775	835
ENSG00000055950	62	71	65	58	53	64	49	38	104	106	117	113	93	109	109	89	92	97	106	93	57	51	76	65	113	94	94	91	86	78	105	92	70	70	78	69	64	63	66	63	77	86	86	82	88	90	119	105
ENSG00000055955	0	1	1	1	0	1	0	2	0	2	0	0	0	0	0	0	0	0	1	1	2	0	0	0	1	0	0	2	0	1	1	1	0	1	1	0	2	1	0	1	1	0	0	0	1	1	1	1
ENSG00000055957	0	1	0	0	0	1	0	0	0	0	0	0	0	0	0	0	0	0	0	0	0	0	0	0	0	0	0	0	0	0	0	0	0	0	0	0	0	0	0	0	0	0	0	0	0	0	0	2
ENSG00000056050	64	66	59	64	66	31	52	48	50	48	41	47	50	41	52	41	39	50	34	32	48	56	50	48	43	33	52	51	47	48	42	45	68	49	46	65	55	42	38	38	39	46	49	37	51	38	51	48
ENSG00000056097	426	410	378	413	409	364	416	390	377	356	335	298	411	387	416	401	357	345	318	351	431	347	362	356	333	363	312	324	417	385	439	437	356	403	403	378	353	351	350	330	363	360	350	334	397	389	377	389
ENSG00000056277	64	51	67	62	60	43	49	50	42	44	39	36	36	38	34	34	40	36	45	40	54	58	55	46	39	38	51	46	45	34	36	49	54	54	51	47	54	56	52	63	45	42	41	30	43	38	45	51
ENSG00000056291	0	0	0	0	0	0	0	0	0	0	0	0	0	1	0	0	0	0	0	0	0	0	0	1	0	0	0	0	0	0	0	0	0	0	0	0	0	0	0	0	0	0	0	0	0	0	0	0
ENSG00000056487	0	0	0	0	1	0	0	0	0	0	0	0	0	0	0	0	0	0	0	0	0	0	0	0	0	1	0	0	0	0	0	0	0	0	0	0	0	0	0	0	0	0	0	0	0	0	0	0
ENSG00000056558	42	39	54	39	47	44	58	44	69	78	93	86	66	58	75	52	66	84	63	55	60	66	70	59	98	76	80	80	71	51	63	48	48	59	50	45	44	39	33	44	73	53	68	61	58	53	51	47
ENSG00000056586	436	370	391	376	483	463	482	463	307	331	301	309	385	299	353	347	313	295	291	275	448	407	448	447	340	273	302	323	318	291	323	273	386	358	396	327	441	370	421	410	307	321	317	307	356	344	356	339
ENSG00000056678	0	0	0	0	0	0	0	0	0	0	0	0	0	0	0	0	0	0	0	0	0	0	0	0	0	0	0	0	0	0	0	0	0	0	0	0	0	0	0	0	0	0	0	0	0	0	0	0
ENSG00000056736	13	12	13	6	10	9	5	8	8	8	9	8	6	7	13	8	5	6	9	14	12	13	2	6	9	5	8	7	14	11	10	8	14	9	6	9	11	12	7	10	10	6	11	4	6	10	8	6
ENSG00000056972	224	235	252	217	183	174	204	188	262	253	265	231	273	209	238	214	298	258	292	277	187	206	200	209	261	253	264	235	271	251	257	252	211	231	222	263	205	200	202	195	259	204	229	226	247	265	264	266
ENSG00000056998	0	0	0	0	0	0	0	0	0	0	0	0	0	0	0	0	0	0	0	0	0	0	0	0	0	0	0	0	0	0	0	0	0	0	0	0	0	0	0	0	0	0	0	0	0	0	0	0
ENSG00000057019	100	94	96	81	99	90	88	108	88	74	77	75	72	81	82	84	84	71	77	70	82	75	73	97	81	83	83	66	70	86	93	100	72	76	86	74	78	75	72	75	73	79	98	85	86	74	103	84
ENSG00000057149	0	0	0	0	0	0	0	0	0	0	0	0	0	0	0	0	0	0	0	0	0	0	0	0	0	0	0	0	0	0	0	0	0	0	0	0	0	0	0	0	0	0	0	0	0	0	0	0
ENSG00000057252	131	139	168	152	149	171	150	139	119	94	108	101	106	108	111	110	126	103	113	103	140	113	145	137	112	119	114	103	116	116	126	115	142	135	141	137	131	134	139	144	111	101	123	114	104	110	124	108
ENSG00000057294	0	1	0	0	1	0	1	1	2	0	0	0	0	0	1	1	1	0	2	0	0	1	1	0	1	0	0	1	0	0	1	1	0	1	0	1	0	1	0	0	0	0	0	1	0	0	0	0
ENSG00000057468	3	0	4	0	4	4	3	1	5	3	2	2	1	0	3	1	3	3	3	5	3	2	1	3	5	3	5	4	1	3	2	8	2	0	2	2	1	2	4	4	1	1	4	2	2	8	2	3
ENSG00000057593	0	0	0	0	0	0	0	0	0	0	0	0	0	0	0	0	0	0	0	0	0	0	0	0	0	0	0	0	0	0	0	0	0	0	0	0	0	0	0	0	0	0	0	0	0	0	0	0
ENSG00000057608	1092	1104	1140	1099	1031	1025	1105	1078	792	800	799	774	1039	931	962	929	836	823	847	804	1085	970	1027	973	834	756	786	802	1041	976	1048	1001	1062	1002	959	977	1026	994	1079	959	817	781	844	867	979	953	1046	960
ENSG00000057657	1	1	1	1	2	1	1	1	2	0	1	0	4	3	3	1	1	0	3	0	0	0	0	2	1	0	1	0	2	0	0	0	1	2	1	1	4	2	1	3	2	0	0	1	3	2	2	2
ENSG00000057663	111	95	133	116	86	88	95	84	74	81	78	78	98	77	76	86	90	68	79	86	98	78	80	89	80	94	67	89	104	87	110	83	121	94	79	113	90	80	98	87	86	79	87	96	100	69	81	82
ENSG00000057704	0	0	0	2	1	0	1	2	0	0	0	1	1	2	0	1	0	0	1	0	1	0	1	2	2	1	1	0	0	0	0	1	1	0	0	0	0	1	4	2	0	1	0	0	2	2	0	0
ENSG00000057757	147	163	175	182	138	129	171	158	156	139	143	159	160	140	179	152	141	163	170	141	153	168	150	165	165	124	169	120	188	178	189	161	169	139	182	170	183	166	143	157	168	151	132	149	162	162	186	171
ENSG00000057935	84	81	98	85	79	78	83	76	77	76	88	82	74	59	83	60	74	73	74	70	84	73	86	85	85	84	67	103	90	73	83	76	79	88	83	63	82	67	67	73	75	72	73	72	72	65	82	70
ENSG00000058056	319	303	304	313	315	274	301	288	218	252	222	240	267	268	263	223	262	271	249	258	229	259	265	255	237	237	258	214	268	297	282	277	316	247	277	293	292	266	261	237	254	264	277	247	263	247	256	227
ENSG00000058063	346	309	322	369	377	360	351	357	278	270	262	261	308	313	321	281	271	258	232	238	350	361	392	358	278	254	247	257	345	312	352	326	270	308	284	316	288	305	341	330	257	249	274	289	319	292	291	310
ENSG00000058085	0	0	0	0	0	0	2	0	0	0	0	0	0	0	0	0	0	0	0	0	0	0	0	0	0	0	0	0	0	0	0	0	0	0	0	0	0	0	0	0	0	0	0	0	0	0	0	0
ENSG00000058091	467	426	514	459	586	560	585	545	386	353	352	342	442	380	404	433	350	339	347	362	530	504	517	512	390	337	366	336	475	477	452	469	472	435	497	436	500	482	502	520	389	369	340	371	429	420	417	424
ENSG00000058262	395	420	428	412	447	391	415	412	463	424	461	445	470	481	488	429	464	439	515	507	446	422	433	410	466	431	472	462	503	431	536	462	474	467	484	475	498	440	503	434	443	418	430	439	501	435	514	485
ENSG00000058272	343	326	340	354	333	339	297	318	275	292	288	274	274	266	255	242	253	253	285	232	284	281	309	314	267	243	300	265	301	289	279	287	329	302	308	311	329	316	281	317	265	270	281	272	285	260	297	261
ENSG00000058335	0	1	1	0	0	0	1	1	1	1	1	0	0	0	0	1	0	1	0	0	2	1	2	0	2	0	1	1	0	0	0	1	0	0	0	2	1	0	0	0	0	0	0	0	1	1	2	1
ENSG00000058404	1	2	3	2	1	2	5	4	1	1	2	2	0	2	3	1	3	2	1	3	6	0	5	1	3	2	1	5	2	0	1	2	2	1	2	1	2	6	3	4	1	1	2	1	2	1	0	1
ENSG00000058453	52	48	66	62	59	52	49	42	122	103	101	97	91	86	66	69	99	103	100	97	74	58	75	76	96	77	103	100	78	88	59	82	82	74	82	75	53	80	59	55	105	85	81	91	67	74	91	76
ENSG00000058600	192	187	188	158	139	132	123	133	250	222	279	229	210	212	243	191	251	250	267	230	179	181	178	161	206	214	211	198	240	198	223	201	216	201	225	234	182	176	162	192	207	182	199	164	215	244	228	240
ENSG00000058668	457	428	503	469	567	554	619	574	491	454	472	427	409	374	417	397	444	456	482	455	522	450	560	517	522	446	456	428	369	370	416	372	403	403	415	407	517	481	476	500	400	424	420	398	386	387	378	390
ENSG00000058673	619	613	641	589	507	471	533	475	488	480	469	455	538	480	494	488	489	492	476	453	503	472	506	459	572	547	513	559	587	510	559	566	569	508	519	512	464	442	442	438	518	496	544	481	496	477	536	496
ENSG00000058729	112	112	113	121	85	82	86	106	71	85	69	70	80	81	72	87	74	78	83	66	102	112	85	92	80	51	78	75	101	95	74	94	108	91	97	93	100	100	96	88	100	92	90	93	86	86	83	97
ENSG00000058799	34	29	33	34	34	27	38	26	22	22	29	21	29	32	37	25	27	34	40	23	48	27	28	38	28	32	37	30	31	27	35	39	35	33	36	33	32	28	37	24	29	32	27	28	24	32	27	24
ENSG00000058804	435	388	443	393	344	343	329	293	288	282	333	296	325	323	351	291	287	278	307	250	338	318	358	306	278	285	298	303	391	385	355	362	383	356	400	359	314	277	288	271	314	292	334	316	331	311	314	329
ENSG00000058866	0	3	3	1	5	5	11	10	2	3	6	3	6	7	6	4	6	2	6	3	7	5	12	6	8	3	9	3	3	5	6	4	5	7	11	5	11	4	8	10	6	4	5	2	6	6	6	9
ENSG00000059122	120	126	142	131	137	115	129	130	231	245	241	236	193	166	155	169	252	226	244	192	166	142	173	158	247	213	240	221	171	177	172	206	174	167	204	185	164	151	157	140	196	187	207	177	180	198	188	176
ENSG00000059145	71	60	63	61	66	70	94	71	136	122	119	123	109	93	92	95	106	114	119	107	70	76	69	76	112	115	126	118	92	78	94	87	89	80	70	66	95	46	64	69	99	99	100	98	92	99	78	71
ENSG00000059377	11	10	16	7	20	18	11	18	7	9	11	11	7	13	12	8	11	3	9	14	14	18	20	26	14	7	8	9	9	11	4	10	8	10	8	8	19	13	22	21	7	8	5	9	12	10	7	8
ENSG00000059378	110	86	107	105	98	110	101	88	85	92	100	81	91	109	77	75	98	89	119	100	118	97	116	87	69	67	62	74	103	77	96	81	86	99	106	97	105	104	129	95	90	84	90	67	80	86	84	98
ENSG00000059573	446	475	526	491	396	402	392	428	550	482	515	504	500	463	490	470	575	520	554	485	422	423	397	404	483	405	470	485	434	444	463	487	513	469	507	479	397	403	382	371	410	448	488	424	512	461	493	451
ENSG00000059588	474	455	487	502	429	471	431	436	349	384	405	351	344	338	312	359	398	355	384	338	406	403	429	388	399	385	405	372	434	379	440	404	419	443	466	400	386	367	414	382	365	331	362	349	438	381	396	387
ENSG00000059691	64	58	59	50	50	57	71	46	54	58	68	72	89	111	80	68	72	55	70	75	63	65	69	72	56	73	65	74	71	80	76	66	72	64	72	64	58	70	54	48	60	71	65	77	68	79	75	78
ENSG00000059728	56	52	37	38	44	46	40	39	46	32	50	46	47	44	45	44	50	43	36	44	41	39	50	53	33	41	47	39	43	42	34	44	46	38	45	45	39	33	38	39	35	42	38	51	43	50	34	46
ENSG00000059758	100	74	99	103	89	75	76	104	71	61	75	69	71	79	77	79	65	86	59	68	96	90	98	84	59	72	59	75	90	71	66	76	121	95	107	95	88	75	96	88	96	68	88	69	83	72	66	74
ENSG00000059769	27	22	32	20	18	17	21	17	13	14	23	20	24	13	21	20	20	15	16	14	22	19	13	24	24	23	21	23	21	31	32	28	32	25	23	23	20	23	24	20	9	22	21	19	14	20	18	18
ENSG00000059804	97	86	97	84	125	108	125	126	119	107	114	98	118	104	111	100	121	93	110	101	140	121	158	136	110	104	115	106	92	92	94	87	68	76	88	74	99	74	99	83	116	89	89	93	114	95	71	82
ENSG00000059915	1	9	4	3	5	5	2	3	11	8	6	13	7	9	10	6	10	3	10	11	9	7	4	7	15	4	6	8	5	3	5	12	8	11	4	5	2	9	4	7	11	13	5	12	7	7	8	10
ENSG00000060069	77	64	72	80	80	65	73	56	131	119	127	107	113	121	104	83	87	118	111	114	90	88	80	92	98	86	109	111	112	114	116	100	87	94	121	93	74	89	78	87	105	92	97	104	92	110	107	112
ENSG00000060138	329	326	320	285	268	258	260	236	371	332	380	330	320	316	339	303	322	344	328	310	307	282	263	307	319	309	297	281	338	321	378	390	314	296	327	300	259	263	291	268	372	337	357	342	320	312	341	275
ENSG00000060140	1	0	0	0	0	0	1	0	0	0	0	0	1	0	1	1	0	1	0	0	2	1	0	2	0	0	0	0	0	0	0	0	0	1	0	1	0	0	1	3	0	0	2	0	0	1	0	1
ENSG00000060237	932	869	926	911	927	965	975	936	893	818	862	858	871	822	859	854	921	823	896	842	874	849	918	851	861	812	936	891	916	847	857	939	937	883	882	878	935	966	946	972	800	832	856	790	985	919	922	915
ENSG00000060303	1	1	0	0	0	0	1	0	0	0	0	0	1	0	0	1	0	0	0	0	0	0	0	1	0	0	0	0	0	0	0	1	0	0	0	0	0	0	0	0	0	0	0	0	0	0	0	1
ENSG00000060339	494	452	467	479	473	388	414	391	353	329	362	344	363	386	357	339	381	334	367	334	375	396	380	364	340	349	326	302	382	429	440	402	396	418	446	365	394	413	391	372	326	336	317	353	407	400	423	408
ENSG00000060491	179	155	158	163	137	144	151	135	278	279	261	278	250	248	236	242	274	270	264	260	200	186	186	184	245	227	238	237	248	224	229	249	232	222	238	204	189	175	202	191	231	227	222	250	255	232	257	251
ENSG00000060558	260	251	254	252	233	217	257	193	440	489	458	479	452	405	420	409	432	417	432	447	301	321	344	339	394	368	403	340	377	370	396	374	294	273	277	344	295	248	258	279	316	302	345	303	347	345	379	389
ENSG00000060566	0	0	0	0	1	1	0	1	0	0	0	0	0	0	0	1	0	0	1	1	0	1	0	1	0	0	0	0	0	0	0	0	0	0	1	0	1	1	0	0	0	0	0	0	0	0	0	0
ENSG00000060642	28	26	28	12	25	32	32	32	29	24	23	28	29	25	26	20	26	16	28	25	28	21	34	21	23	31	18	25	21	18	28	18	19	19	14	18	30	30	28	25	24	22	21	22	24	22	20	20
ENSG00000060656	0	0	1	0	2	2	3	3	3	2	2	1	1	3	2	1	2	2	3	2	6	3	0	5	1	4	1	1	1	2	3	1	1	2	0	1	1	3	0	1	3	1	5	1	1	2	1	1
ENSG00000060688	239	237	225	211	177	170	179	184	184	230	208	170	215	197	224	259	237	211	232	223	195	165	194	156	185	181	180	187	224	211	230	230	211	220	189	181	174	195	178	178	186	201	166	191	243	220	224	207
ENSG00000060709	0	0	0	0	0	0	0	0	0	0	0	0	0	0	0	0	0	0	0	0	0	0	0	0	0	0	0	0	0	0	0	0	0	0	0	0	0	0	0	0	0	0	0	0	0	0	0	0
ENSG00000060718	0	0	0	0	1	0	0	0	0	0	0	0	0	0	0	0	0	0	0	0	0	0	0	0	0	0	0	0	0	0	0	0	0	1	0	0	0	0	0	0	0	0	0	0	0	0	0	0
ENSG00000060749	345	307	325	300	371	300	365	313	210	201	190	192	253	258	256	278	212	188	217	225	309	251	261	285	238	209	226	215	282	237	274	275	270	252	268	244	285	292	297	290	204	220	224	218	291	292	266	279
ENSG00000060762	65	68	62	72	54	56	71	56	42	41	48	45	51	54	53	57	57	51	50	46	64	63	81	64	46	44	42	50	54	60	72	62	70	79	59	65	54	71	63	70	44	55	45	52	58	75	52	60
ENSG00000060971	68	76	75	88	83	85	92	98	152	127	120	123	121	141	144	133	143	120	116	139	114	133	129	104	128	123	115	117	120	119	128	103	124	113	135	100	97	116	114	98	132	124	133	117	120	119	124	123
ENSG00000060982	3286	3176	3381	3201	2986	2887	3142	2964	2673	2476	2660	2514	3011	2932	3002	2864	2529	2436	2587	2476	2986	2889	2830	2843	2769	2630	2676	2619	3360	3371	3428	3305	3145	2982	3036	3102	2739	2603	2650	2505	2764	2642	2826	2663	3102	2917	3060	2960
ENSG00000061273	146	160	155	165	99	115	133	92	279	243	252	230	196	188	223	174	221	262	278	278	147	163	164	155	253	241	222	216	205	185	188	182	190	187	207	194	147	142	143	147	195	192	199	201	215	187	215	173
ENSG00000061337	7	4	4	8	22	22	18	12	5	5	10	5	7	10	3	10	9	6	9	11	16	14	20	21	4	8	4	6	7	2	6	6	6	6	2	11	18	20	18	17	5	2	5	4	12	7	8	10
ENSG00000061455	0	0	0	1	1	0	0	2	1	0	0	0	0	1	0	0	0	0	1	0	1	0	0	0	0	0	0	0	1	0	0	0	0	0	0	0	1	0	0	0	0	0	1	0	1	1	0	1
ENSG00000061492	4	5	7	11	32	33	33	28	4	4	9	8	19	15	15	21	14	8	14	9	42	38	35	43	11	12	6	17	33	28	32	31	14	12	16	11	39	37	52	50	9	6	7	13	30	27	28	28
ENSG00000061656	6	3	5	6	5	5	13	4	6	9	7	6	6	6	10	5	7	7	5	9	7	11	14	7	11	10	14	10	12	4	5	4	8	3	3	5	7	7	4	10	10	4	5	7	4	1	12	2
ENSG00000061676	0	1	0	0	2	2	0	1	1	1	2	0	0	0	1	0	1	0	1	1	0	0	1	1	0	1	2	1	1	1	1	1	1	0	1	0	1	1	2	0	0	0	0	0	0	0	1	0
ENSG00000061794	225	203	223	246	182	153	209	149	156	143	172	124	164	161	168	155	151	138	156	127	152	179	155	166	155	134	128	164	170	192	177	189	212	173	196	187	166	163	159	178	153	148	173	151	180	154	193	191
ENSG00000061918	17	13	22	20	17	14	14	22	12	15	10	8	15	9	13	17	13	11	9	13	15	19	18	13	11	13	15	10	20	20	12	9	14	19	13	18	7	12	13	11	11	4	18	12	14	12	18	8
ENSG00000061936	204	199	201	200	138	146	144	143	245	223	213	238	212	207	209	213	255	252	269	213	179	153	198	155	207	205	217	225	222	186	197	219	200	192	202	210	180	166	158	171	225	193	210	205	213	211	208	205
ENSG00000061938	119	111	123	124	92	88	108	102	223	209	207	205	143	130	150	150	186	215	206	219	121	143	126	114	201	186	215	195	144	141	158	156	172	164	142	137	133	97	148	122	148	164	159	153	170	126	131	139
ENSG00000061987	174	162	159	181	177	162	153	170	132	126	138	137	122	131	131	121	161	150	118	124	146	155	158	150	147	163	157	170	153	161	153	170	157	139	161	157	146	152	148	161	166	138	132	132	158	139	155	165
ENSG00000062038	0	1	3	1	1	2	1	0	3	1	0	2	1	0	0	0	2	3	2	3	2	4	1	2	0	2	2	2	0	2	1	1	0	4	3	1	4	1	4	2	0	1	1	0	0	0	1	1
ENSG00000062096	0	0	0	0	1	0	0	0	0	0	0	0	1	0	0	0	0	0	0	0	0	0	0	0	0	0	0	0	0	0	0	0	0	0	0	0	0	0	0	0	0	0	0	0	0	0	0	0
ENSG00000062194	434	439	416	429	364	332	392	334	324	302	346	325	337	318	293	309	294	272	314	299	347	317	341	302	311	316	338	349	353	322	367	353	383	367	376	364	320	316	322	309	331	334	315	310	317	339	351	352
ENSG00000062282	16	16	14	12	19	16	15	23	17	20	20	18	18	14	15	14	20	17	20	21	28	21	26	14	22	14	22	13	15	11	21	11	9	20	13	17	30	17	17	15	14	17	13	21	19	20	15	12
ENSG00000062370	0	0	0	0	0	0	0	0	0	0	0	0	0	0	0	0	0	0	0	0	0	0	0	0	0	0	0	0	0	0	0	0	0	0	0	0	0	0	0	0	0	0	0	0	0	0	0	0
ENSG00000062485	623	564	590	563	416	371	412	402	551	505	539	525	442	430	465	421	585	576	520	565	373	372	352	324	532	529	520	509	482	451	461	446	547	532	552	525	413	370	360	382	515	467	488	484	494	444	469	467
ENSG00000062524	82	98	88	87	129	138	154	135	139	141	121	129	141	127	118	119	111	92	147	121	158	176	163	181	124	110	115	104	127	113	113	133	85	100	100	83	166	131	150	144	90	97	101	84	117	131	120	119
ENSG00000062582	2	4	8	4	3	1	4	1	13	7	4	6	3	2	9	5	2	6	7	7	4	5	5	4	3	10	6	5	2	4	2	6	2	7	7	0	4	2	2	3	5	5	4	1	7	5	3	0
ENSG00000062598	76	70	82	81	80	69	86	78	73	60	76	73	91	72	74	73	90	73	78	92	73	80	90	86	67	70	64	60	61	72	78	68	78	68	68	81	99	104	91	76	54	71	73	68	89	81	74	76
ENSG00000062650	624	594	601	607	519	479	498	498	447	484	488	455	479	468	512	525	460	488	511	464	490	433	477	442	492	470	495	464	562	537	560	544	601	546	583	552	512	477	498	458	503	448	476	487	515	477	560	505
ENSG00000062716	149	134	131	126	154	134	159	147	106	98	115	91	112	88	125	112	100	84	108	96	136	137	134	125	112	99	105	91	124	107	116	96	133	139	118	118	130	141	143	125	106	97	108	96	108	105	104	130
ENSG00000062725	115	107	109	85	116	96	120	108	106	74	104	93	78	74	84	90	78	97	80	78	102	84	104	84	92	91	90	93	100	94	124	96	118	98	115	90	91	92	86	88	92	98	105	86	85	76	88	85
ENSG00000062822	292	289	335	299	315	261	330	279	616	624	666	667	578	559	593	557	568	553	636	593	419	417	443	425	513	463	497	481	544	475	581	552	407	410	375	407	404	355	403	369	455	431	463	459	555	584	571	568
ENSG00000063015	1	3	1	1	3	5	1	4	2	3	1	3	1	1	2	0	2	3	5	5	5	6	6	0	1	4	4	2	3	4	1	2	0	4	2	1	1	4	5	3	3	3	3	2	0	1	3	0
ENSG00000063046	2236	2088	2201	2110	1713	1603	1761	1633	1974	1822	1884	1844	2035	1886	1984	1870	1991	1777	1889	1861	1708	1686	1657	1605	1865	1748	1807	1740	1951	1924	1998	1779	1881	1833	1868	1869	1503	1425	1536	1484	1833	1704	1796	1805	1896	1808	1861	1841
ENSG00000063127	2	1	2	1	7	5	2	4	1	0	1	1	1	1	1	0	1	1	3	0	0	4	2	3	1	2	3	1	1	0	4	1	1	3	4	2	2	2	3	1	0	2	1	3	3	1	5	1
ENSG00000063169	49	34	47	41	40	36	34	32	65	56	68	76	45	40	34	55	67	61	51	71	47	57	50	38	48	46	45	56	64	38	53	48	70	67	59	58	43	61	52	55	54	65	60	51	57	52	57	40
ENSG00000063176	37	36	30	31	39	36	31	33	66	53	53	54	58	48	45	36	57	51	55	62	59	35	41	39	48	71	47	55	57	57	64	48	50	50	48	52	44	52	31	48	40	35	31	45	53	56	47	53
ENSG00000063177	1482	1408	1509	1392	1247	1202	1294	1216	2662	2538	2556	2605	2411	2290	2538	2372	2508	2482	2617	2526	1663	1607	1741	1606	2299	2196	2312	2186	2151	2060	2078	2050	1685	1699	1657	1631	1443	1410	1460	1455	2065	1932	2051	2018	2305	2205	2400	2257
ENSG00000063180	15	8	11	8	16	12	14	5	18	15	16	20	9	7	13	15	22	14	20	11	7	9	10	10	11	8	14	25	10	10	10	10	16	8	15	10	9	6	12	7	10	13	9	12	11	13	10	12
ENSG00000063241	56	61	54	34	41	35	54	45	113	104	100	108	115	83	122	109	116	83	109	104	53	59	70	56	72	82	78	62	83	90	98	103	76	61	67	62	59	74	63	63	85	67	65	85	98	116	106	103
ENSG00000063244	593	577	609	572	500	525	565	525	985	974	969	946	937	861	906	924	971	939	1034	947	711	638	765	690	861	819	874	803	948	861	935	868	788	706	762	747	629	626	640	647	812	727	758	760	943	878	830	862
ENSG00000063245	237	221	222	200	206	176	199	215	381	382	395	387	306	341	293	297	367	334	333	336	279	275	291	260	280	312	328	257	300	271	342	332	286	259	282	278	272	248	259	255	280	291	290	286	276	309	300	295
ENSG00000063322	101	95	107	106	118	80	104	104	115	115	118	100	123	121	120	112	138	129	146	140	108	109	119	121	132	135	152	122	135	126	129	133	118	115	132	115	118	101	140	101	101	95	106	111	141	139	149	137
ENSG00000063438	9	9	4	10	9	9	9	9	13	16	13	19	15	17	13	14	21	26	12	23	11	10	11	13	24	17	21	29	15	11	15	10	15	10	10	18	12	14	12	10	15	17	16	18	8	19	20	10
ENSG00000063515	0	0	0	0	0	0	0	0	0	0	0	0	0	0	0	0	0	0	0	0	0	0	0	0	0	0	0	0	0	0	0	0	0	0	0	0	0	0	0	0	0	0	0	0	0	0	0	0
ENSG00000063587	127	115	101	116	122	115	115	104	132	137	142	130	106	104	122	93	114	107	121	124	112	105	111	114	121	105	112	103	87	94	123	90	134	118	102	126	113	108	100	103	129	124	134	114	108	122	111	112
ENSG00000063601	68	67	77	72	81	91	85	90	69	66	76	45	72	74	64	62	77	59	73	61	93	86	79	87	74	60	75	64	76	61	77	56	77	69	71	58	99	87	83	86	63	80	64	67	65	70	82	61
ENSG00000063660	4	6	3	8	10	7	5	7	10	13	8	13	11	11	12	5	13	7	11	8	13	10	9	12	6	7	12	8	8	8	6	7	7	10	4	5	10	6	13	13	14	10	11	7	7	15	7	9
ENSG00000063761	16	10	8	14	11	9	13	12	15	9	19	16	11	10	8	10	24	17	17	16	9	8	17	5	8	9	11	9	8	10	9	14	15	12	11	10	10	13	7	13	11	9	11	4	10	14	11	13
ENSG00000063854	28	39	42	38	30	27	36	34	69	42	55	53	49	49	48	62	52	43	48	42	40	33	43	43	50	50	52	52	43	39	38	55	43	53	49	50	48	46	33	47	49	36	45	49	54	52	43	47
ENSG00000063978	200	218	192	178	155	180	200	169	203	213	186	204	230	211	226	231	217	220	234	201	199	186	213	179	197	179	203	163	208	192	195	219	186	213	183	190	207	197	191	178	181	162	186	213	225	224	221	224
ENSG00000064012	132	107	125	107	99	103	90	133	89	83	87	97	83	82	107	91	92	84	93	98	94	99	117	97	126	95	120	99	110	94	107	101	111	121	117	128	105	112	104	111	105	92	101	89	92	93	111	105
ENSG00000064042	1	0	1	0	0	0	0	0	1	0	0	0	0	0	0	0	0	0	0	0	0	0	0	0	0	0	1	0	0	1	0	0	0	0	0	0	0	0	1	0	0	1	0	0	0	1	1	0
ENSG00000064102	241	234	231	262	209	211	200	185	215	208	190	181	188	162	220	207	175	192	200	179	199	205	206	203	213	173	190	174	196	177	203	215	235	213	253	229	179	185	177	158	189	199	207	175	187	173	185	191
ENSG00000064115	267	268	254	236	284	271	287	240	211	191	207	216	211	216	211	193	190	236	215	199	273	265	289	270	187	187	221	211	283	208	252	232	251	220	263	235	284	270	256	239	205	182	244	211	205	211	199	244
ENSG00000064195	0	0	0	0	0	0	0	0	0	0	0	0	0	0	0	0	0	0	0	0	0	0	0	0	0	0	0	0	0	0	0	0	0	0	0	0	0	0	0	0	0	0	0	0	0	0	0	0
ENSG00000064199	16	5	14	13	9	9	8	7	9	6	11	10	8	10	9	8	13	10	9	7	7	5	9	5	8	8	8	5	14	17	14	14	10	11	12	21	8	6	7	4	9	9	6	8	11	15	10	5
ENSG00000064201	4	3	3	1	1	3	3	4	7	10	4	3	4	6	6	12	7	4	8	9	4	7	3	8	4	6	4	5	11	4	1	6	1	1	3	1	4	5	5	5	4	5	4	4	8	12	6	7
ENSG00000064205	1	1	0	4	1	0	1	3	1	2	2	1	3	3	0	0	3	1	2	2	2	4	2	1	2	1	4	2	2	1	0	3	3	1	2	0	5	6	3	3	0	0	2	0	1	1	0	0
ENSG00000064218	0	0	0	0	0	0	0	0	0	0	0	0	0	0	0	0	0	0	0	0	0	0	0	0	0	0	0	0	0	0	0	0	0	0	0	0	0	0	0	0	0	0	0	0	0	0	0	0
ENSG00000064225	0	0	0	1	2	0	3	1	0	1	0	1	1	1	1	0	0	0	1	0	1	0	1	0	0	0	0	0	2	0	0	0	0	1	0	0	0	2	0	1	0	0	0	0	2	0	0	0
ENSG00000064270	1	1	1	0	1	3	3	0	1	2	4	4	1	0	1	2	0	3	2	1	5	2	2	4	0	1	1	2	2	3	1	0	0	1	1	1	2	2	1	5	0	1	1	0	2	5	1	1
ENSG00000064300	0	1	0	0	1	1	3	2	0	1	1	2	1	1	1	0	1	1	1	2	4	2	0	1	0	1	0	1	0	1	1	3	0	0	0	0	1	3	2	1	1	0	1	0	0	1	0	0
ENSG00000064309	8	13	7	12	11	12	9	10	9	8	9	5	8	4	7	8	3	9	9	4	7	14	8	7	10	12	5	10	8	8	5	7	7	12	5	10	12	8	10	9	7	7	7	4	6	7	12	7
ENSG00000064313	210	213	229	223	207	199	220	244	172	167	161	154	222	175	194	181	180	173	154	173	211	182	182	212	170	172	154	156	173	195	170	184	228	177	181	218	200	195	196	206	159	180	159	148	206	212	186	176
ENSG00000064393	272	239	258	281	258	258	290	276	276	245	279	296	244	241	225	221	285	250	278	258	243	231	290	225	254	209	265	240	247	202	245	238	285	263	247	265	252	279	268	248	235	249	219	238	240	233	263	248
ENSG00000064419	427	447	458	424	333	289	353	293	451	405	399	408	402	323	402	345	409	412	441	433	315	282	323	320	431	428	398	425	371	348	367	333	420	428	439	400	278	297	330	308	361	407	376	411	379	339	349	355
ENSG00000064489	2	1	0	0	1	0	0	2	2	1	2	2	2	1	0	2	1	2	4	3	0	0	3	0	1	3	0	0	0	0	1	2	1	2	1	0	0	2	1	2	3	0	3	2	2	2	1	1
ENSG00000064490	48	47	42	53	36	48	44	55	87	80	70	81	70	72	85	89	86	83	89	97	60	56	61	69	85	83	71	83	61	63	71	68	67	61	57	63	65	63	57	48	42	64	70	73	75	85	78	84
ENSG00000064545	68	78	56	60	69	63	56	58	115	143	122	119	124	111	113	112	130	112	125	116	105	75	87	101	124	90	116	100	90	86	111	105	94	88	92	82	85	75	95	72	80	87	113	100	125	104	114	138
ENSG00000064547	52	40	40	33	36	41	38	39	71	67	74	64	55	49	57	68	58	68	67	57	63	49	51	52	66	72	77	79	59	58	53	52	44	49	34	45	41	41	51	29	53	56	61	56	45	54	67	66
ENSG00000064601	93	64	73	90	80	100	97	92	99	122	114	112	114	122	102	118	132	125	121	123	82	111	86	110	137	115	120	128	136	94	118	115	119	112	99	122	70	91	89	93	99	92	106	98	123	111	113	130
ENSG00000064607	451	435	443	441	403	381	409	411	490	423	464	451	439	399	452	418	479	433	481	459	439	406	430	443	476	485	457	457	449	433	452	435	482	418	417	390	384	407	385	428	443	409	423	391	486	473	468	449
ENSG00000064651	151	139	151	161	165	154	146	142	94	113	92	91	97	87	107	115	119	132	131	104	133	145	142	146	103	113	89	98	142	153	136	146	150	146	134	159	154	158	156	127	114	124	133	134	118	116	147	104
ENSG00000064652	3	5	5	6	8	6	4	7	6	5	2	2	3	3	2	2	5	3	7	5	2	4	6	5	4	4	7	3	4	3	2	3	5	3	6	0	8	5	5	6	5	4	0	4	7	2	4	1
ENSG00000064655	0	0	0	0	0	0	0	0	0	0	0	0	0	0	0	0	0	0	0	0	0	0	0	0	0	0	0	0	0	0	0	0	0	0	0	0	0	0	0	0	0	0	0	0	0	0	0	0
ENSG00000064666	17	12	17	14	56	48	53	44	24	13	22	22	50	30	48	38	31	22	31	16	56	64	79	70	33	27	22	23	28	27	37	41	23	23	23	26	95	69	91	80	23	24	21	17	44	37	39	50
ENSG00000064687	59	57	60	69	89	81	98	98	93	74	104	79	82	70	80	69	81	81	110	80	114	108	126	132	90	82	82	82	82	91	82	95	55	67	81	70	109	116	116	109	73	66	55	59	71	97	71	85
ENSG00000064692	0	0	1	0	0	0	0	0	0	0	0	0	0	0	0	0	0	0	0	0	0	0	0	0	0	0	1	0	0	0	0	1	0	0	0	0	0	0	0	0	0	0	0	0	0	0	0	0
ENSG00000064703	117	122	144	134	129	110	110	121	85	103	85	86	118	98	102	101	97	86	92	86	98	123	114	108	64	93	83	70	98	89	107	120	134	113	119	122	137	103	127	123	99	92	98	91	110	102	107	101
ENSG00000064726	441	415	471	427	415	383	432	370	295	296	306	327	344	325	320	302	259	278	252	312	433	383	417	395	274	272	265	300	412	358	382	392	398	434	441	406	382	412	411	403	365	328	349	358	349	293	342	353
ENSG00000064763	119	124	116	125	87	70	81	65	77	65	99	70	99	79	97	82	81	91	91	87	71	61	72	84	80	78	97	72	99	91	111	102	84	83	104	94	76	63	49	60	93	82	81	85	105	91	96	108
ENSG00000064787	0	2	3	0	0	4	7	3	2	2	1	1	0	1	4	5	0	2	2	1	5	10	6	8	2	0	1	1	3	0	2	0	4	1	2	2	6	5	9	6	2	2	3	2	3	2	1	2
ENSG00000064835	0	0	0	0	0	0	0	0	0	0	0	0	0	0	0	0	0	0	0	0	0	0	0	0	0	0	0	0	0	0	0	0	0	0	0	0	0	0	0	0	0	1	0	0	0	0	0	0
ENSG00000064886	69	62	66	61	78	72	83	68	52	63	72	55	69	59	64	68	53	61	63	58	95	88	89	79	64	70	53	79	67	71	77	81	66	57	69	57	63	74	63	90	70	49	60	61	71	75	91	77
ENSG00000064932	108	97	121	99	120	108	124	127	206	235	226	239	193	155	176	162	217	197	224	201	160	145	135	129	177	165	202	164	171	153	160	138	158	137	141	148	132	130	152	132	182	152	176	154	169	163	181	176
ENSG00000064933	133	122	126	136	89	108	115	107	86	87	92	85	93	74	75	77	94	74	83	83	98	104	115	111	102	104	83	91	122	98	120	92	98	119	129	118	104	107	104	117	81	93	97	102	102	84	112	102
ENSG00000064961	126	147	143	151	144	165	125	124	228	227	250	249	224	222	290	218	221	200	214	222	183	141	178	163	211	209	212	195	239	212	237	261	190	178	195	186	170	145	161	167	196	219	209	193	201	219	226	222
ENSG00000064989	8	5	7	9	3	5	3	5	2	5	3	3	3	0	3	5	4	1	5	2	2	3	5	6	9	6	5	9	6	2	4	3	8	8	5	9	5	0	6	5	1	10	4	7	5	4	4	5
ENSG00000064995	127	102	85	93	63	80	76	73	88	74	67	94	84	84	84	84	102	84	86	68	91	82	71	81	112	90	93	106	93	94	99	92	104	96	107	95	62	70	74	83	100	77	91	94	113	84	110	101
ENSG00000064999	93	91	98	89	62	63	73	81	125	111	135	119	105	96	89	100	129	123	138	102	86	84	90	80	110	117	142	126	103	95	84	89	98	100	105	103	74	74	83	77	102	104	104	85	112	91	103	113
ENSG00000065000	289	300	308	301	252	302	289	226	474	411	443	476	395	398	428	396	497	461	494	491	330	311	339	304	409	401	422	434	410	370	438	360	388	376	411	383	364	322	332	333	411	366	378	335	404	385	416	363
ENSG00000065029	78	79	90	75	69	77	77	70	123	131	160	131	132	128	129	123	141	121	114	121	102	90	114	88	115	99	151	121	112	130	124	130	72	114	83	94	90	88	99	98	107	98	82	104	135	123	110	130
ENSG00000065054	3	3	2	10	4	7	7	7	21	11	16	14	13	11	13	8	12	7	9	6	7	11	10	10	11	8	9	9	5	4	5	4	4	11	4	2	12	4	14	11	7	16	14	11	7	8	4	7
ENSG00000065057	53	52	39	51	44	33	31	33	85	89	77	89	82	76	84	66	86	79	102	81	77	46	46	54	70	65	71	75	61	71	57	70	62	54	67	59	37	45	44	38	69	54	68	45	77	86	75	70
ENSG00000065060	222	189	204	220	163	174	172	161	199	200	203	181	158	150	160	145	172	176	218	214	161	159	169	169	199	175	196	199	193	165	151	185	177	176	213	216	157	152	156	131	180	184	205	163	187	165	146	166
ENSG00000065135	286	217	285	256	274	221	259	222	220	197	209	193	248	216	222	242	204	195	214	210	223	218	236	221	240	205	211	184	273	256	264	231	262	217	223	208	261	235	230	213	218	191	216	233	244	228	242	218
ENSG00000065150	1421	1356	1472	1401	1171	1080	1132	1107	1090	1026	1084	1104	1246	1167	1182	1181	1102	1000	1104	1085	1073	1086	1028	1036	1059	922	1052	990	1204	1219	1331	1197	1257	1179	1209	1177	1072	991	1029	1003	1096	1024	1089	1034	1199	1194	1198	1206
ENSG00000065154	1	1	0	0	0	1	0	0	0	0	2	0	0	0	0	0	0	0	0	0	0	1	0	0	0	0	0	0	0	0	0	0	0	0	0	0	0	0	0	1	0	0	0	0	0	0	0	0
ENSG00000065183	395	349	353	359	288	278	267	268	235	225	269	282	303	280	310	263	238	251	254	289	259	268	256	232	244	257	248	252	291	294	295	254	308	262	340	268	264	257	244	239	262	224	281	244	292	272	309	260
ENSG00000065243	165	165	160	166	166	167	149	163	115	109	111	98	132	126	120	106	113	110	120	96	142	153	153	144	114	100	111	131	153	119	150	119	130	142	114	146	164	145	149	143	109	106	112	123	122	140	130	127
ENSG00000065268	120	98	119	106	77	107	103	100	221	214	224	242	201	181	208	206	181	215	216	199	160	139	150	126	183	180	150	170	207	176	195	180	146	171	196	167	110	101	109	113	169	168	163	171	195	176	180	182
ENSG00000065308	375	355	419	375	429	399	427	389	416	361	404	359	357	363	337	371	363	370	378	420	387	397	412	398	379	338	375	404	360	374	389	376	374	365	371	395	418	350	397	342	377	350	343	358	404	383	391	379
ENSG00000065320	2	2	2	5	3	6	8	2	14	3	4	4	4	7	10	2	3	10	6	6	9	6	13	16	7	9	4	3	4	5	4	7	4	5	5	6	9	10	13	3	3	6	2	3	10	5	8	4
ENSG00000065325	2	0	2	0	0	0	0	0	0	2	0	1	0	0	0	1	0	1	1	2	0	1	0	0	0	1	2	0	0	1	0	0	0	1	0	0	0	0	0	0	0	1	1	1	1	0	1	0
ENSG00000065328	261	216	244	239	269	264	289	242	200	199	211	180	215	224	242	195	192	211	242	175	255	271	249	252	152	187	183	164	207	221	225	206	218	202	203	193	254	224	255	228	208	181	185	188	209	199	224	210
ENSG00000065357	91	87	71	71	89	71	77	78	92	104	95	93	82	59	70	78	92	79	112	96	78	78	79	74	82	94	101	80	46	65	63	64	75	57	67	67	74	89	70	75	96	109	84	87	95	79	75	81
ENSG00000065361	1	0	0	2	2	0	0	0	0	1	0	0	1	1	0	0	1	1	0	2	0	0	1	1	0	1	0	0	0	0	1	1	1	0	2	1	2	3	1	1	0	1	1	0	1	0	1	1
ENSG00000065371	0	0	0	0	0	0	0	0	0	0	0	0	0	0	0	0	0	0	0	0	0	0	0	0	0	0	0	0	0	0	0	0	0	0	0	0	0	0	0	0	0	0	0	0	0	0	0	0
ENSG00000065413	35	41	40	38	56	61	65	49	34	24	44	30	31	33	31	42	28	30	27	34	49	50	52	42	39	26	47	27	27	38	32	30	29	34	30	26	43	44	51	37	30	21	27	35	31	34	44	32
ENSG00000065427	486	467	510	493	372	401	396	373	440	429	458	404	490	471	490	475	509	437	438	502	403	384	408	390	401	419	390	397	434	439	476	431	450	452	472	399	384	362	400	372	414	396	404	362	485	480	489	515
ENSG00000065457	85	77	75	73	66	76	81	72	53	50	73	62	59	55	72	53	55	62	85	66	68	70	77	78	70	60	59	55	63	77	78	76	81	75	68	61	59	76	57	49	59	50	53	44	74	81	70	76
ENSG00000065485	18	21	22	20	19	23	19	16	20	21	17	19	21	20	22	21	16	30	23	20	16	11	13	17	19	31	21	17	24	26	25	17	18	19	27	27	20	25	16	15	25	32	19	22	34	27	22	25
ENSG00000065491	30	37	45	44	47	31	39	35	48	39	37	44	53	39	46	39	33	43	35	57	37	32	33	39	42	36	45	55	39	44	58	41	34	47	38	35	43	30	38	47	42	33	26	43	47	42	49	42
ENSG00000065518	159	124	169	143	115	114	103	114	163	169	157	168	167	179	179	168	187	160	173	179	129	122	152	118	170	174	185	174	162	159	201	173	171	166	181	159	116	133	117	110	163	159	156	164	153	166	165	167
ENSG00000065526	981	936	933	987	772	776	798	802	1102	963	992	993	992	949	983	915	1108	1051	1088	991	734	731	797	719	1059	948	1003	1038	1015	965	964	982	900	915	959	893	809	807	813	781	905	864	938	869	1119	1038	1106	1015
ENSG00000065534	10	15	10	16	29	32	25	30	15	18	20	23	20	23	11	31	18	15	22	27	27	35	34	33	17	17	19	21	36	28	20	29	15	17	19	10	32	41	32	28	19	18	22	12	30	29	28	25
ENSG00000065548	315	279	317	281	190	178	182	174	201	192	181	197	162	213	215	185	225	217	190	212	202	176	204	217	213	195	205	186	247	216	241	229	265	258	263	267	193	221	226	211	196	179	190	208	236	224	205	216
ENSG00000065559	99	99	92	85	64	73	85	79	59	59	63	63	77	79	87	85	83	74	69	58	69	83	77	72	78	71	51	71	91	87	79	76	96	99	100	92	83	70	90	97	83	63	70	83	80	63	96	95
ENSG00000065600	63	67	81	76	53	58	70	65	67	66	71	59	63	78	70	50	74	64	59	55	54	53	51	68	54	46	57	66	63	51	59	78	68	52	54	68	71	60	55	52	70	59	65	69	64	64	69	83
ENSG00000065609	0	0	0	0	0	0	0	0	0	0	0	0	0	0	0	0	0	0	0	0	0	0	0	0	0	0	0	0	0	0	0	0	0	0	0	0	0	0	0	0	0	0	0	0	0	0	0	0
ENSG00000065613	203	207	183	207	191	196	177	160	174	154	175	156	133	137	177	151	166	170	171	172	179	186	192	186	168	163	169	150	177	156	198	177	171	178	209	201	187	174	138	166	179	129	150	150	176	163	160	186
ENSG00000065615	88	75	78	76	90	78	91	73	64	47	59	65	75	73	88	72	60	65	50	61	75	70	71	76	74	68	77	55	84	65	84	77	64	71	77	86	86	78	84	65	59	66	61	58	87	73	69	65
ENSG00000065618	0	1	0	0	0	0	0	0	1	0	0	0	1	0	0	1	0	0	0	0	0	0	0	0	0	0	0	0	0	1	0	0	0	0	0	0	0	0	1	0	1	0	0	1	0	0	1	1
ENSG00000065621	1	1	1	0	1	2	3	0	0	1	0	1	1	1	1	0	0	4	3	0	3	1	1	0	0	1	2	1	0	1	1	1	3	2	0	0	1	1	2	1	2	0	0	0	2	0	1	0
ENSG00000065665	43	39	45	38	26	33	30	35	28	27	38	28	19	23	27	31	27	31	28	23	34	24	28	33	46	28	24	27	26	32	25	27	35	28	26	36	30	20	27	24	32	33	29	23	19	23	27	30
ENSG00000065675	30	55	53	45	43	29	38	35	34	48	48	37	41	32	29	40	45	42	44	44	42	40	48	49	42	39	42	35	38	42	48	34	45	39	46	45	38	38	41	47	40	42	56	39	27	33	35	40
ENSG00000065717	0	2	1	1	0	1	2	1	2	0	1	1	1	0	0	1	1	1	0	2	0	1	1	0	1	0	1	2	0	1	1	2	1	1	2	1	1	3	2	1	0	0	0	0	0	1	2	3
ENSG00000065802	133	103	112	94	104	100	114	90	134	131	163	137	125	131	146	137	148	164	156	154	113	118	108	99	155	140	128	135	134	132	116	129	116	115	138	137	108	93	94	108	142	119	132	157	154	149	127	146
ENSG00000065809	705	686	766	742	734	692	713	672	578	551	528	551	654	615	652	651	568	532	545	564	718	705	714	622	599	551	608	644	652	624	663	640	716	650	725	689	640	626	663	623	634	611	677	624	601	586	623	623
ENSG00000065833	0	0	0	0	0	1	0	0	0	0	0	0	0	0	0	0	2	1	0	0	0	0	1	1	0	0	0	1	1	0	0	0	0	1	0	0	2	2	2	2	2	1	0	1	0	0	0	1
ENSG00000065882	524	497	546	518	514	508	553	481	515	516	563	533	514	516	459	475	546	566	589	519	557	515	575	483	524	530	559	501	548	486	553	486	543	559	568	554	505	532	527	528	488	511	512	519	519	481	513	530
ENSG00000065883	172	172	191	184	149	195	144	160	194	158	184	198	165	170	158	165	172	184	174	150	165	172	168	140	169	166	162	149	202	169	187	187	181	194	198	178	171	164	178	188	179	151	174	143	179	166	183	169
ENSG00000065911	753	685	715	695	476	482	483	463	521	450	488	504	469	439	480	468	519	507	514	538	459	480	447	459	514	500	484	495	518	470	474	485	651	607	688	653	481	451	462	408	536	494	562	498	468	474	473	502
ENSG00000065923	46	39	54	49	66	64	54	64	39	37	44	42	50	32	41	39	36	30	38	33	57	45	59	55	35	45	41	37	34	44	32	53	47	36	52	35	54	44	46	53	50	40	28	33	43	49	39	44
ENSG00000065970	124	111	89	93	94	88	83	85	141	114	120	108	100	88	89	88	113	119	93	120	80	88	84	79	96	122	93	79	81	90	96	70	101	104	99	94	84	78	92	94	110	88	104	98	97	99	87	86
ENSG00000065978	2129	2060	2122	1973	1530	1476	1526	1426	2124	1996	2100	1950	2287	2085	2208	2139	2091	1913	2051	1947	1797	1753	1789	1720	1666	1668	1678	1659	2246	2145	2252	2128	2107	2080	2187	2117	1755	1723	1705	1649	1875	1812	1875	1791	2183	2025	2166	2032
ENSG00000065989	86	76	78	74	72	78	74	69	116	113	118	110	84	92	87	101	114	107	131	132	82	72	96	84	111	129	126	141	107	108	113	100	120	122	124	88	92	82	85	102	114	104	93	103	100	100	111	118
ENSG00000066027	214	213	238	239	223	187	224	241	170	170	161	161	187	186	192	155	174	155	158	140	220	214	216	187	200	198	162	160	229	208	221	186	241	213	236	227	220	191	201	198	209	214	233	187	192	186	170	201
ENSG00000066032	0	0	0	0	0	0	0	0	0	0	0	0	0	0	0	0	0	0	0	0	0	0	0	0	0	1	0	0	0	0	0	0	0	0	0	0	0	0	0	0	0	0	0	0	0	0	0	0
ENSG00000066044	469	445	481	495	355	327	339	337	453	427	402	417	407	402	405	412	476	444	489	452	356	345	365	358	383	379	410	385	461	394	435	377	445	444	466	436	378	362	382	358	422	364	387	360	451	431	432	437
ENSG00000066056	16	12	17	19	48	51	56	53	29	26	25	17	30	26	37	34	27	20	31	16	68	58	57	56	22	27	21	16	19	23	31	22	9	7	14	5	50	47	50	41	13	26	22	13	29	35	25	25
ENSG00000066084	316	287	337	305	243	269	295	286	309	263	279	275	258	245	245	259	301	263	306	248	260	259	255	220	283	271	287	283	257	262	290	254	276	261	278	269	267	262	261	236	269	286	289	263	256	256	258	260
ENSG00000066117	328	285	340	367	240	206	223	247	351	294	338	281	282	311	322	307	361	354	311	353	253	234	268	206	295	288	303	307	298	295	288	325	300	291	296	357	296	267	234	256	290	280	268	279	296	307	306	297
ENSG00000066135	200	226	197	180	142	127	159	162	203	185	234	207	191	160	183	159	206	217	233	226	164	143	152	163	201	206	204	190	182	171	168	153	191	205	210	205	154	164	147	166	187	174	195	192	201	169	162	170
ENSG00000066136	112	88	95	94	115	85	107	79	142	127	156	121	130	119	130	115	138	153	142	125	98	94	126	100	141	130	140	116	114	127	143	116	122	133	125	92	116	94	121	108	112	92	108	111	112	115	132	133
ENSG00000066185	4	5	6	6	8	7	6	7	3	5	4	2	2	5	6	4	2	7	3	4	5	6	12	2	3	3	2	8	5	5	0	3	3	5	3	5	4	4	3	4	3	5	5	2	3	6	1	2
ENSG00000066230	11	11	15	8	11	11	7	3	26	26	22	16	17	15	5	8	20	26	16	18	5	8	10	13	15	22	22	16	9	13	13	9	8	13	18	14	4	7	5	5	12	12	13	14	5	11	17	12
ENSG00000066248	0	0	0	0	0	0	1	1	0	0	0	0	0	0	0	0	2	0	0	0	0	0	0	0	0	0	0	0	0	1	1	0	0	0	1	0	0	0	0	0	0	0	0	0	0	0	0	0
ENSG00000066279	533	500	505	500	489	513	528	517	443	405	392	405	488	432	473	499	420	438	393	400	525	509	487	475	438	356	377	365	523	602	617	615	470	484	468	400	528	506	458	511	368	369	344	383	609	563	588	569
ENSG00000066294	29	32	36	26	50	49	79	49	25	25	26	34	31	20	36	30	18	35	23	25	48	41	45	44	28	30	34	30	39	26	39	48	22	20	30	20	51	38	45	50	20	35	17	24	32	40	34	40
ENSG00000066322	157	140	160	140	124	128	145	126	196	180	187	168	192	164	173	166	184	185	208	197	159	151	146	155	167	158	181	164	159	145	171	142	165	150	194	170	137	130	134	136	167	164	129	178	187	175	190	170
ENSG00000066336	89	87	102	104	101	99	100	104	179	167	195	170	139	122	122	140	154	159	175	165	138	163	114	135	146	158	162	156	133	121	164	104	128	124	120	136	102	113	124	123	151	152	134	136	134	125	114	117
ENSG00000066379	26	26	44	30	23	25	25	34	44	39	49	50	57	48	58	53	54	45	52	44	31	29	35	35	48	38	39	47	43	48	40	38	33	37	25	36	27	27	25	25	45	24	39	40	46	44	50	49
ENSG00000066382	0	0	0	1	1	1	1	1	3	0	1	1	0	1	1	3	1	0	1	2	3	1	0	1	0	0	1	0	2	0	3	0	1	0	1	0	1	1	0	1	0	0	1	0	0	0	0	1
ENSG00000066405	0	0	0	1	0	0	0	0	0	1	0	0	0	0	0	0	0	0	0	0	1	0	0	0	0	0	0	0	0	0	0	0	0	0	0	1	0	1	1	0	0	0	0	0	1	0	0	0
ENSG00000066422	158	134	182	146	154	135	134	136	98	110	104	94	96	135	113	121	102	107	119	104	139	131	129	113	113	103	93	87	116	110	103	118	138	160	135	129	134	157	139	139	108	105	116	105	136	146	128	131
ENSG00000066427	204	167	190	163	155	148	145	163	117	110	121	124	106	133	133	116	115	144	117	117	115	137	160	131	144	136	177	142	136	150	130	143	168	165	190	148	152	145	121	136	155	141	143	128	120	129	128	144
ENSG00000066455	73	60	70	79	80	75	73	67	54	53	48	61	60	58	50	51	54	57	51	53	60	70	65	62	84	53	65	62	65	62	67	67	57	60	67	54	69	55	72	64	63	61	46	79	61	67	65	63
ENSG00000066468	0	0	0	0	0	0	0	1	0	0	1	0	0	0	0	0	0	0	0	1	0	0	0	0	2	0	0	0	0	0	0	0	0	0	0	0	0	0	0	1	0	0	0	0	2	0	0	0
ENSG00000066557	124	116	141	114	102	84	102	109	96	94	84	90	85	82	91	79	72	77	90	63	93	103	119	113	84	90	74	89	120	110	96	86	104	94	110	96	99	105	83	84	85	78	91	89	92	83	87	96
ENSG00000066583	71	72	80	74	56	50	45	38	66	77	66	52	59	59	39	62	50	51	66	45	38	50	45	46	67	48	46	54	58	56	45	65	82	65	72	72	54	46	41	35	52	68	59	57	56	69	59	50
ENSG00000066629	1	1	0	1	0	0	0	0	0	1	0	0	0	0	0	0	0	0	0	0	0	0	0	0	1	0	0	0	0	0	0	0	1	0	0	0	0	0	0	0	0	0	0	0	0	0	0	0
ENSG00000066651	59	43	51	46	42	41	51	60	33	42	48	24	41	21	38	40	34	39	32	33	54	34	46	37	34	33	43	38	31	39	48	41	43	46	36	41	33	38	32	43	47	46	45	41	44	29	38	31
ENSG00000066654	214	214	192	224	171	165	162	161	169	143	150	156	178	168	168	159	155	155	157	135	159	145	130	143	142	151	138	157	144	163	174	178	207	167	208	193	142	139	170	171	165	139	166	177	172	164	156	176
ENSG00000066697	33	45	47	28	36	38	29	31	32	42	31	25	35	28	33	28	35	31	36	26	46	38	29	33	32	33	36	32	36	31	37	32	45	42	51	32	44	36	54	37	52	36	38	36	33	33	32	36
ENSG00000066735	43	47	34	50	33	38	36	29	84	90	79	78	57	56	47	61	63	82	98	74	47	52	53	53	46	83	81	48	53	48	61	54	54	60	61	71	34	52	43	54	76	71	89	69	50	52	54	54
ENSG00000066739	200	183	194	177	196	164	169	198	158	163	182	146	193	164	142	144	147	135	167	159	179	140	166	150	162	156	151	153	168	155	169	190	161	169	170	171	170	169	175	182	159	132	163	155	179	180	177	163
ENSG00000066777	497	496	501	444	490	465	543	487	400	398	400	400	430	380	443	403	428	371	389	363	429	429	484	421	449	445	444	414	490	451	453	464	465	446	463	459	440	404	429	427	427	391	406	427	435	415	413	407
ENSG00000066813	0	0	0	0	0	0	0	0	0	0	0	0	0	0	0	0	0	0	0	0	0	0	0	0	0	0	0	0	0	0	0	0	0	0	0	0	0	0	0	0	0	0	0	0	0	0	0	0
ENSG00000066827	49	37	30	35	31	30	32	26	62	55	39	48	58	46	60	36	49	69	59	59	32	42	40	37	40	31	50	40	42	52	45	59	35	46	39	38	42	52	43	36	41	37	42	40	44	52	28	45
ENSG00000066855	101	109	103	112	86	82	70	69	83	72	73	81	72	79	77	63	69	60	70	65	65	77	71	91	82	84	64	68	79	75	74	79	94	102	83	74	72	69	58	83	73	83	83	82	67	82	73	68
ENSG00000066923	29	33	27	31	23	19	23	21	26	28	38	32	25	27	33	28	31	32	28	36	22	30	27	23	37	33	33	38	23	22	19	27	33	24	35	28	19	26	23	27	34	36	31	28	17	35	32	29
ENSG00000066926	75	73	93	82	80	72	76	61	73	68	85	69	78	63	79	61	60	64	66	60	63	75	67	76	75	61	73	75	73	79	82	75	93	86	66	71	82	73	84	80	70	67	65	73	69	66	82	58
ENSG00000066933	193	159	166	173	168	167	216	169	134	123	145	156	140	119	146	144	157	146	150	141	156	147	168	148	156	159	150	162	151	183	160	143	139	145	155	143	150	141	127	145	157	130	166	144	132	136	171	138
ENSG00000067048	0	0	0	0	0	0	0	0	0	0	0	0	0	0	0	0	0	0	0	0	0	0	0	0	0	0	0	0	0	0	0	0	0	0	0	0	0	0	0	0	0	0	0	0	0	0	0	0
ENSG00000067057	495	426	437	411	451	381	437	430	966	966	972	951	751	741	782	739	809	842	867	842	621	552	555	580	891	848	876	883	705	661	654	690	518	490	514	498	428	446	421	458	718	678	701	657	696	666	677	679
ENSG00000067064	731	655	728	702	458	436	524	458	469	416	476	407	453	409	440	456	469	425	447	429	554	486	534	501	506	441	461	462	471	515	497	484	600	595	671	659	475	507	472	475	554	487	525	488	481	439	483	413
ENSG00000067066	102	112	141	133	125	128	137	117	102	94	104	67	101	87	93	92	110	109	119	105	109	101	105	129	120	122	124	103	116	96	106	101	118	95	116	96	112	108	124	112	101	111	123	92	112	99	116	110
ENSG00000067082	102	83	102	98	83	71	88	74	118	101	106	86	99	99	95	105	96	113	111	95	69	70	80	73	150	126	115	132	113	100	109	120	113	107	96	91	86	84	73	83	104	112	95	83	100	94	81	103
ENSG00000067113	12	10	15	7	13	11	13	12	7	15	8	11	5	7	6	5	8	10	12	16	7	12	12	13	7	10	5	7	10	12	9	15	13	8	10	12	16	11	13	15	10	10	11	13	6	8	8	8
ENSG00000067141	42	46	55	42	56	48	50	47	48	51	45	46	54	37	33	42	45	50	44	55	56	61	49	48	60	53	44	48	43	54	56	40	43	44	49	48	53	45	48	51	45	45	44	35	41	41	38	44
ENSG00000067167	754	758	788	806	681	621	721	639	527	518	552	489	568	504	559	548	501	464	498	481	577	605	601	574	556	475	521	492	692	648	629	650	776	673	750	741	621	621	675	608	610	573	581	597	564	516	609	598
ENSG00000067177	0	0	0	0	0	0	0	0	0	0	0	0	1	0	0	0	0	1	0	1	0	1	0	1	0	1	0	0	0	0	0	1	1	0	0	0	1	0	0	0	0	3	1	0	0	0	0	0
ENSG00000067182	37	39	28	34	60	60	75	66	65	53	70	64	67	62	57	69	64	58	47	49	80	64	71	67	69	59	49	56	58	52	63	67	40	50	41	50	76	53	71	60	62	43	55	48	50	78	68	58
ENSG00000067191	43	37	29	31	39	27	33	36	54	52	55	44	44	49	39	44	59	45	46	70	45	53	52	32	53	68	81	64	45	46	48	47	52	48	45	49	34	46	46	39	44	56	44	47	50	36	42	56
ENSG00000067208	45	31	36	27	40	38	49	44	21	26	31	36	24	30	27	24	26	33	30	33	32	28	46	32	36	27	42	28	30	35	41	21	44	34	32	47	32	37	33	42	40	40	31	32	33	27	33	43
ENSG00000067221	10	17	20	9	14	18	16	9	25	15	15	20	23	20	26	19	21	19	21	20	25	25	16	21	21	15	23	24	21	14	25	24	24	21	12	16	18	16	17	20	19	12	19	13	24	24	21	31
ENSG00000067225	3247	3258	3447	3184	3237	3081	3289	3054	5808	5573	5717	5623	5296	5169	5412	5142	5400	5032	5478	5085	4136	3855	4146	3924	5344	4988	5405	5147	4895	4619	4810	4648	3626	3497	3665	3580	3296	3221	3370	3276	4320	4163	4519	4321	4961	4840	4969	4824
ENSG00000067248	141	118	128	138	83	91	106	104	67	71	77	59	86	78	75	86	80	86	92	84	102	86	93	113	85	71	92	79	93	105	99	94	103	129	105	110	114	97	90	115	89	76	103	86	91	93	87	98
ENSG00000067334	204	210	218	208	124	142	147	156	149	132	142	130	164	136	141	143	160	151	154	139	191	157	147	138	137	132	137	131	168	168	199	177	207	178	183	179	184	151	167	146	133	145	157	120	198	179	186	179
ENSG00000067365	104	115	94	88	107	101	91	106	142	145	159	136	120	113	147	123	157	141	162	148	119	111	105	102	150	117	134	149	121	118	95	87	115	112	118	126	94	91	97	105	105	105	121	122	107	129	143	108
ENSG00000067369	228	240	253	230	248	216	233	248	225	237	252	226	233	207	195	244	245	217	240	235	246	208	231	252	235	272	253	237	212	224	235	242	214	207	222	202	226	200	211	207	207	210	210	220	250	208	238	221
ENSG00000067445	1	1	1	1	0	0	1	0	0	0	0	0	0	1	0	1	0	0	0	1	0	0	0	0	2	1	1	0	2	1	0	1	1	0	2	2	1	4	1	0	1	0	1	2	0	1	0	1
ENSG00000067533	102	107	99	99	72	94	70	71	67	61	64	42	75	68	71	58	83	51	76	68	63	62	49	61	74	57	46	76	73	72	58	75	90	79	90	66	86	61	70	70	61	49	71	62	72	76	66	54
ENSG00000067560	1229	1259	1306	1274	1142	1055	1105	1067	1141	1133	1144	1082	1059	1128	1110	1155	1160	1084	1120	1157	1124	986	971	1011	1088	1091	1051	1036	1161	1120	1169	1175	1233	1081	1186	1132	1092	977	1084	1052	1051	1012	1040	1102	1232	1173	1190	1139
ENSG00000067596	175	176	194	151	145	158	169	144	177	186	167	174	176	173	171	174	209	171	199	181	172	141	161	164	186	163	136	172	192	169	151	172	178	141	180	190	158	172	149	169	158	144	162	161	190	190	215	164
ENSG00000067601	8	4	5	10	4	1	8	5	3	3	6	6	2	9	6	4	8	1	6	7	0	3	4	9	6	8	7	5	7	5	6	4	3	8	4	4	5	1	1	4	9	2	3	1	7	3	3	5
ENSG00000067606	1	4	3	1	4	3	1	3	4	3	3	2	7	6	1	8	6	3	1	7	5	3	6	2	9	4	6	4	2	1	3	5	4	4	4	5	3	3	0	2	3	2	2	3	3	4	2	2
ENSG00000067646	0	2	0	1	0	1	0	1	1	1	0	1	0	1	1	0	1	1	0	1	0	0	0	1	1	0	0	2	1	1	1	0	0	0	0	1	0	0	0	0	0	0	0	1	0	2	0	1
ENSG00000067704	427	423	386	409	293	283	305	258	315	291	348	345	313	320	303	300	370	322	317	310	289	277	301	273	337	330	317	322	367	339	334	336	383	379	335	385	299	249	266	273	314	346	343	328	340	374	313	313
ENSG00000067715	127	123	142	112	158	125	144	130	114	107	116	111	110	98	105	102	112	107	121	109	150	133	153	136	102	118	148	109	122	118	123	128	123	144	89	134	167	136	141	131	103	101	106	116	132	124	131	113
ENSG00000067798	2	1	5	5	2	4	2	7	6	1	6	2	3	1	2	6	4	3	0	3	3	4	8	5	3	4	3	6	1	0	0	2	4	2	1	3	2	2	5	3	2	4	4	3	3	3	4	1
ENSG00000067829	53	64	68	70	60	68	77	68	129	124	136	122	119	116	96	106	116	109	123	120	90	93	78	87	111	113	117	111	89	107	117	90	78	78	68	98	90	79	83	84	75	85	80	92	116	100	102	110
ENSG00000067836	50	40	31	34	39	26	28	27	63	55	63	60	49	69	63	54	47	71	64	56	29	53	41	41	60	61	49	55	42	49	48	49	43	41	40	34	33	40	32	36	41	46	49	41	63	50	77	56
ENSG00000067840	0	1	0	0	1	0	4	0	0	2	0	2	1	0	2	0	2	2	2	1	3	0	3	1	1	0	0	0	0	0	0	0	1	0	2	2	1	0	1	1	0	0	0	0	1	1	1	0
ENSG00000067842	1	1	3	1	3	4	3	2	2	6	4	5	2	7	2	1	6	5	8	1	5	9	1	6	5	6	3	3	2	2	1	2	1	3	3	1	4	2	2	0	8	2	5	5	1	4	2	2
ENSG00000067900	410	395	421	432	415	380	394	418	344	269	319	341	359	278	326	346	352	306	315	271	385	327	401	355	300	303	270	299	395	335	362	351	349	355	350	365	365	327	365	356	273	284	265	280	337	347	327	341
ENSG00000067955	600	567	587	561	544	482	528	540	400	403	393	335	433	375	392	427	344	370	427	374	549	494	522	500	358	353	373	395	500	459	503	470	567	533	525	509	564	548	531	500	450	436	459	413	410	396	461	432
ENSG00000067992	40	39	32	39	45	42	46	55	42	36	41	37	35	37	48	42	39	31	37	30	41	46	47	59	40	44	41	40	44	45	49	39	40	31	38	36	46	40	40	54	32	42	28	44	38	41	44	28
ENSG00000068001	16	16	16	15	18	18	10	19	16	23	26	21	21	28	41	37	32	25	21	33	27	23	32	13	32	22	31	16	30	27	28	30	14	22	22	21	21	29	30	27	12	17	24	20	27	32	32	32
ENSG00000068024	70	61	69	60	58	60	54	51	91	102	83	87	77	62	85	83	92	88	95	80	63	59	68	71	88	97	86	73	61	64	71	70	66	73	83	67	53	57	51	60	82	73	92	84	79	67	48	69
ENSG00000068028	170	130	148	138	175	187	174	152	258	219	261	259	231	205	234	217	236	235	248	268	213	205	212	208	221	245	224	229	199	184	214	217	158	145	143	153	166	203	175	196	223	177	231	190	220	210	219	208
ENSG00000068078	0	0	0	0	0	0	0	0	0	0	1	1	0	0	0	0	0	0	0	0	1	0	0	0	0	1	0	0	1	0	0	0	0	0	0	0	0	0	1	0	2	0	0	0	0	0	0	0
ENSG00000068079	25	18	14	16	22	15	19	12	26	21	33	16	22	35	24	27	32	22	23	21	32	18	24	20	22	23	18	34	19	16	25	21	22	16	18	21	22	21	23	26	21	19	28	22	22	23	27	33
ENSG00000068097	23	27	30	21	31	28	33	19	28	21	21	26	20	22	18	25	34	31	27	22	18	38	29	38	25	28	37	27	26	20	31	19	24	28	29	21	21	27	26	24	34	20	30	28	26	23	29	16
ENSG00000068120	166	136	143	142	126	98	128	115	240	238	259	229	221	196	216	192	251	235	270	267	134	149	171	142	243	197	228	211	211	194	216	180	194	171	167	191	145	142	172	141	183	195	191	188	217	228	209	203
ENSG00000068137	66	68	74	57	67	71	86	68	125	137	164	156	97	94	110	80	127	115	125	136	104	82	89	67	125	98	136	118	111	102	101	97	93	86	107	88	70	63	68	69	123	121	105	104	84	78	80	73
ENSG00000068305	507	490	504	459	561	538	574	560	456	386	393	397	443	416	454	402	396	412	434	396	536	545	560	506	416	399	419	417	467	435	450	438	460	462	474	439	576	541	569	535	434	373	398	426	457	407	460	383
ENSG00000068308	148	140	133	133	102	118	135	104	191	185	191	183	167	149	175	147	202	192	213	184	127	136	113	136	179	154	179	188	145	169	164	174	164	149	146	150	130	126	131	147	174	149	165	160	189	160	172	190
ENSG00000068323	52	34	48	41	47	35	62	45	80	75	92	63	66	70	60	73	81	82	91	70	65	48	51	63	73	73	65	63	71	59	66	60	56	66	53	75	56	47	53	57	57	61	62	76	73	80	52	54
ENSG00000068354	71	65	65	59	66	48	45	64	123	119	119	123	99	102	106	110	109	107	101	118	69	85	86	78	139	130	117	104	102	85	89	99	79	71	82	67	61	69	70	73	96	78	98	99	111	101	97	86
ENSG00000068366	262	260	267	282	313	313	298	303	184	204	166	180	229	218	248	220	176	202	196	193	272	290	264	268	187	191	203	190	257	247	238	251	290	229	245	257	324	277	299	265	188	194	216	200	228	226	222	214
ENSG00000068383	49	45	50	47	34	36	36	32	45	53	63	61	45	63	52	48	51	58	65	51	36	39	35	41	73	67	75	51	69	49	45	44	48	36	56	48	41	35	39	45	47	59	47	40	44	44	61	51
ENSG00000068394	37	40	38	33	31	24	14	34	47	67	58	47	55	46	66	55	53	49	68	50	28	32	29	36	62	42	42	48	59	49	41	51	42	33	32	35	36	33	35	33	48	49	42	40	48	48	50	50
ENSG00000068400	155	149	170	165	160	135	177	139	214	221	236	228	184	169	156	161	218	216	224	219	187	152	174	193	257	264	240	242	189	178	177	182	172	162	180	169	152	144	169	159	220	186	188	178	181	195	194	168
ENSG00000068438	102	102	100	109	88	75	71	64	114	100	109	117	110	111	119	121	124	108	119	89	84	93	109	90	81	104	122	104	115	107	119	123	129	96	107	113	94	65	103	92	106	92	98	117	120	107	118	113
ENSG00000068489	255	243	268	231	198	197	228	209	209	180	198	187	207	166	229	220	226	219	245	185	199	182	194	162	209	174	192	184	220	164	217	224	230	211	221	236	183	179	179	190	215	193	215	180	202	190	209	175
ENSG00000068615	0	1	0	0	2	1	1	0	1	1	0	0	1	2	0	0	1	0	0	1	1	1	1	1	0	1	0	1	2	1	1	2	1	0	0	0	1	1	0	0	2	1	1	1	0	0	1	0
ENSG00000068650	346	345	340	347	393	333	361	340	426	426	436	422	356	345	365	362	432	454	427	399	380	336	324	342	388	366	447	397	400	347	347	327	431	414	412	431	376	384	385	388	396	382	373	381	361	357	374	362
ENSG00000068654	353	349	386	369	276	265	255	262	401	366	440	407	374	350	352	354	467	447	468	413	312	269	293	260	348	338	389	348	384	371	368	341	404	389	445	377	327	327	349	300	356	328	361	326	369	353	450	377
ENSG00000068697	194	178	202	216	230	215	224	188	174	164	174	165	224	219	198	168	181	168	174	157	231	216	208	197	203	194	211	181	200	203	208	198	194	214	183	213	204	208	219	203	206	202	182	179	217	199	208	213
ENSG00000068724	531	555	543	538	431	390	444	473	964	854	947	905	747	748	742	733	895	862	876	798	561	529	603	496	874	781	826	761	769	664	727	707	719	679	724	701	564	568	542	524	738	730	758	686	772	697	778	736
ENSG00000068745	164	158	180	152	150	129	153	155	202	204	206	189	208	178	179	203	199	216	206	184	172	154	192	148	183	205	207	190	183	172	201	166	186	188	172	158	167	136	159	145	181	175	174	174	196	192	217	200
ENSG00000068781	0	0	0	0	0	0	0	0	0	0	0	0	0	0	0	0	0	0	0	0	0	0	0	0	0	0	0	0	0	0	0	0	0	0	0	0	0	0	0	0	0	0	0	0	0	0	1	0
ENSG00000068784	58	57	45	42	70	69	58	65	30	33	30	30	44	38	39	34	36	28	43	39	63	50	61	76	24	39	35	24	57	42	51	37	62	43	40	47	62	55	61	64	33	25	37	33	42	43	48	53
ENSG00000068796	287	318	364	281	288	283	296	283	283	210	219	230	235	263	242	221	233	216	231	225	298	255	277	258	225	219	239	204	312	291	293	327	268	276	266	283	259	235	269	296	240	252	217	211	285	280	294	280
ENSG00000068831	289	250	274	233	220	221	246	197	516	482	524	504	409	369	400	395	462	463	479	459	268	256	330	242	433	443	461	405	368	358	406	393	353	340	363	339	260	234	244	232	366	375	380	374	404	347	410	371
ENSG00000068878	426	357	414	379	334	351	334	310	249	242	249	237	266	254	298	266	271	278	292	260	296	318	330	293	260	233	256	216	313	311	298	317	358	318	344	348	309	292	306	327	272	265	277	283	285	285	312	282
ENSG00000068885	48	61	54	48	59	51	56	51	42	33	32	59	27	40	36	33	22	37	24	38	48	51	46	58	37	45	53	36	50	27	41	42	46	39	41	39	52	41	39	56	38	43	39	43	35	28	38	38
ENSG00000068903	96	87	101	94	105	91	93	102	155	138	173	156	138	131	140	131	139	133	151	141	121	137	109	141	154	144	142	150	121	115	132	116	97	106	123	97	113	112	127	108	126	122	130	122	130	135	126	155
ENSG00000068912	120	91	121	108	80	76	84	82	74	77	78	75	79	84	79	77	82	65	72	84	85	84	81	77	83	61	81	77	93	78	96	93	103	110	83	88	85	96	80	84	75	67	82	80	82	90	101	71
ENSG00000068971	14	13	11	14	11	18	14	11	20	41	29	32	17	16	17	18	16	20	23	20	14	19	20	26	24	33	35	26	14	12	18	14	10	14	16	12	11	15	17	14	25	14	25	21	17	14	13	16
ENSG00000068976	5	8	2	4	2	4	4	6	8	3	5	10	5	3	5	1	6	6	1	3	4	2	5	3	7	3	10	7	10	2	5	3	5	7	2	3	3	4	5	6	2	4	3	8	3	4	2	7
ENSG00000068985	0	0	0	0	0	0	0	0	0	0	0	0	0	0	0	0	0	0	0	0	0	0	0	0	0	0	0	0	0	0	0	0	0	0	0	0	0	0	0	0	0	0	0	0	0	0	0	0
ENSG00000069011	0	0	0	0	0	1	0	0	0	0	0	0	0	0	0	0	1	0	0	0	0	0	0	0	1	0	0	0	1	0	0	0	0	1	0	0	0	0	0	0	0	0	0	0	0	0	0	0
ENSG00000069018	0	0	0	0	0	0	0	0	0	0	0	0	0	0	0	0	0	0	0	1	0	0	0	0	0	0	0	0	1	0	0	0	0	0	0	0	0	0	0	0	0	0	0	0	0	0	0	0
ENSG00000069020	47	46	43	51	64	68	66	62	45	46	46	49	62	56	54	50	58	52	65	52	74	54	67	73	32	56	42	51	52	59	54	53	51	46	60	48	77	75	83	59	38	65	46	53	52	41	52	55
ENSG00000069122	0	0	0	0	0	0	0	0	0	0	0	0	0	0	0	0	0	0	0	0	0	0	0	0	0	0	0	0	0	0	0	0	0	0	0	0	0	0	0	0	0	0	0	0	0	0	0	0
ENSG00000069188	0	0	0	0	0	0	0	0	0	0	0	0	0	0	0	0	0	0	0	0	0	0	0	0	0	0	0	0	0	0	0	0	0	0	0	0	0	0	0	0	0	1	0	0	1	0	0	0
ENSG00000069206	0	0	0	0	0	0	0	0	0	0	0	0	0	0	0	0	0	0	0	0	0	0	0	0	0	0	0	0	0	0	0	0	0	0	0	0	0	0	0	0	0	0	0	0	0	0	0	0
ENSG00000069248	293	317	332	293	280	242	237	241	242	215	236	224	254	235	268	259	223	230	244	224	275	245	249	258	227	213	210	195	254	262	273	287	242	250	281	260	239	231	266	238	256	223	223	209	262	237	278	250
ENSG00000069275	2440	2261	2469	2314	1957	1810	1977	1843	1637	1505	1638	1562	1814	1788	1828	1710	1608	1501	1578	1471	1728	1648	1814	1637	1478	1402	1443	1372	2105	1921	2006	1871	1865	1920	1834	1768	1718	1599	1678	1682	1737	1623	1609	1593	1834	1738	1733	1738
ENSG00000069329	551	524	589	511	500	479	531	480	403	369	372	367	482	432	485	435	404	397	356	367	485	439	487	422	430	400	405	415	483	479	462	439	517	454	482	498	433	448	446	449	408	420	439	419	480	464	425	496
ENSG00000069345	259	220	245	232	217	202	206	170	209	177	194	186	201	215	211	246	199	181	203	218	209	193	206	198	176	177	181	174	195	216	234	216	228	229	233	230	209	232	215	200	221	204	188	182	261	244	254	208
ENSG00000069399	3	4	3	6	8	8	7	11	0	2	2	5	3	1	5	5	3	4	1	1	5	1	4	5	2	0	2	2	3	5	1	7	6	2	3	3	11	6	5	10	2	2	5	0	2	7	2	1
ENSG00000069424	402	422	402	382	374	352	391	371	853	839	852	849	713	654	719	634	788	752	797	753	517	506	561	483	821	831	812	848	626	594	608	629	506	516	506	533	409	482	406	415	665	671	642	681	633	618	684	622
ENSG00000069431	10	14	6	9	15	13	16	8	7	9	11	4	6	10	8	4	9	7	8	5	14	10	5	12	17	10	13	11	3	5	13	13	5	8	8	10	7	7	13	8	4	5	7	11	9	11	4	14
ENSG00000069482	0	0	0	0	0	0	0	0	0	0	0	0	0	0	0	0	0	0	0	0	0	0	0	0	0	0	0	0	0	0	0	0	0	0	0	0	0	0	0	0	0	0	0	0	0	0	0	0
ENSG00000069493	584	529	572	556	509	470	471	443	437	412	410	386	471	438	454	444	447	421	434	410	406	411	467	449	464	422	441	455	518	507	538	491	515	514	466	458	418	404	422	392	461	389	429	423	488	511	452	478
ENSG00000069509	54	42	57	47	42	50	50	45	36	36	46	47	29	45	51	46	30	31	39	37	39	46	50	41	34	38	51	41	49	50	44	43	45	45	37	49	58	41	54	49	47	39	40	43	44	54	50	35
ENSG00000069535	0	0	0	0	0	0	0	0	0	0	0	0	0	0	0	0	0	0	0	0	0	0	0	0	0	0	0	0	0	0	0	0	0	0	0	0	0	0	0	0	0	0	0	0	0	0	0	0
ENSG00000069667	10	7	7	10	19	23	17	14	14	14	10	8	14	14	21	21	12	13	6	16	28	19	13	16	14	10	12	20	15	17	13	16	2	4	8	4	4	2	6	7	14	15	11	11	9	6	6	8
ENSG00000069696	1	3	3	3	2	3	6	1	5	0	3	5	1	4	2	0	3	9	2	2	2	1	2	2	2	3	2	3	3	2	5	2	4	2	6	3	2	5	1	0	3	1	4	3	0	1	2	2
ENSG00000069702	25	18	24	22	27	24	28	22	17	24	26	25	28	16	5	22	9	19	13	25	33	15	20	25	22	18	16	24	18	18	14	13	20	14	22	28	20	9	15	11	22	16	18	15	11	10	14	10
ENSG00000069712	7	17	3	6	11	17	9	8	10	7	8	4	5	3	7	10	6	6	9	4	9	18	11	14	12	9	10	16	8	10	9	10	8	7	7	19	9	11	16	15	11	9	10	8	5	11	12	11
ENSG00000069764	1	3	3	0	3	0	0	5	1	1	2	1	0	0	3	0	1	2	1	0	1	3	2	0	4	1	5	5	1	1	2	0	3	2	1	1	2	0	1	2	1	0	0	5	2	0	1	1
ENSG00000069812	5	8	3	4	5	12	3	7	2	15	4	4	9	2	10	6	5	8	10	7	4	8	6	13	6	4	10	2	9	3	5	7	7	4	7	10	7	7	8	6	4	6	3	7	4	5	3	5
ENSG00000069849	373	352	402	338	321	330	370	331	292	287	288	239	276	278	313	284	290	287	279	292	334	307	347	308	280	272	279	255	368	337	307	349	383	340	362	345	337	307	330	354	315	286	301	294	324	297	319	310
ENSG00000069869	68	59	59	61	77	77	83	79	26	36	40	41	56	38	52	49	52	41	39	61	71	67	75	79	64	52	52	47	60	47	58	51	67	54	47	61	68	67	74	77	52	48	43	54	50	66	43	53
ENSG00000069943	49	50	48	45	60	44	51	48	41	26	34	20	29	45	26	32	30	26	33	32	47	49	35	49	37	49	36	36	39	38	49	33	49	41	55	52	55	36	43	41	32	36	29	35	33	46	47	40
ENSG00000069956	146	117	133	133	113	104	119	103	79	89	81	74	90	93	81	84	87	106	88	85	102	117	102	69	89	86	78	73	103	81	108	107	104	123	111	89	112	101	102	105	90	99	103	77	103	105	97	88
ENSG00000069966	56	50	56	44	56	37	40	41	55	46	56	47	37	33	35	42	62	56	55	48	52	69	51	52	60	74	74	41	48	37	40	35	49	44	52	63	51	54	54	52	66	52	47	46	44	41	47	44
ENSG00000069974	90	77	88	69	97	109	122	95	52	55	63	56	61	71	66	67	60	43	52	66	119	100	103	104	70	52	74	52	79	68	80	79	51	71	67	66	114	93	104	109	70	45	63	47	85	78	80	69
ENSG00000069998	125	153	167	139	125	131	125	111	234	238	246	233	232	217	250	241	233	225	261	241	173	155	162	167	210	217	246	212	189	217	227	214	178	152	180	153	139	126	138	133	180	172	204	193	204	207	201	199
ENSG00000070010	113	128	134	121	110	104	136	106	129	105	97	79	112	108	115	107	126	122	126	106	120	110	117	119	126	88	109	101	126	113	112	98	119	116	117	113	119	103	113	99	88	107	98	101	117	107	120	115
ENSG00000070018	129	136	133	143	113	112	120	110	111	94	125	101	108	94	119	109	92	106	117	100	106	117	114	112	103	97	104	96	121	109	123	97	110	105	97	105	128	124	124	123	89	97	108	119	141	122	124	108
ENSG00000070019	0	2	0	0	1	2	0	1	0	0	0	0	0	1	0	0	0	0	0	0	4	2	2	1	0	1	1	0	0	1	0	0	0	0	0	0	0	0	1	3	1	0	0	0	0	0	1	0
ENSG00000070031	0	0	4	3	0	0	1	1	2	4	1	3	2	1	1	2	2	2	2	1	0	3	0	1	0	3	3	3	1	2	1	1	1	0	1	1	1	2	1	2	2	2	2	2	1	4	2	3
ENSG00000070047	203	206	231	239	206	212	216	185	406	357	402	375	368	316	338	326	378	374	374	387	313	281	282	265	323	311	327	336	330	278	320	308	276	262	289	294	267	274	286	265	281	271	317	280	348	351	332	334
ENSG00000070061	261	248	283	264	187	174	196	139	226	210	244	207	201	205	207	218	203	214	227	219	174	132	198	194	257	214	230	226	217	173	205	201	223	223	211	220	160	182	154	152	228	221	244	206	225	233	200	213
ENSG00000070081	821	743	797	733	789	801	798	788	591	550	581	564	642	632	644	572	591	524	533	545	765	697	791	686	615	577	612	563	655	633	676	640	706	686	679	689	725	659	735	699	658	584	627	585	656	614	632	597
ENSG00000070087	1	0	0	0	2	1	0	0	0	0	0	0	0	1	1	0	0	0	0	1	0	1	0	1	1	1	0	1	0	1	0	0	0	1	0	0	0	0	2	0	0	1	0	0	0	0	0	0
ENSG00000070159	1	0	0	0	1	3	1	1	0	0	2	0	1	0	0	1	2	2	0	2	0	0	1	2	1	1	1	2	0	0	0	0	0	1	0	0	1	0	0	1	0	0	0	0	1	0	1	0
ENSG00000070182	3	7	3	5	9	4	8	7	5	9	7	8	4	5	5	4	4	9	6	7	7	11	7	4	7	8	12	3	8	4	7	2	4	7	5	5	6	6	5	9	6	6	5	6	7	3	6	6
ENSG00000070190	24	23	13	15	22	24	31	24	13	21	20	14	23	16	15	22	18	19	21	10	30	33	17	31	19	17	20	14	17	13	21	18	19	18	18	6	35	22	30	27	13	13	17	16	23	16	18	16
ENSG00000070193	0	0	0	0	0	0	0	0	0	0	0	0	0	0	0	0	0	0	0	0	0	0	0	0	0	0	0	0	0	0	0	0	0	0	0	0	0	0	0	0	0	0	0	0	0	0	0	0
ENSG00000070214	304	290	311	286	251	295	299	269	220	205	193	179	222	199	208	243	227	202	232	239	268	238	231	248	239	248	223	237	277	255	266	251	287	263	295	267	202	209	228	210	260	200	264	229	220	216	219	225
ENSG00000070269	74	60	75	48	79	72	77	66	42	58	50	50	51	59	53	51	53	52	47	47	63	68	58	58	55	55	46	50	72	74	66	65	46	49	68	48	55	57	46	59	45	66	71	52	56	56	51	61
ENSG00000070366	162	137	153	123	151	139	151	153	176	192	211	191	154	149	160	170	210	186	157	156	158	183	166	153	211	182	185	179	165	172	148	163	148	150	175	127	149	139	162	137	150	137	131	165	172	175	179	180
ENSG00000070367	219	246	236	218	204	176	207	191	148	143	161	156	164	142	163	126	155	182	167	158	196	159	176	180	173	133	162	154	185	210	180	207	231	214	237	214	191	202	185	160	177	156	160	178	168	190	158	178
ENSG00000070371	29	22	35	29	39	24	41	36	40	38	37	31	36	24	30	31	31	38	21	33	41	40	43	41	37	46	34	29	33	26	29	31	32	31	27	20	40	44	30	38	28	22	22	28	33	31	30	43
ENSG00000070388	1	1	0	0	0	0	0	0	0	0	0	0	0	0	2	0	1	3	0	0	1	0	1	2	0	0	0	0	0	0	0	0	0	1	0	0	2	0	0	0	1	0	2	1	0	1	0	2
ENSG00000070404	15	24	21	14	14	17	27	20	36	34	58	37	31	25	29	28	32	32	44	35	31	24	30	29	33	26	40	26	28	35	27	34	31	23	31	35	21	21	25	10	30	36	36	25	20	27	33	25
ENSG00000070413	140	114	122	117	124	129	118	123	217	216	215	238	217	213	231	220	225	194	186	210	181	175	189	204	183	175	212	201	240	205	207	210	150	192	166	158	175	183	157	176	169	161	191	162	229	202	226	210
ENSG00000070423	107	87	100	87	88	73	77	81	152	152	143	142	152	122	135	115	154	142	155	146	107	111	125	97	108	94	121	118	154	153	158	148	137	133	150	123	94	90	135	99	134	140	128	128	126	131	137	138
ENSG00000070444	100	99	96	88	101	92	82	89	148	125	156	152	119	98	106	112	160	143	149	134	90	109	100	99	140	122	143	117	104	95	105	97	109	128	99	131	111	97	117	118	119	98	104	103	116	114	112	89
ENSG00000070476	133	83	108	92	88	112	122	102	135	129	149	135	124	118	109	106	134	137	131	134	123	128	136	126	149	142	159	124	111	110	121	118	134	128	127	119	118	119	146	125	131	113	124	118	165	110	142	116
ENSG00000070495	86	77	74	88	87	80	77	68	114	95	120	105	106	94	95	91	140	112	138	108	80	81	64	96	104	91	98	90	83	80	91	81	79	90	68	83	62	54	65	70	85	84	84	75	100	67	91	82
ENSG00000070501	74	97	91	82	67	64	74	54	51	47	66	71	74	69	65	68	75	71	48	57	61	61	70	54	58	59	67	69	65	76	78	71	93	67	67	76	58	62	59	57	66	71	61	70	64	71	81	68
ENSG00000070526	0	0	0	0	0	0	0	0	0	0	1	0	0	0	0	0	0	0	0	0	0	0	0	0	0	0	0	0	0	0	0	0	0	0	0	0	0	0	0	0	0	0	0	0	0	0	0	0
ENSG00000070540	11	7	7	9	12	15	8	22	4	2	9	7	11	9	2	7	13	6	3	6	10	8	11	16	9	8	8	11	6	8	7	7	10	8	10	11	17	9	15	11	6	11	7	10	5	6	6	9
ENSG00000070601	29	28	25	22	44	47	49	44	31	23	48	39	36	47	40	34	52	39	53	29	43	57	50	54	41	34	45	42	41	43	60	40	29	39	28	36	53	45	53	68	26	26	25	35	37	44	36	36
ENSG00000070610	107	93	93	108	95	73	74	87	157	145	126	144	141	119	120	128	158	118	143	134	109	118	105	109	123	122	133	122	137	133	108	110	111	93	100	95	99	80	96	96	110	109	101	133	142	101	134	131
ENSG00000070614	134	112	106	123	113	125	118	124	159	157	187	181	145	166	150	148	164	168	180	169	159	145	155	158	156	155	172	142	162	144	148	131	140	162	149	145	150	153	159	167	138	98	145	129	168	156	152	166
ENSG00000070669	74	72	56	42	39	34	43	43	42	45	52	54	47	39	51	47	46	68	46	69	36	26	39	43	59	52	60	55	44	55	37	57	52	56	47	73	34	34	28	39	59	70	72	55	45	57	40	53
ENSG00000070718	203	173	192	190	140	159	170	176	182	161	146	145	148	133	149	167	172	169	142	144	142	126	163	146	180	151	163	160	156	140	154	154	193	163	183	155	127	129	144	111	153	145	154	146	139	162	140	138
ENSG00000070729	0	0	0	0	0	0	0	0	0	0	0	0	0	0	0	0	0	0	0	0	0	0	0	0	0	0	0	0	0	0	0	0	0	0	0	0	0	0	0	0	0	0	0	0	0	0	0	0
ENSG00000070731	2	4	1	3	2	0	1	3	0	1	2	1	2	1	2	0	4	1	2	4	2	1	0	1	3	1	4	2	1	3	0	1	0	5	3	1	0	2	3	0	0	0	1	1	3	0	1	0
ENSG00000070748	1	0	3	1	3	1	1	2	1	0	0	0	1	0	1	1	1	1	0	1	1	2	1	3	0	1	2	1	3	2	0	0	2	1	2	1	3	2	1	3	1	0	0	0	0	0	1	5
ENSG00000070756	9959	9429	9797	9342	8180	7835	8523	7904	8856	8315	8786	8495	8709	8156	8705	8291	8672	8217	8561	8273	7770	7203	7607	7319	8251	7990	8280	7922	8672	8616	8766	8496	8961	8822	8968	8779	8249	7951	8245	7924	8166	7804	8030	7819	8963	8598	8856	8587
ENSG00000070759	13	13	23	12	14	16	17	16	21	12	9	18	17	18	13	14	11	18	16	12	17	21	20	25	23	9	17	17	16	15	20	10	10	9	5	10	13	11	17	14	13	10	9	16	15	23	17	11
ENSG00000070761	113	116	137	118	99	91	129	127	139	133	106	104	137	136	151	118	127	112	123	137	96	117	116	110	120	131	124	112	107	113	119	137	125	99	124	104	107	84	123	120	104	111	120	112	102	116	140	138
ENSG00000070770	429	434	478	440	324	299	340	327	319	298	337	307	297	321	338	321	369	367	354	382	288	297	334	300	331	348	360	339	377	349	354	365	423	391	424	395	328	309	342	305	373	341	373	342	351	355	342	351
ENSG00000070778	2	0	0	0	0	1	1	0	0	4	1	0	2	1	0	1	0	0	1	0	0	2	1	0	1	0	0	0	1	0	0	0	1	0	0	1	2	1	0	1	0	0	1	2	0	0	1	1
ENSG00000070785	83	79	95	79	46	60	59	59	44	52	64	58	69	62	87	58	45	58	81	56	53	60	34	64	52	56	68	47	57	63	51	59	84	58	64	63	48	66	58	49	60	46	45	41	75	61	59	56
ENSG00000070808	2	1	1	1	4	5	5	2	1	5	1	1	0	1	2	0	3	3	3	0	4	7	4	9	1	1	4	1	1	1	0	2	0	2	2	3	10	5	7	8	0	2	1	1	3	2	2	3
ENSG00000070814	461	410	398	460	314	346	335	357	624	581	626	601	556	551	547	544	673	627	640	683	498	427	462	478	464	473	536	497	520	530	549	543	482	555	546	522	531	448	456	427	439	432	521	469	542	529	553	486
ENSG00000070831	557	467	506	488	449	391	464	445	365	320	354	340	452	382	377	433	374	364	351	343	430	409	438	437	339	339	368	340	497	407	463	436	435	427	450	455	439	443	448	411	376	371	407	393	441	407	438	425
ENSG00000070882	92	66	86	82	99	81	91	75	69	56	87	65	79	68	68	71	56	66	61	68	81	92	98	84	68	66	64	64	97	72	74	76	78	60	82	73	97	80	82	102	44	60	63	54	88	72	79	71
ENSG00000070886	0	0	0	0	0	0	0	0	0	0	0	0	0	0	0	0	0	0	0	0	0	0	0	0	1	0	0	0	0	0	0	0	0	0	0	0	0	0	0	0	0	0	0	0	0	0	0	0
ENSG00000070915	1	1	1	1	3	1	1	3	0	0	2	0	3	0	0	1	1	2	2	3	2	3	4	1	0	1	1	3	0	0	1	2	0	3	1	1	3	1	3	3	1	1	0	1	2	0	1	0
ENSG00000070950	163	130	148	180	178	142	191	153	125	113	127	135	157	120	151	137	135	111	125	101	176	170	160	149	138	109	120	125	167	164	162	155	134	107	143	135	148	140	165	167	127	138	116	114	136	151	161	160
ENSG00000070961	213	231	253	206	244	215	238	230	141	136	162	161	193	185	164	173	155	141	162	150	205	186	223	192	152	149	148	160	191	174	202	191	189	173	188	186	213	195	202	194	156	161	163	152	208	186	200	186
ENSG00000070985	0	0	0	0	1	1	0	2	1	0	1	1	0	1	1	2	2	0	3	2	0	1	2	2	3	1	1	2	0	0	1	0	1	0	1	0	0	2	0	1	1	0	0	1	0	0	0	1
ENSG00000071051	56	64	66	67	48	37	54	65	115	115	92	103	83	80	77	77	101	86	100	98	63	72	64	89	68	74	100	83	84	68	67	67	62	85	85	84	46	60	76	59	84	80	86	98	77	81	77	73
ENSG00000071054	745	751	819	734	719	744	756	732	655	665	722	632	746	684	761	659	756	638	671	690	649	687	719	699	613	603	685	624	730	699	721	711	650	656	692	649	765	689	682	697	606	618	590	614	695	669	767	693
ENSG00000071073	84	94	100	95	114	95	102	118	73	64	81	77	91	71	71	73	79	72	63	84	149	96	115	109	66	57	79	69	85	71	91	84	79	88	99	74	97	80	94	91	73	75	76	65	80	66	73	83
ENSG00000071082	1783	1714	1779	1765	1519	1454	1616	1504	2187	2098	2330	2143	2601	2473	2636	2570	2149	2158	2101	2119	1855	1697	1900	1710	1967	1980	1990	1904	2000	1945	2026	1859	1590	1531	1600	1531	1471	1405	1501	1411	1933	1806	1883	1850	2283	2237	2248	2226
ENSG00000071127	722	731	765	730	802	782	826	734	1088	992	1033	1003	1095	1124	1104	1099	991	1006	1020	1031	1014	954	946	958	919	896	942	884	1050	990	1054	1001	845	828	912	838	922	885	918	962	848	852	851	834	1073	1052	1116	1077
ENSG00000071189	49	57	53	64	47	47	39	48	36	35	41	37	39	38	43	43	34	28	43	49	45	51	50	37	30	38	41	31	47	50	44	43	67	52	41	44	40	32	41	39	44	35	40	46	38	37	47	29
ENSG00000071203	0	0	0	0	0	0	0	0	0	0	0	0	0	0	0	0	0	0	0	0	0	0	0	0	0	0	0	0	0	0	0	0	0	0	0	0	0	0	0	0	0	0	0	0	0	0	0	0
ENSG00000071205	7	11	6	7	12	14	13	9	5	6	9	9	10	10	7	9	9	8	7	5	16	12	6	12	5	9	5	9	11	10	5	13	4	10	3	12	17	8	10	7	4	8	5	10	10	7	5	10
ENSG00000071242	11	17	12	6	4	3	9	7	8	9	12	12	8	4	3	10	20	11	13	9	5	7	13	12	8	12	6	12	6	3	6	10	8	9	13	16	3	6	6	8	11	10	12	12	7	6	4	3
ENSG00000071243	91	93	99	84	83	75	80	75	56	65	66	66	101	75	65	83	66	62	57	64	87	62	74	59	80	60	71	76	76	73	83	75	94	111	105	82	71	73	68	92	71	63	67	61	83	81	87	91
ENSG00000071246	46	41	51	40	82	70	60	72	72	53	72	69	62	67	60	68	62	79	71	67	88	72	96	98	54	64	52	59	57	52	63	56	49	49	70	51	65	72	68	94	51	50	64	48	67	56	66	61
ENSG00000071282	0	0	0	0	0	0	0	0	0	0	0	0	0	0	0	0	0	0	0	0	0	0	0	0	0	0	0	0	0	0	0	0	0	0	0	0	0	0	0	0	0	0	0	0	0	0	0	0
ENSG00000071462	246	241	263	242	224	214	178	198	249	255	289	258	274	254	250	261	354	302	340	296	228	229	248	260	253	309	281	275	275	260	282	254	260	291	280	234	220	222	224	222	255	236	247	262	278	259	292	252
ENSG00000071537	315	316	302	290	255	290	289	272	260	256	251	262	252	262	262	281	237	238	251	243	225	238	256	238	256	227	272	251	302	236	270	264	308	293	313	310	284	263	235	261	277	241	257	253	259	302	252	236
ENSG00000071539	134	114	149	123	145	120	115	105	146	136	135	132	131	141	152	113	114	116	119	126	116	129	113	116	112	111	124	119	158	154	147	131	109	130	138	122	135	108	115	108	114	123	99	97	125	120	125	145
ENSG00000071553	152	142	166	147	165	152	153	159	245	256	238	241	242	195	239	233	229	196	232	223	170	185	201	217	188	201	200	203	194	192	205	193	162	189	166	173	189	178	200	164	186	183	197	206	234	199	208	232
ENSG00000071564	1682	1499	1628	1642	1060	1006	1107	1029	3143	2948	3079	3085	2431	2245	2440	2327	2793	2626	2808	2835	1435	1415	1486	1366	2488	2465	2561	2487	2391	2285	2411	2275	2142	2098	2110	2017	1364	1293	1327	1344	2344	2268	2408	2291	2222	2199	2378	2286
ENSG00000071575	0	1	0	0	0	0	0	0	0	0	0	0	0	0	0	0	0	0	0	0	0	0	0	0	0	0	0	0	0	0	0	0	0	0	0	0	0	0	0	0	0	0	0	0	0	0	0	0
ENSG00000071626	558	538	558	513	444	424	497	439	714	679	767	693	643	585	671	626	732	686	709	690	503	490	499	490	613	565	566	602	644	603	653	594	626	611	590	608	495	459	483	467	633	520	585	532	621	631	604	630
ENSG00000071655	258	262	266	300	235	239	263	233	507	470	485	458	464	459	469	464	489	481	491	474	351	334	410	334	390	389	420	413	410	382	419	420	384	350	390	364	297	301	338	294	338	382	364	350	427	411	395	396
ENSG00000071677	0	0	0	0	0	0	0	0	0	0	0	0	0	0	0	0	0	0	0	0	0	0	0	0	0	0	0	0	0	0	0	0	0	0	0	0	0	0	0	0	0	0	0	0	0	0	0	0
ENSG00000071794	468	440	487	495	482	465	501	434	362	378	344	388	428	362	447	423	370	326	349	306	453	408	463	479	362	340	339	326	470	444	475	423	431	395	425	378	413	395	405	385	390	404	355	358	442	461	419	411
ENSG00000071859	66	73	75	78	75	87	64	68	105	88	123	107	99	124	106	117	92	97	110	107	93	79	86	103	94	93	95	103	92	91	100	105	76	71	80	85	86	81	71	77	87	88	86	88	91	109	91	119
ENSG00000071889	34	32	35	27	35	26	37	47	73	89	83	74	63	66	70	52	57	57	75	62	49	45	59	54	63	49	44	66	37	43	59	53	58	48	46	40	45	48	53	55	63	48	51	48	58	66	53	68
ENSG00000071894	545	471	538	494	478	471	478	433	1103	1029	1106	1055	837	771	909	858	1039	995	1048	1030	676	571	622	696	936	962	996	938	841	795	772	805	794	685	725	731	663	573	617	607	776	740	802	762	899	874	827	840
ENSG00000071909	1	0	0	0	0	2	0	0	1	0	0	0	2	1	1	0	0	0	1	1	2	0	0	1	0	0	0	1	1	0	0	0	0	1	0	2	1	0	1	0	0	0	0	1	1	0	1	0
ENSG00000071967	28	20	33	24	54	64	55	43	22	27	29	25	36	34	39	31	34	19	25	19	62	52	36	45	23	29	36	16	36	19	24	27	26	24	27	22	42	34	35	49	25	31	22	21	29	34	26	31
ENSG00000071991	0	1	0	0	0	0	0	0	0	0	0	0	0	0	0	0	0	0	0	0	0	0	0	0	0	0	0	0	0	0	0	0	1	0	0	0	0	0	0	0	0	0	0	0	0	0	0	0
ENSG00000071994	228	178	172	176	151	140	139	131	129	129	145	127	151	132	163	132	133	155	139	148	160	140	146	152	138	123	150	131	157	147	162	176	179	154	201	178	186	150	152	151	145	143	157	137	142	133	122	129
ENSG00000072041	0	0	0	0	0	0	0	0	0	0	0	0	0	0	0	0	0	0	0	0	0	0	0	0	0	0	0	0	0	0	0	0	0	0	0	0	0	0	0	0	0	0	0	0	0	0	0	0
ENSG00000072042	186	145	159	150	131	125	117	99	112	112	137	103	90	112	88	116	134	115	124	135	112	112	125	110	115	133	123	137	130	108	127	93	144	156	147	129	98	115	111	111	109	116	129	126	127	128	102	115
ENSG00000072062	111	96	92	107	118	105	103	100	128	103	119	127	107	109	127	111	121	131	116	134	121	108	138	123	105	126	106	136	107	99	106	130	128	118	128	112	121	125	109	119	87	98	100	85	107	127	130	114
ENSG00000072071	50	51	42	31	60	63	62	43	106	93	78	70	72	64	69	63	80	87	77	77	50	55	63	66	70	76	71	62	51	58	60	58	66	55	71	53	49	46	51	63	49	45	55	63	61	65	67	55
ENSG00000072080	0	1	0	2	1	0	3	1	2	1	0	0	3	1	0	0	0	0	0	0	0	0	0	1	0	1	0	1	0	1	0	1	0	0	1	0	4	0	0	1	0	0	0	0	3	0	0	0
ENSG00000072110	107	79	100	113	148	145	153	137	165	181	161	145	173	172	158	176	201	179	176	180	173	180	202	170	168	147	152	142	144	162	179	157	128	133	137	105	193	170	188	199	134	130	153	120	165	158	166	171
ENSG00000072121	75	91	103	83	76	88	73	85	119	91	104	97	95	68	88	97	124	89	119	72	96	67	84	83	102	100	103	85	65	90	80	96	88	96	100	88	94	118	86	89	87	79	94	108	94	82	105	74
ENSG00000072133	0	0	0	1	1	1	1	0	0	0	0	1	0	0	0	0	0	0	1	1	2	0	1	0	2	0	0	0	0	0	0	0	0	1	0	0	0	0	1	0	0	0	0	2	0	0	0	0
ENSG00000072134	0	0	0	0	0	0	1	0	0	0	0	0	0	0	0	0	0	0	0	1	1	0	0	0	0	1	0	0	0	0	0	0	0	0	2	0	0	0	0	0	0	0	1	0	1	0	3	0
ENSG00000072135	174	139	182	182	137	125	160	146	217	213	218	208	190	193	195	184	220	227	230	232	187	156	173	145	202	222	230	206	173	177	198	191	223	203	190	205	137	156	159	161	164	202	216	158	178	186	242	166
ENSG00000072163	48	44	46	42	62	63	67	50	88	95	89	62	80	69	86	92	84	91	84	91	73	79	103	102	73	81	90	77	67	70	71	86	61	63	64	62	81	73	105	68	69	64	67	62	84	74	93	74
ENSG00000072182	0	0	1	1	0	0	0	1	1	1	0	1	1	2	1	0	0	0	0	1	0	0	0	0	0	0	1	0	0	0	0	0	0	0	1	0	0	0	0	0	0	0	0	0	0	1	1	0
ENSG00000072195	3	0	0	3	6	3	7	8	7	6	3	2	4	4	2	3	9	8	7	8	11	10	13	6	4	3	8	8	5	5	9	0	7	3	4	5	10	5	9	12	7	1	6	3	4	5	3	7
ENSG00000072201	1	3	2	6	2	1	3	1	0	3	3	3	6	1	1	3	2	3	0	3	5	1	1	2	4	1	0	2	3	3	4	4	4	3	1	3	2	3	1	2	1	3	2	0	2	1	4	2
ENSG00000072210	68	62	59	46	53	54	47	40	44	48	55	44	41	41	42	45	47	47	37	53	44	73	50	47	37	40	47	52	43	48	37	48	60	51	60	42	63	52	51	54	48	52	40	41	38	55	52	58
ENSG00000072274	1390	1320	1456	1326	1251	1206	1285	1177	1097	1048	1101	1076	1311	1308	1311	1215	1036	1043	1063	1089	1265	1212	1292	1240	1109	1053	1149	1041	1355	1281	1298	1332	1283	1212	1310	1233	981	962	1006	891	1144	1029	1070	1110	1172	1155	1181	1170
ENSG00000072310	289	310	303	288	244	255	277	298	630	555	549	608	436	420	405	403	582	544	545	494	345	365	373	375	479	504	536	510	443	406	388	374	369	378	420	408	310	289	334	315	403	400	397	394	379	358	361	385
ENSG00000072315	0	0	0	1	0	0	0	0	0	0	0	0	0	0	0	0	0	0	2	0	0	1	0	0	0	1	0	0	0	0	0	0	0	0	0	0	0	0	0	0	0	0	1	0	0	1	0	0
ENSG00000072364	356	298	283	290	393	329	359	388	225	235	241	248	254	204	234	275	237	230	234	201	315	309	324	319	243	257	249	244	234	259	266	221	292	239	270	269	381	282	307	301	261	267	240	266	255	260	254	258
ENSG00000072401	44	62	50	42	38	50	31	48	29	32	23	36	30	22	37	34	33	24	28	30	29	28	32	35	33	36	28	30	44	20	47	35	58	34	49	52	51	28	35	33	33	37	34	34	28	27	33	34
ENSG00000072415	80	75	101	78	57	62	73	66	67	48	57	55	64	54	56	54	60	61	65	57	69	70	74	63	57	61	59	66	60	55	62	58	76	88	71	71	62	51	56	66	74	57	74	68	47	56	65	69
ENSG00000072422	49	33	51	36	29	41	37	26	48	33	38	20	40	31	53	37	42	41	44	29	29	50	40	48	37	44	41	39	44	47	41	22	45	44	43	37	29	25	35	25	45	32	42	36	46	37	44	42
ENSG00000072501	1643	1479	1734	1563	1356	1343	1394	1378	1580	1542	1536	1420	1467	1386	1469	1407	1677	1577	1639	1528	1324	1309	1352	1346	1450	1403	1405	1371	1583	1467	1529	1429	1436	1370	1406	1361	1382	1329	1396	1330	1328	1253	1285	1330	1489	1485	1432	1454
ENSG00000072506	77	84	83	72	71	69	62	64	113	140	113	95	120	113	117	123	124	121	119	110	98	108	104	72	113	97	109	95	115	88	112	108	83	108	82	87	94	79	76	108	91	86	92	87	131	114	119	104
ENSG00000072518	144	134	163	153	122	132	127	117	162	199	181	174	152	168	177	155	185	181	206	192	134	157	129	130	157	165	186	160	163	164	182	145	178	172	179	148	153	140	147	152	173	176	175	167	175	171	182	166
ENSG00000072571	224	209	225	234	164	156	165	147	142	138	144	116	163	155	171	144	145	109	146	125	163	146	159	158	129	113	114	114	185	195	215	176	159	162	160	152	158	161	171	156	136	123	143	125	184	157	165	185
ENSG00000072609	9	5	10	4	9	4	5	4	9	5	11	10	12	3	4	8	9	9	5	15	6	3	8	6	8	14	10	6	6	7	7	6	12	6	5	8	3	1	5	3	8	6	3	7	16	9	10	14
ENSG00000072657	86	79	71	76	81	71	93	90	60	54	37	47	59	60	71	59	38	57	45	45	86	86	92	76	50	46	52	52	77	60	52	77	67	63	63	58	65	73	87	59	57	51	47	50	57	59	61	68
ENSG00000072682	42	38	44	62	43	43	40	49	114	78	70	89	55	46	55	56	66	69	61	70	46	46	38	31	96	77	97	109	47	49	41	51	47	44	53	53	26	37	40	26	71	69	60	84	40	41	35	49
ENSG00000072694	3	4	4	2	8	1	5	6	4	2	2	2	3	3	3	3	2	2	1	6	7	10	5	4	3	1	5	3	2	1	4	4	5	3	6	3	8	5	6	9	2	2	5	4	2	3	5	3
ENSG00000072736	308	285	315	277	287	300	271	266	236	245	255	259	254	247	243	250	283	261	243	267	285	235	264	242	245	254	287	271	236	270	262	250	294	255	273	268	273	274	246	244	269	232	270	255	276	252	266	277
ENSG00000072756	121	86	85	110	81	69	72	71	72	54	73	67	68	75	75	64	65	78	62	78	64	74	92	62	65	52	73	53	68	85	68	72	86	82	82	94	74	66	76	75	83	65	79	68	82	90	59	90
ENSG00000072778	307	274	266	306	365	316	379	332	454	439	427	420	454	372	445	424	400	422	427	386	402	395	435	427	396	451	444	405	407	377	402	400	340	322	358	325	356	375	415	378	389	353	390	370	418	380	442	411
ENSG00000072786	238	227	235	236	257	222	226	234	355	368	376	337	327	287	366	330	376	364	347	375	323	295	237	274	305	341	363	337	331	309	309	307	315	311	339	323	275	273	274	274	291	269	267	292	338	286	321	302
ENSG00000072803	214	218	218	235	237	202	208	202	187	189	184	180	179	188	184	184	200	166	201	182	184	192	203	207	170	157	192	157	185	170	198	172	185	174	210	207	195	172	186	195	194	162	173	177	195	192	196	136
ENSG00000072818	194	170	172	177	205	192	203	164	396	367	370	362	303	315	305	304	313	316	373	339	260	233	262	260	386	385	338	320	282	278	266	255	255	197	219	212	205	190	195	224	276	292	272	274	281	304	297	299
ENSG00000072832	129	119	116	129	112	138	131	119	198	162	223	189	113	140	142	129	169	173	180	164	142	152	166	163	184	200	168	177	122	125	133	115	143	145	139	145	139	117	116	138	167	136	156	152	126	108	131	152
ENSG00000072840	0	0	0	0	0	0	1	0	0	0	2	0	0	0	0	0	1	0	0	0	0	2	1	0	1	1	2	2	1	0	1	1	0	0	1	2	1	0	3	0	1	2	0	0	1	1	3	0
ENSG00000072849	90	98	114	109	88	79	92	83	71	61	77	63	91	86	67	68	73	83	75	88	77	90	102	91	79	64	78	74	91	86	90	81	92	98	103	109	83	81	96	95	73	84	76	66	85	76	83	85
ENSG00000072858	20	16	22	19	29	25	33	30	15	23	28	12	21	14	15	15	20	20	21	21	15	20	41	27	31	24	25	13	12	21	17	23	21	26	24	16	24	31	25	22	13	17	16	12	19	14	17	16
ENSG00000072864	120	129	125	108	109	106	121	109	136	123	143	127	122	115	147	114	150	132	141	137	100	84	125	99	112	117	115	116	135	122	129	129	139	135	132	132	116	109	112	132	130	99	129	118	129	116	146	133
ENSG00000072952	11	4	4	7	14	23	22	16	5	5	8	6	6	5	4	5	6	4	6	7	18	11	14	14	7	8	5	7	6	7	2	10	7	8	5	1	22	13	15	10	4	6	5	6	7	3	7	2
ENSG00000072954	11	7	5	4	13	16	14	9	10	4	16	7	10	11	9	14	11	12	10	8	11	21	15	15	12	13	14	14	8	6	10	7	11	15	8	6	10	13	9	11	9	8	8	9	12	8	11	17
ENSG00000072958	150	162	194	152	150	143	163	138	252	264	281	244	257	206	219	245	233	247	270	260	187	170	169	160	272	212	234	235	238	242	250	236	221	193	219	180	193	179	184	176	222	203	220	200	257	221	231	254
ENSG00000073008	0	0	0	0	0	0	0	0	0	0	0	0	0	0	0	0	0	0	0	0	0	0	0	0	0	0	0	0	0	0	0	0	0	0	0	0	0	0	0	0	0	0	0	0	0	0	0	0
ENSG00000073050	69	71	61	63	58	65	72	71	95	104	105	125	104	98	95	77	118	131	122	113	101	100	84	97	97	84	100	74	73	78	83	102	80	93	84	77	76	82	75	73	82	80	108	73	85	106	83	98
ENSG00000073060	321	351	336	354	318	285	290	298	464	493	467	481	433	408	450	419	491	480	493	505	378	388	389	394	410	401	446	440	449	384	440	414	427	422	412	425	392	382	408	358	353	395	386	396	414	417	410	434
ENSG00000073067	0	0	0	1	1	0	0	0	0	2	0	2	0	0	0	0	0	1	1	2	1	0	0	0	0	1	0	0	0	0	1	0	1	1	1	0	0	0	0	1	0	1	0	0	0	0	0	0
ENSG00000073111	902	825	944	901	916	952	922	896	1585	1531	1635	1580	1563	1507	1530	1407	1425	1459	1502	1373	1279	1135	1180	1189	1273	1276	1385	1262	1392	1258	1365	1365	988	1037	1050	1006	1055	1067	1122	1093	1130	1175	1205	1199	1490	1385	1483	1404
ENSG00000073146	0	0	0	0	0	0	0	1	0	0	0	0	0	0	0	0	0	1	0	0	0	0	0	0	0	0	0	0	0	0	0	0	0	0	0	0	0	0	0	0	0	0	0	0	0	0	0	0
ENSG00000073150	2	0	2	5	3	1	2	1	5	5	1	2	0	4	2	4	3	5	4	4	4	2	3	5	5	0	4	4	6	0	1	4	1	1	1	0	6	1	3	3	4	5	5	3	0	2	2	1
ENSG00000073169	76	78	81	66	66	75	74	58	158	143	178	149	120	133	142	128	147	140	151	153	107	97	121	90	159	147	145	143	149	111	150	128	123	106	112	110	89	86	90	76	124	122	119	119	131	122	124	118
ENSG00000073282	1	0	5	5	9	7	7	5	0	1	0	1	0	0	2	1	0	0	0	2	2	1	2	1	0	0	0	2	1	0	2	0	0	2	0	0	8	3	5	2	0	0	0	0	1	2	0	2
ENSG00000073331	75	66	83	71	76	78	86	78	61	70	74	81	80	67	70	72	71	77	91	74	62	67	77	81	81	70	91	89	60	61	76	76	65	62	81	66	78	62	66	47	61	77	62	78	75	59	69	66
ENSG00000073350	44	41	60	49	51	57	51	54	93	94	102	75	68	60	90	71	103	90	90	83	69	66	63	76	81	76	67	78	80	65	89	83	60	55	80	71	62	54	52	66	74	81	75	80	66	75	61	65
ENSG00000073417	89	80	101	94	96	84	110	103	99	89	78	92	82	80	70	94	90	81	84	97	92	96	101	101	81	90	97	87	104	91	101	104	93	84	89	90	99	92	115	94	87	98	92	77	89	100	109	92
ENSG00000073464	0	0	0	0	0	0	0	1	0	0	0	0	0	0	0	0	0	0	0	0	0	0	0	0	1	1	0	0	0	0	0	0	0	0	0	0	1	0	0	0	0	0	0	0	0	0	0	0
ENSG00000073536	146	121	157	148	117	107	107	92	208	196	194	205	171	172	169	199	224	191	203	200	159	147	137	139	160	150	167	161	158	156	164	169	139	130	141	164	125	111	113	120	165	154	131	138	157	180	171	173
ENSG00000073578	336	351	353	312	240	227	230	249	514	479	521	509	433	428	428	433	479	479	468	488	311	282	278	290	452	448	446	444	401	395	421	409	368	361	361	338	262	274	279	269	354	365	384	349	409	433	397	434
ENSG00000073584	337	292	326	288	294	260	285	256	217	197	207	202	205	237	222	247	224	182	214	200	262	233	257	243	200	190	203	195	237	265	278	269	264	222	282	241	291	258	268	267	236	220	240	226	273	245	272	248
ENSG00000073598	0	2	0	3	1	1	3	0	1	0	0	0	2	1	3	1	1	2	4	2	0	0	2	3	1	1	0	0	2	0	0	1	2	1	2	0	0	0	3	1	0	2	0	0	0	1	0	0
ENSG00000073605	92	79	97	94	87	88	84	89	97	78	106	75	94	68	54	80	105	90	107	100	84	80	97	73	112	111	108	119	70	60	77	86	84	75	81	80	56	61	65	52	66	92	74	88	85	66	75	81
ENSG00000073614	561	508	519	501	498	492	537	483	428	420	459	455	472	443	423	457	488	479	512	451	475	439	471	436	501	428	434	402	456	430	442	439	505	469	466	490	457	454	441	434	437	441	448	437	457	473	484	466
ENSG00000073670	3	0	2	0	8	2	7	6	5	8	7	4	9	5	3	10	14	10	10	9	2	7	3	7	11	7	8	10	2	7	7	12	6	11	7	5	9	3	5	6	9	10	8	2	5	8	11	9
ENSG00000073711	3	5	3	3	3	2	2	6	0	1	3	1	2	1	0	3	1	1	3	1	1	1	3	3	1	1	4	1	2	4	2	2	3	5	0	1	2	2	4	3	0	1	3	0	0	1	2	1
ENSG00000073712	8	8	2	4	2	8	12	14	2	5	3	1	2	1	2	6	5	4	5	3	17	10	11	5	2	10	1	5	5	7	5	4	9	4	4	4	11	10	13	11	1	6	2	4	6	8	2	4
ENSG00000073734	0	0	0	0	0	0	0	0	0	0	0	0	0	0	0	0	0	0	0	0	0	0	0	0	0	0	0	0	0	0	0	0	0	0	0	0	0	0	0	1	0	0	0	0	0	0	0	0
ENSG00000073737	0	0	0	0	0	0	0	0	0	0	0	0	0	0	0	0	0	0	0	0	0	0	0	0	0	0	0	0	0	0	0	0	0	0	0	0	0	0	0	0	0	0	0	0	0	0	0	0
ENSG00000073754	0	0	0	0	0	0	0	0	0	0	0	0	0	0	0	0	0	0	0	0	0	0	0	0	0	0	0	0	0	0	0	0	0	0	0	0	0	0	0	0	0	0	0	0	0	0	0	0
ENSG00000073756	0	1	0	1	2	0	2	2	0	1	1	1	0	0	0	1	1	0	0	1	0	0	0	1	1	2	2	0	3	0	0	0	0	0	1	1	1	1	2	1	1	0	2	1	1	1	0	0
ENSG00000073792	354	326	343	322	196	195	211	189	336	338	330	311	296	254	288	239	362	344	402	356	180	205	195	180	325	339	292	308	327	294	286	293	304	303	333	334	197	179	193	192	317	259	285	310	304	264	305	289
ENSG00000073803	11	9	9	12	13	10	11	11	9	7	9	13	5	11	12	11	14	14	15	12	11	11	13	12	13	14	18	21	15	8	5	8	13	11	12	15	10	5	9	9	13	10	18	17	10	9	11	11
ENSG00000073849	514	444	453	489	923	826	911	898	484	439	492	440	653	652	720	651	546	524	511	505	1057	995	1111	986	528	522	559	545	724	672	702	697	583	538	578	573	984	933	988	916	515	474	505	485	710	675	696	707
ENSG00000073861	2	2	3	1	7	6	3	7	3	1	1	3	1	2	1	3	4	1	2	4	13	3	7	10	2	0	4	2	1	1	0	0	3	2	1	1	5	6	7	8	2	3	1	1	3	3	3	3
ENSG00000073905	0	0	1	0	0	0	0	0	0	0	0	0	0	0	0	1	0	0	0	0	0	0	0	0	0	0	0	1	0	0	0	0	0	0	1	0	0	0	0	1	0	0	0	0	1	0	0	0
ENSG00000073910	59	60	60	57	84	78	94	58	66	55	56	52	67	47	72	63	63	51	56	54	81	66	63	85	43	45	46	47	61	55	52	51	60	54	61	64	107	78	74	92	45	66	74	54	68	62	56	68
ENSG00000073921	266	218	254	264	209	239	213	223	213	183	197	224	234	233	210	201	180	198	204	189	227	215	225	202	229	204	230	188	202	210	218	204	235	202	251	250	226	201	213	204	223	209	233	202	224	178	227	206
ENSG00000073969	97	116	98	100	104	118	132	105	86	79	86	90	93	97	102	77	100	100	95	79	114	124	113	111	86	89	75	91	86	80	115	91	110	85	85	82	117	113	130	84	82	82	89	86	101	75	112	97
ENSG00000074047	0	0	0	0	0	0	0	1	0	1	0	0	0	0	0	0	0	0	0	0	1	0	0	0	0	0	0	0	0	0	0	0	0	0	0	0	0	0	0	0	0	0	0	0	0	0	0	0
ENSG00000074054	340	391	397	366	370	336	360	323	395	414	415	393	334	341	363	331	380	358	414	372	347	341	392	317	370	329	382	402	338	329	341	360	351	384	361	356	340	332	369	315	374	368	379	339	336	359	337	364
ENSG00000074071	154	144	158	165	102	107	120	153	255	208	241	237	234	250	249	247	225	218	241	246	180	180	203	181	210	159	164	176	244	240	272	236	189	206	192	180	180	185	203	182	193	216	198	213	241	226	228	216
ENSG00000074181	0	0	0	0	1	3	0	1	1	3	3	0	2	4	1	1	4	1	3	2	2	5	2	2	2	0	2	0	1	2	1	1	0	1	1	0	1	2	0	1	0	1	0	0	1	1	0	1
ENSG00000074201	314	339	351	354	267	240	270	252	280	242	300	272	266	291	258	282	248	247	275	274	269	271	280	212	297	283	277	254	275	270	297	270	298	286	318	279	216	244	237	234	286	296	277	239	314	271	285	248
ENSG00000074211	0	1	0	0	0	0	0	0	0	0	0	0	0	0	0	0	0	0	0	0	0	0	0	0	0	0	0	0	0	0	0	0	0	0	0	1	0	0	0	0	0	0	0	0	0	0	0	0
ENSG00000074219	1	1	2	0	1	0	0	0	1	2	1	1	0	0	0	1	0	1	0	3	1	3	1	1	1	4	2	1	0	1	0	1	1	1	2	1	0	1	1	0	1	0	0	1	1	1	0	0
ENSG00000074266	116	115	131	136	147	89	110	117	104	105	111	89	109	79	95	106	122	103	93	77	109	106	116	93	93	98	98	89	124	91	92	109	125	109	149	116	92	83	91	87	98	109	98	77	95	89	108	109
ENSG00000074276	6	7	5	3	6	9	3	6	6	10	6	9	5	5	6	2	7	5	9	7	1	4	6	8	5	4	5	6	4	5	6	6	11	7	6	7	9	3	4	6	4	7	6	3	4	3	8	11
ENSG00000074317	2	1	4	2	9	6	5	7	8	8	10	5	4	4	7	2	4	6	4	10	6	4	11	11	8	7	8	7	3	3	10	0	2	0	4	2	9	7	8	7	6	5	4	6	3	3	5	1
ENSG00000074319	92	110	86	90	111	68	74	64	75	83	92	78	102	99	101	102	88	71	85	99	97	103	80	71	88	69	65	102	79	77	89	97	93	79	96	79	86	81	92	91	94	67	90	91	96	111	84	98
ENSG00000074356	199	203	231	204	204	182	193	192	174	169	156	145	173	148	172	165	188	186	181	174	163	181	164	181	173	159	163	166	181	161	171	159	166	180	186	161	157	153	177	157	166	168	160	163	165	150	167	172
ENSG00000074370	101	105	81	104	98	119	91	84	185	204	205	173	163	143	155	137	180	175	186	188	157	140	139	146	148	143	150	127	149	139	133	125	138	142	144	156	164	157	151	147	145	127	167	146	158	128	132	159
ENSG00000074410	0	0	0	0	0	0	0	0	0	0	0	0	0	0	0	0	0	0	0	0	0	0	0	1	0	0	0	0	0	0	0	0	0	0	0	0	1	0	0	0	0	0	0	0	0	0	0	0
ENSG00000074416	1	6	1	3	6	4	3	8	3	5	7	6	4	3	4	8	7	7	6	6	4	6	2	5	4	7	9	13	4	1	4	2	4	3	4	5	5	4	2	6	4	8	4	2	3	1	2	5
ENSG00000074527	0	0	0	0	0	0	0	0	0	0	0	0	0	0	0	0	0	0	0	0	0	0	0	0	0	0	0	0	0	0	0	0	0	0	0	0	0	0	0	0	0	0	0	0	0	0	0	0
ENSG00000074582	112	109	110	96	97	77	79	80	130	119	127	120	147	124	128	139	159	136	139	146	125	104	103	105	129	133	147	109	120	110	113	105	113	97	121	119	84	83	100	77	120	111	127	129	122	120	123	129
ENSG00000074590	0	0	0	0	0	0	0	0	0	0	0	0	0	0	0	0	0	0	0	0	0	0	0	0	0	0	0	0	0	0	0	0	0	0	0	0	0	0	0	0	0	0	0	0	0	0	0	0
ENSG00000074603	248	240	299	267	220	177	177	168	185	163	161	169	201	172	188	159	170	160	145	187	185	194	181	171	160	170	189	164	218	198	210	195	223	209	219	191	201	200	177	167	195	190	166	183	168	180	167	187
ENSG00000074621	45	46	50	48	71	79	67	63	62	59	70	62	60	59	57	62	57	64	61	63	53	56	48	43	54	72	60	56	57	44	56	53	42	52	41	44	50	56	49	57	66	61	52	47	64	49	54	55
ENSG00000074657	1	1	2	0	1	0	0	0	0	0	2	0	0	0	0	0	0	1	1	1	0	0	0	1	1	0	0	1	1	0	0	1	2	0	1	0	0	0	1	0	1	1	0	0	2	1	0	1
ENSG00000074660	40	46	34	37	69	38	74	69	59	50	79	61	49	71	71	59	57	58	53	62	83	79	95	88	53	42	67	55	52	64	54	63	51	48	46	55	87	81	99	80	38	47	48	46	52	51	57	45
ENSG00000074695	556	512	520	547	573	477	542	524	439	405	425	410	397	418	463	402	416	419	429	389	526	486	501	541	442	432	433	427	486	479	463	442	462	472	488	487	487	492	524	474	454	430	428	458	441	439	446	418
ENSG00000074696	345	324	362	336	368	348	342	326	240	245	245	226	263	240	252	260	275	247	256	251	332	348	354	339	242	230	236	254	255	284	283	250	319	282	313	302	318	300	315	315	226	257	234	219	304	307	300	290
ENSG00000074706	1	0	2	0	4	2	2	2	0	0	0	1	3	1	2	1	1	1	0	0	2	2	4	4	1	0	0	0	1	1	0	1	0	1	1	1	1	4	3	5	1	1	0	1	1	2	2	0
ENSG00000074755	259	305	286	263	231	209	254	251	313	301	325	300	285	279	313	275	357	330	336	325	251	217	235	244	298	290	314	305	309	281	300	294	303	263	303	295	251	258	266	247	249	270	255	280	301	296	262	297
ENSG00000074771	1	0	0	2	4	2	3	3	0	0	0	0	2	1	0	0	1	0	1	0	3	0	1	1	2	3	0	1	1	1	0	0	0	0	0	0	1	3	1	2	0	0	1	0	1	0	1	0
ENSG00000074800	3984	3612	3916	3754	3833	3611	3825	3696	7523	7291	7549	7232	6626	6414	6749	6598	6752	6358	6863	6504	4786	4549	4966	4537	6917	6673	6939	6616	5823	5548	5804	5537	4351	4283	4447	4273	3568	3345	3537	3380	5833	5622	5907	5656	6101	6067	6272	5864
ENSG00000074803	1	1	0	0	4	2	3	2	2	0	2	2	0	0	1	3	0	2	2	2	0	0	2	4	0	0	1	1	1	0	2	0	1	0	1	0	0	0	1	4	2	2	0	1	1	0	3	2
ENSG00000074842	76	66	90	73	63	60	63	78	128	103	116	143	103	123	132	99	120	111	144	121	95	86	98	79	94	88	108	103	122	102	121	109	98	83	89	88	91	92	95	85	99	101	107	95	112	93	94	106
ENSG00000074855	63	47	48	65	67	51	49	45	98	91	72	96	83	57	65	54	90	96	92	81	66	51	74	67	81	87	97	74	73	61	84	55	53	55	55	58	49	56	43	58	75	53	63	92	59	70	60	55
ENSG00000074935	78	66	77	68	33	36	40	25	58	41	56	53	37	26	24	33	53	39	61	49	42	36	34	38	57	51	60	57	43	53	27	42	56	57	60	72	22	39	29	29	47	60	55	53	42	37	42	45
ENSG00000074964	0	0	2	0	0	1	1	0	0	0	1	1	1	1	0	1	0	1	1	0	0	1	0	0	1	1	2	2	0	0	0	0	0	0	0	1	0	0	0	0	0	1	0	0	0	0	0	2
ENSG00000074966	7	3	7	5	6	6	14	9	4	6	2	2	5	4	5	4	7	9	5	3	5	13	5	7	5	4	8	8	9	4	6	4	9	1	7	3	10	10	3	11	4	5	4	5	8	2	3	7
ENSG00000075035	0	0	0	0	0	0	0	0	0	0	0	0	0	0	0	0	0	0	0	0	0	0	0	0	0	0	0	0	0	0	0	0	0	0	0	0	0	0	0	0	0	0	0	0	0	0	0	0
ENSG00000075043	0	0	0	0	1	0	0	0	0	0	0	0	0	0	0	0	0	0	0	0	0	0	0	1	0	0	1	0	0	0	0	0	1	0	1	0	0	0	1	0	0	0	0	0	1	0	0	0
ENSG00000075073	3	0	1	0	1	0	0	0	0	0	0	0	0	0	2	0	1	0	1	0	0	1	1	1	4	0	0	0	0	1	0	0	0	1	0	0	1	0	0	0	0	0	0	2	1	0	0	0
ENSG00000075089	98	99	134	94	86	97	82	76	63	53	76	82	69	62	71	76	59	72	66	79	84	77	93	80	60	67	50	73	87	71	75	70	101	87	86	75	58	87	81	68	69	61	80	80	81	82	80	93
ENSG00000075131	95	64	99	74	62	65	58	54	57	60	60	53	59	52	63	60	63	57	59	60	53	61	78	57	54	65	45	61	70	58	65	58	69	77	85	65	56	68	70	52	59	75	56	69	69	64	59	83
ENSG00000075142	308	247	314	274	191	166	210	178	265	273	253	241	247	234	263	218	255	226	246	250	160	175	195	184	260	282	282	235	221	244	212	263	274	287	274	268	168	138	171	180	223	228	249	244	236	229	271	270
ENSG00000075151	286	238	269	248	236	286	275	241	200	201	199	212	198	214	178	182	243	203	245	236	234	230	219	229	221	224	231	205	244	229	212	233	245	241	212	252	240	240	258	235	216	192	183	168	225	190	205	223
ENSG00000075188	109	102	101	86	67	72	68	83	75	64	65	51	83	70	74	67	67	61	62	70	79	58	71	69	51	69	67	49	74	66	83	84	80	69	88	73	57	65	79	50	67	48	59	49	72	69	91	89
ENSG00000075213	38	36	50	45	40	43	47	29	39	49	31	39	42	43	37	42	21	26	35	41	37	36	35	34	34	25	32	28	25	21	24	22	25	25	21	30	27	31	21	30	28	27	24	19	27	28	24	22
ENSG00000075218	176	164	180	163	155	159	169	148	187	163	193	191	192	183	203	173	220	216	227	221	196	154	197	142	182	180	175	175	238	232	201	214	203	207	192	179	201	203	215	187	167	165	158	170	217	224	202	207
ENSG00000075223	0	0	0	0	0	0	0	0	0	0	0	0	0	0	0	0	0	0	0	1	0	0	0	0	0	0	0	0	0	0	0	0	0	0	0	0	0	0	1	0	0	0	0	0	0	0	0	0
ENSG00000075234	26	28	23	27	27	28	25	24	31	33	33	33	34	41	29	32	42	30	35	25	33	31	38	37	37	35	30	28	34	33	19	31	20	18	26	31	32	36	37	25	32	35	16	24	33	32	26	20
ENSG00000075239	237	210	280	254	239	197	223	219	209	186	195	174	207	252	221	227	218	210	193	204	229	219	237	215	207	166	187	195	223	225	225	221	231	235	220	232	235	190	235	192	199	192	195	203	182	232	220	243
ENSG00000075240	397	396	406	429	376	356	383	366	646	572	612	626	583	564	537	563	652	625	687	630	467	454	510	456	522	537	575	554	504	513	529	529	546	465	535	458	471	456	435	443	512	496	561	482	624	541	565	564
ENSG00000075275	7	3	5	4	16	7	5	4	5	8	6	4	4	8	4	2	3	4	6	4	2	11	9	8	4	3	5	4	5	4	7	9	3	5	1	2	8	9	5	3	6	5	2	10	5	3	4	2
ENSG00000075290	2	1	0	2	2	3	0	1	3	1	1	0	1	3	2	2	4	4	4	3	1	0	2	0	3	2	2	1	0	5	2	7	4	3	4	1	3	2	5	3	1	3	2	0	3	2	4	3
ENSG00000075292	431	416	476	406	455	466	461	441	390	338	395	366	389	400	380	340	370	370	367	340	452	416	454	461	428	365	358	396	452	417	440	422	381	391	370	352	453	425	436	403	346	323	335	343	460	421	459	409
ENSG00000075303	411	361	347	369	368	356	399	357	265	271	263	264	300	250	300	284	222	223	243	237	383	336	360	361	245	277	238	260	325	306	269	285	295	288	283	271	349	282	315	307	310	287	293	291	301	267	271	275
ENSG00000075336	123	111	119	114	116	97	105	88	84	82	107	78	90	88	81	66	78	81	94	78	86	90	80	90	77	102	125	91	85	92	78	88	105	95	100	115	79	98	99	80	89	80	85	87	96	98	75	78
ENSG00000075340	2	2	1	1	0	1	0	0	0	0	1	0	0	0	0	2	0	1	0	1	0	0	0	1	1	0	1	1	0	2	0	1	1	0	0	0	0	0	0	2	0	0	0	0	1	0	1	0
ENSG00000075388	0	0	0	0	0	0	0	0	0	0	0	0	0	0	0	0	0	0	0	0	0	0	0	0	0	0	0	0	0	0	0	0	0	0	0	0	0	0	0	0	0	0	0	0	0	0	0	0
ENSG00000075391	1	1	0	1	0	1	0	3	1	0	1	0	0	1	0	0	1	2	0	3	0	1	0	2	0	0	2	0	0	0	0	0	0	1	5	1	0	1	2	2	1	0	0	1	0	0	0	2
ENSG00000075399	25	20	20	30	23	21	16	19	35	24	32	13	24	26	21	20	26	30	31	27	25	29	29	21	25	31	39	39	21	24	33	21	41	31	37	28	30	14	23	26	32	24	34	34	37	31	21	20
ENSG00000075407	227	214	229	224	176	159	164	154	159	172	164	197	135	146	148	131	220	208	193	191	153	143	156	167	216	188	186	198	165	154	178	169	196	195	196	174	154	129	154	150	162	154	142	167	161	177	179	169
ENSG00000075413	196	188	210	201	177	149	168	148	199	182	194	170	176	155	176	169	187	209	207	193	168	152	184	175	204	196	221	210	182	198	202	215	202	208	220	204	173	159	209	163	186	177	196	180	201	206	198	189
ENSG00000075415	1346	1243	1348	1262	917	879	977	905	1134	1106	1148	1063	1037	983	1085	1036	1156	1121	1158	1116	977	880	935	935	1032	960	1035	1042	1117	1034	1116	1119	1215	1152	1190	1121	913	909	976	921	1046	1018	1044	1039	1056	1044	1002	1039
ENSG00000075420	45	45	62	53	79	88	84	73	52	35	54	43	60	68	53	45	54	43	44	48	55	69	85	74	48	43	30	31	46	36	40	38	40	48	42	47	74	79	73	73	34	38	37	32	48	50	53	42
ENSG00000075426	81	72	104	83	161	167	162	148	118	91	119	96	122	110	135	114	106	102	108	89	166	140	171	151	96	82	90	89	112	109	138	88	99	86	90	91	154	168	155	131	73	68	81	81	116	110	113	108
ENSG00000075429	0	0	0	0	0	0	0	0	0	0	0	0	0	0	0	0	0	0	0	0	0	0	0	0	0	0	0	0	0	0	0	0	0	0	0	0	0	0	0	0	0	0	0	0	0	0	0	0
ENSG00000075461	0	0	1	0	0	0	0	0	0	0	0	0	0	0	0	0	0	0	0	0	0	0	0	0	0	0	0	0	0	0	0	0	1	0	1	0	0	0	0	0	0	0	0	0	0	0	0	0
ENSG00000075539	352	307	322	295	355	370	343	348	263	249	276	240	302	307	296	243	286	278	232	273	313	316	321	300	234	261	233	256	278	289	269	273	294	264	234	259	290	286	284	281	251	237	271	229	301	272	290	283
ENSG00000075568	280	249	267	263	279	251	282	271	262	254	283	221	230	202	213	196	250	260	258	236	247	249	209	231	236	265	250	256	239	258	251	263	303	261	271	274	270	279	235	249	296	266	250	250	225	252	210	238
ENSG00000075618	113	108	117	117	131	164	169	161	221	265	270	240	212	203	229	234	191	182	219	191	194	194	223	237	152	164	168	173	216	192	208	196	149	146	139	152	171	176	184	168	187	180	143	150	189	181	209	187
ENSG00000075624	5670	5449	5773	5524	4569	4474	4698	4365	8412	8055	8442	8144	7928	7512	7938	7575	7879	7503	8026	7640	5733	5366	5783	5483	7272	6987	7341	6884	7638	7401	7664	7505	6471	6382	6707	6551	5714	5493	5909	5621	6388	6360	6547	6358	7697	7663	8095	7750
ENSG00000075643	0	0	0	1	1	1	0	0	1	2	0	0	0	0	0	0	0	2	0	1	0	0	1	0	0	1	1	1	1	1	1	0	1	0	0	0	0	0	1	1	1	0	0	1	0	0	0	0
ENSG00000075651	190	152	194	169	247	188	235	224	175	129	141	130	162	159	152	152	137	146	159	127	236	203	217	224	141	139	142	147	184	178	193	195	126	157	143	147	201	211	202	203	140	118	164	135	173	176	172	171
ENSG00000075673	0	0	0	0	0	0	0	0	0	0	0	0	0	0	0	1	0	0	0	0	0	0	0	0	0	0	0	0	0	0	1	0	0	0	0	0	0	0	0	0	0	0	0	0	0	0	0	0
ENSG00000075702	111	105	125	111	86	83	96	95	145	118	141	138	123	147	123	134	172	127	160	141	114	109	96	103	139	114	137	111	133	135	129	141	98	126	119	109	119	116	105	95	100	99	115	90	128	125	134	133
ENSG00000075711	312	279	294	287	258	239	271	212	221	236	213	181	214	211	223	175	218	192	235	193	249	237	230	245	272	224	172	191	259	230	251	238	259	259	210	248	260	226	241	230	222	206	229	228	238	249	229	201
ENSG00000075785	362	375	373	353	312	270	254	288	335	397	383	371	301	328	302	328	383	328	335	345	321	290	307	285	326	291	352	318	330	356	309	379	317	320	321	330	259	292	334	265	321	279	299	312	338	343	303	325
ENSG00000075790	114	110	103	88	117	103	135	94	51	63	62	56	86	63	55	69	58	69	64	61	100	95	108	97	54	77	63	57	70	94	108	87	101	98	100	96	113	109	105	132	83	75	82	73	71	73	71	62
ENSG00000075826	103	110	101	115	89	106	103	105	150	154	160	155	114	111	133	114	159	120	159	135	121	100	119	127	170	173	141	183	130	118	135	113	101	121	99	98	81	87	95	75	158	122	101	113	127	117	119	140
ENSG00000075856	300	245	253	256	174	186	216	208	315	278	314	312	254	300	290	262	283	280	279	319	217	197	242	191	254	265	275	241	273	273	251	276	271	239	246	260	194	216	192	167	269	251	240	246	256	253	266	288
ENSG00000075884	89	96	95	91	75	87	88	75	87	88	62	78	76	77	85	78	77	70	74	88	83	75	81	89	81	74	89	90	94	83	89	74	100	96	107	80	82	81	76	57	81	71	76	96	81	85	79	77
ENSG00000075886	8	6	8	6	5	4	6	7	20	12	12	13	8	11	8	9	15	12	12	11	11	9	2	6	4	8	14	11	5	6	7	7	7	11	8	10	6	8	7	3	8	9	11	11	9	8	14	14
ENSG00000075891	0	0	0	0	0	0	0	0	0	0	0	0	0	0	0	0	0	0	0	0	0	0	0	0	0	0	0	0	0	0	0	0	0	0	0	0	0	0	0	0	0	0	0	0	0	0	0	0
ENSG00000075914	95	69	71	90	75	57	62	67	102	107	93	90	88	99	105	90	93	84	108	110	71	58	69	65	83	75	92	91	83	90	90	89	78	79	100	63	56	60	65	51	80	83	68	82	102	74	85	94
ENSG00000075945	29	29	31	20	23	17	25	22	28	16	18	21	25	11	22	15	13	21	21	10	23	18	15	7	12	13	16	23	23	16	21	18	31	28	19	18	19	18	17	16	17	17	21	22	20	11	19	15
ENSG00000075975	109	120	126	102	103	97	83	79	104	119	112	129	112	99	99	111	128	112	108	114	103	90	95	103	119	105	119	114	117	104	98	96	108	116	139	121	106	109	101	111	105	87	122	122	125	134	131	108
ENSG00000076003	867	831	906	814	783	723	761	722	723	702	729	745	738	754	732	702	773	697	731	730	751	692	711	695	646	697	710	688	801	766	777	699	769	743	792	772	702	683	731	679	725	729	705	703	739	810	731	792
ENSG00000076043	52	73	55	63	34	45	54	35	78	49	48	28	34	53	39	58	40	44	54	59	34	43	46	43	56	49	46	58	46	42	49	38	67	58	64	60	46	42	32	27	57	49	51	62	59	53	47	40
ENSG00000076053	69	55	57	60	42	35	57	55	51	39	35	39	57	38	47	52	36	41	46	44	47	44	46	45	28	32	42	39	39	39	43	42	47	39	54	39	43	32	54	44	51	54	33	45	39	33	39	39
ENSG00000076067	40	39	57	66	38	50	39	55	43	49	43	53	51	26	42	38	44	59	52	46	43	35	42	43	74	55	63	62	43	51	56	48	41	49	50	59	53	43	38	35	56	43	63	51	40	38	44	45
ENSG00000076108	437	409	440	385	356	356	351	360	569	514	556	553	404	351	444	385	522	551	608	534	438	368	380	364	553	518	559	520	415	403	420	406	439	416	461	424	384	333	364	342	459	475	481	452	430	422	423	433
ENSG00000076201	145	123	129	127	106	112	113	116	228	224	197	222	211	157	166	175	198	214	234	226	133	144	147	129	196	199	208	203	162	162	203	156	171	152	156	181	153	149	155	151	174	161	167	150	176	175	211	199
ENSG00000076242	150	146	150	141	156	127	129	141	122	117	116	120	144	133	155	123	142	122	134	110	116	128	139	156	111	126	113	117	142	137	148	131	117	119	129	119	113	139	134	119	121	102	107	103	137	119	139	134
ENSG00000076248	252	259	221	239	197	175	211	223	217	233	230	217	249	231	237	244	195	222	250	209	216	169	229	199	199	186	195	214	224	243	253	222	248	253	249	240	226	220	224	204	220	201	221	175	252	214	244	211
ENSG00000076258	7	7	13	9	17	11	19	22	6	11	10	6	4	9	8	15	8	6	6	7	11	23	14	19	6	5	6	8	13	12	6	8	6	3	13	5	4	12	11	5	5	7	4	7	10	14	10	13
ENSG00000076321	57	68	52	50	72	66	42	47	55	42	45	51	53	53	61	48	57	52	43	63	51	45	47	44	47	42	45	51	44	48	48	41	50	41	47	57	43	33	47	43	60	46	47	47	44	54	55	50
ENSG00000076344	0	1	1	0	0	0	0	0	1	1	0	0	0	2	1	0	0	2	0	2	1	0	0	0	1	0	0	1	0	0	0	0	0	0	0	2	3	0	0	0	1	2	0	0	0	1	1	1
ENSG00000076351	10	9	8	14	26	15	12	18	14	11	14	12	13	12	16	10	14	11	13	17	22	12	13	14	17	14	8	24	12	16	14	12	8	13	12	11	14	9	13	10	14	18	18	20	14	18	13	17
ENSG00000076356	0	0	0	0	0	0	0	0	0	0	1	0	0	0	0	0	0	0	0	0	0	0	0	0	1	0	0	0	0	0	0	0	0	0	0	0	0	0	0	1	0	0	0	0	1	0	0	0
ENSG00000076382	335	377	386	383	385	383	387	354	373	342	407	329	437	392	430	394	389	384	399	370	398	336	347	383	379	376	362	380	378	389	388	374	302	313	316	301	346	330	368	336	312	320	312	336	437	390	425	402
ENSG00000076513	313	268	272	259	342	299	323	324	265	269	246	228	277	252	270	279	227	241	249	265	304	308	334	317	270	257	245	244	310	319	296	273	243	265	260	263	304	313	333	299	240	244	286	238	302	264	297	265
ENSG00000076554	123	122	123	94	84	85	90	90	83	77	91	87	65	81	58	57	67	77	68	91	89	88	104	92	96	83	82	82	83	75	82	85	114	116	130	107	85	90	71	78	107	98	107	96	80	66	77	58
ENSG00000076555	43	37	37	38	63	55	56	61	78	76	77	61	35	54	43	50	62	71	56	68	75	50	48	53	74	66	63	76	52	39	52	48	54	39	45	52	49	48	58	49	60	56	64	54	56	46	45	43
ENSG00000076604	164	164	142	157	162	148	176	137	256	260	245	263	235	243	280	219	238	232	273	295	194	183	193	188	214	229	251	243	204	250	226	212	222	203	207	186	191	199	197	191	199	183	203	202	246	273	253	254
ENSG00000076641	278	275	277	273	269	242	244	225	228	226	225	210	174	172	165	191	197	218	209	228	230	236	227	205	226	197	213	216	205	196	195	172	234	268	248	251	213	179	206	181	204	219	225	225	180	191	182	183
ENSG00000076650	57	72	63	68	56	58	54	66	51	57	40	78	60	75	56	65	67	64	58	61	56	62	48	71	64	65	55	49	58	62	58	51	63	57	73	62	66	66	60	49	69	56	60	63	63	57	64	60
ENSG00000076662	7	9	6	8	24	8	16	19	19	13	18	14	17	23	21	23	17	14	11	19	24	14	20	29	20	11	14	12	28	20	29	15	14	11	12	7	18	13	18	25	12	19	14	15	18	17	22	21
ENSG00000076685	241	223	256	238	225	210	214	208	162	150	210	171	197	162	166	172	197	190	173	221	182	205	206	181	216	200	203	192	201	169	224	174	190	195	195	190	183	172	185	159	190	216	174	181	180	189	201	202
ENSG00000076706	43	46	44	57	53	38	65	43	45	59	65	50	46	54	47	37	55	70	74	49	60	58	58	63	52	43	44	47	35	43	34	49	45	39	61	41	59	65	59	61	45	41	31	35	46	41	54	52
ENSG00000076716	0	0	0	0	0	0	0	0	0	0	0	0	0	0	0	0	0	0	0	0	0	0	0	0	0	0	0	0	0	0	0	0	0	0	0	0	0	0	0	0	0	0	0	0	0	0	0	0
ENSG00000076770	441	415	421	418	485	466	507	443	364	337	358	384	389	328	367	361	297	360	357	339	416	463	478	459	400	344	414	338	462	393	438	408	407	361	372	388	410	426	436	436	309	316	364	340	377	378	393	390
ENSG00000076826	0	0	2	0	2	1	0	1	0	0	0	1	2	1	2	1	0	0	0	1	0	1	0	0	0	1	1	0	0	0	0	0	0	0	0	1	0	0	0	0	0	0	1	0	1	0	0	0
ENSG00000076864	1	0	0	0	0	1	0	0	0	0	2	0	1	0	0	0	1	1	0	0	1	2	0	0	0	0	0	0	0	2	0	0	2	1	0	1	1	1	1	0	1	0	1	0	1	0	0	0
ENSG00000076924	126	80	114	111	106	75	93	101	238	256	234	226	207	188	263	218	242	218	257	201	144	137	153	129	188	183	203	185	168	161	179	155	147	140	152	157	125	121	134	119	191	147	151	159	226	188	209	207
ENSG00000076928	338	318	326	275	244	227	223	245	559	550	596	574	489	473	451	448	553	559	551	552	333	343	367	351	585	508	554	526	468	467	497	480	439	428	398	403	315	331	307	294	411	457	441	448	481	473	492	464
ENSG00000076944	54	58	55	57	57	57	45	61	100	97	94	86	95	86	90	93	108	95	124	104	71	72	81	67	102	102	108	121	74	84	93	81	54	80	78	68	59	57	71	64	85	57	77	72	95	102	90	84
ENSG00000076984	100	110	112	103	87	81	79	81	173	159	189	181	136	144	141	147	154	154	153	171	98	119	105	114	151	146	147	145	153	137	135	120	125	136	129	156	118	104	116	111	138	123	138	136	137	136	130	143
ENSG00000077009	0	0	0	0	0	0	0	0	0	0	0	0	0	0	0	0	0	0	0	0	0	0	0	0	0	0	0	0	0	0	0	0	0	0	0	0	0	0	0	0	0	0	0	0	0	0	0	0
ENSG00000077044	980	937	950	943	947	898	918	873	1572	1526	1573	1533	1215	1253	1210	1178	1531	1394	1552	1451	1134	1046	1176	1138	1616	1560	1601	1555	1236	1130	1210	1187	1154	1190	1182	1195	1056	1037	1045	995	1240	1180	1322	1235	1203	1203	1204	1273
ENSG00000077063	0	0	0	0	0	0	0	0	0	0	0	0	0	0	0	0	0	0	0	0	0	0	0	0	0	0	0	0	0	0	0	0	0	0	0	0	0	0	0	0	0	0	0	0	0	0	0	0
ENSG00000077080	0	0	0	0	0	0	0	1	0	0	1	2	0	1	1	3	0	2	2	1	2	1	0	0	2	2	3	2	0	1	1	0	1	1	2	0	0	1	0	0	0	4	3	0	1	2	0	1
ENSG00000077092	2	1	1	0	0	2	3	1	2	0	1	1	1	2	2	0	0	1	0	0	0	0	1	2	1	1	2	3	1	1	2	1	2	0	1	2	2	2	0	1	2	1	1	1	0	1	0	1
ENSG00000077097	3699	3564	3883	3678	3519	3304	3649	3462	2814	2690	2796	2742	3012	2821	2915	2792	2787	2643	2661	2568	3267	3044	3216	3130	2644	2537	2643	2589	3496	3312	3493	3441	3237	3198	3277	3149	3219	3136	3305	3169	2796	2591	2670	2675	3104	3105	3094	3054
ENSG00000077147	716	643	709	668	642	593	584	609	434	454	460	436	502	457	530	465	439	422	450	426	623	505	569	540	444	455	427	458	621	555	587	553	620	615	674	602	635	571	552	552	514	496	495	489	554	511	500	495
ENSG00000077150	108	83	93	82	120	142	155	131	140	129	173	140	116	121	143	123	137	138	142	125	151	128	138	129	155	160	120	144	150	98	142	137	97	103	115	111	163	152	169	160	124	116	140	109	119	99	111	134
ENSG00000077152	194	182	198	161	212	196	207	158	126	126	142	184	169	150	203	176	151	154	167	147	199	167	174	178	138	140	129	114	175	176	159	155	159	139	177	129	146	154	174	164	156	146	144	104	173	156	170	149
ENSG00000077157	95	74	77	75	74	65	69	57	64	59	76	58	59	53	60	62	69	73	85	81	73	57	63	69	88	74	83	63	51	45	72	71	70	56	69	61	52	55	62	61	63	80	69	66	66	62	61	60
ENSG00000077232	237	262	258	237	199	203	189	176	145	163	133	138	181	167	157	159	152	160	146	138	181	165	193	184	148	150	146	130	202	148	192	161	224	197	214	227	204	205	189	175	163	173	170	171	187	177	190	121
ENSG00000077235	296	283	272	291	263	259	255	262	425	402	419	413	361	353	353	366	396	378	430	373	283	305	290	284	356	361	388	399	320	342	353	307	355	330	331	330	266	300	292	294	368	323	363	326	338	373	337	347
ENSG00000077238	33	35	46	39	53	50	51	43	53	41	59	53	45	46	59	41	49	55	58	51	51	60	37	46	64	51	67	44	52	44	56	65	49	55	56	44	54	66	60	39	42	39	41	36	47	45	55	54
ENSG00000077254	248	220	244	263	236	193	194	216	166	158	187	169	176	169	191	200	162	159	208	173	197	215	223	176	197	158	182	160	193	194	227	212	221	223	196	196	177	179	200	182	195	167	164	168	165	183	208	223
ENSG00000077264	0	0	0	0	2	1	0	0	0	0	0	0	0	0	0	0	0	0	0	0	0	1	0	1	0	0	0	0	0	0	0	0	0	0	0	0	0	0	0	0	1	0	0	0	0	0	0	1
ENSG00000077274	0	0	0	0	0	0	0	0	0	0	0	0	0	0	0	0	0	0	0	0	0	0	0	0	0	0	0	0	0	0	0	0	0	0	0	0	0	0	0	0	0	0	0	0	0	0	0	0
ENSG00000077279	0	0	0	0	0	0	0	0	0	0	0	0	0	0	0	0	0	0	0	0	0	0	0	0	0	0	0	0	0	0	0	0	0	0	0	0	0	0	0	0	0	0	0	0	0	0	0	0
ENSG00000077312	206	211	223	233	193	133	164	167	304	313	289	291	305	262	313	273	302	312	338	325	230	198	217	210	277	270	292	305	268	285	297	296	243	252	258	242	211	218	218	194	258	232	283	253	289	260	301	289
ENSG00000077327	0	0	0	0	0	0	0	0	0	0	0	0	0	0	0	0	1	0	0	0	0	0	0	0	0	0	0	0	0	0	0	0	0	0	0	0	0	0	1	0	0	0	0	0	0	0	1	1
ENSG00000077348	66	58	71	67	64	53	69	60	139	131	142	120	110	131	118	139	145	133	119	112	85	73	82	76	106	104	97	87	125	104	111	130	88	75	97	95	80	65	69	79	88	89	101	99	110	112	120	128
ENSG00000077380	181	163	203	176	160	157	148	149	161	121	149	147	154	170	152	174	171	151	144	142	139	142	137	131	155	156	163	125	165	163	173	137	167	148	160	143	178	126	147	136	128	132	154	152	163	176	176	153
ENSG00000077420	473	505	512	493	377	390	397	379	517	503	499	519	443	364	424	374	515	440	451	460	385	375	398	407	430	435	488	374	467	463	441	432	439	461	496	488	426	356	395	350	473	414	475	482	456	407	403	365
ENSG00000077454	86	88	97	82	81	71	78	60	173	167	165	159	126	140	124	117	143	169	166	153	101	122	108	102	146	138	153	148	147	126	110	110	105	105	138	113	101	82	90	76	114	119	130	126	131	116	145	112
ENSG00000077458	132	148	150	137	150	114	103	114	108	90	97	104	81	80	103	102	96	101	95	87	113	108	105	144	114	103	94	82	87	103	117	111	139	116	128	133	125	129	99	113	124	99	113	103	108	80	99	87
ENSG00000077463	31	32	46	34	34	25	38	39	46	68	63	72	61	56	67	66	62	57	74	51	51	48	45	43	66	54	68	53	69	63	58	48	43	68	54	45	52	56	40	47	50	52	56	53	53	53	50	72
ENSG00000077498	0	0	0	0	0	0	0	0	0	0	0	0	0	0	0	0	0	0	0	0	0	0	0	0	0	0	0	0	0	0	0	0	1	0	0	0	0	0	0	0	0	0	0	0	0	0	0	0
ENSG00000077514	251	233	250	217	217	206	228	196	182	185	187	173	201	188	224	194	159	188	197	162	249	225	228	195	199	182	191	168	206	201	214	206	220	190	204	189	191	191	184	202	171	170	182	170	194	196	200	165
ENSG00000077522	0	0	0	0	0	0	0	0	1	0	0	0	0	0	0	0	0	0	2	0	0	0	0	0	0	0	0	0	0	0	0	1	0	0	0	0	0	0	0	0	0	0	0	0	3	0	0	0
ENSG00000077549	369	364	349	374	363	343	361	342	454	402	403	437	439	412	403	442	458	391	454	423	410	401	412	360	376	379	333	377	394	416	429	392	391	347	375	336	405	404	376	397	362	361	334	334	484	412	422	408
ENSG00000077585	0	1	0	0	0	2	4	2	1	0	0	0	0	2	0	1	2	2	0	1	2	1	2	2	0	0	1	2	1	0	2	2	3	0	0	2	1	0	1	1	1	2	2	0	2	3	0	1
ENSG00000077616	1	6	9	5	6	8	4	9	3	1	3	5	4	9	4	6	4	3	8	1	4	4	3	8	9	6	3	6	4	4	8	0	1	3	8	5	3	5	1	7	5	6	8	7	1	5	6	10
ENSG00000077684	281	251	297	272	191	207	205	242	267	264	234	247	250	241	227	281	276	252	281	290	213	191	216	200	237	223	215	220	225	245	225	222	255	239	280	255	195	210	210	189	226	228	234	215	248	237	246	240
ENSG00000077713	73	50	64	69	31	42	45	45	60	54	59	51	38	40	49	38	46	53	46	56	51	43	39	44	48	51	50	74	42	57	41	52	50	56	52	61	40	38	39	44	67	46	72	55	47	34	39	48
ENSG00000077721	190	152	190	195	220	184	203	225	137	130	132	142	150	136	149	154	116	135	117	115	186	156	188	182	142	138	137	142	148	163	165	154	186	155	176	169	226	194	175	199	144	140	132	124	144	153	161	157
ENSG00000077782	27	17	29	32	66	61	85	61	31	31	23	26	64	54	59	62	34	31	52	44	94	82	83	82	41	31	37	31	77	80	73	63	44	41	54	44	119	94	108	104	39	29	44	28	80	61	74	76
ENSG00000077800	3	4	5	5	3	4	4	4	8	14	5	9	4	5	3	3	7	11	9	5	3	4	2	3	9	7	10	5	5	7	6	4	3	4	8	8	2	4	3	5	3	6	4	4	4	3	3	6
ENSG00000077935	2	0	2	3	0	1	3	5	0	1	1	1	2	3	0	1	0	0	1	3	4	0	1	2	0	0	1	2	2	0	1	1	6	4	1	0	3	2	1	1	0	1	0	1	1	3	0	1
ENSG00000077942	11	13	10	8	16	17	12	13	18	11	11	15	6	14	14	12	21	15	17	8	11	17	14	24	14	18	12	7	15	11	18	9	18	13	10	14	17	23	21	14	10	11	7	11	20	16	21	9
ENSG00000077943	1	5	3	2	7	3	13	6	2	6	7	4	5	1	6	3	7	2	1	6	5	9	7	2	7	2	4	4	7	10	6	2	3	4	6	1	10	3	7	13	4	1	3	4	8	7	5	4
ENSG00000077984	86	81	92	76	99	84	89	98	158	118	137	132	129	126	120	116	119	115	114	123	130	113	110	116	155	110	121	141	112	99	114	102	104	112	113	120	93	95	110	97	118	95	116	94	115	106	122	111
ENSG00000078018	36	29	45	26	39	35	50	35	39	35	29	19	24	23	25	20	35	28	24	39	43	31	29	35	45	30	35	32	19	21	20	10	28	21	34	26	32	28	47	29	37	39	34	29	24	28	23	21
ENSG00000078043	155	133	136	142	143	139	131	115	94	93	96	99	117	109	80	95	93	100	95	110	113	98	119	124	89	91	90	99	115	117	107	113	125	132	137	113	124	103	132	134	80	104	107	110	104	100	118	100
ENSG00000078053	0	1	0	0	0	1	0	0	1	2	0	0	0	0	0	0	0	0	0	0	1	0	0	0	0	0	1	0	0	0	0	0	0	1	1	1	0	0	1	0	2	1	0	0	0	0	0	0
ENSG00000078061	92	74	101	87	84	75	96	73	174	156	191	142	138	131	153	121	142	139	161	160	125	90	102	108	163	132	123	123	126	134	130	124	111	124	112	119	114	124	95	93	115	101	124	102	143	128	145	144
ENSG00000078070	155	179	160	133	122	137	144	122	141	144	157	175	136	140	146	145	164	127	132	134	155	105	144	127	151	154	160	144	152	137	116	119	152	133	149	139	140	119	140	105	156	137	125	132	132	131	142	145
ENSG00000078081	1	0	0	0	0	0	1	0	1	1	0	0	0	0	0	0	0	0	0	1	0	0	0	0	0	0	0	0	0	0	0	0	0	0	0	1	0	0	1	0	0	0	1	0	0	0	1	0
ENSG00000078098	0	0	0	0	0	0	0	0	0	0	0	0	0	0	0	0	0	0	0	0	0	0	0	0	0	0	0	0	0	0	0	0	0	0	0	0	0	0	0	0	0	0	0	0	0	0	0	0
ENSG00000078114	0	0	1	0	0	0	0	0	0	0	0	0	0	0	0	0	0	0	0	0	0	0	0	0	0	0	0	0	0	0	0	0	0	0	0	0	0	1	0	0	0	0	0	0	0	0	0	0
ENSG00000078124	62	80	78	74	53	58	65	64	50	43	50	34	46	37	48	53	52	37	38	35	48	36	62	46	53	46	49	53	54	54	53	62	71	63	72	60	58	56	50	55	47	50	37	53	47	39	40	44
ENSG00000078140	351	353	337	360	310	246	316	272	242	207	229	191	211	206	233	235	206	242	231	232	278	225	242	217	228	208	200	194	259	294	261	253	310	288	300	312	264	278	236	252	253	256	266	248	249	224	225	258
ENSG00000078142	289	274	283	278	347	377	384	351	230	239	198	213	291	271	276	264	219	190	209	217	352	318	353	310	224	232	207	243	282	262	292	320	209	213	210	236	305	278	303	306	206	187	189	214	272	289	266	266
ENSG00000078177	348	367	333	339	505	466	465	442	285	273	272	278	302	285	294	263	270	257	297	235	531	409	420	436	314	298	301	320	358	376	363	339	377	304	322	283	457	447	408	454	252	265	248	274	365	351	330	311
ENSG00000078237	45	37	53	40	33	32	44	45	25	32	28	29	40	32	36	27	37	28	23	26	46	39	43	39	30	27	20	35	33	39	43	36	53	49	38	49	54	46	43	50	35	21	30	28	34	36	43	41
ENSG00000078246	64	62	71	58	57	42	47	46	75	58	73	49	56	51	68	26	51	52	82	58	52	58	50	64	68	69	71	62	50	61	57	52	67	68	66	54	45	36	34	54	61	54	70	52	60	40	51	51
ENSG00000078269	99	112	111	115	131	134	118	128	99	93	102	106	97	106	86	82	107	114	107	111	110	131	111	122	105	85	127	94	109	116	99	94	93	111	122	107	117	97	121	126	107	119	103	117	102	115	114	102
ENSG00000078295	2	0	0	1	1	1	2	3	2	0	1	0	2	1	1	2	1	0	1	2	1	2	2	1	0	1	2	0	0	0	2	1	0	0	0	2	5	0	3	1	0	1	1	1	2	1	1	1
ENSG00000078304	3499	3331	3585	3289	3072	3027	3050	2964	2798	2668	2779	2598	2915	2866	2886	2942	2662	2542	2742	2531	2981	2816	2862	2840	2950	2799	2973	2870	3478	3316	3420	3233	3374	3167	3278	3221	2915	2884	2984	2857	3049	2952	3012	2837	3075	2930	3079	3022
ENSG00000078319	35	30	48	38	32	38	36	36	35	50	53	59	38	32	39	41	43	34	45	43	32	33	39	23	44	48	51	36	40	51	35	49	36	40	40	47	32	33	32	21	35	43	38	33	51	43	50	40
ENSG00000078328	0	0	0	0	0	0	0	0	0	0	0	0	0	0	0	0	0	0	1	0	0	0	0	0	0	0	0	0	0	0	0	0	0	0	0	0	0	0	0	0	0	0	0	0	0	0	0	0
ENSG00000078369	1214	1125	1265	1203	1026	1006	1043	990	1312	1202	1406	1309	1384	1276	1371	1309	1395	1273	1299	1312	1098	1063	1128	1064	1219	1193	1206	1122	1310	1244	1285	1252	1171	1170	1098	1209	1127	1092	1091	1034	1134	1099	1106	1076	1344	1316	1289	1337
ENSG00000078399	194	185	178	189	120	122	128	114	165	134	150	154	118	143	126	125	161	131	164	136	125	137	135	105	175	156	177	182	181	206	199	206	232	211	197	228	146	157	137	156	178	167	185	155	167	163	140	153
ENSG00000078401	0	0	1	1	1	0	0	0	0	0	1	0	0	0	1	1	0	1	0	0	1	0	0	0	0	0	0	0	0	1	2	0	0	0	1	3	0	1	1	1	0	0	0	0	0	0	0	1
ENSG00000078403	246	199	236	208	196	167	213	199	189	192	191	170	226	206	197	193	193	189	217	213	186	183	193	173	218	215	205	197	206	183	237	212	197	197	189	182	149	156	182	168	209	195	189	177	220	197	206	203
ENSG00000078487	20	23	17	30	31	28	27	35	16	25	19	18	12	24	18	22	16	24	18	20	31	29	22	30	18	16	19	18	18	24	10	20	22	18	28	17	23	20	28	29	16	18	15	14	21	22	25	20
ENSG00000078549	0	0	0	0	0	0	0	0	0	0	0	0	0	0	0	0	0	0	0	0	0	0	0	0	0	0	0	0	0	0	0	0	0	0	0	0	0	0	0	0	0	0	0	0	0	0	0	0
ENSG00000078579	0	0	0	0	0	0	0	0	0	0	0	0	0	0	0	0	0	0	0	0	0	0	0	0	0	0	0	0	0	0	0	0	0	0	0	0	0	0	0	0	0	0	0	0	0	0	0	0
ENSG00000078589	0	1	1	0	0	0	0	0	0	0	1	0	0	0	0	1	0	0	0	0	0	1	1	1	0	0	0	0	0	0	0	1	0	0	0	0	0	0	0	0	0	0	0	0	0	1	2	0
ENSG00000078596	1	1	1	0	0	0	1	0	1	0	0	1	1	0	0	2	0	0	0	0	0	0	0	0	0	1	0	0	1	1	0	0	0	1	0	0	2	0	0	1	0	0	1	0	2	0	0	1
ENSG00000078618	458	448	459	442	392	345	374	381	371	358	331	337	349	319	339	383	395	366	384	405	369	366	354	349	400	387	375	365	410	351	421	385	485	426	395	381	350	341	362	352	402	361	400	362	376	374	365	370
ENSG00000078668	432	358	442	387	296	265	297	293	304	308	309	309	337	299	365	330	328	288	311	338	296	313	287	307	290	288	313	286	360	339	337	331	339	288	355	367	306	261	284	261	369	282	276	300	318	346	335	336
ENSG00000078674	893	826	894	861	1074	989	1056	981	792	805	803	750	830	873	897	841	723	701	778	746	990	911	908	892	804	726	740	729	977	938	945	967	735	741	797	724	949	860	913	840	703	669	629	644	940	925	934	888
ENSG00000078687	49	47	47	47	34	40	40	40	63	62	53	55	45	49	46	38	63	50	58	50	33	36	46	34	36	47	43	39	45	33	35	31	52	42	39	46	41	48	45	59	41	45	60	52	49	46	41	39
ENSG00000078699	107	81	87	75	82	91	96	88	108	108	108	104	102	99	101	89	104	112	82	113	108	95	100	93	91	108	132	114	92	100	100	89	100	97	98	101	81	82	77	71	92	95	116	101	104	84	97	91
ENSG00000078725	0	0	0	0	0	0	0	0	0	0	0	0	0	0	0	0	0	0	0	0	0	0	0	0	0	1	0	0	0	0	0	0	0	0	0	0	0	0	0	0	0	0	0	0	0	0	0	0
ENSG00000078747	229	214	204	201	175	167	183	193	144	139	156	140	147	145	163	143	158	165	165	148	197	168	151	168	159	148	167	155	163	156	149	147	168	209	209	181	147	175	132	161	169	156	161	180	173	166	155	138
ENSG00000078795	2	2	0	1	4	5	2	5	2	0	2	0	1	0	2	0	1	1	2	4	0	1	1	2	1	0	1	0	1	1	2	1	5	1	1	2	1	0	2	3	0	2	2	1	3	0	2	1
ENSG00000078804	34	36	52	46	46	47	45	41	57	38	44	52	40	30	38	44	54	38	47	41	42	59	51	49	36	51	38	39	41	40	50	46	44	45	52	52	58	32	59	34	44	51	37	41	27	44	51	40
ENSG00000078808	195	163	168	161	145	157	157	153	273	291	300	251	271	241	270	231	245	265	286	263	208	214	229	179	240	239	237	207	249	255	272	228	244	224	266	234	210	208	178	155	252	213	226	230	231	246	280	224
ENSG00000078814	15	11	12	12	12	8	22	17	25	27	30	30	22	12	10	17	21	31	24	20	13	22	11	11	26	23	27	25	16	7	11	15	13	22	13	18	13	11	12	8	14	14	21	16	16	18	9	21
ENSG00000078898	1	0	0	0	1	0	0	0	0	0	0	0	0	0	0	0	0	0	2	0	0	1	0	0	0	0	0	0	0	0	0	0	0	1	0	2	1	0	0	0	0	0	1	0	1	0	0	1
ENSG00000078900	7	4	13	11	21	15	24	17	18	10	14	16	24	18	16	19	9	10	10	9	37	26	24	21	10	11	10	10	17	13	18	14	6	7	9	11	25	21	25	17	10	10	10	16	15	18	11	15
ENSG00000078902	66	51	58	67	60	59	66	55	87	111	94	110	82	77	99	88	93	87	93	76	89	84	82	74	80	95	79	64	73	87	78	83	74	75	84	74	86	78	78	88	86	92	88	82	95	71	91	86
ENSG00000078967	11	17	13	9	9	13	14	14	12	12	12	17	8	8	14	8	7	11	10	13	11	6	10	8	9	13	14	11	10	14	13	6	13	19	12	12	9	12	12	6	11	14	12	9	18	4	4	13
ENSG00000079101	1	0	1	1	2	0	0	0	0	1	0	0	0	0	0	0	0	0	0	0	0	0	0	0	0	1	0	0	0	0	0	1	0	0	0	0	1	1	0	0	1	0	0	0	0	1	0	0
ENSG00000079102	0	0	0	1	0	0	1	0	0	0	0	0	0	0	0	1	0	0	0	0	0	0	0	0	0	0	0	0	0	0	0	0	0	0	0	0	0	0	0	0	0	0	0	1	0	0	0	0
ENSG00000079112	0	0	0	0	0	0	0	0	0	1	0	0	1	0	0	0	0	0	1	1	0	0	0	0	0	0	0	0	0	0	1	0	0	0	0	0	0	0	0	0	0	0	0	0	2	0	0	0
ENSG00000079134	213	189	217	229	178	156	158	171	173	141	151	167	129	153	148	157	152	133	154	168	139	153	147	171	154	156	152	132	201	156	162	180	184	183	168	151	146	135	119	133	175	166	138	159	155	145	179	147
ENSG00000079150	47	53	43	45	29	31	32	34	45	36	41	28	37	16	33	24	28	24	21	24	34	25	45	33	16	26	28	22	30	38	28	37	36	39	26	35	36	24	24	26	38	25	19	27	32	30	33	23
ENSG00000079156	3	0	0	1	2	3	2	2	1	1	2	0	1	1	1	1	2	0	1	1	1	0	0	0	2	2	0	0	2	0	3	0	2	3	0	1	2	2	0	3	5	3	1	2	1	1	1	1
ENSG00000079215	1	0	1	0	0	1	0	0	2	1	1	0	2	1	0	0	1	1	1	0	2	1	1	0	1	0	1	1	0	0	1	1	0	0	1	0	0	1	1	1	0	1	2	1	0	0	3	2
ENSG00000079246	1357	1415	1438	1368	1220	1167	1257	1169	948	900	921	925	1223	1215	1205	1213	971	991	1063	1037	1165	1065	1126	1103	957	852	891	873	1329	1225	1354	1277	1211	1147	1163	1196	1163	1099	1107	1060	988	910	933	919	1231	1209	1206	1168
ENSG00000079257	19	19	15	15	8	15	15	14	6	11	9	16	10	14	19	11	12	15	10	8	20	14	10	10	15	9	19	14	13	14	18	15	15	17	13	12	13	14	18	8	17	19	16	19	15	7	13	11
ENSG00000079263	1	1	1	0	0	2	4	2	2	1	2	1	1	2	1	0	1	1	1	0	2	1	1	1	0	1	1	2	3	2	4	2	0	1	2	1	1	1	1	4	0	0	3	1	5	2	2	0
ENSG00000079277	96	80	79	87	79	75	80	74	96	87	85	90	75	86	69	73	97	90	101	104	62	77	78	96	90	98	96	88	77	78	96	72	75	72	75	83	83	74	72	79	87	78	89	77	90	77	91	80
ENSG00000079308	52	46	47	42	91	89	91	85	80	110	122	95	71	60	61	67	92	117	92	100	90	93	88	101	103	89	112	114	61	57	63	56	53	47	61	50	75	79	75	72	74	70	79	71	66	52	63	62
ENSG00000079313	119	135	129	128	120	97	89	97	226	182	213	193	171	164	158	148	200	193	192	181	154	106	136	114	173	161	201	162	185	156	187	171	177	168	169	165	129	140	133	132	182	197	154	155	170	125	157	131
ENSG00000079332	323	280	339	273	282	270	268	244	205	193	246	188	261	216	245	236	234	231	231	244	258	219	266	221	213	213	235	222	265	273	266	261	299	284	290	272	265	267	250	260	240	237	206	257	274	254	256	251
ENSG00000079335	41	33	28	31	40	32	31	29	31	27	29	28	24	26	33	21	23	23	35	24	24	35	27	33	22	27	31	28	21	26	15	24	24	31	42	29	29	26	31	18	25	32	36	26	31	32	29	17
ENSG00000079337	1	7	4	6	22	10	6	8	8	3	8	10	8	1	7	4	5	8	6	11	14	10	7	11	4	16	10	9	8	6	6	4	4	3	3	3	11	10	4	4	5	7	3	9	12	5	4	3
ENSG00000079385	7	5	6	7	14	10	11	12	4	3	3	10	1	4	3	3	4	4	4	8	13	7	7	13	4	4	8	9	3	5	5	2	5	5	1	1	9	11	10	8	8	6	6	8	4	9	8	6
ENSG00000079387	158	117	167	123	130	117	131	115	83	104	92	78	108	95	107	92	107	96	101	96	116	126	143	109	97	75	98	93	112	91	123	112	148	114	124	117	132	97	119	96	106	105	101	90	103	118	117	105
ENSG00000079393	0	0	0	0	0	0	0	0	0	0	0	0	0	0	0	0	0	0	0	0	0	0	0	0	0	0	0	0	0	0	0	0	0	0	0	0	0	0	0	0	0	0	0	0	0	0	0	0
ENSG00000079432	269	266	268	261	252	248	279	250	510	478	483	518	411	356	382	405	580	489	485	484	360	317	351	339	518	458	522	482	397	377	360	358	402	355	407	389	296	290	284	286	385	343	409	390	387	393	388	369
ENSG00000079435	5	2	7	2	7	1	6	3	8	12	5	12	7	9	8	6	9	11	10	7	6	7	5	7	9	4	6	7	10	7	7	5	5	3	6	9	3	6	8	4	5	8	6	6	8	4	9	7
ENSG00000079459	1221	1122	1270	1164	932	925	942	897	1095	1074	1126	1123	1163	1130	1137	1075	1181	1099	1216	1122	965	916	974	904	1065	1020	1110	1011	1038	1002	1044	1028	1055	1109	1114	1061	848	802	879	746	1053	1004	1012	1052	1079	983	1080	1001
ENSG00000079462	44	41	48	32	47	45	41	37	58	79	67	74	70	60	87	67	80	79	93	91	51	52	40	61	86	75	72	67	65	48	77	64	44	51	55	41	57	45	57	51	62	54	59	57	74	77	63	60
ENSG00000079482	27	20	20	16	18	24	24	21	14	16	18	20	14	19	8	11	14	20	15	18	16	12	15	20	13	20	11	17	13	16	17	20	12	15	21	23	18	17	14	19	24	17	13	10	14	19	15	18
ENSG00000079557	0	0	0	0	0	0	0	0	0	0	0	0	0	0	0	0	0	0	0	0	0	0	0	0	0	0	0	0	0	0	0	0	0	0	0	0	0	0	0	0	0	0	0	0	0	0	0	0
ENSG00000079616	317	234	271	255	214	244	243	228	381	377	410	386	409	387	440	364	389	391	386	378	331	320	307	265	357	341	375	345	417	372	363	358	255	246	269	279	266	272	290	290	299	298	309	279	387	379	402	348
ENSG00000079689	0	0	0	0	0	0	0	0	0	0	0	0	0	0	0	0	0	0	0	0	0	0	0	0	0	0	0	0	0	0	0	0	0	0	0	0	0	0	0	0	0	0	0	0	0	0	0	0
ENSG00000079691	3	1	1	2	4	3	4	4	1	2	3	1	1	1	1	0	1	2	1	1	5	2	4	4	0	0	2	5	1	1	0	0	2	4	2	2	3	1	8	4	3	2	0	0	1	1	1	1
ENSG00000079739	205	168	190	164	158	152	169	147	284	318	285	260	216	219	219	199	258	268	229	247	182	182	180	171	313	285	284	275	191	199	234	202	177	153	202	203	114	119	123	105	232	247	240	256	221	184	211	192
ENSG00000079785	449	478	470	482	381	330	352	344	310	320	320	315	370	346	357	344	373	311	340	322	352	313	343	305	315	341	325	327	426	354	404	395	453	421	431	429	352	349	349	326	344	314	347	347	389	377	395	376
ENSG00000079805	472	451	474	443	444	455	465	463	709	788	836	759	635	652	714	708	707	682	721	748	573	498	582	589	696	654	680	643	688	661	692	639	585	523	582	534	554	528	574	550	587	574	629	600	686	645	697	705
ENSG00000079819	378	328	377	366	359	374	378	371	324	318	308	324	323	304	327	347	319	283	296	299	305	346	326	306	327	309	302	309	339	311	347	325	327	316	316	274	343	309	317	286	314	309	345	328	357	320	334	336
ENSG00000079841	0	1	0	0	0	0	0	0	0	0	0	0	0	0	0	0	0	0	0	0	0	0	0	0	0	0	0	0	0	0	0	0	0	0	0	0	0	0	0	0	0	0	0	0	0	0	0	0
ENSG00000079931	0	0	0	0	0	1	0	1	0	0	1	0	0	0	0	0	0	0	0	0	0	1	3	1	1	0	0	2	0	1	0	0	0	0	2	0	2	0	1	0	0	0	0	0	0	1	0	0
ENSG00000079950	163	171	144	154	173	170	176	168	121	129	121	108	126	135	144	116	126	101	107	118	161	160	172	164	110	117	126	131	134	115	141	131	130	145	134	147	126	144	154	148	121	119	118	139	134	139	129	135
ENSG00000079974	42	42	37	36	29	28	37	34	49	40	37	51	45	50	51	36	50	41	47	51	36	52	35	34	39	47	53	45	42	43	45	34	49	39	42	49	37	33	28	43	39	39	36	47	44	37	40	47
ENSG00000079999	174	193	179	189	170	153	177	224	282	268	265	275	283	289	310	268	273	269	272	289	245	246	233	228	231	221	263	264	269	224	270	263	231	190	209	219	245	214	242	203	212	222	219	215	277	306	266	295
ENSG00000080007	0	1	1	0	4	1	1	2	2	1	1	1	0	1	1	1	0	3	0	1	2	3	0	1	1	1	1	1	0	1	0	1	1	2	0	0	1	3	0	1	1	1	1	3	0	2	1	0
ENSG00000080031	0	0	0	0	0	0	0	0	0	0	0	0	0	0	0	0	0	0	0	0	0	0	0	0	0	0	0	0	0	0	0	0	0	0	0	0	0	1	0	0	1	0	0	0	1	0	0	0
ENSG00000080166	1	0	3	0	3	6	2	2	1	1	0	1	1	0	0	1	1	0	3	0	1	1	0	1	0	0	2	2	1	1	0	1	0	0	2	1	0	2	0	1	1	0	1	1	0	0	2	0
ENSG00000080189	137	130	125	118	151	124	135	137	216	192	210	207	174	207	205	195	240	214	221	201	192	188	165	158	196	189	218	209	182	200	208	176	182	161	182	158	191	166	166	162	183	171	174	144	199	200	181	182
ENSG00000080200	45	40	43	31	44	43	44	43	41	20	23	30	25	26	33	34	31	38	44	36	39	54	33	54	45	33	33	48	34	41	45	45	41	32	33	40	39	32	37	43	38	46	36	38	39	37	42	43
ENSG00000080224	0	0	0	0	0	0	0	0	0	0	0	0	0	0	0	0	0	0	0	0	0	0	0	0	0	0	0	0	0	0	0	0	0	0	0	0	0	0	0	0	0	0	0	0	0	0	0	0
ENSG00000080293	0	0	0	0	0	0	0	0	0	0	0	0	0	0	0	0	0	0	0	0	0	0	0	0	0	0	0	0	0	0	0	0	0	0	0	0	0	0	0	0	0	0	0	0	0	0	0	0
ENSG00000080298	0	0	0	1	0	0	0	0	0	0	0	1	0	0	0	0	0	0	0	0	0	0	0	0	0	0	0	0	0	0	0	0	0	0	0	0	0	0	0	0	0	1	0	0	0	0	0	0
ENSG00000080345	619	554	574	543	620	633	645	609	453	404	495	444	533	528	541	502	474	384	403	436	637	604	572	613	427	377	383	385	590	565	576	578	489	487	524	492	606	567	580	595	397	396	365	375	548	574	586	510
ENSG00000080371	235	231	228	224	208	189	200	197	150	142	161	163	174	150	158	140	141	173	153	138	192	173	197	180	158	142	161	156	179	194	181	173	221	213	207	211	194	186	188	194	157	189	198	191	160	155	150	150
ENSG00000080493	0	0	0	0	0	1	1	2	0	0	0	1	0	0	1	0	0	1	0	0	0	1	1	0	1	0	1	0	0	0	1	0	0	0	0	1	2	1	1	2	0	0	0	0	0	2	2	0
ENSG00000080503	578	547	606	556	628	633	689	595	546	502	487	547	571	597	571	577	575	509	539	557	605	617	572	604	544	516	582	476	608	573	599	611	570	525	485	535	587	561	612	615	536	508	493	491	673	575	635	588
ENSG00000080511	0	0	0	0	0	0	0	0	0	0	0	0	0	0	0	0	0	0	0	0	0	0	0	0	0	0	0	0	0	0	0	0	0	0	0	0	0	0	0	0	0	0	0	0	0	0	0	0
ENSG00000080546	141	117	139	97	187	180	188	222	105	101	93	92	153	149	159	138	103	89	98	92	194	178	196	197	112	84	91	94	196	193	201	174	157	108	150	141	196	228	209	212	122	113	97	110	169	160	173	161
ENSG00000080561	0	0	0	0	0	0	0	0	0	0	0	0	0	0	0	0	0	0	0	0	0	0	0	0	0	0	0	0	0	0	0	0	0	0	0	0	0	0	0	0	0	0	0	0	0	0	0	0
ENSG00000080572	0	1	0	0	0	0	0	0	0	0	0	0	0	0	0	0	0	0	0	0	0	0	0	0	0	0	0	0	0	0	0	0	0	0	0	0	0	0	0	1	0	0	0	0	1	0	0	0
ENSG00000080573	0	0	0	0	0	0	0	0	0	0	0	0	0	0	0	0	0	0	0	1	0	1	1	0	0	0	0	0	1	0	2	0	0	0	0	1	0	1	0	0	0	1	0	0	1	0	0	0
ENSG00000080603	580	578	576	580	471	479	498	475	836	747	835	865	695	641	699	685	868	838	880	813	553	505	538	546	767	709	780	750	656	647	719	640	736	689	654	626	600	550	583	593	649	608	676	645	706	720	779	728
ENSG00000080608	235	202	233	214	167	152	156	158	149	158	169	171	180	177	162	156	176	168	168	167	164	174	162	149	174	167	130	156	186	199	200	203	185	194	206	194	161	177	179	154	158	148	178	134	177	199	206	181
ENSG00000080618	0	2	3	1	1	0	2	2	0	2	0	0	1	1	1	0	1	0	0	1	1	0	0	1	2	0	1	0	0	0	0	0	2	1	0	3	1	0	0	0	0	0	1	0	0	0	0	0
ENSG00000080644	2	6	4	1	5	1	6	3	4	1	6	5	5	1	4	0	3	4	3	6	5	8	1	4	6	4	4	5	7	3	3	4	4	5	0	4	2	2	3	1	3	6	3	2	1	3	2	5
ENSG00000080709	0	0	0	0	0	0	0	0	0	0	1	0	0	0	0	0	0	0	0	0	0	0	0	0	0	0	0	0	0	0	0	0	0	0	0	0	1	1	2	0	1	0	0	0	0	1	0	1
ENSG00000080802	129	104	131	113	97	111	108	102	88	80	96	107	79	77	89	100	100	95	107	90	70	84	93	86	102	119	110	107	87	69	85	91	111	106	126	99	100	118	102	97	92	88	115	88	110	97	79	99
ENSG00000080815	157	145	169	156	154	162	142	158	158	158	150	157	129	134	128	150	160	163	167	149	144	159	158	140	161	152	160	132	156	164	155	148	142	130	125	134	136	136	150	140	166	146	132	143	164	143	139	159
ENSG00000080819	146	135	153	148	88	107	129	106	124	127	99	124	113	112	119	128	108	128	108	123	121	124	111	98	106	120	97	113	112	127	116	146	163	137	140	124	100	91	109	102	114	115	140	128	130	106	125	128
ENSG00000080822	165	160	182	149	116	127	135	114	102	121	115	120	107	122	124	108	105	94	108	101	127	112	146	118	103	110	108	129	130	118	111	121	155	132	130	129	115	108	123	104	137	137	141	130	123	132	115	121
ENSG00000080823	51	57	46	53	52	53	45	61	57	63	69	60	42	62	83	62	68	42	54	68	49	65	57	59	54	51	57	59	67	54	48	64	49	63	45	47	37	54	65	59	70	42	63	50	62	71	58	82
ENSG00000080824	7504	7217	7641	7432	6174	5917	6295	5953	4800	4472	4681	4575	6363	5930	6233	5904	5313	5097	5302	5097	6016	5624	5840	5836	4908	4583	4718	4593	7059	6562	6854	6734	6751	6509	6607	6494	5949	5690	5766	5715	4978	4830	4830	4781	6455	6249	6386	6237
ENSG00000080839	324	273	322	286	264	253	246	243	197	202	197	179	228	181	228	193	224	205	213	213	233	228	231	213	204	203	225	210	250	212	240	256	260	243	253	246	231	208	253	219	237	220	234	207	215	205	230	225
ENSG00000080845	83	76	97	95	81	72	100	94	142	112	126	114	84	79	97	90	125	138	135	127	102	92	103	83	115	138	139	133	92	108	95	101	104	108	107	110	98	78	94	99	133	146	110	119	82	102	115	113
ENSG00000080854	0	0	0	0	0	0	0	0	0	0	0	0	0	0	0	0	0	0	0	0	0	0	0	0	0	0	0	0	0	0	0	0	0	0	0	0	0	0	0	0	0	0	0	0	0	0	0	0
ENSG00000080910	0	0	0	0	0	0	0	0	0	0	0	0	0	0	0	0	0	0	0	0	0	0	0	0	0	0	0	0	0	0	0	0	0	0	0	0	0	0	0	0	0	0	0	0	0	0	0	0
ENSG00000080947	16	18	16	11	13	11	13	18	7	10	20	14	17	12	16	18	15	12	15	15	20	12	7	6	19	12	18	13	11	12	8	7	27	7	15	17	10	4	8	10	12	12	14	9	18	6	8	17
ENSG00000080986	156	178	166	173	159	151	140	147	123	120	107	111	138	138	138	146	102	93	111	102	145	149	135	114	132	114	135	128	144	161	168	158	154	142	152	140	150	117	135	150	153	124	124	127	156	132	159	161
ENSG00000081014	93	89	101	93	92	83	74	88	60	57	59	62	70	54	69	55	68	69	62	56	87	95	77	83	53	58	47	69	83	67	80	71	83	74	87	95	78	107	99	90	56	45	66	59	65	60	62	65
ENSG00000081019	163	131	161	143	178	145	162	162	135	131	102	111	120	115	114	123	103	92	121	107	143	155	181	139	95	123	90	104	117	141	107	153	125	109	101	120	129	124	143	102	117	121	112	104	107	93	125	110
ENSG00000081026	34	39	46	44	43	43	41	40	44	35	39	39	29	32	23	40	36	37	30	42	41	40	46	39	36	31	33	22	31	36	28	41	53	31	48	31	48	45	44	44	38	35	44	34	41	46	34	23
ENSG00000081041	1	0	3	0	0	0	0	0	1	5	0	0	0	1	0	0	1	0	1	0	1	1	2	1	1	1	1	1	0	2	0	0	1	0	0	0	1	1	4	1	1	1	1	0	1	1	0	0
ENSG00000081051	0	0	0	0	0	0	0	0	0	0	0	0	0	0	0	0	0	0	0	0	0	0	0	0	0	0	0	0	0	0	0	0	0	0	0	0	0	0	0	0	0	0	0	0	0	0	0	0
ENSG00000081052	1	1	0	3	0	1	3	0	1	2	0	1	1	0	1	2	0	1	0	2	2	1	2	0	0	1	1	0	1	1	1	2	1	0	1	0	1	0	0	0	0	1	2	1	0	0	3	1
ENSG00000081059	6	4	6	8	4	8	8	7	8	8	9	6	2	8	9	2	5	7	7	1	11	10	12	11	3	8	6	6	5	5	6	6	4	2	4	4	10	8	18	12	5	10	4	5	7	12	7	8
ENSG00000081087	41	43	52	43	38	40	36	34	23	26	27	37	24	21	24	20	13	25	22	40	29	28	34	25	16	21	23	20	35	30	29	26	47	36	42	38	40	33	47	40	28	22	14	20	18	23	37	30
ENSG00000081138	0	0	1	3	0	0	0	0	0	1	0	1	0	0	1	0	1	0	0	0	1	0	0	1	0	0	0	0	0	0	0	0	0	0	1	0	0	0	0	0	0	0	1	1	1	1	0	0
ENSG00000081148	0	1	0	1	1	0	3	3	4	1	3	0	1	2	0	2	2	1	0	3	2	5	3	2	2	3	0	0	1	1	2	0	0	0	0	3	0	1	3	3	3	2	1	1	0	1	3	1
ENSG00000081154	438	438	498	427	360	353	361	340	335	300	303	322	337	307	326	310	325	317	332	325	365	307	325	326	376	284	308	328	406	411	378	336	418	433	408	381	361	357	346	371	354	336	351	352	340	349	370	317
ENSG00000081177	1	1	1	0	0	0	3	0	0	0	0	0	0	0	1	1	1	0	0	0	0	0	0	0	1	3	3	1	1	1	2	0	2	1	0	1	1	0	0	0	0	1	0	0	0	0	1	0
ENSG00000081181	8	6	6	12	7	14	5	7	10	7	13	11	12	5	6	11	12	5	8	10	8	8	7	10	11	10	10	12	5	14	8	4	5	8	13	11	5	8	8	11	12	9	6	17	4	8	9	10
ENSG00000081189	2035	1877	1959	1891	2063	1969	2008	1927	1632	1575	1637	1594	1782	1692	1766	1691	1683	1580	1576	1535	1973	1939	2004	1879	1650	1509	1597	1596	1900	1765	1853	1832	1876	1863	1871	1817	2014	1855	1910	1866	1688	1621	1620	1603	1763	1632	1673	1746
ENSG00000081237	1247	1166	1293	1211	1269	1190	1265	1237	1002	961	944	954	1116	1090	1133	1140	942	922	956	855	1094	1070	1083	1041	936	984	977	938	1141	1134	1231	1127	1050	1021	1030	1040	1076	1051	1097	1063	953	925	961	891	999	1031	1036	1033
ENSG00000081248	2	0	1	0	0	0	0	3	1	1	2	0	0	1	0	1	0	4	0	3	1	2	0	1	0	3	4	3	2	0	0	0	2	0	0	1	0	0	0	0	2	1	0	1	1	2	1	1
ENSG00000081277	0	0	0	0	0	0	0	0	0	0	0	0	0	0	0	0	0	0	0	0	0	0	0	0	0	0	0	0	0	0	0	0	0	0	0	0	0	0	0	0	0	0	0	0	0	0	0	1
ENSG00000081307	160	138	138	147	116	111	131	121	108	90	93	81	110	91	87	90	107	87	84	115	133	107	116	104	87	93	107	111	147	110	132	135	127	128	111	114	109	117	103	114	113	110	110	109	102	89	111	118
ENSG00000081320	143	117	152	124	169	163	154	158	115	121	112	103	116	122	115	111	118	97	96	96	162	147	147	145	115	121	120	98	138	103	138	115	135	143	128	140	148	140	130	146	131	120	118	127	137	106	99	114
ENSG00000081377	14	13	13	11	17	10	16	16	10	14	8	11	12	8	9	14	8	4	15	10	15	16	14	17	18	12	18	15	7	15	13	13	7	7	13	13	26	16	24	25	11	11	15	13	21	15	14	8
ENSG00000081386	99	93	116	83	95	116	115	113	77	77	83	74	95	76	100	74	90	75	93	84	80	81	106	91	73	90	109	81	94	93	101	99	85	98	107	87	90	108	101	115	97	88	82	94	112	89	80	95
ENSG00000081479	0	0	0	0	0	1	0	0	0	0	1	0	0	0	1	1	0	1	1	0	0	0	0	0	0	1	0	0	0	0	0	0	0	0	0	0	0	0	0	0	1	0	0	0	0	1	0	0
ENSG00000081665	111	113	93	110	107	86	92	104	81	61	90	67	79	88	76	78	92	74	86	90	89	70	75	73	94	89	82	80	68	89	67	67	91	86	84	104	89	78	69	85	85	56	81	90	80	94	89	80
ENSG00000081692	20	10	15	17	14	18	15	16	27	16	25	27	46	28	34	39	34	21	32	33	21	19	16	27	18	23	29	24	31	34	25	20	16	23	19	16	23	21	18	25	22	19	27	25	24	28	29	27
ENSG00000081721	69	66	77	76	53	62	50	58	60	53	67	48	55	64	63	59	85	67	77	82	62	51	51	57	76	69	71	59	73	76	82	73	75	100	75	84	55	54	43	60	79	61	75	72	59	57	57	50
ENSG00000081760	92	79	85	76	111	104	103	102	148	153	137	106	117	148	125	111	122	114	125	115	121	115	125	143	137	124	130	107	114	130	106	115	96	76	95	83	127	105	96	123	111	91	115	105	121	110	97	136
ENSG00000081791	181	201	171	189	164	163	180	161	228	231	248	241	230	197	215	190	215	205	219	217	174	197	202	171	239	204	229	246	228	191	229	229	196	191	195	212	200	176	187	187	214	189	213	225	232	239	226	244
ENSG00000081800	0	0	0	0	0	0	0	0	0	0	0	0	0	0	0	0	0	0	0	0	0	0	0	0	0	0	0	1	0	0	0	0	0	0	0	0	0	0	0	0	1	0	0	0	0	0	0	1
ENSG00000081803	0	0	0	0	1	0	0	0	0	0	0	0	0	0	0	0	0	0	0	0	0	0	0	0	0	0	0	0	0	0	0	0	0	0	0	0	0	0	0	0	0	0	0	0	0	1	1	0
ENSG00000081818	0	0	0	0	0	0	0	0	0	0	0	0	0	0	0	0	1	0	0	0	0	1	0	0	0	0	0	0	0	0	0	0	0	0	0	0	0	0	0	0	0	1	0	0	0	0	0	0
ENSG00000081842	0	0	0	0	0	0	0	0	0	0	0	0	0	0	0	0	0	0	0	0	0	0	0	0	0	0	0	0	0	0	0	0	0	0	0	0	0	0	0	0	0	0	0	0	0	0	0	0
ENSG00000081853	0	0	0	1	1	0	1	0	1	0	0	0	0	0	0	2	1	0	0	0	0	0	0	1	0	0	0	0	0	0	0	1	0	0	0	0	0	0	0	0	0	0	0	1	0	0	0	0
ENSG00000081870	106	96	111	106	126	113	116	116	75	78	84	102	90	101	88	93	81	78	84	82	100	96	118	121	75	94	100	83	85	99	119	106	103	105	97	89	103	83	113	98	89	87	99	88	102	79	105	87
ENSG00000081913	388	364	394	360	384	391	485	406	393	435	431	444	443	402	444	390	439	410	396	429	400	380	461	444	380	343	356	355	414	424	400	404	389	353	407	393	489	414	459	444	387	361	342	389	407	423	390	405
ENSG00000081923	8	11	13	12	18	10	8	9	3	8	4	3	10	7	5	5	2	4	9	6	8	6	6	6	8	5	9	10	9	11	7	14	12	8	14	7	6	5	6	11	8	6	6	9	15	10	10	9
ENSG00000081985	9	5	3	4	6	7	8	10	2	3	2	9	1	9	6	5	1	9	9	2	4	6	6	6	5	3	6	1	3	6	2	4	3	8	3	4	8	3	5	6	6	5	8	7	4	1	6	3
ENSG00000082014	7	3	11	10	6	5	4	6	7	13	8	7	7	9	4	5	10	9	11	4	6	4	4	8	4	3	5	7	2	2	4	8	3	8	10	7	2	4	5	8	7	5	8	5	8	3	3	9
ENSG00000082068	92	77	99	84	76	68	77	70	78	88	77	80	78	77	83	67	82	76	76	75	74	73	88	67	78	78	59	89	77	74	79	84	74	89	75	87	85	73	64	59	72	73	81	64	97	84	77	79
ENSG00000082074	0	0	0	0	2	0	1	1	0	0	0	0	0	0	1	0	0	0	2	0	1	1	0	0	0	1	1	0	0	2	0	0	0	0	1	0	3	4	1	1	0	0	1	1	0	0	3	0
ENSG00000082126	0	0	2	1	0	0	1	1	0	0	0	0	3	0	0	0	0	0	1	1	1	1	2	0	0	0	1	0	0	0	1	0	0	1	1	0	2	1	0	0	1	0	3	2	0	2	0	0
ENSG00000082146	58	49	62	53	40	47	72	41	49	38	48	37	33	37	41	30	48	39	42	35	53	43	41	45	57	44	51	34	49	44	42	44	58	66	67	53	44	54	42	43	52	46	46	35	41	39	39	39
ENSG00000082153	845	844	849	806	676	640	708	675	527	483	529	523	593	577	596	571	526	529	491	486	672	635	640	572	508	513	580	476	741	712	752	728	791	706	758	723	711	666	707	650	537	535	603	552	646	634	577	591
ENSG00000082175	0	0	0	0	0	0	0	0	0	0	0	0	0	0	0	0	0	0	0	0	0	0	0	0	0	0	0	0	0	0	0	0	0	0	0	0	0	0	0	0	0	0	1	0	0	0	0	0
ENSG00000082196	11	10	15	7	8	6	9	10	5	11	10	9	10	3	5	4	9	6	3	9	4	6	5	6	9	8	12	6	11	7	11	15	4	5	6	8	7	3	4	7	10	12	11	8	13	7	7	6
ENSG00000082212	382	370	434	410	315	281	307	299	248	265	280	256	253	267	261	234	273	282	277	257	303	278	278	256	271	291	290	232	280	293	297	275	367	377	387	344	286	303	292	282	278	281	257	279	302	250	275	265
ENSG00000082213	95	102	87	98	86	55	68	57	58	69	69	48	83	57	74	52	72	76	66	62	72	59	66	64	68	68	60	64	73	81	76	73	96	97	104	90	79	81	71	70	56	61	76	62	69	63	73	75
ENSG00000082258	225	207	207	207	194	171	178	185	140	153	156	140	163	171	149	161	161	156	150	154	178	169	184	169	133	144	143	131	203	172	152	148	169	158	181	165	173	152	169	154	163	163	151	133	178	171	147	141
ENSG00000082269	107	108	108	116	92	84	91	92	77	76	85	98	100	73	63	79	78	79	72	84	88	81	104	77	104	80	76	70	80	73	94	78	95	87	105	68	101	95	95	95	85	84	91	71	89	94	75	74
ENSG00000082293	0	0	1	1	0	1	1	0	0	0	1	0	0	0	1	0	2	0	1	0	1	0	1	1	2	0	0	1	0	1	1	2	1	0	1	1	0	2	2	0	2	1	0	0	0	1	2	1
ENSG00000082397	0	1	0	0	0	0	0	0	0	0	0	0	0	0	0	0	0	0	0	0	0	0	0	0	0	0	0	0	0	0	0	0	0	0	0	0	0	0	0	0	0	0	0	0	0	0	0	0
ENSG00000082438	11	4	15	5	6	7	7	4	7	6	9	5	7	3	5	3	4	7	6	1	3	5	13	7	10	6	7	10	11	6	7	6	12	9	11	13	8	11	7	4	4	5	8	5	11	3	10	5
ENSG00000082458	127	141	132	118	157	156	129	129	160	151	151	156	134	147	157	175	136	149	150	150	148	132	136	141	147	153	136	144	135	144	135	150	135	133	136	115	122	100	107	123	132	133	140	125	133	134	151	154
ENSG00000082482	0	0	0	0	0	0	0	0	0	0	0	0	0	0	0	0	0	0	0	0	0	0	0	0	0	0	0	0	0	0	0	0	0	0	0	0	0	0	0	0	0	0	0	0	0	0	0	0
ENSG00000082497	0	0	0	0	0	0	0	0	0	0	0	0	0	0	0	0	0	0	0	0	0	0	0	0	0	0	0	0	0	0	0	0	0	0	0	0	0	0	0	0	0	0	0	0	0	0	0	0
ENSG00000082512	12	12	14	22	22	17	26	16	11	13	17	13	20	7	15	10	19	9	15	16	19	18	31	18	24	15	17	15	17	19	26	16	17	18	13	21	26	19	23	17	11	20	18	17	17	28	18	21
ENSG00000082515	63	60	53	79	46	60	48	42	68	62	52	53	58	76	62	53	51	56	72	50	47	57	39	53	54	39	57	54	57	65	64	54	65	60	60	74	45	45	53	40	63	77	68	58	57	59	46	55
ENSG00000082516	239	246	259	222	198	229	199	196	213	207	203	184	221	232	204	203	226	194	207	188	190	212	188	212	192	178	162	193	225	202	223	197	234	220	258	207	171	195	216	174	206	175	171	222	217	221	233	231
ENSG00000082556	0	0	0	0	0	0	0	1	0	0	0	0	0	0	0	0	0	0	1	1	0	0	0	0	0	0	0	0	0	0	0	0	0	0	0	0	0	1	0	0	0	0	0	0	0	0	0	0
ENSG00000082641	252	244	283	257	277	307	290	261	346	354	330	337	352	319	339	345	397	337	348	356	339	321	351	326	332	294	330	328	311	275	344	287	290	308	322	291	299	292	302	299	276	292	307	289	306	294	304	316
ENSG00000082684	0	0	0	0	0	0	0	0	0	0	0	0	0	0	0	0	1	1	0	0	0	1	0	0	0	0	0	0	0	0	0	0	0	0	0	0	0	0	0	0	0	0	0	0	0	0	0	0
ENSG00000082701	164	135	184	169	118	131	130	134	131	145	143	127	131	113	124	119	135	135	147	143	137	131	126	127	135	136	132	124	151	115	136	131	170	142	136	152	146	134	120	117	157	141	153	139	153	108	120	133
ENSG00000082781	89	79	112	114	172	147	182	149	181	160	181	168	227	212	218	181	144	120	168	161	192	173	172	167	150	143	134	133	166	202	178	170	98	93	120	92	177	145	175	171	109	116	122	115	197	151	188	151
ENSG00000082805	123	117	140	124	126	119	140	123	106	108	133	127	113	94	115	117	152	125	129	127	131	111	116	86	127	103	121	103	112	109	100	83	126	125	113	111	128	121	127	114	111	120	105	111	120	91	129	102
ENSG00000082898	1372	1335	1368	1380	1175	1121	1235	1083	913	951	897	874	959	959	978	890	900	884	893	889	1116	1009	1060	991	1002	991	994	871	1162	1136	1274	1128	1293	1217	1199	1210	1076	1051	1062	1017	1006	994	1039	949	1038	983	1035	989
ENSG00000082929	0	0	0	0	0	0	0	0	0	0	0	0	0	0	0	0	0	0	0	0	0	0	0	0	0	0	0	0	0	0	0	0	0	0	0	0	0	0	0	0	0	0	0	0	0	0	0	0
ENSG00000082996	73	89	93	83	61	57	57	58	65	70	52	67	54	72	83	70	70	52	70	52	63	64	59	44	74	77	76	67	70	72	73	66	85	67	81	71	65	51	53	64	70	63	74	64	67	76	70	68
ENSG00000083067	0	1	0	0	0	0	3	2	0	0	1	1	1	0	1	0	1	0	2	3	0	0	0	0	0	0	3	1	2	1	3	1	1	1	0	1	2	1	1	0	2	2	0	1	2	1	0	2
ENSG00000083093	87	69	88	88	76	74	80	97	59	55	56	65	68	55	64	54	70	71	58	56	62	68	80	61	56	45	52	54	61	76	78	67	81	91	74	66	79	70	70	70	51	73	64	72	61	67	48	81
ENSG00000083097	83	84	69	70	86	69	93	85	56	55	57	53	89	64	67	62	72	57	65	65	78	78	77	80	48	57	65	68	69	70	75	68	79	71	73	70	90	64	82	89	55	56	61	55	82	66	77	65
ENSG00000083099	81	99	101	97	71	94	78	70	63	73	54	62	72	62	78	59	81	72	57	56	86	70	97	64	71	70	71	61	88	72	78	75	78	65	81	90	87	67	58	59	67	71	66	69	65	73	84	63
ENSG00000083123	61	53	84	52	54	65	64	46	40	58	48	59	60	62	47	66	54	49	54	49	74	55	55	52	45	52	50	45	61	57	57	73	62	59	60	49	60	52	36	47	59	36	38	55	53	43	53	45
ENSG00000083168	637	680	665	641	526	544	586	552	618	633	598	603	541	504	569	558	600	628	621	627	522	474	487	468	564	471	591	540	563	505	517	520	586	548	595	568	499	504	577	478	564	534	549	597	541	549	558	565
ENSG00000083223	127	126	109	135	141	114	125	117	118	84	92	112	117	101	117	116	121	107	121	108	117	131	106	120	127	114	119	103	131	102	113	128	106	93	127	107	131	111	114	107	106	120	134	102	125	127	109	122
ENSG00000083290	10	12	10	9	29	24	34	26	8	14	13	9	18	14	13	10	14	9	9	9	24	22	30	17	19	13	8	12	13	16	15	15	17	14	12	16	25	32	26	20	7	16	15	19	5	13	6	13
ENSG00000083307	0	0	0	0	1	0	0	0	0	0	0	0	0	1	0	0	0	0	0	0	0	0	0	0	0	0	0	1	0	0	0	0	0	0	0	0	0	0	0	0	0	0	0	0	0	0	0	0
ENSG00000083312	817	759	802	783	743	738	740	718	545	504	534	557	690	612	706	681	564	545	566	568	726	680	762	721	564	526	567	579	797	751	734	777	737	755	745	692	727	694	666	712	593	615	605	622	662	687	712	675
ENSG00000083444	201	200	217	209	218	244	295	258	472	437	438	468	431	390	393	376	429	395	444	397	329	350	349	313	427	415	466	417	364	333	372	352	274	254	295	243	255	246	245	253	339	373	329	317	374	355	365	312
ENSG00000083454	18	22	18	12	19	12	17	23	32	22	28	37	24	24	14	31	26	33	19	27	26	16	19	18	26	24	32	30	20	20	23	24	27	21	15	16	23	19	19	21	33	26	21	21	19	22	27	24
ENSG00000083457	76	62	73	79	55	58	72	54	63	68	50	57	70	63	53	64	57	56	59	50	54	58	74	66	52	64	53	69	78	56	62	66	62	74	63	74	54	63	52	53	69	53	77	65	67	66	85	56
ENSG00000083520	301	272	288	254	208	233	258	222	209	177	214	186	208	225	231	211	220	205	219	210	242	186	257	234	207	199	195	195	251	257	300	229	265	250	229	247	212	233	263	214	206	199	214	192	223	220	256	217
ENSG00000083535	66	62	83	80	40	48	65	50	48	57	58	57	63	41	41	57	55	41	65	57	60	52	56	45	50	59	44	43	56	56	60	56	63	51	66	49	67	59	62	52	60	50	54	62	43	52	78	54
ENSG00000083544	49	46	41	51	22	33	29	34	46	42	42	32	36	46	49	43	42	36	52	32	40	34	47	36	32	47	50	42	42	47	46	52	45	58	51	41	33	35	38	37	43	46	47	35	53	40	43	38
ENSG00000083622	0	0	0	0	0	0	0	0	0	0	0	0	0	0	0	0	0	0	0	0	0	0	0	0	0	0	0	0	0	0	0	0	0	0	0	0	0	0	0	0	0	0	0	0	0	0	0	0
ENSG00000083635	36	47	51	47	41	36	44	41	29	39	22	32	31	38	43	35	38	27	30	36	39	26	33	36	37	37	28	32	41	34	46	27	40	46	51	49	38	42	46	33	35	52	34	38	52	52	41	41
ENSG00000083642	338	266	310	310	275	263	266	249	238	215	225	210	226	229	231	240	209	225	235	224	274	244	298	244	218	209	222	199	305	266	277	296	278	249	253	261	242	281	259	228	229	247	244	225	241	240	246	244
ENSG00000083720	416	365	374	361	380	315	376	335	290	309	265	282	318	283	344	306	329	314	297	282	332	284	340	316	309	306	299	268	355	332	313	295	348	338	333	309	335	313	336	299	284	274	276	291	290	306	320	316
ENSG00000083750	37	45	46	43	30	29	29	35	33	42	25	35	23	28	44	38	38	40	28	38	39	24	21	27	50	51	40	40	49	41	36	40	39	38	44	34	22	32	41	38	34	49	33	33	40	39	37	39
ENSG00000083782	0	0	0	0	0	0	0	0	0	0	0	0	0	0	0	0	0	0	0	0	0	0	0	0	0	0	0	0	0	0	0	0	0	0	0	0	0	0	0	0	0	0	0	0	0	0	0	0
ENSG00000083799	98	78	70	64	111	107	101	107	48	61	53	49	68	54	70	64	60	58	61	45	102	67	78	73	58	48	68	62	80	80	64	40	66	50	80	62	77	84	90	83	51	57	57	57	77	62	71	77
ENSG00000083807	12	17	13	11	12	9	12	6	24	29	21	20	32	21	25	25	21	21	22	23	14	13	13	18	24	16	17	18	22	19	18	17	12	22	17	23	13	14	7	13	15	18	23	20	22	23	19	19
ENSG00000083812	27	39	34	39	23	37	41	33	50	56	54	61	53	58	69	57	57	51	62	53	46	29	37	45	55	40	49	51	49	48	55	51	41	42	40	41	41	31	44	39	75	45	52	53	59	55	64	52
ENSG00000083814	43	37	47	39	32	33	50	48	49	66	56	56	38	50	41	41	45	48	60	54	49	42	57	42	61	32	53	60	44	44	47	43	43	45	45	52	32	33	42	34	49	59	44	35	55	39	52	55
ENSG00000083817	31	28	28	32	28	23	21	20	22	20	28	21	20	25	22	22	24	27	17	25	19	25	19	23	29	26	26	22	17	29	21	11	30	30	18	25	26	18	19	18	12	19	25	22	15	34	24	20
ENSG00000083828	35	36	46	42	37	24	29	49	29	27	37	26	32	39	29	29	42	26	23	36	38	32	29	33	29	31	36	33	35	36	35	37	46	33	32	40	31	27	34	22	27	34	35	35	41	46	30	26
ENSG00000083838	15	12	21	10	14	15	13	13	32	31	25	29	37	29	21	30	32	28	29	29	22	17	21	21	25	30	39	28	23	18	19	22	23	14	18	18	16	16	19	14	17	23	15	20	22	15	28	18
ENSG00000083844	2	1	3	2	0	1	3	2	0	1	0	0	1	2	1	0	3	2	2	0	1	2	1	4	1	1	0	0	1	3	1	2	1	0	0	1	1	1	0	2	0	1	0	1	2	0	0	4
ENSG00000083845	1292	1125	1318	1220	1251	1249	1342	1232	2486	2295	2381	2358	2760	2606	2801	2687	2258	2193	2259	2147	1880	1774	1791	1832	2003	2020	1985	1955	2167	2006	2165	2093	1457	1426	1469	1488	1473	1471	1420	1408	1780	1760	1729	1745	2360	2313	2516	2389
ENSG00000083857	0	0	0	0	0	0	0	0	1	0	0	0	0	0	0	0	0	0	0	0	0	0	0	1	0	0	0	0	0	1	0	0	0	0	0	0	0	0	0	0	0	0	0	0	0	0	0	0
ENSG00000083896	398	403	438	440	347	330	368	356	350	370	338	327	318	356	334	359	412	344	375	360	331	338	329	332	376	353	344	343	377	379	389	400	361	362	393	351	343	347	348	313	378	363	394	365	370	356	348	362
ENSG00000083937	104	99	103	88	75	82	95	87	76	71	88	77	70	85	63	99	83	74	68	73	78	82	56	69	66	67	80	69	67	85	79	75	99	100	113	82	77	72	70	77	77	69	87	74	97	72	80	76
ENSG00000084070	222	193	210	196	215	224	220	239	190	223	223	223	204	243	208	209	203	193	247	204	254	245	255	241	211	220	207	228	203	202	215	211	174	178	176	178	243	224	233	228	212	185	189	199	219	196	214	172
ENSG00000084072	58	70	61	54	56	48	70	52	84	86	72	74	79	84	83	75	86	60	68	71	76	64	74	47	61	82	73	92	84	64	97	79	62	85	78	66	49	57	62	66	67	64	65	70	80	74	76	90
ENSG00000084073	115	109	133	124	100	80	97	98	62	46	56	54	70	74	64	73	66	57	73	68	86	74	86	68	59	49	61	50	86	75	74	59	109	130	116	115	87	88	86	71	68	73	80	67	85	70	82	63
ENSG00000084090	891	894	945	939	814	751	818	790	716	701	669	655	709	662	724	711	670	638	716	686	733	669	691	696	653	688	729	662	840	781	836	754	847	809	860	813	770	730	751	741	692	642	655	660	770	723	762	777
ENSG00000084092	162	148	149	156	118	122	138	141	206	165	207	169	159	132	172	152	202	173	153	136	143	128	166	131	168	146	164	159	164	140	154	177	166	150	169	152	150	125	128	144	172	151	157	152	173	146	165	136
ENSG00000084093	476	439	425	422	490	438	492	446	375	357	333	356	378	308	338	388	360	343	386	337	456	411	426	400	364	348	369	334	384	391	434	397	412	372	381	374	381	406	405	424	355	356	377	351	395	356	387	393
ENSG00000084110	2	3	2	1	0	0	0	1	0	0	2	0	1	1	3	0	1	2	2	0	0	1	1	0	1	1	1	2	2	0	1	5	0	2	0	2	0	0	2	1	0	0	2	0	1	0	1	1
ENSG00000084112	64	69	79	54	79	61	75	69	88	78	82	90	73	69	68	67	83	68	68	84	70	70	74	74	62	73	76	81	72	78	66	73	83	88	72	62	94	88	90	76	75	59	74	80	99	69	79	64
ENSG00000084207	383	368	379	335	327	286	362	305	666	629	663	610	614	673	661	605	650	630	661	627	457	412	464	467	571	517	553	508	588	546	576	529	476	439	466	439	451	403	435	398	471	495	481	503	598	574	627	565
ENSG00000084234	400	330	389	356	569	526	524	491	377	357	387	356	475	416	453	432	418	421	423	419	495	538	556	505	407	390	379	392	425	387	462	415	397	373	353	367	528	498	548	526	347	361	321	311	458	412	458	421
ENSG00000084444	74	69	82	71	61	68	59	62	79	78	92	72	53	65	69	64	79	68	82	78	66	74	62	63	86	67	77	87	57	59	70	71	73	71	80	56	61	54	58	61	68	71	66	64	65	79	59	60
ENSG00000084453	0	2	2	1	0	0	0	1	0	0	0	1	1	0	0	0	0	0	0	0	0	1	1	1	0	0	1	0	0	0	0	0	0	0	0	0	3	1	0	0	1	0	0	0	0	1	0	1
ENSG00000084463	354	362	343	324	311	290	285	288	322	327	323	332	335	319	331	331	342	345	340	326	321	272	266	272	348	353	339	314	342	368	325	320	350	327	299	330	295	291	255	274	314	329	285	300	323	338	300	313
ENSG00000084623	366	356	350	316	257	257	281	250	454	460	412	429	371	397	386	346	441	471	445	445	332	290	316	268	377	369	393	359	357	328	387	358	301	320	366	332	285	270	293	244	301	337	332	320	404	421	419	385
ENSG00000084628	0	0	1	0	0	0	0	0	0	0	0	0	0	0	1	0	1	0	1	0	0	1	1	2	3	0	0	0	0	0	0	0	0	0	0	0	1	1	0	1	0	0	0	0	1	0	2	0
ENSG00000084636	1	3	0	0	4	2	2	7	1	1	0	1	1	3	2	4	0	3	0	1	5	2	3	3	3	0	1	1	3	2	0	1	1	0	1	1	5	6	2	1	7	0	2	1	0	1	2	1
ENSG00000084652	394	395	422	416	352	347	405	378	521	488	490	461	453	444	455	444	540	509	527	496	402	348	421	376	510	467	486	492	463	419	450	434	458	465	448	489	407	399	393	352	434	446	431	454	475	429	475	455
ENSG00000084674	0	0	0	0	0	0	0	0	0	0	0	0	0	0	0	0	0	0	0	0	0	0	0	0	0	0	0	0	0	0	0	0	0	0	0	0	0	0	0	0	0	0	0	0	0	0	0	0
ENSG00000084676	45	57	54	65	62	61	57	78	37	45	49	42	42	39	43	39	50	46	56	41	51	54	41	52	45	51	34	45	49	46	39	48	55	46	47	59	57	52	44	55	46	42	39	44	41	44	48	41
ENSG00000084693	124	131	156	155	131	112	119	120	209	200	226	219	152	165	163	159	201	164	223	207	141	125	141	133	220	179	194	188	163	166	153	194	181	160	150	126	117	111	111	121	177	157	172	158	188	157	213	191
ENSG00000084710	14	13	15	17	31	31	31	22	19	21	29	28	27	19	30	22	14	21	28	19	27	27	43	26	19	21	20	21	19	14	20	20	23	23	15	16	24	30	21	19	18	11	18	9	21	23	19	23
ENSG00000084731	67	46	53	56	76	58	79	52	85	88	85	92	77	73	86	50	83	79	107	80	70	79	81	77	109	90	99	103	75	51	49	59	67	76	74	69	82	78	66	75	60	70	85	74	81	84	82	75
ENSG00000084733	451	471	510	453	398	397	367	382	377	345	349	332	413	367	379	382	348	332	347	348	370	374	378	375	327	313	325	319	430	404	438	427	403	436	410	414	355	386	350	354	351	331	358	336	364	381	373	380
ENSG00000084734	0	0	0	0	0	0	0	0	0	0	0	0	0	0	0	0	0	0	0	0	0	0	0	0	0	1	0	0	0	0	0	0	0	0	0	0	0	0	0	0	0	0	0	0	0	0	0	0
ENSG00000084754	567	545	566	519	465	428	477	439	535	487	529	572	605	517	548	525	548	575	583	553	466	509	460	448	531	534	566	530	548	542	532	493	515	498	487	495	438	463	425	422	492	500	535	522	500	532	533	536
ENSG00000084764	2	0	0	0	0	0	0	1	1	2	0	2	0	0	0	1	2	0	1	1	1	3	0	1	0	2	3	2	0	0	0	2	0	2	0	0	2	0	0	2	0	1	0	0	0	0	0	0
ENSG00000084774	552	512	535	556	457	462	483	438	783	709	760	765	661	610	660	636	761	806	786	757	518	540	551	521	622	603	684	688	616	608	653	656	631	521	608	591	519	522	599	506	588	579	589	565	644	652	695	639
ENSG00000085063	344	359	372	339	426	402	456	425	319	303	282	308	350	318	362	356	309	276	317	311	400	399	420	404	280	304	305	310	364	326	355	329	358	308	312	303	387	365	393	406	302	322	299	265	356	354	377	385
ENSG00000085117	10	6	9	8	31	28	23	28	14	10	17	12	16	16	18	21	13	12	13	11	34	33	27	38	11	10	11	10	18	11	12	16	13	5	9	11	32	46	37	37	12	11	15	7	21	18	17	22
ENSG00000085185	51	29	32	46	42	53	54	40	72	62	68	67	56	41	43	42	79	65	74	90	52	37	67	46	71	63	72	58	32	42	46	33	54	53	54	57	44	39	45	53	37	41	57	54	51	57	53	61
ENSG00000085224	396	339	384	367	410	420	411	408	308	342	329	273	384	357	328	343	310	273	323	267	412	347	407	380	276	265	273	263	438	355	386	386	311	315	333	325	394	361	388	377	246	256	246	264	372	422	377	390
ENSG00000085231	92	80	84	87	58	70	61	45	49	57	61	49	42	50	61	46	54	58	66	51	57	57	61	53	53	51	54	63	58	55	59	53	75	92	96	80	72	60	69	65	68	75	67	67	61	69	66	63
ENSG00000085265	0	0	0	0	0	1	1	0	0	0	0	0	0	0	0	0	0	0	0	0	2	0	0	0	0	0	0	0	0	0	0	0	0	0	0	0	0	0	0	0	0	0	0	1	0	0	0	0
ENSG00000085274	66	56	60	56	64	49	48	68	43	48	43	57	54	45	46	50	36	48	27	47	72	45	54	34	28	42	38	49	73	53	59	50	60	66	46	51	60	48	50	40	44	43	46	50	48	39	69	51
ENSG00000085276	4	1	2	0	3	3	3	2	2	1	3	3	1	1	2	0	1	1	4	2	4	4	0	3	1	1	1	0	0	1	1	3	2	2	4	2	0	5	1	3	2	2	3	1	6	4	3	0
ENSG00000085365	137	146	150	140	118	129	143	128	109	90	106	96	115	109	108	105	94	95	104	102	105	126	109	136	123	111	97	104	149	126	116	130	146	126	143	121	104	101	115	97	121	118	111	127	117	114	122	112
ENSG00000085377	142	129	135	120	94	129	132	104	88	95	125	101	107	86	108	106	148	100	130	124	118	113	91	83	134	118	119	123	130	98	123	130	114	110	131	138	99	93	117	98	131	113	115	133	128	118	118	133
ENSG00000085382	89	80	93	77	82	75	78	75	74	76	60	62	61	54	61	58	57	79	78	72	84	87	75	75	98	80	104	77	72	78	75	71	73	68	79	85	72	60	82	59	79	91	95	75	59	68	81	77
ENSG00000085415	491	453	479	478	338	337	349	375	343	351	370	304	328	333	358	349	317	358	365	307	323	321	291	315	361	326	323	327	394	367	424	378	383	388	442	420	330	324	300	312	348	336	305	319	358	368	374	324
ENSG00000085433	81	88	96	77	99	82	110	100	68	77	73	63	70	68	89	72	79	68	77	65	104	79	83	82	74	62	66	72	87	78	79	76	89	83	90	90	78	85	64	86	68	61	75	63	75	81	96	68
ENSG00000085449	80	86	84	94	107	86	87	87	82	70	94	75	100	88	71	81	81	75	79	79	110	79	89	101	79	96	87	82	92	107	95	93	97	74	96	95	95	91	96	86	84	85	86	86	88	93	79	85
ENSG00000085465	6	11	6	6	4	5	8	3	4	2	4	9	2	3	6	5	6	5	5	6	4	3	6	4	6	6	2	4	2	4	3	6	4	6	2	1	3	5	1	1	5	3	5	2	8	2	4	3
ENSG00000085491	123	123	141	116	88	103	130	90	89	79	97	95	96	93	106	90	80	97	79	78	101	96	119	95	118	102	104	100	117	109	104	106	104	139	108	135	118	93	121	119	104	103	111	106	105	90	103	103
ENSG00000085511	204	168	178	169	143	127	138	112	147	125	157	150	152	129	162	136	159	137	156	151	139	127	154	132	147	145	167	141	131	150	161	133	150	170	166	148	123	159	114	113	142	128	134	134	160	153	158	158
ENSG00000085514	5	2	2	6	2	3	3	6	5	3	10	9	7	6	3	6	12	6	4	13	5	2	8	3	10	9	9	7	8	6	6	4	5	7	5	7	4	5	3	1	8	11	4	7	6	8	8	8
ENSG00000085552	0	0	0	1	2	1	0	0	1	2	3	4	1	0	1	0	2	3	0	1	0	2	0	0	1	2	1	1	4	1	0	1	0	1	0	0	2	1	2	1	0	3	0	1	0	1	0	0
ENSG00000085563	0	0	0	0	0	0	0	0	0	0	0	0	0	0	0	0	0	0	0	0	0	0	0	0	0	0	0	0	0	0	0	0	0	0	0	0	0	0	0	0	0	0	0	0	0	0	0	0
ENSG00000085644	35	29	38	29	28	29	25	41	64	62	68	53	39	36	47	42	58	61	53	49	36	40	38	36	45	42	56	60	41	60	47	37	44	41	38	51	43	34	31	35	68	43	48	46	39	47	42	49
ENSG00000085662	772	739	760	821	629	634	651	597	908	834	915	867	986	941	1010	936	973	922	979	912	822	710	701	695	891	837	876	855	962	919	972	828	779	764	795	831	683	691	721	704	755	759	772	743	977	933	945	942
ENSG00000085719	495	400	498	450	417	387	380	409	393	350	340	343	401	378	382	380	333	339	344	337	364	377	384	353	370	426	414	386	407	397	438	450	436	409	456	472	358	321	387	356	435	385	413	410	370	415	357	346
ENSG00000085721	164	146	182	163	155	140	167	141	132	143	114	130	141	122	161	125	138	113	141	117	146	142	110	168	132	116	116	103	130	148	151	136	172	172	141	150	182	144	153	143	133	128	140	122	130	133	131	136
ENSG00000085733	25	18	24	11	23	22	27	23	16	20	26	26	29	25	33	26	31	35	23	20	29	20	31	21	31	23	18	25	15	24	32	18	21	19	17	17	40	24	26	21	27	25	17	20	24	31	42	21
ENSG00000085741	0	0	1	1	1	2	0	2	3	1	5	4	0	1	1	4	2	2	6	1	3	0	1	2	1	1	0	4	4	4	2	2	1	2	1	3	0	0	0	0	1	3	0	0	2	1	0	1
ENSG00000085760	233	196	210	218	138	136	189	156	145	131	147	133	168	148	164	150	142	147	158	147	164	159	162	177	163	156	184	152	191	178	168	190	209	180	177	173	146	151	154	137	153	151	149	167	195	185	168	153
ENSG00000085788	314	301	334	348	237	225	218	230	263	214	237	256	231	209	228	215	250	205	221	255	215	200	200	212	272	277	330	268	236	267	264	255	303	303	276	285	205	186	196	180	247	263	281	264	216	221	220	230
ENSG00000085831	0	0	0	0	0	0	1	2	0	1	0	1	1	1	0	0	1	0	1	0	0	1	0	1	0	0	0	0	2	2	1	0	1	1	0	0	2	0	1	0	1	1	0	0	0	0	0	1
ENSG00000085832	371	337	369	383	284	280	343	282	267	261	268	247	292	239	283	278	284	280	256	280	303	263	265	284	267	245	262	294	292	282	287	281	332	301	345	325	284	276	276	244	277	279	287	267	283	279	262	247
ENSG00000085840	140	145	154	141	163	132	150	139	178	167	167	158	140	137	159	172	152	162	190	172	155	146	180	156	164	178	139	148	196	161	142	166	149	134	164	132	163	128	134	149	139	139	149	153	169	152	167	158
ENSG00000085871	65	60	50	57	59	57	74	62	42	54	49	57	57	48	53	51	50	49	50	55	46	62	73	66	55	61	55	41	56	54	56	57	55	55	58	46	66	46	57	45	38	48	40	55	53	59	55	55
ENSG00000085872	202	199	171	165	133	145	141	138	322	316	294	275	263	230	256	221	267	290	294	318	161	192	181	181	212	255	268	220	250	251	250	263	222	208	218	218	194	172	205	202	260	217	227	235	256	219	246	272
ENSG00000085978	81	77	72	77	68	79	66	81	75	62	94	69	89	79	73	84	87	87	91	75	71	73	77	69	72	75	50	65	72	70	78	61	80	82	76	69	70	81	71	76	56	80	72	60	78	69	89	92
ENSG00000085982	101	120	112	118	108	110	130	114	138	118	118	104	120	100	139	109	110	123	127	115	112	144	103	117	117	133	111	156	136	105	130	139	113	112	132	104	113	105	93	133	125	133	119	111	119	116	126	138
ENSG00000085998	64	82	79	76	73	69	80	71	123	98	114	103	106	103	119	116	110	99	101	112	92	80	85	92	124	95	100	93	101	97	96	102	85	89	104	96	98	95	88	106	94	91	97	75	98	102	99	102
ENSG00000085999	128	126	135	126	145	145	145	127	156	143	183	165	165	138	141	147	154	163	134	153	151	143	142	137	151	124	135	132	140	132	128	127	142	140	125	104	136	109	143	139	144	111	130	105	166	135	154	139
ENSG00000086015	112	107	122	95	132	112	116	123	154	138	142	143	147	104	131	129	143	154	170	140	161	129	148	163	132	113	148	126	134	114	133	133	129	123	133	128	145	121	152	138	131	124	121	116	136	142	134	108
ENSG00000086061	1020	941	970	942	738	755	773	760	681	580	599	584	781	718	732	737	720	667	704	659	735	650	740	698	648	627	606	662	750	731	802	759	871	830	774	798	703	706	724	678	678	601	634	558	807	711	693	823
ENSG00000086062	171	150	169	162	156	187	171	148	185	178	189	172	158	151	165	145	173	172	173	172	181	196	171	151	167	165	183	183	169	167	152	154	198	173	178	183	196	164	213	190	157	174	176	196	169	191	172	165
ENSG00000086065	108	98	131	113	107	93	106	104	106	93	96	94	110	92	109	98	81	81	82	89	108	103	105	95	80	80	95	82	95	107	99	94	123	89	83	91	89	100	107	100	75	98	103	87	100	94	113	100
ENSG00000086102	273	218	235	204	203	214	223	207	216	230	237	246	200	230	217	185	230	194	252	229	208	216	233	193	247	204	214	207	237	218	223	218	208	209	223	207	205	236	227	195	197	198	203	179	230	217	214	217
ENSG00000086159	0	1	0	2	0	2	0	1	0	1	2	2	0	0	0	0	0	0	0	1	0	0	0	0	0	0	0	1	0	2	1	0	1	0	0	1	0	0	0	1	1	1	1	1	1	1	1	0
ENSG00000086189	183	139	158	157	134	111	153	128	128	111	112	110	117	101	129	125	101	95	106	131	133	120	112	113	110	103	114	109	143	146	146	136	161	138	144	150	143	118	114	143	89	104	121	99	106	136	116	129
ENSG00000086200	145	154	159	153	120	115	113	132	99	80	108	85	126	108	99	122	99	75	88	103	103	116	108	102	88	101	89	91	117	120	133	122	125	105	121	119	95	110	111	91	110	92	100	83	118	120	112	109
ENSG00000086205	0	0	0	0	0	0	0	0	0	0	0	0	0	0	0	0	0	0	0	0	0	0	0	0	0	0	0	0	0	0	0	0	0	0	0	0	0	0	0	0	0	0	0	0	0	0	0	0
ENSG00000086232	324	300	342	337	282	273	259	296	279	319	288	313	307	271	284	268	274	285	285	274	266	292	276	260	330	264	318	291	326	291	315	276	331	278	291	277	286	254	251	236	342	304	276	282	334	293	319	280
ENSG00000086288	0	0	0	0	0	0	1	0	0	0	0	0	0	0	0	0	0	0	0	0	0	0	0	0	0	0	0	0	0	0	0	0	0	0	0	0	0	0	0	0	0	0	0	0	0	0	0	0
ENSG00000086289	47	65	47	62	54	55	43	45	37	44	49	43	54	39	40	43	54	41	47	59	61	40	53	42	44	46	60	68	48	37	57	46	77	69	82	54	52	52	36	46	59	62	52	39	42	50	35	35
ENSG00000086300	94	92	108	87	83	100	106	93	74	78	76	64	66	71	71	66	72	56	70	67	102	106	92	100	74	70	71	69	93	105	92	95	90	77	85	100	98	89	92	103	89	76	97	89	80	75	90	75
ENSG00000086475	280	241	258	227	175	168	176	177	208	232	202	187	234	218	219	235	233	230	231	237	177	176	177	175	191	186	219	162	247	257	226	214	239	223	253	251	202	200	184	179	197	195	192	202	226	222	216	210
ENSG00000086504	98	81	119	95	79	82	99	93	157	157	156	144	199	184	215	215	171	164	168	185	129	119	128	127	125	153	166	147	159	159	175	144	122	125	128	135	110	125	122	96	141	142	139	129	190	178	188	164
ENSG00000086506	0	0	0	0	0	0	0	0	1	0	1	0	0	0	0	0	1	0	1	1	0	0	0	0	1	0	0	0	0	0	0	0	0	0	0	0	0	0	3	1	1	0	0	1	0	0	0	0
ENSG00000086544	21	9	20	16	12	19	20	11	31	21	21	37	28	30	28	30	37	24	29	38	24	33	23	32	32	29	25	19	33	21	21	31	28	26	21	20	15	32	27	20	29	33	22	25	36	38	35	28
ENSG00000086548	0	0	0	0	0	0	1	1	1	0	0	0	0	0	0	0	0	0	0	1	0	0	1	0	0	0	0	0	0	1	0	0	0	0	0	0	0	0	0	0	0	0	0	0	0	0	0	0
ENSG00000086570	0	1	1	1	1	1	0	0	0	2	4	0	0	2	1	0	0	0	0	0	1	0	0	1	0	2	1	2	0	1	1	0	1	0	0	0	0	0	0	0	1	1	0	1	2	0	0	0
ENSG00000086589	253	232	230	198	181	152	178	197	213	174	222	177	191	168	184	192	194	190	199	184	163	167	176	161	223	177	199	202	212	203	209	194	202	201	212	232	185	199	171	182	183	161	231	188	216	194	206	209
ENSG00000086598	566	535	582	576	510	456	471	424	383	376	354	375	385	425	406	392	388	364	406	387	462	444	472	493	384	358	391	356	461	413	493	411	553	500	518	522	480	457	425	502	434	367	445	427	426	433	409	396
ENSG00000086619	29	30	46	38	31	37	35	29	28	22	29	18	19	20	13	12	16	22	19	24	28	33	27	36	29	20	25	43	21	22	29	26	30	22	24	26	33	26	24	31	19	25	23	20	19	22	23	18
ENSG00000086666	118	117	131	109	90	88	93	92	83	96	72	93	80	90	94	74	78	74	92	88	101	86	97	96	109	78	92	99	112	96	92	80	135	95	111	96	89	102	81	84	81	105	91	81	87	81	91	91
ENSG00000086696	0	0	0	0	0	0	0	0	0	0	1	0	0	0	0	0	0	0	0	1	0	0	0	0	0	0	0	0	0	0	0	0	0	0	0	0	0	0	0	0	0	0	0	0	0	0	0	0
ENSG00000086712	198	201	222	218	197	176	204	196	156	181	140	166	178	171	167	166	190	160	153	139	188	185	219	193	171	180	178	152	195	198	226	196	246	208	183	185	193	188	209	188	178	182	152	171	195	184	191	181
ENSG00000086717	1	0	0	2	1	1	0	1	0	0	1	1	1	1	1	1	0	0	0	0	1	0	0	1	1	0	1	0	1	1	1	1	2	0	1	0	0	0	1	0	0	0	2	0	0	0	2	1
ENSG00000086730	1210	1211	1214	1206	886	834	882	843	1585	1475	1637	1493	1452	1495	1567	1496	1611	1490	1588	1607	1066	1117	1115	1052	1486	1453	1557	1467	1566	1434	1486	1435	1278	1279	1347	1198	1033	958	944	929	1342	1268	1229	1275	1581	1588	1499	1555
ENSG00000086758	1249	1271	1284	1290	1128	1056	1156	1127	1561	1428	1501	1435	1266	1183	1288	1174	1546	1456	1512	1469	1107	1058	1128	1036	1357	1273	1362	1294	1246	1189	1263	1278	1357	1274	1333	1287	1155	1050	1147	1152	1248	1214	1230	1204	1335	1260	1317	1270
ENSG00000086827	87	82	82	88	79	58	68	64	63	56	64	49	63	71	67	70	67	67	50	58	62	74	51	78	63	63	69	61	65	83	72	72	72	69	92	70	74	56	63	78	72	56	55	38	78	59	68	72
ENSG00000086848	40	37	37	50	39	35	29	43	40	31	33	25	31	32	35	20	38	36	38	35	37	27	30	39	41	44	39	51	48	34	33	36	41	35	46	41	32	26	31	25	32	35	37	40	35	43	36	39
ENSG00000086967	0	2	2	0	1	1	2	1	1	0	1	0	1	3	5	1	0	0	2	0	3	0	0	1	0	2	1	3	1	2	2	3	1	1	1	3	0	0	0	1	2	1	1	1	2	0	1	1
ENSG00000086991	0	0	0	1	0	0	0	0	0	0	0	0	0	0	0	0	1	0	0	0	0	0	1	0	0	0	0	0	0	0	0	0	0	1	1	0	1	0	0	0	0	0	0	0	1	0	0	0
ENSG00000087008	34	34	35	30	41	35	33	41	60	54	56	48	46	43	44	42	43	46	44	54	47	39	45	50	48	66	50	45	35	43	47	38	41	39	38	45	39	35	43	35	45	49	43	50	49	32	40	51
ENSG00000087053	159	174	166	161	103	106	99	99	119	142	137	108	144	110	120	92	143	112	116	108	94	96	91	98	122	110	128	115	133	120	132	131	175	153	154	144	114	121	94	104	121	117	133	118	116	136	126	117
ENSG00000087074	70	52	54	49	58	51	51	48	97	81	90	81	77	95	103	90	84	57	88	61	47	62	60	55	94	111	109	86	89	69	66	70	60	58	64	58	63	52	55	42	80	76	82	71	73	73	86	59
ENSG00000087076	2	5	3	6	5	3	3	2	7	3	6	8	9	4	7	4	7	6	6	2	3	3	8	7	9	14	2	7	5	4	8	3	5	3	3	2	3	5	4	3	1	2	7	3	7	9	1	7
ENSG00000087077	147	159	149	121	147	153	136	143	249	228	239	222	235	209	217	209	231	207	252	209	203	167	215	195	225	233	193	198	201	188	196	201	165	161	175	176	185	167	163	176	192	186	177	193	211	197	214	193
ENSG00000087085	0	1	0	0	0	0	0	0	0	1	1	0	0	0	1	0	0	2	0	0	1	3	0	1	0	0	1	2	0	1	1	0	0	0	1	0	1	0	0	0	1	1	0	0	0	0	2	1
ENSG00000087086	859	765	859	812	861	813	836	804	1311	1392	1393	1314	1346	1304	1317	1314	1433	1376	1346	1342	1096	1103	1104	1073	1395	1320	1411	1346	1274	1211	1219	1190	1059	963	1053	979	1010	936	1002	970	1140	1134	1116	1136	1245	1280	1287	1308
ENSG00000087087	572	608	630	586	489	470	483	470	910	824	880	832	841	793	851	743	914	833	862	864	584	596	622	581	778	754	810	746	842	770	760	767	707	642	708	673	580	572	535	561	663	669	686	613	838	774	820	801
ENSG00000087088	104	98	104	74	151	140	147	142	155	139	154	181	221	205	215	202	161	158	171	186	171	183	211	199	133	119	148	145	204	172	209	183	132	136	150	152	193	218	187	160	128	116	127	111	227	218	200	205
ENSG00000087095	159	133	139	148	106	104	128	88	109	92	102	96	92	94	94	85	95	92	95	102	100	109	115	98	84	104	103	94	109	87	79	91	113	115	120	112	104	71	93	84	112	88	106	79	101	83	91	84
ENSG00000087111	140	113	142	137	114	99	88	94	171	160	184	167	139	152	145	163	182	158	158	179	125	123	139	122	142	150	192	155	126	145	130	120	123	144	123	131	123	97	106	118	123	124	128	146	133	147	132	157
ENSG00000087116	8	9	7	3	3	1	1	3	11	10	9	10	5	4	2	4	8	2	9	5	4	1	1	2	9	11	9	7	7	3	4	8	3	8	4	4	3	1	3	2	9	6	8	6	7	4	0	2
ENSG00000087128	0	0	0	0	1	0	1	1	0	0	0	0	0	0	0	0	0	0	0	0	0	1	0	1	0	0	2	0	2	1	0	0	0	1	0	0	0	0	0	0	0	0	1	0	0	0	0	1
ENSG00000087152	214	205	228	191	180	173	174	170	250	236	272	253	250	274	277	256	286	268	278	261	217	218	207	205	248	227	235	237	261	242	275	249	214	224	214	209	236	194	228	228	239	232	228	236	241	253	255	261
ENSG00000087157	72	61	73	94	62	64	60	58	110	101	89	117	93	74	92	90	109	97	106	107	75	77	74	61	78	75	98	84	89	90	84	103	81	71	91	88	65	65	77	72	94	88	80	67	98	78	88	86
ENSG00000087191	161	206	207	190	164	161	168	153	203	196	224	204	214	168	188	206	211	212	252	214	173	161	159	164	189	189	201	200	184	185	199	211	191	210	223	205	160	156	141	161	197	159	201	153	225	209	215	218
ENSG00000087206	155	137	163	144	111	108	123	115	134	113	117	124	154	118	131	114	146	134	152	147	129	104	119	123	127	95	132	117	125	125	128	132	142	129	110	111	93	116	113	111	137	108	117	85	129	143	137	135
ENSG00000087237	4	4	4	2	7	5	7	7	1	9	8	7	3	11	6	8	8	7	4	4	4	8	9	7	11	9	8	14	4	5	5	1	5	5	4	3	3	4	5	3	9	5	2	7	7	6	7	5
ENSG00000087245	0	0	0	0	0	0	0	0	0	0	0	0	0	0	0	0	0	0	0	0	0	0	0	0	0	0	0	0	0	0	0	0	1	0	0	0	0	0	0	0	0	0	0	0	0	0	0	0
ENSG00000087250	0	0	0	0	0	0	0	0	0	0	0	0	0	0	0	0	0	0	0	0	0	0	0	0	0	0	0	0	0	0	0	0	0	0	0	0	0	0	0	0	0	0	0	0	0	0	0	0
ENSG00000087253	0	1	0	1	0	1	1	1	0	0	0	0	0	2	1	0	2	0	0	1	0	0	2	0	0	0	1	1	0	2	0	0	1	0	0	2	0	0	0	1	1	0	0	1	0	1	1	0
ENSG00000087258	0	0	0	0	0	0	0	0	0	0	0	2	0	0	0	0	0	0	0	0	0	0	0	0	0	0	0	0	0	0	0	0	0	0	0	0	0	0	0	0	0	0	0	0	0	0	0	0
ENSG00000087263	171	168	186	170	136	159	133	108	103	108	123	102	128	111	132	137	133	136	129	122	105	104	137	125	108	119	113	104	122	126	136	137	164	125	160	138	125	112	131	146	119	108	112	99	108	126	131	137
ENSG00000087266	101	79	93	90	99	105	84	75	94	87	100	100	91	88	118	90	114	96	126	104	91	99	98	83	94	119	102	89	112	104	89	84	99	102	100	109	103	126	107	106	91	97	69	89	106	111	150	127
ENSG00000087269	400	323	358	354	277	276	308	294	347	324	341	313	319	337	340	352	363	373	361	357	296	277	288	264	314	267	303	292	328	313	367	345	363	336	386	355	291	310	272	300	326	275	280	291	340	326	341	345
ENSG00000087274	369	297	375	320	320	272	295	255	385	348	376	351	366	351	354	296	407	370	385	403	258	293	283	292	378	359	348	378	388	335	356	369	362	321	366	307	318	296	294	311	349	338	343	336	362	342	353	345
ENSG00000087299	84	78	86	88	86	55	55	76	64	79	48	60	69	53	59	59	62	73	64	65	61	77	58	55	76	73	67	72	68	55	86	73	92	78	71	96	58	68	62	57	69	51	61	81	49	58	59	78
ENSG00000087301	104	98	108	87	113	112	113	116	72	65	72	83	85	72	88	72	63	82	54	57	102	97	103	103	78	77	72	81	104	97	81	78	98	84	103	75	110	110	95	97	82	78	74	83	90	86	86	80
ENSG00000087302	296	323	328	289	229	192	212	192	248	227	215	222	247	208	217	240	221	216	216	230	219	174	208	223	230	219	242	211	257	233	221	218	277	272	289	225	217	190	231	201	218	217	205	222	208	239	268	252
ENSG00000087303	19	24	20	23	17	28	26	36	39	46	39	44	38	30	19	21	35	27	28	31	25	31	30	35	30	37	42	32	20	22	34	22	15	15	19	17	28	28	29	30	33	35	28	37	31	27	31	34
ENSG00000087338	176	166	175	190	151	147	159	135	146	150	140	142	145	137	155	144	129	121	158	142	141	142	145	147	151	114	132	145	171	119	137	141	162	145	150	161	153	148	154	146	136	170	174	132	141	121	137	129
ENSG00000087365	692	663	720	630	555	546	583	543	790	818	829	783	845	807	829	811	862	810	866	832	635	614	614	635	787	743	778	718	847	777	779	838	697	712	697	716	673	587	635	638	716	685	741	661	782	795	819	760
ENSG00000087448	118	109	111	94	102	79	94	107	68	67	67	68	55	69	75	81	93	95	87	74	101	85	89	92	73	65	69	67	87	77	89	80	117	110	115	107	112	119	108	104	86	93	93	64	79	81	87	83
ENSG00000087460	2052	1918	2281	1957	1758	1738	1730	1756	2835	2674	2626	2677	2600	2397	2569	2496	2622	2511	2673	2546	2023	1969	2038	2035	2568	2390	2622	2425	2562	2382	2594	2340	2181	2064	2129	2145	1938	1837	1878	1826	2377	2180	2277	2190	2611	2484	2596	2611
ENSG00000087470	420	390	383	417	305	259	311	300	257	243	299	251	259	270	266	241	263	300	289	282	322	312	282	271	300	301	302	265	316	291	343	305	347	316	329	330	285	272	273	276	270	273	291	260	318	288	253	262
ENSG00000087494	0	0	0	0	0	0	0	0	0	0	0	0	1	0	0	0	0	0	0	0	0	0	0	1	0	0	0	0	0	0	0	0	0	0	0	0	0	0	0	0	0	1	0	1	0	0	0	0
ENSG00000087495	1	1	2	1	1	1	3	1	0	1	1	0	1	2	0	0	1	2	1	0	1	2	1	1	0	0	1	0	0	1	0	1	1	0	2	0	2	0	3	1	0	0	2	1	0	1	2	1
ENSG00000087502	125	139	137	126	106	82	118	116	91	87	85	83	81	83	68	89	72	65	74	89	105	104	113	92	87	76	79	69	93	81	105	92	111	108	116	108	97	104	90	97	90	86	101	79	103	83	98	79
ENSG00000087510	4	2	5	0	2	2	4	0	2	1	0	0	3	1	4	1	1	1	1	2	1	5	3	1	2	1	0	1	2	2	4	1	2	3	3	1	3	0	2	4	0	1	3	0	1	1	0	2
ENSG00000087586	129	103	129	119	92	91	93	94	108	100	124	101	118	118	116	119	123	117	121	117	100	84	87	94	73	108	112	94	110	92	110	123	117	115	115	111	79	93	110	96	118	89	91	110	115	114	111	125
ENSG00000087589	1	0	1	0	1	0	0	2	0	0	0	1	0	1	0	0	0	2	0	2	0	1	2	0	0	1	2	1	1	0	1	0	0	0	0	0	0	0	0	0	1	3	0	0	0	0	0	0
ENSG00000087842	17	23	23	20	12	9	10	8	11	11	9	17	14	12	12	13	21	13	17	15	11	21	13	11	13	22	21	15	13	15	10	7	23	17	18	29	16	10	11	12	11	12	13	8	16	7	17	10
ENSG00000087884	8	18	12	11	8	16	16	11	14	13	14	17	14	10	11	17	22	19	16	19	10	8	6	7	18	17	12	20	21	18	19	17	16	18	22	19	12	9	10	10	19	15	18	23	12	19	11	17
ENSG00000087903	40	37	43	30	40	31	32	33	59	57	56	63	53	57	41	50	56	48	48	59	49	28	39	34	47	51	62	43	48	29	42	49	42	44	52	36	28	25	31	24	46	53	49	42	35	45	45	33
ENSG00000087995	77	65	59	61	46	55	65	49	42	56	55	56	39	49	56	56	57	64	53	42	47	52	41	44	51	47	52	52	67	68	57	53	69	68	61	61	50	53	50	51	53	51	58	45	56	62	56	52
ENSG00000088002	0	0	0	0	1	0	0	0	0	0	0	0	1	1	1	0	0	0	0	2	0	0	0	0	2	0	1	1	0	0	2	0	0	0	0	1	0	1	0	1	0	0	0	2	0	1	0	1
ENSG00000088035	83	89	90	98	74	55	50	61	69	66	43	67	43	36	52	59	40	53	48	44	71	70	64	61	58	49	51	69	79	60	69	53	90	85	67	62	56	76	42	59	59	69	49	51	61	58	58	49
ENSG00000088038	113	124	153	153	94	109	107	114	214	204	225	207	147	155	178	152	211	173	192	205	141	130	134	108	203	171	199	172	165	161	166	160	162	148	159	173	152	115	137	151	151	146	171	159	161	171	184	151
ENSG00000088053	2	0	2	0	4	0	1	2	1	0	2	1	1	5	1	3	3	1	2	3	1	4	3	1	1	3	1	5	1	2	2	4	3	3	1	2	4	1	4	2	1	3	2	1	3	3	2	4
ENSG00000088179	55	65	55	63	63	55	50	60	48	38	50	33	44	43	55	45	43	41	47	46	54	54	46	48	53	41	45	44	45	55	48	46	51	57	56	68	44	40	48	51	42	37	53	34	46	44	49	36
ENSG00000088205	538	499	532	565	457	400	406	396	369	380	363	363	412	439	437	410	354	357	399	386	393	410	451	428	379	392	354	366	483	472	468	430	422	468	459	429	404	413	399	374	385	390	410	367	468	416	452	406
ENSG00000088247	948	891	1000	999	808	718	830	758	1444	1347	1370	1360	1272	1112	1257	1186	1451	1336	1393	1358	1023	945	977	955	1184	1141	1232	1150	1183	1168	1279	1163	1202	1093	1237	1095	985	928	1010	987	1160	1084	1178	1157	1189	1202	1231	1199
ENSG00000088256	23	21	24	17	30	16	24	27	32	34	35	40	28	27	28	32	43	33	30	34	37	36	23	30	32	40	29	46	26	38	36	35	26	26	25	33	26	35	36	29	29	20	33	25	30	36	40	30
ENSG00000088280	8	4	4	11	20	14	16	12	14	13	11	10	9	11	15	14	12	11	12	13	20	17	11	11	17	12	4	15	7	8	11	7	11	12	12	13	12	12	16	21	15	7	14	6	17	14	12	16
ENSG00000088298	52	56	50	39	34	33	32	26	69	61	68	59	51	39	57	50	62	62	79	63	46	31	39	34	57	53	51	60	49	50	56	41	50	57	48	48	41	42	37	38	54	49	62	44	50	44	46	60
ENSG00000088305	38	42	44	47	49	45	58	58	35	49	46	47	44	45	38	42	49	45	45	40	55	55	48	51	49	41	35	42	32	42	37	49	39	40	40	51	52	63	78	67	45	49	46	39	38	38	46	40
ENSG00000088320	0	0	0	0	0	0	0	0	0	0	0	0	0	0	0	0	0	0	0	0	0	0	0	1	0	0	0	0	0	0	0	0	0	0	0	0	0	0	0	0	0	0	0	0	0	0	0	0
ENSG00000088325	688	656	689	649	538	528	568	531	570	586	587	537	580	550	599	504	571	549	544	570	497	408	477	451	560	518	548	575	618	587	649	559	559	548	577	527	460	462	467	497	541	498	554	484	615	528	567	556
ENSG00000088340	3	2	3	5	3	2	2	3	7	9	11	3	2	2	4	1	5	2	5	1	1	2	2	4	5	6	6	5	4	1	5	1	4	0	3	1	0	1	4	3	4	3	5	4	4	3	3	4
ENSG00000088356	76	69	76	67	46	58	65	67	70	82	89	78	87	85	80	87	87	92	90	81	80	66	60	57	74	64	78	88	65	65	89	85	79	62	72	76	67	61	73	67	82	67	82	64	99	91	112	82
ENSG00000088367	1	0	1	1	0	2	1	1	5	2	2	1	2	0	4	0	1	0	2	2	4	1	2	2	3	0	0	2	1	1	1	3	0	2	5	1	8	1	3	1	0	3	0	3	2	5	0	3
ENSG00000088386	0	0	0	0	0	0	0	0	3	0	1	0	0	0	1	0	1	1	1	0	1	1	1	1	0	0	0	1	1	0	0	0	0	1	0	0	0	1	0	1	1	1	1	1	1	1	1	1
ENSG00000088387	0	0	0	0	0	1	0	0	0	1	0	1	0	0	0	0	0	0	0	0	0	0	0	3	0	0	0	0	0	0	1	0	0	0	0	0	1	0	0	1	0	0	0	0	0	0	0	0
ENSG00000088448	333	340	342	319	273	269	316	249	322	320	340	327	301	235	279	285	297	313	309	297	275	294	256	256	320	309	316	298	302	322	312	319	294	240	258	280	255	240	252	230	299	305	312	278	317	293	311	264
ENSG00000088451	84	93	74	91	71	56	68	68	49	51	43	58	60	55	53	46	46	56	48	58	69	58	51	54	56	59	59	60	62	56	73	50	73	64	73	63	56	57	74	58	64	71	71	67	47	70	64	58
ENSG00000088538	7	2	4	1	2	1	6	0	8	1	1	3	1	3	2	4	1	4	5	1	1	1	1	4	3	2	0	4	1	2	1	5	3	3	7	5	3	3	2	3	3	2	4	2	3	1	1	3
ENSG00000088543	0	3	3	2	1	2	3	2	1	1	2	3	2	1	5	3	3	0	5	1	5	4	3	5	1	4	4	0	4	0	4	2	3	2	3	0	2	5	2	4	5	3	3	3	5	1	3	4
ENSG00000088682	63	74	96	55	84	74	82	58	111	88	89	90	90	96	104	112	87	80	101	90	70	75	90	85	101	99	97	86	101	82	106	69	61	74	71	70	77	75	84	69	76	77	79	77	93	93	107	96
ENSG00000088726	0	0	0	0	0	0	0	0	0	0	0	0	0	0	0	0	0	0	0	0	0	0	0	0	0	0	0	0	0	0	0	0	0	0	0	0	0	0	0	0	0	1	0	0	0	0	0	0
ENSG00000088727	10	14	21	22	10	8	13	14	15	11	15	18	14	18	16	18	11	14	12	25	14	13	17	8	19	12	17	12	24	12	18	15	17	20	18	14	7	4	10	10	12	16	11	9	21	18	15	14
ENSG00000088756	1	0	0	0	0	0	0	0	0	0	0	0	0	0	0	0	0	0	1	0	0	0	0	0	0	1	1	0	0	0	0	0	0	0	0	0	0	0	0	0	0	0	0	0	0	0	0	1
ENSG00000088766	142	131	125	149	108	81	110	83	96	77	91	106	120	103	94	104	82	83	67	80	94	73	96	104	93	68	85	89	113	112	109	103	123	123	106	129	111	102	74	78	100	103	81	88	89	97	103	89
ENSG00000088782	0	0	0	0	0	0	0	0	0	0	0	0	0	0	0	0	0	0	0	0	0	0	0	0	0	0	0	0	0	0	0	0	0	0	0	0	0	0	0	0	0	0	0	0	0	0	0	0
ENSG00000088808	4	4	5	11	6	8	11	13	5	11	12	20	12	12	11	11	11	11	6	8	13	15	11	17	11	10	8	4	13	7	10	12	7	10	8	9	12	9	8	20	10	10	12	9	12	8	11	7
ENSG00000088812	163	139	134	142	154	125	134	142	155	104	134	126	142	131	127	133	151	136	150	139	141	111	113	118	139	134	132	127	136	115	108	135	131	137	116	148	127	123	116	132	136	158	128	124	121	124	126	125
ENSG00000088826	9	7	15	10	9	11	10	14	29	18	11	14	13	19	21	16	23	21	25	29	16	13	14	15	23	15	21	25	12	17	21	17	16	19	14	11	11	17	12	14	19	17	21	22	11	21	15	18
ENSG00000088827	0	0	0	0	0	0	0	0	0	0	0	0	0	0	0	0	0	0	0	1	0	0	0	0	0	0	0	0	0	0	0	0	0	0	0	0	0	0	0	0	0	0	0	0	0	0	0	0
ENSG00000088832	286	294	281	299	270	258	254	255	273	247	279	267	286	278	306	315	297	272	244	260	272	263	266	262	219	226	266	257	303	313	306	328	282	267	286	305	267	239	268	226	269	238	256	243	265	268	294	297
ENSG00000088833	78	66	81	87	78	70	80	93	105	107	95	92	103	108	106	92	112	95	96	84	79	86	113	83	71	100	83	96	91	96	110	95	106	72	75	74	79	86	87	60	86	84	81	62	124	111	121	110
ENSG00000088836	4	5	5	2	4	8	3	5	8	7	2	4	6	2	7	5	5	3	10	1	4	5	3	3	5	2	2	5	5	5	5	8	5	4	6	5	9	1	2	3	2	2	3	4	4	6	7	5
ENSG00000088854	90	76	93	92	104	84	90	102	81	97	68	80	81	87	95	83	93	66	86	83	99	100	102	105	101	74	87	83	84	80	74	57	74	71	74	82	91	102	82	88	87	81	88	75	93	87	86	82
ENSG00000088876	67	62	61	54	64	53	58	60	55	63	52	50	54	48	65	54	85	53	62	80	52	53	46	44	52	51	63	51	47	61	47	58	72	55	54	67	51	35	49	44	50	50	46	57	55	56	44	51
ENSG00000088881	10	7	2	7	16	15	10	9	14	11	12	10	9	6	8	9	6	14	11	15	21	13	13	9	8	8	12	8	10	7	8	10	6	6	8	8	7	14	16	11	14	7	7	9	11	11	8	7
ENSG00000088882	302	327	320	296	344	345	373	367	589	549	594	577	567	492	499	495	538	527	533	521	490	433	487	454	516	495	535	548	481	449	479	495	404	434	441	413	452	404	465	447	447	447	473	460	515	491	536	507
ENSG00000088888	577	571	657	638	582	559	550	509	653	642	681	615	634	590	613	571	711	759	731	678	525	527	559	536	674	683	709	659	592	611	674	597	680	640	684	661	582	553	553	561	658	595	630	633	656	643	639	586
ENSG00000088899	1	1	1	4	4	1	5	3	2	6	9	2	0	6	4	2	6	3	3	2	3	4	1	3	4	3	6	3	5	1	2	3	4	3	3	2	3	3	2	5	1	5	5	3	2	2	2	5
ENSG00000088926	0	0	0	0	0	0	0	0	0	0	0	0	0	0	0	0	0	0	0	0	0	0	0	0	0	0	0	0	0	0	0	0	0	0	0	0	0	0	0	0	0	0	0	0	0	0	0	0
ENSG00000088930	513	454	510	426	393	394	363	361	337	338	340	318	395	342	372	390	368	385	347	349	409	347	394	351	339	327	335	355	429	398	411	415	369	388	373	405	368	391	418	360	364	353	347	324	407	417	381	398
ENSG00000088970	53	54	57	50	41	31	39	44	51	50	53	58	55	41	49	39	66	38	65	45	42	40	45	35	69	65	60	60	47	39	42	46	63	70	56	52	31	42	37	42	57	57	66	65	40	49	45	47
ENSG00000088986	311	273	281	293	261	227	243	234	277	234	235	246	293	240	268	264	299	267	282	270	231	233	217	232	211	238	228	216	238	203	239	227	268	269	276	219	208	193	243	253	207	215	236	221	266	249	294	267
ENSG00000088992	3	3	5	5	7	14	9	4	11	7	12	13	14	8	13	8	12	7	12	9	14	9	16	15	12	12	5	6	10	8	15	10	9	5	6	6	18	3	15	11	12	10	9	2	14	10	13	16
ENSG00000089006	525	505	521	485	488	462	478	446	415	381	376	381	419	395	440	437	413	437	399	397	552	419	450	462	384	378	410	384	507	450	529	439	486	471	473	485	495	479	479	433	401	393	425	390	479	421	442	432
ENSG00000089009	2048	1957	2062	2034	1699	1722	1651	1613	1890	1828	1931	1811	2167	1865	2103	2009	1967	1877	1909	1827	1746	1706	1787	1639	1882	1805	1791	1702	1918	1845	1923	1927	1807	1818	1830	1827	1695	1548	1622	1589	1714	1633	1780	1721	2004	1903	1991	1908
ENSG00000089012	0	0	0	0	0	0	0	0	0	0	0	0	0	0	0	0	0	0	0	0	2	0	0	0	0	0	0	0	0	0	0	0	0	0	0	0	0	0	0	0	0	0	0	0	0	0	0	0
ENSG00000089022	171	167	150	133	141	145	118	123	139	135	142	129	137	122	133	134	183	125	147	131	121	109	135	98	153	123	147	142	160	143	163	137	118	143	120	115	131	119	133	127	120	106	126	108	157	157	153	160
ENSG00000089041	66	80	72	76	70	79	83	65	92	61	79	94	72	67	49	66	88	67	85	99	79	71	79	68	108	91	97	92	71	58	66	70	91	58	67	69	71	67	63	62	66	66	80	80	70	76	62	69
ENSG00000089048	139	131	132	148	72	74	80	67	93	99	98	101	81	57	76	55	95	92	105	84	81	72	104	78	91	72	82	72	50	59	73	73	138	107	101	145	124	111	107	82	82	93	92	82	80	88	78	90
ENSG00000089050	47	44	54	52	56	41	49	61	56	47	43	55	34	53	43	49	43	41	41	45	49	43	62	56	58	45	53	48	46	70	43	45	62	49	47	47	44	42	49	50	58	38	49	52	53	48	42	43
ENSG00000089053	773	665	684	732	579	617	610	567	709	719	742	750	739	731	782	726	786	718	772	716	651	622	704	627	793	735	765	715	784	749	788	737	775	735	746	742	634	595	637	633	697	644	640	653	784	671	765	700
ENSG00000089057	165	181	176	174	198	151	170	152	174	178	196	187	148	146	160	166	202	200	203	190	192	149	171	180	192	159	200	179	155	163	159	171	197	157	202	194	199	163	184	171	167	177	159	191	190	169	165	165
ENSG00000089060	43	39	37	40	46	45	42	58	50	75	61	56	62	57	45	40	82	75	69	70	61	53	54	58	56	69	81	79	57	42	64	68	63	76	49	46	58	47	55	59	68	59	57	68	55	51	53	60
ENSG00000089063	238	221	280	237	185	173	211	169	204	169	194	164	203	175	184	182	177	152	177	176	212	193	183	175	190	179	200	168	196	220	205	209	203	226	225	234	191	203	201	176	178	153	199	181	178	210	198	223
ENSG00000089091	11	12	17	13	13	12	12	12	12	13	16	16	9	14	15	21	9	11	12	8	16	20	10	18	15	18	15	16	9	10	20	15	12	18	14	13	7	15	12	15	15	16	22	18	10	14	15	18
ENSG00000089094	338	286	335	358	311	322	302	277	442	419	434	435	370	373	385	371	394	409	450	416	315	331	364	312	380	390	398	397	366	386	384	422	330	366	385	378	341	296	337	322	347	343	377	329	395	365	386	368
ENSG00000089101	0	0	0	0	3	0	0	0	0	0	0	0	2	0	1	0	1	1	2	0	0	0	0	0	0	0	0	0	0	0	1	0	0	0	0	0	0	0	0	1	0	0	0	2	0	0	0	0
ENSG00000089116	0	0	0	0	0	0	0	0	0	0	0	0	0	0	0	0	0	0	0	0	0	0	0	0	0	0	0	0	0	0	0	0	0	0	0	0	0	0	0	1	0	0	0	0	0	0	0	0
ENSG00000089123	35	40	47	29	35	30	23	36	35	37	35	37	32	30	35	29	30	37	36	25	42	36	33	26	39	30	29	29	33	43	48	33	28	33	28	30	26	25	24	33	26	31	29	34	37	39	30	39
ENSG00000089127	24	13	17	15	31	36	39	35	34	18	18	21	20	33	31	29	29	33	27	36	40	27	33	20	30	23	39	30	28	22	26	27	31	18	19	18	32	37	31	30	29	29	34	25	25	24	25	28
ENSG00000089154	558	563	630	545	487	468	559	468	816	856	885	845	765	721	745	665	965	869	850	836	637	587	623	613	771	685	752	677	717	728	694	693	664	667	684	707	638	560	616	567	659	583	663	656	762	741	788	729
ENSG00000089157	4709	4643	4876	4695	4529	4247	4461	4253	7663	7228	7529	7241	8274	8056	8381	8100	7233	6783	7310	6766	5751	5571	5798	5540	6793	6358	6721	6478	7126	6755	7112	6843	5320	5138	5272	5210	4866	4690	4783	4677	6075	5857	6052	6112	7887	7478	7739	7480
ENSG00000089159	21	22	15	25	14	14	15	8	32	20	27	37	27	25	15	20	26	43	36	29	19	19	21	16	32	21	31	34	20	28	28	15	19	27	27	20	11	15	9	17	22	25	28	16	21	17	27	18
ENSG00000089163	3	5	1	1	2	5	4	3	3	5	5	3	8	4	5	2	7	5	2	4	2	2	0	9	1	3	2	3	5	6	3	2	1	3	4	0	6	4	3	1	4	2	1	3	2	7	1	5
ENSG00000089169	0	0	0	0	0	0	0	0	0	0	0	0	0	0	0	0	0	0	0	0	0	0	0	0	0	0	0	0	0	0	0	0	0	0	0	0	0	0	0	0	0	0	0	0	0	0	0	0
ENSG00000089177	82	72	68	75	114	117	136	97	65	66	77	79	88	86	83	97	74	77	61	65	110	108	134	105	73	88	76	70	72	85	78	93	91	83	78	86	130	99	106	99	73	68	83	69	94	74	105	100
ENSG00000089195	95	61	73	71	77	60	53	57	46	59	65	62	48	65	51	57	70	53	54	66	67	61	63	60	62	62	45	46	67	61	53	65	73	76	83	65	61	69	64	67	50	47	46	56	54	52	59	61
ENSG00000089199	1	0	1	0	0	0	0	0	0	0	0	1	0	0	0	0	0	0	0	1	1	0	0	0	0	1	0	0	0	0	0	0	0	0	0	0	0	0	0	0	0	0	0	0	0	0	0	1
ENSG00000089220	711	687	721	672	615	626	668	677	787	814	792	802	851	838	896	905	864	801	765	793	767	692	801	697	736	633	676	650	884	820	865	826	714	715	779	724	711	688	694	702	661	623	669	627	859	836	889	903
ENSG00000089225	0	0	0	0	0	0	0	0	0	0	0	0	0	0	0	0	0	0	0	0	0	0	0	0	0	0	0	0	0	0	0	0	0	0	0	0	0	0	0	0	0	0	0	0	0	0	0	0
ENSG00000089234	128	93	107	99	89	78	78	100	93	91	89	93	86	79	97	95	90	92	95	83	91	83	81	84	105	88	82	84	113	101	93	97	104	96	101	95	90	84	98	107	100	89	96	103	87	101	83	93
ENSG00000089248	274	264	295	284	265	245	250	261	402	376	392	344	371	346	358	335	390	352	405	400	313	227	264	253	382	369	399	344	318	308	309	284	297	330	328	305	251	254	235	211	311	337	319	325	355	293	313	308
ENSG00000089250	0	0	1	0	0	0	1	0	1	0	0	0	0	1	0	0	1	2	0	0	2	0	1	2	1	0	1	0	0	0	0	2	0	0	1	0	0	0	1	1	0	0	0	1	0	2	0	0
ENSG00000089280	1889	1910	1999	1836	1248	1240	1247	1190	1855	1814	1910	1785	1541	1382	1511	1396	1991	1848	1974	1882	1302	1238	1253	1264	1697	1759	1687	1654	1470	1424	1506	1434	1687	1683	1691	1656	1271	1173	1235	1246	1646	1496	1557	1457	1494	1550	1506	1575
ENSG00000089289	131	124	123	120	116	124	110	117	159	146	170	139	154	122	149	138	137	124	155	155	125	108	127	117	149	136	154	151	138	134	144	102	132	124	117	119	96	95	122	110	123	125	130	114	140	122	139	127
ENSG00000089327	140	153	157	133	182	192	197	170	298	244	295	244	266	262	262	239	254	273	234	264	236	213	250	229	261	249	286	240	250	250	244	235	190	216	180	171	183	216	201	182	214	197	180	206	249	284	237	230
ENSG00000089335	167	159	156	134	124	111	134	116	113	115	114	100	105	115	117	123	128	115	112	118	123	132	126	124	134	110	112	109	121	128	99	119	139	141	129	128	101	115	103	93	132	136	127	121	101	110	131	114
ENSG00000089351	197	216	217	166	167	131	155	159	400	379	407	403	333	340	324	301	447	347	346	372	229	208	231	194	343	290	334	304	282	259	273	281	291	261	294	246	193	197	175	202	282	290	299	305	317	255	287	270
ENSG00000089356	1	0	0	0	0	0	0	0	0	0	0	0	0	0	1	0	0	0	0	0	0	0	0	1	0	0	0	1	0	0	0	0	0	0	0	0	0	0	0	0	1	0	0	0	0	0	0	0
ENSG00000089472	0	1	0	0	0	0	0	0	1	0	0	0	0	0	0	0	0	0	0	0	0	0	0	0	0	0	0	0	0	0	0	0	0	0	0	0	1	0	0	0	0	0	0	0	0	0	0	0
ENSG00000089486	28	29	53	28	38	29	46	29	57	43	55	44	50	42	57	44	54	46	53	61	42	49	42	34	54	40	42	39	38	47	43	46	44	41	30	28	54	51	53	42	50	44	47	35	54	46	43	51
ENSG00000089505	9	6	3	6	8	10	9	7	12	10	8	13	7	9	6	5	9	9	13	18	5	12	14	5	11	5	8	14	5	9	3	6	0	8	8	11	6	7	10	7	8	5	8	7	9	13	10	16
ENSG00000089558	1	1	4	1	5	3	5	3	4	5	3	3	4	0	2	5	7	3	3	7	2	2	5	3	6	6	1	9	5	0	1	3	3	0	2	2	3	6	4	5	4	3	3	2	7	3	0	3
ENSG00000089597	1147	1088	1184	1111	1046	1021	1076	978	1444	1463	1437	1369	1458	1381	1452	1359	1409	1392	1438	1356	1165	1119	1225	1087	1364	1305	1439	1387	1308	1239	1352	1264	1118	1153	1123	1106	1057	1062	1075	1006	1252	1138	1211	1221	1445	1396	1392	1329
ENSG00000089639	137	110	128	116	126	119	123	124	214	268	221	246	214	168	204	192	211	212	250	232	187	181	189	189	223	232	210	190	188	192	199	188	163	156	175	171	175	172	183	161	206	191	225	181	203	173	215	222
ENSG00000089682	47	41	36	46	33	37	54	27	32	48	33	31	37	39	29	28	42	38	49	39	46	50	42	39	27	41	48	51	48	50	48	41	40	45	36	36	53	35	45	40	37	24	29	36	39	39	27	54
ENSG00000089685	309	286	296	250	258	249	241	246	323	293	313	312	350	314	330	364	317	307	318	322	286	240	261	234	297	274	314	282	317	318	328	355	303	262	293	307	276	259	259	252	295	300	269	268	378	335	311	358
ENSG00000089692	0	0	0	0	0	0	0	0	0	0	0	0	0	0	0	0	0	0	0	0	0	0	0	0	0	0	0	0	0	0	0	0	0	0	0	0	0	0	0	0	0	0	0	0	0	0	0	0
ENSG00000089693	181	170	169	166	164	158	182	156	275	270	270	281	254	223	264	260	290	266	271	252	208	211	227	218	235	245	245	295	257	222	251	236	206	174	203	217	220	202	212	219	217	241	231	208	259	239	229	274
ENSG00000089723	3	5	3	3	5	6	3	6	7	5	2	3	7	2	6	3	6	3	8	2	3	4	3	6	3	7	8	5	6	6	5	2	2	3	8	3	4	9	4	5	5	5	0	3	5	5	3	4
ENSG00000089737	388	385	448	405	387	391	419	369	395	340	393	395	492	451	461	451	439	411	391	421	440	407	466	386	384	380	405	369	411	398	488	397	383	386	343	337	401	380	379	407	371	344	381	340	428	437	461	442
ENSG00000089775	145	134	140	117	135	113	115	129	113	120	94	117	100	107	103	94	109	89	106	95	124	123	115	113	121	129	117	109	107	101	118	94	116	105	113	102	109	77	109	100	117	141	112	103	103	98	117	98
ENSG00000089818	67	72	70	90	64	72	68	81	49	63	64	54	66	49	67	77	73	65	61	55	79	65	56	78	56	55	68	60	70	61	68	49	73	64	77	73	62	59	75	64	66	62	69	67	68	53	65	71
ENSG00000089820	273	274	260	250	254	254	281	248	524	482	524	497	511	471	531	483	498	467	578	516	360	355	366	334	421	406	444	378	422	444	490	451	360	324	287	325	331	316	309	323	384	365	412	402	494	482	501	488
ENSG00000089847	1	0	0	1	1	1	1	1	1	1	0	1	0	4	3	0	1	3	2	1	4	2	1	2	0	1	1	1	4	1	2	0	2	0	0	0	1	3	0	0	2	0	2	1	2	3	0	0
ENSG00000089876	19	27	20	21	24	17	18	26	28	16	15	16	19	21	21	19	18	19	22	23	22	18	25	31	33	29	24	21	35	22	26	21	22	16	21	23	19	15	23	16	22	15	21	28	30	24	34	26
ENSG00000089902	389	345	409	351	359	304	347	358	303	275	301	243	317	264	294	259	275	259	300	265	326	293	342	339	327	275	312	270	326	302	307	302	310	285	307	320	326	308	300	321	268	265	266	277	288	278	322	310
ENSG00000089916	334	267	300	264	350	335	339	313	297	277	297	229	270	268	330	284	265	291	289	284	313	324	327	313	358	344	304	328	293	289	290	280	266	246	233	242	293	259	301	252	286	273	265	301	290	277	279	270
ENSG00000090006	178	175	178	151	183	173	207	179	418	365	400	390	240	249	254	223	329	347	351	392	285	252	281	282	358	362	388	369	230	230	257	223	265	231	247	240	226	207	249	227	314	314	278	310	261	251	266	233
ENSG00000090013	23	16	32	18	33	31	32	31	55	46	64	54	66	40	66	53	50	39	40	38	47	41	46	40	53	37	35	66	37	45	51	31	18	27	33	38	39	32	26	32	48	39	28	36	58	50	44	58
ENSG00000090020	47	45	40	43	43	56	40	38	66	62	69	77	52	41	49	65	59	55	78	99	52	43	50	52	70	62	64	88	51	78	68	52	49	65	53	71	51	44	52	37	54	48	49	62	46	58	58	50
ENSG00000090054	131	97	144	122	131	115	122	111	94	110	115	103	109	123	135	113	129	84	121	109	132	122	111	122	99	125	116	97	142	121	113	127	104	98	99	120	126	109	118	116	98	103	109	81	125	121	117	120
ENSG00000090060	1169	1139	1269	1156	953	938	981	919	893	760	812	820	924	875	906	862	896	826	801	846	883	877	891	904	947	936	902	890	1118	956	1087	1008	1101	1069	1026	989	885	875	879	896	971	881	897	890	956	982	988	986
ENSG00000090061	73	80	76	73	57	52	63	50	55	63	74	51	54	40	55	56	57	55	72	61	42	55	42	44	61	57	63	53	53	43	57	53	72	70	57	68	54	50	63	61	58	70	51	75	49	43	60	54
ENSG00000090097	13	6	14	6	7	16	12	7	27	24	23	22	15	16	29	22	23	22	17	15	15	18	17	23	21	25	25	21	19	18	13	19	12	14	13	16	13	7	19	16	22	16	15	14	21	15	18	12
ENSG00000090104	7	5	11	6	5	17	11	12	9	8	8	9	20	9	7	5	8	10	10	6	17	12	11	14	5	6	9	14	12	13	13	9	7	14	6	4	8	13	11	6	13	6	5	17	22	9	13	16
ENSG00000090238	61	56	66	41	62	64	71	60	138	127	113	133	94	75	74	73	104	107	99	108	93	80	81	104	117	129	124	119	98	89	106	89	80	67	70	68	84	49	86	87	134	95	116	113	86	85	71	83
ENSG00000090263	40	39	45	45	38	41	38	37	33	30	28	39	48	48	52	47	41	47	41	25	32	44	41	43	45	32	37	32	47	44	29	32	43	35	34	42	35	35	32	40	29	43	30	33	44	43	36	38
ENSG00000090266	116	124	125	110	92	92	90	78	146	91	135	112	136	155	155	139	139	128	126	97	107	98	120	95	108	119	99	109	121	118	128	107	125	121	112	116	84	80	112	100	113	97	97	112	137	117	151	118
ENSG00000090273	293	264	271	277	198	208	237	213	361	294	337	303	387	326	334	313	392	349	349	350	248	231	259	265	323	278	302	328	289	309	308	318	289	320	313	291	280	220	239	245	300	245	255	233	332	341	342	322
ENSG00000090316	144	123	151	162	138	142	137	126	219	204	219	206	209	200	217	177	236	186	231	224	162	150	144	152	204	177	218	193	197	179	207	197	194	162	173	182	151	158	167	178	177	156	197	162	218	213	205	200
ENSG00000090339	26	18	20	21	32	20	22	30	26	23	33	30	34	22	39	32	33	28	29	28	35	30	35	36	31	35	45	25	28	36	25	31	22	18	16	11	32	28	29	39	28	20	23	22	36	31	33	31
ENSG00000090372	163	181	179	152	157	171	168	172	239	298	344	276	288	259	307	260	280	298	314	278	206	190	222	234	271	277	277	279	255	240	279	264	196	234	229	207	214	187	219	223	234	256	230	241	298	301	300	285
ENSG00000090376	228	200	221	203	230	212	231	238	164	155	173	141	183	145	160	154	157	147	177	161	232	216	225	211	177	167	169	175	171	184	171	211	180	184	183	176	173	189	171	204	187	155	180	151	206	192	154	155
ENSG00000090382	2	1	1	2	9	6	11	12	3	0	1	1	1	0	4	2	1	0	1	2	3	10	8	9	0	4	0	3	6	2	2	0	0	4	1	3	13	10	11	4	1	3	0	2	4	0	1	4
ENSG00000090402	0	0	0	0	0	0	0	0	0	0	0	0	0	0	0	0	0	0	0	0	0	0	0	0	0	0	0	0	0	0	0	0	0	0	0	0	0	0	0	0	0	0	0	0	0	0	0	0
ENSG00000090432	12	14	15	16	21	16	12	13	31	33	31	20	24	21	24	26	20	26	28	30	21	17	19	19	21	18	33	29	22	18	26	29	26	26	28	23	24	21	22	18	32	27	23	26	19	25	31	34
ENSG00000090447	109	124	134	150	97	100	101	96	204	205	182	198	164	172	165	144	193	194	178	190	107	105	118	99	174	130	177	172	149	140	156	157	184	164	170	175	108	109	84	105	170	138	146	164	173	158	151	143
ENSG00000090470	200	204	242	209	173	157	180	173	179	166	208	153	161	165	170	166	187	163	187	174	204	164	178	165	172	176	172	160	201	205	207	196	207	197	214	207	142	132	153	167	185	184	158	176	164	160	169	163
ENSG00000090487	147	166	154	134	144	113	105	134	122	140	135	105	143	118	107	126	154	131	151	142	122	123	109	111	149	116	158	113	140	130	126	146	152	141	149	178	136	115	119	114	132	122	131	130	129	137	116	127
ENSG00000090512	0	0	0	0	0	0	0	0	0	0	0	0	0	0	0	0	0	0	0	0	0	0	0	0	0	0	0	0	0	0	0	0	0	0	0	0	0	0	0	0	0	0	0	0	0	0	0	0
ENSG00000090520	147	142	142	161	102	117	107	113	100	101	94	105	85	101	97	103	112	120	107	113	107	96	102	115	120	91	116	112	115	109	115	105	150	138	122	135	128	110	114	121	106	99	93	79	112	108	117	93
ENSG00000090530	0	0	0	0	0	0	0	0	0	0	0	0	0	0	0	0	0	0	0	0	0	0	0	0	0	0	0	0	0	0	0	0	0	0	0	0	0	0	0	0	0	0	0	0	0	0	0	0
ENSG00000090534	0	0	1	0	0	0	0	0	0	0	0	0	0	0	0	0	0	0	0	0	0	0	2	0	0	0	1	0	0	1	0	0	0	0	0	0	0	0	0	0	0	0	0	0	1	0	0	0
ENSG00000090539	0	0	0	0	0	0	0	0	0	0	0	0	0	0	0	0	0	0	0	0	0	0	0	0	0	0	0	1	1	0	0	0	1	0	0	0	0	0	0	0	0	1	0	0	0	0	0	0
ENSG00000090554	3	2	2	0	2	2	0	1	1	0	3	5	2	1	1	1	2	2	3	0	1	3	2	2	3	0	0	2	0	1	2	3	3	2	1	0	4	1	0	2	1	0	4	2	2	2	5	0
ENSG00000090565	141	144	144	130	147	139	118	121	251	210	201	235	203	157	195	201	222	231	235	244	179	160	175	174	233	193	242	262	203	201	191	180	165	180	180	167	160	149	180	167	203	167	197	194	180	197	213	200
ENSG00000090581	40	44	34	36	40	36	36	34	68	63	81	63	66	69	69	59	62	62	80	50	68	39	67	52	72	70	60	62	57	47	72	74	60	43	49	59	50	45	55	54	50	50	55	59	77	60	70	71
ENSG00000090612	42	38	33	37	38	37	37	43	36	25	36	30	37	35	39	32	25	33	33	35	31	43	45	36	34	28	34	36	33	45	29	33	34	37	31	28	28	33	40	41	23	31	26	25	35	29	41	36
ENSG00000090615	339	302	333	300	292	265	321	281	432	352	384	404	343	339	346	348	453	443	419	397	301	348	312	327	399	395	424	394	368	384	362	339	385	396	410	391	318	338	318	308	404	343	385	345	374	356	379	396
ENSG00000090621	933	921	960	931	800	768	803	788	1019	1022	916	932	945	846	945	860	1057	1003	1046	1022	858	791	824	795	911	858	942	878	934	890	1005	887	994	989	1047	994	888	807	899	795	974	920	936	935	916	895	952	927
ENSG00000090659	0	0	0	0	0	0	0	0	0	0	0	0	0	0	0	0	0	0	0	0	0	0	0	1	0	0	0	1	0	0	0	0	0	0	0	0	0	0	0	0	0	0	0	0	0	0	0	0
ENSG00000090661	12	13	16	10	12	16	5	14	18	16	16	11	5	10	12	11	13	25	20	20	13	8	13	13	17	18	15	17	6	12	11	10	16	11	14	13	9	6	12	7	13	14	11	10	14	12	11	14
ENSG00000090674	19	13	18	12	16	15	18	10	32	22	25	24	18	16	25	26	23	25	26	29	20	18	25	10	21	26	22	25	22	21	28	23	22	15	26	17	28	27	21	26	14	16	17	19	20	28	21	22
ENSG00000090686	421	404	396	386	345	370	358	368	342	285	322	302	270	278	286	305	319	270	312	271	340	344	327	315	315	311	381	303	338	330	316	326	315	324	311	318	316	278	356	329	315	327	355	317	272	325	330	312
ENSG00000090776	9	16	16	21	18	9	13	13	16	25	16	23	20	12	18	17	18	11	14	23	23	17	28	24	16	16	18	15	20	13	13	16	11	14	14	19	29	24	23	15	14	11	18	17	12	18	15	14
ENSG00000090857	197	192	234	202	231	192	235	173	233	250	266	221	220	224	247	213	257	214	247	258	241	173	236	201	262	226	260	258	217	186	210	220	239	241	261	227	212	207	213	226	248	214	223	226	242	203	215	190
ENSG00000090861	674	668	747	671	524	527	523	481	838	840	847	844	686	625	644	667	909	806	894	868	585	563	566	599	759	735	722	731	693	606	661	604	763	698	786	761	502	506	508	522	758	721	765	693	672	642	700	667
ENSG00000090863	939	826	895	821	1249	1299	1296	1228	995	1077	1001	1017	1071	1084	1121	1066	1031	983	1023	1078	1225	1264	1204	1243	1099	983	1123	1075	1101	1043	1121	972	901	852	882	876	1235	1183	1207	1251	975	901	1005	968	1153	972	1167	1095
ENSG00000090889	225	213	241	216	191	173	226	185	202	158	203	180	205	176	229	213	205	203	197	225	189	185	188	165	191	192	189	196	202	198	222	227	192	200	200	171	194	180	192	193	178	188	174	182	203	232	196	185
ENSG00000090905	304	269	292	268	243	252	242	240	249	239	251	265	227	232	256	235	289	269	293	259	258	234	232	246	285	231	276	226	243	231	250	238	266	256	258	261	238	220	255	218	248	230	230	268	292	264	246	257
ENSG00000090924	269	225	259	230	268	259	229	241	328	335	366	343	285	244	271	274	335	305	322	332	333	292	261	286	342	332	324	336	267	267	310	326	284	293	304	286	279	272	284	297	273	274	262	254	312	242	309	300
ENSG00000090932	27	27	25	28	18	24	29	25	59	61	77	73	32	29	38	40	62	48	47	56	30	38	29	22	42	37	31	36	29	38	46	47	57	58	54	45	36	19	39	34	44	48	47	47	28	28	35	23
ENSG00000090971	29	28	25	27	29	29	29	32	51	56	49	43	56	77	38	44	43	56	60	38	47	40	32	36	34	42	32	39	39	45	32	36	51	39	37	33	33	37	29	31	34	32	32	46	51	50	40	47
ENSG00000090975	455	434	457	484	294	305	307	302	775	730	788	783	582	525	557	522	785	708	747	731	392	398	380	384	719	700	727	717	574	502	551	523	569	515	543	559	376	330	364	356	579	566	598	591	565	507	528	578
ENSG00000090989	124	104	115	101	141	127	122	94	94	92	104	86	97	91	116	96	102	105	80	101	100	95	110	100	90	93	97	87	123	116	133	136	108	118	134	82	106	110	105	103	116	96	82	100	123	127	92	122
ENSG00000091009	83	87	97	91	75	69	80	85	44	62	59	44	65	59	62	66	64	55	43	46	63	70	61	68	44	47	56	48	88	83	71	77	82	83	105	78	60	65	74	72	57	73	57	59	64	52	57	47
ENSG00000091010	0	1	0	0	0	0	0	0	0	0	1	0	0	0	0	0	0	0	1	1	0	0	1	0	1	0	0	0	0	2	0	0	0	0	0	0	0	0	0	0	0	0	0	0	0	0	0	0
ENSG00000091039	493	458	516	503	515	446	523	477	370	350	334	355	386	365	391	338	316	309	328	331	503	482	509	491	343	319	352	340	487	457	443	458	448	443	451	425	476	433	496	484	360	344	330	329	368	408	415	409
ENSG00000091073	52	53	48	47	32	56	44	49	81	76	105	79	52	71	73	85	107	90	89	80	58	68	63	61	78	70	92	86	62	68	81	69	68	75	57	73	75	65	57	68	67	75	66	56	81	77	72	70
ENSG00000091106	0	2	0	1	1	2	0	0	0	1	3	1	1	1	0	1	1	1	3	0	2	0	2	1	1	0	0	0	2	1	1	0	0	3	2	0	0	2	0	2	0	0	0	1	0	1	0	0
ENSG00000091127	347	312	332	327	256	247	266	237	229	260	247	246	256	213	224	206	241	214	260	225	226	255	245	235	262	233	221	244	290	254	254	257	319	285	264	303	227	243	248	237	217	256	230	227	268	245	274	246
ENSG00000091128	1	1	0	3	4	2	3	0	1	2	0	0	3	1	2	3	1	1	3	1	2	3	3	2	2	1	2	3	1	1	1	1	0	0	1	1	1	3	5	5	0	0	2	2	1	1	1	1
ENSG00000091129	0	0	0	0	0	0	0	0	1	0	0	0	2	2	0	0	0	0	0	1	0	0	0	1	0	0	1	0	0	0	0	0	1	0	1	0	0	2	1	1	0	0	0	1	1	0	0	0
ENSG00000091136	5	1	3	2	3	7	2	7	4	6	3	6	3	2	3	4	0	4	0	3	3	3	6	2	2	3	4	4	6	4	5	0	2	3	5	7	8	2	3	7	3	3	2	1	3	3	6	0
ENSG00000091137	2	3	2	4	3	2	2	2	0	0	2	4	2	3	3	3	3	4	2	5	4	1	5	1	1	1	2	6	2	2	1	1	1	2	0	1	2	1	2	0	2	1	6	4	0	1	1	0
ENSG00000091138	0	0	0	2	0	0	0	0	0	0	0	0	0	0	0	0	0	0	0	0	0	0	0	0	0	0	0	0	1	0	1	0	0	0	1	0	0	0	0	1	0	0	0	0	1	0	0	0
ENSG00000091140	367	365	445	394	301	282	333	309	305	231	262	281	311	290	295	300	285	276	277	263	268	293	312	292	296	280	297	285	301	316	364	301	361	346	329	346	314	295	309	285	295	285	260	269	333	275	328	322
ENSG00000091157	60	55	81	66	65	56	56	63	54	54	51	65	46	44	62	40	49	52	57	43	76	48	72	54	60	48	48	44	55	55	48	50	52	72	60	59	70	58	73	51	61	46	57	46	62	63	54	49
ENSG00000091164	138	161	164	142	123	111	126	120	132	119	126	103	139	120	114	115	133	111	121	113	123	126	139	118	128	122	127	109	148	131	141	134	133	154	155	139	127	93	129	120	134	126	144	129	124	133	126	113
ENSG00000091181	0	2	0	1	1	1	0	2	1	2	0	0	2	1	2	0	0	2	0	0	0	0	1	0	0	0	2	1	1	0	2	0	0	0	0	0	1	0	0	2	0	1	1	1	0	0	1	0
ENSG00000091262	2	2	3	0	0	0	2	2	1	1	0	2	1	0	0	2	0	0	3	0	2	1	0	1	1	0	1	1	0	3	3	0	0	2	0	2	2	2	0	0	4	0	1	0	0	0	0	1
ENSG00000091317	336	338	380	354	314	306	297	304	190	208	203	187	233	222	226	232	215	243	213	206	272	268	275	244	209	214	202	237	314	254	280	260	281	331	326	308	330	289	277	282	246	219	243	252	233	268	245	248
ENSG00000091409	29	24	26	36	46	61	50	51	31	28	25	21	20	26	32	18	25	31	30	23	48	37	64	38	34	24	26	29	30	18	27	30	25	25	30	29	66	53	53	46	30	20	24	22	23	21	22	18
ENSG00000091428	1	2	2	2	1	0	1	2	2	2	6	1	1	4	2	1	5	4	4	1	3	2	0	0	0	2	5	1	3	2	1	4	3	1	2	1	0	0	2	3	1	1	0	3	5	1	3	3
ENSG00000091436	339	264	286	296	271	275	282	235	237	220	197	258	221	238	234	230	242	200	237	229	262	259	273	258	251	249	226	219	256	261	263	270	270	218	227	248	243	213	236	234	239	252	222	223	243	216	221	258
ENSG00000091482	0	0	0	0	0	0	0	0	0	0	0	0	1	0	0	0	0	0	0	0	0	0	0	0	0	0	0	0	0	0	0	0	0	0	0	0	0	0	0	0	0	0	0	0	0	0	0	0
ENSG00000091483	247	238	287	216	178	191	195	199	201	175	210	184	225	206	213	209	206	198	195	205	169	182	152	185	146	148	175	154	223	185	185	212	239	221	233	219	189	187	174	175	176	160	160	190	222	213	213	202
ENSG00000091490	45	39	50	48	48	48	43	48	39	51	41	45	35	34	37	34	45	45	34	29	49	32	36	50	34	36	52	50	42	32	30	37	45	43	41	40	33	44	40	31	38	40	35	28	22	41	28	42
ENSG00000091513	6	7	5	4	11	4	2	4	9	8	10	6	16	9	10	14	10	13	7	7	6	4	6	9	14	7	13	7	5	13	5	8	9	4	4	7	7	3	7	4	9	10	9	10	10	4	6	7
ENSG00000091527	834	807	800	732	570	537	546	468	537	505	571	532	559	540	604	538	579	527	522	504	553	488	568	500	534	522	569	530	612	645	619	651	783	709	698	720	528	564	502	529	557	596	581	581	599	603	627	585
ENSG00000091536	0	1	1	3	0	0	3	3	4	1	5	4	1	0	2	0	1	1	4	2	5	3	2	1	3	3	3	4	2	2	2	2	1	1	1	1	7	1	2	0	2	2	3	2	3	4	1	1
ENSG00000091542	320	308	347	339	287	267	288	243	441	448	429	398	421	405	414	394	377	422	422	409	325	304	361	328	431	435	439	423	338	371	407	401	322	352	353	346	271	293	278	288	409	356	392	366	376	345	374	348
ENSG00000091583	0	0	0	0	0	0	0	0	0	0	0	0	0	0	0	0	0	0	0	0	0	0	0	0	0	0	0	0	0	0	0	0	0	0	0	0	0	0	0	0	0	0	0	0	0	0	0	0
ENSG00000091592	191	181	178	150	158	174	190	153	314	309	305	277	221	204	242	230	309	302	304	287	179	172	191	195	332	332	351	321	215	182	203	175	220	227	194	249	161	158	165	189	277	255	279	270	202	197	221	207
ENSG00000091622	1	2	4	1	5	3	0	2	2	4	1	5	2	5	1	4	6	6	6	7	2	3	2	3	8	2	3	4	1	5	3	2	3	7	4	2	0	1	4	0	4	5	6	4	6	4	1	1
ENSG00000091640	42	53	70	55	65	65	69	63	95	81	82	90	107	93	102	85	88	88	77	93	80	80	96	81	68	72	68	79	91	81	79	86	61	51	66	59	61	72	81	71	70	57	72	67	89	79	102	85
ENSG00000091651	182	147	181	155	168	158	158	164	128	126	149	132	97	123	123	127	150	130	145	139	170	154	169	177	143	123	127	126	127	118	140	106	153	142	160	150	129	146	154	136	104	122	135	112	156	147	113	149
ENSG00000091656	2	0	0	0	1	0	0	1	0	0	2	2	0	0	1	0	0	2	0	1	0	1	0	0	0	0	1	0	1	1	1	0	1	0	0	0	0	2	0	0	0	1	0	0	2	1	2	0
ENSG00000091664	0	0	0	0	0	0	0	0	0	0	0	0	0	0	0	0	0	0	0	0	0	0	0	0	0	0	0	0	0	0	0	0	0	0	0	0	0	0	0	0	0	0	0	0	0	0	0	0
ENSG00000091704	0	0	0	1	0	0	0	0	0	0	0	0	0	0	0	0	0	0	0	0	0	0	0	0	0	0	0	0	0	0	1	0	0	0	0	0	0	0	0	0	0	0	0	0	0	0	0	0
ENSG00000091732	87	99	87	60	63	62	70	53	70	72	69	71	80	76	78	73	82	107	81	62	75	57	56	50	87	68	66	75	70	65	87	83	69	78	82	74	80	70	84	71	60	68	79	70	96	85	77	83
ENSG00000091831	3	7	5	4	4	6	2	4	7	4	4	2	4	3	2	2	1	4	2	3	0	3	5	4	3	9	5	1	5	4	3	2	4	2	5	5	7	6	4	3	3	5	5	3	2	2	0	2
ENSG00000091844	26	10	14	13	10	7	7	11	14	15	11	16	7	9	14	9	11	9	5	14	8	9	8	8	9	12	14	14	5	10	7	9	11	8	6	13	7	4	9	9	11	16	11	6	7	6	6	7
ENSG00000091879	0	0	1	2	1	2	2	1	2	0	0	0	1	0	0	1	0	0	1	1	1	0	2	1	0	1	1	0	0	2	2	1	0	1	0	2	1	1	1	1	0	0	0	1	1	1	1	0
ENSG00000091947	57	68	56	50	61	50	66	54	104	94	80	107	95	100	77	110	89	102	88	91	73	71	66	72	92	83	89	88	76	79	78	84	55	63	72	75	72	67	84	64	69	81	69	69	83	76	97	91
ENSG00000091972	1	0	0	0	3	1	2	1	0	0	0	0	1	1	0	0	1	1	1	0	1	0	0	0	0	0	0	1	1	0	0	0	0	0	0	0	1	1	1	1	0	0	0	1	0	0	0	0
ENSG00000091986	0	0	0	0	0	0	0	0	0	0	0	0	0	0	0	0	0	0	0	0	0	0	0	0	0	0	0	0	0	0	0	0	0	0	0	0	0	0	0	0	0	0	0	0	0	0	0	0
ENSG00000092009	0	0	0	0	1	0	1	0	0	0	0	1	0	0	0	0	0	0	1	1	0	0	4	2	0	0	0	1	0	0	0	0	1	0	1	0	0	0	0	2	0	0	1	0	0	0	0	0
ENSG00000092010	492	526	550	523	429	379	448	391	562	505	554	497	589	548	603	589	546	550	579	562	474	405	417	417	495	511	512	522	559	539	565	516	497	451	506	482	428	445	381	414	503	468	485	454	604	562	598	585
ENSG00000092020	129	133	153	115	100	107	107	95	91	88	84	90	92	90	100	97	91	77	76	96	81	86	96	88	113	86	90	103	111	123	126	99	124	123	157	127	115	84	135	113	92	83	113	106	106	96	103	105
ENSG00000092036	102	130	102	90	113	115	129	110	138	108	105	103	116	105	123	111	130	108	115	90	115	102	120	107	91	104	125	123	120	110	114	96	83	107	103	83	94	80	98	105	119	101	112	114	104	113	97	119
ENSG00000092051	0	0	0	1	1	1	0	0	0	0	0	1	0	0	0	1	0	1	0	2	0	0	1	1	1	1	0	0	0	0	1	0	0	0	0	0	1	0	0	0	0	0	0	1	0	0	0	0
ENSG00000092054	0	0	0	0	0	0	0	0	0	0	0	0	0	0	0	0	0	0	0	0	0	0	0	0	0	0	0	0	0	0	0	0	0	0	0	0	0	0	1	0	0	0	0	0	0	0	0	0
ENSG00000092067	3	9	3	5	6	8	5	3	10	6	8	7	8	7	4	9	9	9	7	6	7	10	13	13	9	7	3	10	7	5	6	6	11	4	9	3	12	14	10	11	4	9	7	8	4	5	1	5
ENSG00000092068	8	10	7	10	22	14	23	22	11	15	7	12	10	10	12	16	15	10	9	16	8	13	20	20	13	16	4	4	17	9	7	10	8	7	9	7	22	20	22	31	7	5	13	9	17	15	16	21
ENSG00000092094	125	115	118	115	128	96	105	94	115	102	103	119	126	108	121	107	117	113	108	108	110	96	103	121	122	126	120	115	138	115	122	107	103	105	106	110	100	107	121	95	112	93	108	109	118	117	135	130
ENSG00000092096	0	0	0	0	0	0	0	0	0	0	0	0	0	0	0	0	0	0	0	0	0	0	0	0	0	0	0	0	0	0	0	0	0	0	0	0	0	0	0	0	0	0	0	0	0	0	0	0
ENSG00000092098	47	46	53	53	47	30	45	40	75	69	62	81	92	65	63	66	89	67	86	78	51	65	60	58	83	74	81	55	73	60	78	58	67	64	63	76	62	57	47	52	61	70	67	63	64	88	83	68
ENSG00000092108	109	111	126	117	86	95	88	83	92	90	88	67	88	91	70	78	83	71	83	70	93	81	88	95	83	92	88	89	96	81	87	101	121	92	105	111	92	87	99	90	86	88	89	82	87	83	82	76
ENSG00000092140	148	123	143	136	88	96	110	96	107	123	90	108	111	103	86	114	88	92	80	107	112	101	126	102	107	99	90	98	113	116	111	105	121	148	117	127	90	87	121	112	90	91	101	95	121	110	94	102
ENSG00000092148	560	554	560	579	562	550	566	516	442	445	448	450	469	472	498	488	457	402	458	438	513	514	483	514	446	423	434	454	536	485	528	488	544	466	511	507	515	463	450	468	444	450	484	419	518	514	508	503
ENSG00000092199	1939	1847	2020	1888	1593	1532	1644	1560	1578	1542	1508	1510	1975	1884	1957	1825	1657	1631	1643	1549	1567	1539	1587	1570	1563	1446	1538	1552	2073	1968	2055	1940	1779	1647	1801	1731	1481	1448	1515	1449	1530	1453	1552	1496	1859	1753	1906	1845
ENSG00000092200	0	1	2	1	1	1	1	2	1	0	0	0	0	1	0	0	2	2	1	1	0	0	0	1	2	3	0	0	1	1	1	0	1	0	1	0	2	0	0	1	0	1	1	0	0	0	2	1
ENSG00000092201	1274	1265	1295	1257	1212	1164	1236	1204	993	997	988	934	1056	1000	1045	998	1063	998	1047	1006	1104	1125	1077	1144	987	910	968	939	1080	1034	1122	1083	1061	1042	1049	1064	1062	980	1033	1017	1024	904	1000	907	1070	1044	1138	1025
ENSG00000092203	220	191	229	183	182	188	207	194	235	249	208	195	230	215	248	192	226	206	236	221	210	210	192	184	230	213	229	216	207	187	231	250	225	204	235	182	186	169	156	191	193	219	207	208	230	221	208	210
ENSG00000092208	62	39	47	55	41	40	49	42	39	35	43	36	32	38	33	44	42	46	35	40	40	27	41	30	37	42	40	38	35	35	34	49	47	31	54	36	38	27	42	34	42	33	45	37	39	45	41	46
ENSG00000092295	7	4	3	6	1	5	5	3	8	10	14	8	4	9	5	3	6	12	3	7	7	2	5	3	7	9	7	5	8	7	4	4	6	3	3	4	11	5	9	5	5	10	3	6	5	9	4	2
ENSG00000092330	107	94	97	93	93	107	82	90	130	138	109	100	124	133	138	128	129	105	143	124	113	95	93	99	131	106	127	129	133	105	129	116	107	108	114	114	88	98	91	93	118	108	105	102	126	99	129	132
ENSG00000092345	0	0	0	2	7	9	11	6	0	1	2	1	3	5	5	4	0	0	0	0	8	6	7	5	0	0	2	0	1	1	3	3	1	1	1	1	9	10	9	8	1	0	0	0	1	3	2	1
ENSG00000092377	0	0	0	0	0	0	0	0	0	0	0	0	0	0	0	0	0	0	0	0	0	0	0	0	0	0	0	0	0	0	0	0	0	0	0	0	0	0	0	0	0	0	0	0	0	0	0	0
ENSG00000092421	2	4	3	3	6	3	4	5	5	8	14	2	7	3	7	5	4	4	6	12	3	4	5	2	2	7	7	4	6	5	4	5	5	1	5	5	3	2	2	1	6	9	10	0	6	4	7	4
ENSG00000092439	551	489	487	479	499	475	516	507	363	372	372	352	399	400	390	414	401	336	368	372	457	418	448	434	451	417	422	397	488	483	519	474	440	460	499	438	456	419	419	431	408	394	435	380	433	437	461	460
ENSG00000092445	80	49	75	70	101	112	103	100	91	87	109	81	78	111	74	98	88	90	93	80	120	104	131	117	65	67	70	72	106	92	96	81	88	66	75	75	131	90	117	131	75	64	72	96	88	70	75	76
ENSG00000092470	219	206	213	218	198	209	212	205	151	178	143	158	186	159	157	165	156	171	188	144	181	191	191	170	169	148	132	160	167	161	176	164	180	172	181	179	170	182	176	162	154	162	167	136	176	198	167	220
ENSG00000092529	8	6	6	9	15	11	7	12	15	16	6	8	11	6	10	5	12	9	12	7	14	13	16	9	7	10	9	17	10	13	13	8	11	1	9	6	11	3	8	12	5	0	9	5	11	5	9	14
ENSG00000092531	140	128	144	141	170	160	134	148	110	114	107	115	122	121	121	114	106	108	111	103	138	134	140	127	125	124	145	130	117	126	143	133	134	112	145	122	164	141	149	140	134	129	124	100	150	108	157	122
ENSG00000092607	0	0	0	1	0	0	0	0	0	0	0	1	0	1	0	0	0	1	1	3	0	0	2	0	1	0	1	1	0	0	0	2	0	0	0	2	1	1	0	2	0	1	0	0	0	1	2	0
ENSG00000092621	332	357	372	333	190	192	197	205	590	564	559	531	440	412	404	410	563	562	545	573	280	255	270	285	555	512	573	530	391	362	382	381	492	461	480	452	250	239	230	271	497	452	469	483	390	392	415	395
ENSG00000092758	17	20	8	15	17	20	18	18	26	24	32	36	24	25	18	26	23	22	28	18	27	21	20	19	31	37	28	17	23	22	9	20	24	16	20	16	26	14	16	13	17	20	20	17	18	27	21	15
ENSG00000092820	834	800	856	795	766	749	785	718	917	841	907	883	940	875	947	886	911	875	894	844	870	766	824	815	845	802	820	800	820	820	857	829	769	776	791	840	851	840	844	904	774	779	786	770	898	850	927	869
ENSG00000092841	461	485	455	492	662	640	662	675	640	544	572	589	888	830	870	832	654	657	633	637	831	708	771	755	589	569	593	592	780	765	784	775	447	468	496	487	651	650	643	661	509	510	557	531	770	793	797	809
ENSG00000092847	243	241	231	232	202	192	211	218	277	252	300	232	235	234	231	225	275	248	272	257	203	189	181	191	248	263	281	241	223	240	205	264	199	241	219	212	218	203	197	197	238	229	236	245	215	216	265	258
ENSG00000092850	1	1	1	1	1	0	4	1	9	7	7	3	0	2	5	1	4	3	3	7	3	3	1	1	8	6	7	7	3	1	2	1	2	1	5	3	0	2	1	2	4	3	3	5	3	1	4	4
ENSG00000092853	234	235	271	239	240	240	242	256	154	132	151	127	159	136	159	122	178	154	165	160	229	237	214	213	135	120	154	142	189	152	183	141	202	191	173	207	273	219	250	203	125	142	127	128	182	179	162	160
ENSG00000092871	35	41	43	42	32	27	42	33	26	30	38	43	41	41	42	27	35	38	37	37	28	31	26	28	42	30	42	37	25	44	28	23	43	35	33	38	27	44	34	25	35	26	38	45	39	30	28	35
ENSG00000092929	71	74	79	69	91	92	104	95	170	156	188	193	127	129	114	122	202	166	181	163	126	132	142	117	185	171	189	180	107	114	115	110	113	114	128	121	119	109	130	105	146	137	140	165	143	142	138	125
ENSG00000092931	103	92	105	108	84	77	93	77	77	95	94	107	96	57	90	66	94	98	86	96	78	65	97	72	93	107	104	84	111	85	97	97	101	103	103	100	73	62	63	75	83	73	125	99	97	78	90	78
ENSG00000092964	1116	1098	1141	1129	1060	965	1019	1017	1337	1337	1352	1308	1222	1155	1300	1224	1315	1133	1305	1204	1025	1002	1061	988	1245	1191	1211	1170	1166	1135	1140	1127	1113	1032	1146	1060	891	784	937	887	1114	1077	1093	1071	1166	1119	1106	1096
ENSG00000092969	2	2	2	0	2	0	2	2	2	1	3	0	1	2	3	2	2	1	2	0	0	4	0	0	2	1	0	3	0	0	1	1	2	4	3	1	2	1	0	0	1	0	2	4	1	1	0	0
ENSG00000092978	52	45	54	43	43	35	45	33	26	32	39	31	42	40	37	34	32	33	48	39	41	39	40	40	37	36	31	39	48	36	33	38	38	45	35	55	42	34	42	41	33	41	27	49	44	39	43	40
ENSG00000093000	546	507	546	528	406	372	423	420	403	396	409	375	378	353	398	370	385	409	409	399	403	390	353	345	374	311	388	405	396	389	413	380	462	493	460	470	450	374	401	406	379	400	352	367	414	375	439	370
[truncated: 62,259 more rows]

## Sheet: RS4_Dexa
ENSEMBL	RS4_A_L1	RS4_A_L2	RS4_A_L3	RS4_A_L4	RS4_B_L1	RS4_B_L2	RS4_B_L3	RS4_B_L4	RS4_C_L1	RS4_C_L2	RS4_C_L3	RS4_C_L4	RS4_D_L1	RS4_D_L2	RS4_D_L3	RS4_D_L4	RS4_F_L1	RS4_F_L2	RS4_F_L3	RS4_F_L4	RS4_G_L1	RS4_G_L2	RS4_G_L3	RS4_G_L4	RS4_H_L1	RS4_H_L2	RS4_H_L3	RS4_H_L4	RS4_I_L1	RS4_I_L2	RS4_I_L3	RS4_I_L4	RS4_K_L1	RS4_K_L2	RS4_K_L3	RS4_K_L4	RS4_L_L1	RS4_L_L2	RS4_L_L3	RS4_L_L4	RS4_M_L1	RS4_M_L2	RS4_M_L3	RS4_M_L4	RS4_N_L1	RS4_N_L2	RS4_N_L3	RS4_N_L4
__alignment_not_unique	989833	974525	983799	972854	831393	807898	819426	810468	709479	696792	702477	698337	825037	809524	820853	809773	910590	897844	906264	892123	681370	669044	676366	670666	940182	923349	932705	922182	764271	752544	755055	749428	1021681	1004043	1013994	1001503	840659	827816	834497	826577	857837	841269	846592	836711	828946	809765	821965	813235
__ambiguous	213705	210342	213613	210445	207208	203384	205915	203039	165317	163370	164870	163585	204567	200848	203289	201608	216835	213771	215827	213383	171421	168179	169855	168328	208718	205314	207489	205297	201021	198211	200695	197227	237533	232826	236039	234110	216914	213487	216828	213854	197827	195441	196721	194079	186312	182783	184249	181829
__no_feature	467151	459868	463684	459465	583496	568231	574661	568150	429744	422086	425292	421696	648984	639527	644919	639697	417292	411103	415107	410355	473150	464278	469736	467022	488096	480322	484138	478911	347700	341079	345531	342384	543599	534601	539983	534564	471307	463165	466637	462470	491812	484290	489647	483626	517891	509320	514124	507625
__not_aligned	0	0	0	0	0	0	0	0	0	0	0	0	0	0	0	0	0	0	0	0	0	0	0	0	0	0	0	0	0	0	0	0	0	0	0	0	0	0	0	0	0	0	0	0	0	0	0	0
__too_low_aQual	0	0	0	0	0	0	0	0	0	0	0	0	0	0	0	0	0	0	0	0	0	0	0	0	0	0	0	0	0	0	0	0	0	0	0	0	0	0	0	0	0	0	0	0	0	0	0	0
ENSG00000000003	1	0	1	1	1	1	0	0	0	1	0	0	0	0	0	0	1	0	0	0	0	0	0	0	0	0	1	0	0	0	0	0	0	0	0	0	1	0	0	1	2	0	0	0	0	1	0	0
ENSG00000000005	0	0	0	0	0	0	0	0	0	0	0	0	0	0	0	0	0	0	0	0	0	0	0	0	0	0	0	0	0	0	0	0	0	0	0	0	0	0	0	0	0	0	0	0	0	0	0	0
ENSG00000000419	204	172	179	188	176	172	151	165	144	141	141	140	151	131	151	127	168	172	163	160	101	110	106	92	181	177	185	178	134	129	156	168	231	197	206	212	128	129	154	144	150	135	151	162	137	117	131	130
ENSG00000000457	68	41	68	72	61	65	72	58	40	52	48	42	59	54	59	60	30	37	47	43	45	37	56	36	38	39	53	52	59	54	52	67	78	53	80	62	69	59	53	83	69	48	43	45	71	65	64	69
ENSG00000000460	130	142	124	130	105	80	82	78	116	110	90	102	91	106	107	96	107	107	114	99	55	57	59	53	99	113	108	107	85	73	99	81	149	147	137	143	78	79	89	62	131	116	110	121	82	83	89	65
ENSG00000000938	0	0	0	0	0	2	1	1	0	0	0	0	2	0	0	2	1	0	0	0	0	2	0	1	0	0	0	0	2	0	0	0	1	0	0	0	2	4	1	2	0	0	0	0	3	1	1	1
ENSG00000000971	0	0	0	0	0	1	0	0	0	0	0	0	0	1	0	1	0	2	1	0	0	1	0	0	1	2	2	2	1	0	0	0	0	0	2	0	0	0	1	1	0	0	1	3	0	1	0	1
ENSG00000001036	6	6	6	5	4	9	6	6	5	3	4	6	2	3	5	4	5	4	3	9	1	2	4	7	2	11	8	4	2	3	3	3	3	6	4	7	5	5	10	12	3	2	8	4	5	3	1	3
ENSG00000001084	207	220	205	210	234	270	243	251	178	194	158	193	220	213	214	208	195	163	165	156	175	190	182	181	286	292	286	271	205	167	157	167	221	215	217	215	243	258	233	235	207	201	198	206	222	219	229	212
ENSG00000001167	563	533	589	542	478	459	446	428	471	470	472	453	457	447	476	426	465	471	497	446	345	332	322	386	647	616	624	667	359	309	343	334	625	667	564	603	467	491	428	469	568	533	544	531	420	374	384	408
ENSG00000001460	1	0	0	5	0	2	1	3	0	1	1	4	0	0	1	1	0	2	1	3	1	3	2	1	2	0	1	1	2	1	0	0	0	0	1	2	0	1	3	1	3	4	2	2	4	3	3	1
ENSG00000001461	134	136	136	131	158	144	141	160	116	111	93	114	108	101	123	121	114	115	129	154	99	101	102	98	202	241	212	215	101	107	101	99	168	144	172	135	182	190	172	170	115	121	156	159	123	92	89	82
ENSG00000001497	389	362	394	371	403	399	411	382	333	337	335	361	436	467	468	442	446	414	412	457	337	348	371	342	345	337	316	293	350	364	356	384	416	411	456	418	396	366	422	355	351	377	375	366	373	325	357	349
ENSG00000001561	91	104	103	104	155	110	116	134	67	72	69	101	68	77	73	70	73	73	69	81	82	76	91	81	133	154	156	150	72	53	57	60	113	118	128	126	158	148	163	138	91	81	74	78	73	79	91	84
ENSG00000001617	17	11	17	13	8	12	6	7	12	18	6	11	9	9	13	6	12	13	13	17	7	6	7	10	29	31	31	25	11	13	11	14	20	15	23	24	15	9	8	10	14	10	17	27	8	11	8	10
ENSG00000001626	0	0	0	0	0	0	0	0	0	0	0	0	0	0	0	0	0	0	0	0	0	0	0	0	0	0	0	0	0	0	0	0	0	0	0	0	0	0	0	0	0	0	0	0	0	0	0	0
ENSG00000001629	378	367	389	367	267	243	240	284	324	335	323	318	284	298	310	273	248	240	213	229	218	175	190	210	454	441	470	452	204	186	208	205	404	379	411	422	272	245	261	262	352	332	330	340	202	179	198	204
ENSG00000001630	184	171	201	171	46	54	42	53	98	94	85	92	58	47	48	54	111	98	128	129	37	44	51	51	127	123	115	131	63	52	58	48	184	197	181	168	65	61	58	59	145	160	153	127	53	47	43	43
ENSG00000001631	222	214	259	241	157	168	162	185	167	173	171	179	168	167	163	171	139	138	159	130	85	91	111	114	216	199	193	211	112	114	112	100	274	240	262	259	183	200	178	146	187	201	190	192	149	173	150	139
ENSG00000002016	97	88	105	83	96	85	98	95	81	82	74	80	92	61	78	74	68	41	54	65	57	44	51	59	99	117	107	110	80	65	66	67	127	124	116	125	112	143	148	118	92	97	75	92	75	67	92	70
ENSG00000002079	1	4	1	3	2	1	2	1	1	2	4	1	1	1	2	1	0	1	0	2	1	1	0	0	1	0	2	0	3	1	1	0	1	1	3	3	1	2	2	0	2	1	0	0	0	0	1	0
ENSG00000002330	73	57	79	59	48	65	58	64	49	47	35	32	54	49	45	45	66	65	58	60	47	56	47	56	71	73	73	59	70	80	66	77	87	70	82	67	52	63	58	56	78	64	53	57	44	49	61	45
ENSG00000002549	465	440	477	446	437	450	405	437	388	352	399	402	423	423	447	405	460	421	485	457	315	281	331	347	470	494	481	459	388	371	382	377	495	501	497	508	366	378	389	408	435	475	418	398	335	358	350	379
ENSG00000002586	601	634	612	565	413	368	368	363	465	425	451	407	440	456	474	470	682	639	665	656	388	369	376	379	675	675	625	634	543	497	514	521	648	583	621	621	538	521	538	539	548	563	588	583	486	478	538	471
ENSG00000002587	3	0	2	1	1	0	2	1	0	0	0	0	0	0	0	0	2	3	0	1	0	0	0	0	1	1	1	3	0	1	0	0	0	0	0	2	0	0	0	0	1	2	1	0	0	2	1	1
ENSG00000002726	0	0	0	0	0	0	0	0	0	0	0	0	0	0	0	0	0	0	0	0	0	0	0	0	0	0	0	0	0	0	0	0	0	1	0	0	0	0	0	0	0	0	0	0	0	0	0	0
ENSG00000002745	1	0	0	1	1	3	0	0	0	1	1	0	0	0	0	0	0	1	1	0	0	0	0	0	0	2	1	1	0	1	0	0	1	0	0	0	2	1	0	0	0	0	0	0	0	0	2	0
ENSG00000002746	49	49	39	46	80	79	70	76	21	31	37	36	92	100	95	91	31	31	33	35	76	72	81	65	47	37	74	62	65	64	82	56	53	38	47	40	89	92	75	94	50	60	53	48	100	99	82	89
ENSG00000002822	100	108	128	120	93	84	82	90	83	72	94	77	96	90	79	85	109	118	121	125	84	65	73	84	82	87	106	74	90	98	105	99	131	147	117	115	89	89	86	88	96	89	89	87	95	87	68	65
ENSG00000002834	878	843	839	805	910	809	930	939	656	606	630	563	873	868	832	769	904	826	898	813	808	795	839	733	982	926	950	929	901	884	883	871	983	975	998	1013	1052	1067	1018	1050	812	848	790	759	789	785	791	838
ENSG00000002919	123	99	108	93	123	135	128	120	89	77	92	83	105	115	103	110	114	102	100	114	104	92	104	96	100	142	116	149	106	104	88	102	119	123	124	117	133	116	130	146	115	115	101	117	153	137	121	134
ENSG00000002933	0	0	0	0	0	0	0	0	0	0	0	0	0	0	0	0	0	0	0	1	0	0	0	0	0	0	0	0	0	0	0	0	0	0	0	0	0	1	0	0	0	0	0	0	0	0	0	0
ENSG00000003056	489	488	520	493	454	449	519	466	379	383	389	361	487	492	521	490	501	440	474	463	426	368	402	363	591	591	571	554	419	441	411	439	560	551	626	591	531	463	505	495	483	454	489	482	420	446	450	402
ENSG00000003096	4	8	4	2	0	0	1	0	2	6	2	5	2	0	0	1	1	3	2	2	1	0	1	0	5	5	3	8	0	0	1	0	1	7	4	3	2	0	2	0	5	4	7	8	2	0	0	3
ENSG00000003137	3	2	0	5	3	2	0	1	2	2	1	2	5	2	0	3	2	3	4	3	1	3	4	2	2	0	4	2	5	5	9	2	5	4	4	3	2	3	3	3	0	4	2	2	5	3	2	1
ENSG00000003147	1	1	0	0	0	0	0	0	1	0	0	0	0	0	1	0	0	0	1	2	0	0	0	0	0	0	0	1	0	0	0	0	1	0	0	0	1	0	1	0	0	0	0	0	0	0	1	0
ENSG00000003249	0	0	0	1	2	0	2	7	1	0	0	0	0	0	0	0	1	0	0	0	2	3	4	1	0	0	0	0	0	2	1	0	0	1	0	0	3	4	1	2	0	0	0	0	0	0	0	0
ENSG00000003393	122	132	132	137	130	123	137	103	109	110	103	118	86	103	92	109	94	102	99	116	69	75	79	89	186	192	160	159	77	99	80	76	138	139	159	161	130	142	160	129	117	115	94	131	89	92	109	108
ENSG00000003400	60	51	56	61	49	44	59	47	45	41	43	35	43	47	39	36	38	36	35	50	36	28	37	37	57	56	62	67	28	45	31	34	72	69	55	52	63	55	67	60	41	48	49	56	30	40	30	25
ENSG00000003402	160	126	149	145	181	197	196	190	121	115	117	113	206	220	215	232	110	115	95	126	168	170	156	167	196	134	173	156	139	178	143	141	177	160	155	162	215	222	207	216	152	141	161	135	246	238	251	216
ENSG00000003436	3	1	0	1	22	21	19	22	1	0	1	1	2	7	3	6	2	1	0	0	24	14	15	20	3	2	5	3	2	0	1	3	3	4	0	2	25	14	27	22	2	1	5	1	2	7	0	3
ENSG00000003509	71	84	89	66	77	67	64	56	73	76	66	57	64	62	68	45	67	58	51	55	53	49	43	44	94	110	64	92	62	63	48	57	103	97	84	94	68	67	74	76	67	70	69	63	47	65	61	63
ENSG00000003756	596	589	571	556	627	566	646	661	446	430	487	443	565	558	590	579	438	398	422	456	443	466	447	410	625	571	569	563	469	493	476	516	646	681	614	612	771	709	752	765	504	472	463	500	594	626	579	561
ENSG00000003987	7	6	9	2	15	13	10	7	3	5	8	5	6	15	7	10	4	10	4	4	8	6	4	5	9	5	8	5	7	4	8	7	1	3	4	9	10	8	9	11	4	3	10	3	6	11	6	4
ENSG00000003989	397	356	384	352	399	492	449	455	348	342	338	330	418	435	397	471	246	221	219	218	341	341	342	325	412	390	426	418	252	263	287	264	399	367	375	421	435	436	414	394	338	346	342	360	313	313	315	323
ENSG00000004059	362	360	374	374	351	328	362	383	299	255	233	259	362	319	329	335	431	389	463	421	340	325	353	335	390	352	349	388	414	393	407	424	435	442	413	414	392	422	400	419	352	335	363	338	326	327	329	333
ENSG00000004139	18	16	19	16	5	11	10	13	9	12	18	10	14	19	12	8	17	19	11	17	9	11	8	8	16	14	22	12	11	7	10	7	21	19	14	16	10	11	13	7	17	15	18	15	16	13	12	21
ENSG00000004142	462	457	504	459	509	512	512	551	344	380	359	415	494	476	479	499	534	520	511	523	481	429	445	447	518	470	507	470	456	481	443	453	535	534	526	536	470	494	503	507	454	461	462	429	415	408	422	408
ENSG00000004399	865	938	946	962	1323	1251	1278	1256	665	665	675	685	754	786	752	732	875	917	866	966	1184	1132	1163	1150	886	821	853	841	706	648	681	695	1032	955	1009	994	1735	1749	1649	1664	822	770	882	800	657	683	667	625
ENSG00000004455	977	1043	1129	1020	1132	1072	1126	1107	835	767	853	818	1158	1181	1163	1173	1024	1031	1035	1031	920	864	870	846	811	840	797	836	1128	1142	1187	1122	1195	1139	1150	1081	1056	1065	1001	1047	870	894	928	842	1012	1048	1014	1048
ENSG00000004468	50	45	49	47	31	29	35	37	45	68	38	47	49	47	56	56	46	50	51	45	21	21	25	22	44	57	43	40	39	33	34	26	34	51	57	39	21	17	20	24	52	37	38	45	54	36	44	39
ENSG00000004478	11	5	11	6	7	2	5	9	8	7	13	11	8	5	4	7	14	9	14	5	3	3	4	3	16	16	11	14	8	6	5	1	8	9	12	8	7	16	12	6	10	15	14	9	6	2	7	5
ENSG00000004487	1174	1073	1169	1125	833	808	826	853	921	951	946	925	790	829	881	808	1143	1112	1100	1173	685	588	635	596	1013	1007	1069	981	745	702	729	705	1179	1178	1123	1139	815	760	876	778	965	923	982	949	643	588	594	674
ENSG00000004534	460	431	403	445	490	509	528	475	398	372	387	362	540	514	511	475	431	433	449	398	372	365	388	369	435	440	475	429	422	391	400	364	499	471	501	504	540	558	589	501	378	399	381	442	412	398	440	424
ENSG00000004660	24	34	31	34	171	152	179	172	24	20	32	41	118	116	125	122	34	28	37	41	135	148	158	153	51	64	36	62	132	99	114	91	63	47	47	45	226	201	203	225	54	28	46	37	117	124	147	134
ENSG00000004700	406	359	399	375	390	379	347	359	307	309	308	340	386	364	329	380	273	257	271	249	275	268	259	274	355	370	381	390	284	286	274	303	425	395	415	413	355	366	372	320	346	344	347	315	312	286	303	294
ENSG00000004766	118	98	120	104	148	136	133	103	96	119	116	95	105	92	91	104	89	77	85	82	91	57	78	85	129	120	129	122	97	65	84	69	140	139	145	131	121	118	118	121	111	110	112	111	102	115	96	107
ENSG00000004776	3	1	0	2	0	0	1	2	0	1	1	2	2	0	1	1	0	1	1	0	3	0	0	1	0	3	3	1	2	1	2	0	0	0	3	0	0	2	0	2	1	0	1	1	2	0	1	0
ENSG00000004777	246	241	237	247	522	442	501	453	238	214	260	246	417	493	488	489	305	314	297	301	508	446	471	478	266	262	268	274	434	380	402	424	393	354	375	416	571	524	554	596	344	339	338	357	493	486	517	473
ENSG00000004779	230	252	244	250	251	251	265	232	192	216	194	167	185	194	192	220	245	227	206	231	149	158	164	173	216	243	262	221	274	261	253	230	294	279	251	267	229	210	218	201	197	176	179	200	189	167	196	222
ENSG00000004799	0	0	0	0	0	0	0	0	0	0	0	0	0	0	0	0	0	0	0	0	0	0	0	0	0	0	0	0	0	0	0	0	0	0	0	0	0	0	0	0	0	0	0	0	0	0	0	0
ENSG00000004809	62	53	57	66	50	56	53	33	45	46	38	49	62	40	53	54	65	48	51	54	38	42	44	39	37	43	42	30	39	49	32	40	55	60	59	54	50	62	38	44	30	43	60	52	39	36	47	42
ENSG00000004838	5	10	13	12	15	13	9	13	9	11	13	8	8	12	8	12	15	14	10	5	14	6	10	8	9	12	11	8	13	10	10	17	12	8	13	14	20	8	25	26	8	8	9	9	13	16	15	7
ENSG00000004846	0	0	0	1	2	0	0	1	0	0	0	0	1	0	0	0	0	0	1	1	0	0	0	2	0	1	0	1	0	1	0	0	0	1	0	2	1	0	0	0	0	0	1	0	1	0	1	1
ENSG00000004848	1	3	6	3	19	21	9	15	2	2	0	3	7	3	8	6	0	1	6	0	12	17	10	8	2	4	1	6	9	10	12	10	1	1	0	2	13	17	24	19	2	0	1	1	9	7	13	4
ENSG00000004864	146	135	142	146	120	105	121	135	117	127	123	121	132	112	131	108	108	135	112	132	107	77	83	100	124	139	137	133	89	98	111	93	153	147	169	146	101	120	114	103	138	144	139	128	108	104	88	109
ENSG00000004866	30	28	29	36	44	36	33	33	30	25	25	22	49	38	45	31	40	40	27	35	30	26	36	38	43	52	40	34	30	36	42	31	34	33	36	42	25	33	31	37	29	25	41	42	53	34	26	30
ENSG00000004897	430	411	441	417	348	353	365	344	364	319	341	323	332	299	326	312	310	299	289	286	228	210	200	215	428	397	406	393	271	255	238	252	454	447	481	492	343	310	330	321	325	312	308	344	300	323	309	335
ENSG00000004939	3	0	0	0	1	1	0	1	0	0	0	0	1	0	0	0	0	0	1	0	1	0	2	0	1	0	0	1	0	1	0	0	0	0	0	2	1	1	2	0	0	0	0	1	0	0	1	0
ENSG00000004948	0	0	0	0	0	0	0	0	0	0	0	0	0	0	0	0	0	0	0	0	0	0	0	0	0	0	0	0	0	0	0	0	0	0	0	0	0	0	0	0	0	0	0	0	0	0	0	0
ENSG00000004961	126	102	108	114	105	121	129	107	75	75	99	70	109	110	83	94	81	99	77	102	83	72	83	97	113	104	92	110	79	99	98	87	108	117	110	116	109	107	93	99	102	78	88	79	92	125	108	78
ENSG00000004975	345	331	398	349	206	212	236	222	260	285	274	281	242	273	247	234	405	350	390	413	192	247	194	211	388	325	358	365	259	278	307	264	423	424	445	429	274	223	240	253	371	392	382	349	202	200	218	200
ENSG00000005001	0	1	0	0	0	0	0	0	0	0	0	0	0	0	0	0	0	0	0	0	0	0	0	0	0	0	0	0	0	0	0	0	0	0	0	0	0	0	0	0	0	0	0	0	0	0	0	0
ENSG00000005007	1069	1068	1101	982	817	812	798	813	699	630	677	642	890	814	909	877	584	604	548	587	769	693	718	751	692	751	731	744	662	658	634	661	941	892	938	878	940	947	938	950	765	750	736	791	864	860	904	904
ENSG00000005020	90	85	74	87	93	86	81	92	69	67	52	67	89	91	74	96	56	63	69	61	65	71	77	56	82	116	94	85	76	56	60	71	93	101	89	87	97	104	92	76	88	85	89	82	55	60	56	81
ENSG00000005022	1740	1797	1788	1738	1899	1814	1851	1916	1472	1464	1494	1445	1825	1741	1734	1711	2151	2075	2183	2126	1540	1535	1637	1551	1734	1702	1704	1671	1562	1673	1642	1568	1996	1951	2023	1941	1755	1674	1681	1796	1728	1599	1732	1620	1479	1496	1408	1468
ENSG00000005059	302	283	287	295	219	242	209	208	255	263	228	228	266	249	258	241	268	269	266	292	161	174	147	157	336	343	352	350	237	278	213	239	348	349	323	339	206	204	210	179	247	271	263	294	219	197	197	216
ENSG00000005073	0	0	0	0	1	0	0	0	0	0	1	0	0	0	0	0	0	0	0	0	0	0	1	0	0	0	0	0	0	0	0	0	0	0	0	0	0	0	0	1	0	0	0	0	1	0	0	0
ENSG00000005075	138	118	126	119	97	127	95	108	82	91	77	86	112	113	113	94	156	168	156	145	90	116	93	113	141	108	117	129	146	132	128	143	145	132	167	149	107	106	124	111	132	126	135	121	111	122	119	115
ENSG00000005100	374	378	389	352	452	453	462	479	389	340	328	344	474	522	533	494	283	239	233	280	334	344	344	350	357	353	300	329	324	284	327	305	386	382	410	403	412	402	430	393	309	321	289	310	413	403	359	371
ENSG00000005102	0	0	0	0	0	0	0	0	0	0	0	0	0	0	0	0	0	0	0	0	0	0	0	0	0	0	0	0	0	0	0	0	0	0	0	0	0	0	0	0	0	0	0	0	0	0	0	0
ENSG00000005108	0	3	1	1	1	0	0	0	0	3	0	1	2	0	1	2	0	4	1	0	0	0	0	1	2	1	1	1	0	1	0	0	4	1	2	1	0	1	0	0	3	2	3	0	0	0	0	0
ENSG00000005156	249	245	226	239	242	209	238	240	211	220	224	205	273	260	263	260	202	183	222	195	183	188	196	191	213	239	194	205	140	165	176	170	259	238	240	253	217	221	222	226	217	227	208	219	218	201	183	213
ENSG00000005175	207	229	218	200	211	171	207	192	180	195	151	172	180	194	161	182	188	179	180	198	126	136	112	118	241	208	281	237	151	153	132	127	230	233	265	193	163	164	176	167	205	200	227	208	153	137	147	141
ENSG00000005187	20	23	23	12	11	9	9	8	15	25	16	16	8	15	8	6	19	19	17	17	10	11	9	7	23	16	26	20	5	6	8	12	27	14	10	23	12	15	15	7	16	12	18	16	8	18	7	5
ENSG00000005189	74	60	50	68	58	58	54	53	55	39	42	42	79	78	61	70	50	59	50	50	39	55	43	41	33	40	28	34	59	73	57	65	59	73	84	84	56	51	44	53	47	47	44	49	67	82	94	75
ENSG00000005194	200	259	242	248	289	309	313	319	205	213	212	201	297	249	284	280	263	289	283	257	234	229	281	236	285	252	281	284	243	259	242	217	294	269	299	309	299	272	280	279	265	235	242	260	251	245	212	219
ENSG00000005206	588	602	561	558	750	807	772	758	531	443	487	493	793	807	842	761	643	599	618	580	724	675	699	669	588	566	540	617	826	811	789	809	710	697	725	712	828	843	816	798	604	576	610	565	871	905	871	837
ENSG00000005238	75	75	90	76	146	157	126	155	69	55	60	52	89	95	82	105	101	75	80	80	141	129	136	144	110	123	120	111	70	94	101	91	91	115	113	105	227	196	191	210	89	94	71	87	133	113	109	112
ENSG00000005243	2	1	1	1	6	3	5	3	2	1	1	0	6	9	3	7	2	5	6	3	6	8	3	3	1	4	3	2	2	4	5	6	2	3	4	2	4	4	10	8	3	3	2	1	5	8	5	7
ENSG00000005249	38	31	52	47	61	66	82	49	29	25	26	27	30	25	40	30	32	36	24	24	42	53	42	46	56	39	64	54	15	15	23	22	47	37	39	48	72	88	79	70	35	30	42	28	24	28	20	24
ENSG00000005302	230	261	245	284	239	236	262	235	193	167	195	188	225	203	215	215	240	245	217	265	181	156	195	149	227	240	247	272	187	175	191	169	257	279	283	290	261	245	281	248	250	227	215	219	183	197	210	188
ENSG00000005339	1165	1158	1160	1165	895	848	916	906	907	988	949	935	1026	1018	1046	995	813	801	772	826	825	826	780	828	1398	1380	1371	1356	672	683	657	669	1131	1162	1202	1153	898	898	889	911	1011	1005	1008	1032	854	835	898	809
ENSG00000005379	776	809	769	729	220	223	223	207	740	757	738	700	418	390	411	395	918	882	919	843	217	222	209	200	868	886	930	855	388	392	372	381	920	872	931	910	223	261	275	289	898	850	863	831	375	356	381	350
ENSG00000005381	1	0	1	4	1	0	1	1	0	1	1	0	0	0	5	0	0	1	1	1	1	0	0	0	0	0	0	0	0	1	1	1	2	1	3	1	0	0	0	2	1	0	0	2	0	1	3	2
ENSG00000005421	0	0	0	0	0	0	0	0	0	0	0	0	0	0	0	0	0	0	0	0	0	0	0	0	0	0	0	0	0	0	0	0	0	1	0	0	0	0	0	0	0	0	0	0	0	0	0	0
ENSG00000005436	91	97	101	116	92	97	69	91	105	94	93	91	91	71	89	73	66	74	69	78	61	43	51	65	101	80	109	77	58	40	46	50	106	89	100	100	68	69	96	65	96	88	59	93	66	58	56	60
ENSG00000005448	299	263	318	310	169	169	197	168	195	172	144	170	201	208	212	209	300	305	356	322	178	164	169	134	168	171	171	193	331	360	313	361	359	322	332	312	241	231	211	226	232	251	236	229	196	223	221	219
ENSG00000005469	27	31	31	19	34	42	39	33	19	22	23	24	33	46	27	30	30	26	24	23	31	22	21	33	36	46	49	38	17	27	22	28	32	24	31	27	30	32	40	41	27	28	16	26	29	30	33	35
ENSG00000005471	29	40	48	37	15	18	27	22	22	24	27	22	17	18	19	12	20	31	23	28	15	17	14	19	32	38	31	30	9	9	16	10	49	38	45	45	18	17	23	26	26	44	19	27	13	14	16	7
ENSG00000005483	917	994	1000	1052	512	516	520	534	742	727	765	734	852	861	836	841	611	556	569	614	489	489	464	476	870	885	901	829	601	570	567	578	957	1003	924	916	672	670	644	703	683	726	678	686	643	628	697	639
ENSG00000005486	101	112	94	126	111	131	127	102	92	72	90	75	141	113	141	146	116	127	118	109	132	115	120	110	94	87	112	114	104	121	125	113	110	105	144	100	140	135	142	136	101	121	117	97	136	139	136	128
ENSG00000005513	0	0	0	0	0	0	0	0	0	0	0	0	0	0	0	0	0	0	0	0	0	0	0	0	0	0	0	0	0	0	0	0	0	0	0	0	0	0	0	0	0	0	0	0	0	0	0	0
ENSG00000005700	353	335	357	330	274	276	273	332	285	299	287	320	286	280	274	260	207	216	239	236	204	182	211	198	428	376	414	404	177	176	177	176	336	380	358	329	275	273	272	265	305	270	298	269	192	210	207	210
ENSG00000005801	198	202	193	192	193	191	167	164	171	178	200	174	231	217	222	244	159	159	162	176	151	125	146	141	222	215	221	228	118	124	135	123	230	264	248	260	192	170	176	193	206	194	184	169	162	155	167	170
ENSG00000005810	446	461	439	452	480	515	510	509	418	397	399	389	652	613	595	585	245	221	242	221	460	382	388	388	418	403	408	394	312	319	332	314	455	423	452	425	464	524	520	525	382	372	344	344	418	394	388	398
ENSG00000005812	157	161	144	168	126	107	119	123	120	117	113	128	105	93	104	117	79	81	99	98	68	75	61	79	170	147	118	148	91	78	86	87	185	157	153	142	149	129	138	141	112	100	108	113	130	113	110	121
ENSG00000005844	134	117	127	117	493	478	486	521	136	118	134	141	597	597	639	558	182	162	145	156	468	468	462	485	223	232	244	208	494	485	480	474	186	183	205	206	740	751	715	768	336	313	299	300	683	664	730	656
ENSG00000005882	35	31	36	36	22	19	26	28	34	40	21	19	30	23	22	22	37	38	33	36	32	19	26	32	44	33	44	35	32	33	31	33	36	43	34	42	26	43	35	41	29	20	37	35	27	30	29	20
ENSG00000005884	1	2	1	1	1	2	2	2	0	1	1	1	1	2	3	0	1	0	1	0	1	5	2	1	1	0	1	0	0	1	0	0	0	1	1	1	0	0	0	3	1	1	0	1	0	1	1	1
ENSG00000005889	456	434	429	442	418	431	393	406	377	355	400	351	496	480	514	492	268	252	216	217	350	340	382	352	402	368	368	419	295	294	288	327	431	442	433	431	453	436	434	463	323	338	316	331	437	430	408	436
ENSG00000005893	406	388	419	420	444	402	442	425	365	351	347	328	378	361	341	368	321	317	327	305	295	286	295	297	493	493	505	527	312	304	310	288	433	425	418	418	385	371	390	386	393	397	431	400	320	328	286	318
ENSG00000005961	6	11	10	5	13	12	12	6	5	10	7	7	13	11	8	13	12	11	13	14	14	7	13	8	7	3	3	1	12	18	23	18	17	11	14	16	28	28	28	19	5	2	6	8	9	10	16	14
ENSG00000005981	0	0	0	0	0	1	0	0	0	0	0	0	0	0	0	0	0	1	0	0	0	0	0	0	0	0	0	1	0	0	0	0	0	0	0	0	0	0	0	0	0	0	0	0	0	0	0	0
ENSG00000006007	190	187	208	221	170	167	165	160	162	178	165	173	165	190	189	159	206	221	218	205	125	108	134	123	321	327	285	288	148	146	134	142	221	204	262	251	186	150	175	152	195	206	196	213	106	141	120	142
ENSG00000006015	174	145	180	151	162	154	148	173	114	105	113	117	134	116	120	153	124	132	117	119	136	148	124	102	149	132	138	126	223	179	197	182	155	147	157	154	146	138	149	138	128	129	145	103	152	131	142	137
ENSG00000006016	6	7	3	4	7	11	12	6	3	9	5	8	9	17	10	11	9	13	15	11	13	8	15	4	4	6	4	5	10	9	12	9	10	10	3	11	7	12	12	7	2	4	2	5	7	14	12	16
ENSG00000006025	97	91	74	100	138	126	120	112	82	74	104	73	115	113	93	93	135	107	140	108	105	93	97	96	142	139	122	153	76	74	87	87	130	107	125	136	140	125	124	151	116	116	114	116	108	97	112	94
ENSG00000006042	0	0	2	0	0	2	2	0	1	0	0	0	0	1	0	0	0	2	0	0	0	1	0	1	0	1	0	0	0	0	1	0	1	3	0	2	0	1	1	0	0	2	0	0	0	0	0	0
ENSG00000006047	0	0	0	0	0	0	0	0	0	1	0	1	1	0	0	0	0	0	0	1	0	0	0	0	0	1	1	0	0	0	0	0	0	0	1	0	0	0	0	0	1	0	0	1	1	0	0	1
ENSG00000006059	0	0	0	0	0	0	0	0	0	0	0	0	0	0	0	0	0	0	0	0	0	0	0	0	0	0	0	0	0	0	0	0	0	0	0	0	0	0	0	0	0	0	0	0	0	0	0	0
ENSG00000006062	95	114	84	93	68	42	69	62	85	64	67	64	74	92	87	86	93	81	100	71	56	56	69	49	107	106	89	114	79	59	82	72	115	104	109	108	76	102	71	93	96	92	98	97	82	73	91	98
ENSG00000006071	0	0	0	0	0	0	0	0	1	0	1	0	0	0	0	0	2	0	0	0	0	0	1	0	2	0	0	1	1	0	1	0	0	1	0	0	0	0	0	1	0	1	1	0	0	0	0	1
ENSG00000006116	0	0	0	0	0	0	0	0	0	0	0	0	0	0	0	0	0	0	0	0	0	0	0	0	0	0	0	0	0	0	0	0	0	0	0	0	0	0	0	0	0	0	0	0	0	0	0	0
ENSG00000006118	1	0	0	1	1	1	1	3	1	1	0	1	0	0	0	1	2	1	0	0	1	0	0	2	0	0	0	2	0	1	0	1	0	1	1	1	0	0	2	0	0	1	1	0	1	1	1	0
ENSG00000006125	1118	1082	1044	1057	967	920	912	892	905	862	965	885	959	932	1014	922	996	895	923	979	767	751	750	708	1131	1096	1194	1150	801	764	732	753	1108	1080	1044	1173	979	943	932	965	1033	958	966	991	747	723	700	722
ENSG00000006128	0	0	0	0	0	0	0	0	0	0	0	0	0	0	0	0	0	0	0	0	0	0	0	0	0	0	0	0	0	0	0	0	0	0	0	0	0	0	0	0	0	0	0	0	0	0	0	0
ENSG00000006194	304	278	305	267	312	266	300	309	212	210	216	221	277	274	294	292	257	261	267	243	212	205	229	211	325	311	310	311	256	279	258	243	295	307	346	324	312	332	298	296	250	233	240	215	279	271	277	276
ENSG00000006210	0	0	0	0	0	0	2	0	0	0	0	1	0	0	0	0	0	1	0	0	0	0	0	0	0	0	0	1	0	0	0	0	0	0	0	0	0	0	1	0	1	0	0	0	1	1	0	2
ENSG00000006282	128	133	149	114	302	295	287	279	102	96	99	102	230	207	276	210	170	154	123	131	233	254	285	251	172	145	146	157	214	195	221	230	161	155	166	147	356	349	357	332	150	121	140	163	221	238	208	227
ENSG00000006283	0	2	0	0	0	0	0	0	0	1	1	0	0	1	0	0	0	0	0	0	0	1	0	0	0	0	0	0	0	1	1	0	0	1	0	0	0	0	0	0	0	0	0	0	0	0	0	0
ENSG00000006327	6	9	15	18	16	10	19	22	5	10	8	5	22	14	8	18	8	6	9	9	15	18	19	20	8	8	7	12	13	8	11	8	12	12	10	14	21	19	17	24	7	11	6	3	22	17	16	11
ENSG00000006377	4	0	0	3	0	0	2	1	1	3	2	2	0	0	0	0	0	2	3	1	0	0	0	0	1	3	1	0	0	0	0	0	3	4	1	2	0	0	0	0	4	1	4	2	0	1	0	0
ENSG00000006432	27	24	29	21	18	23	20	17	18	20	17	22	20	24	18	20	15	16	14	9	15	10	16	8	21	17	21	23	13	9	14	12	27	28	23	25	31	26	24	15	14	16	9	10	21	28	21	21
ENSG00000006451	116	124	119	120	121	115	123	116	119	113	108	100	96	86	90	83	123	119	88	100	72	75	62	64	132	133	111	122	128	102	96	89	146	138	112	126	107	98	112	82	93	113	102	82	75	82	86	84
ENSG00000006453	27	26	26	31	48	41	38	55	33	23	27	18	58	49	39	31	29	38	30	32	33	43	41	35	52	57	67	68	57	48	49	42	51	46	38	36	61	57	77	60	37	41	41	44	37	30	37	33
ENSG00000006459	81	49	69	69	74	70	70	78	53	47	46	58	66	64	78	76	48	42	36	44	51	62	61	56	125	140	121	128	46	35	44	54	77	68	72	83	107	81	88	113	48	58	73	54	78	66	58	75
ENSG00000006468	35	29	39	30	7	7	12	6	19	21	20	18	13	20	19	12	37	31	26	42	10	10	3	9	27	24	19	25	16	19	14	12	38	37	50	54	13	10	7	7	28	28	25	38	22	15	18	11
ENSG00000006530	164	143	152	172	153	136	161	143	131	158	131	123	124	144	162	149	141	151	151	119	116	108	103	115	163	129	131	132	102	103	109	106	188	174	155	173	137	152	141	134	136	147	147	143	110	118	118	111
ENSG00000006534	41	34	36	44	77	66	75	69	23	24	20	27	39	38	64	46	27	34	23	36	60	76	65	63	41	26	17	25	49	75	61	51	36	44	44	38	104	93	95	81	28	38	41	27	51	66	63	58
ENSG00000006555	0	0	0	0	0	0	0	0	0	0	0	0	0	0	0	0	0	0	0	0	0	0	0	0	0	0	0	0	0	0	0	0	0	0	0	0	0	0	0	0	0	0	0	0	0	0	0	0
ENSG00000006576	281	264	273	234	202	163	162	145	195	176	201	191	150	149	181	164	166	134	146	165	107	97	126	103	254	284	265	270	124	137	94	129	253	271	280	258	134	148	163	151	204	192	188	195	177	190	157	167
ENSG00000006606	0	1	0	0	0	0	0	0	0	0	0	0	0	0	0	0	0	0	0	0	0	0	0	0	0	0	0	0	0	0	0	0	0	0	0	0	0	0	0	0	0	0	0	0	0	0	0	0
ENSG00000006607	256	296	268	278	285	302	300	292	262	222	213	228	256	275	303	265	175	189	180	185	223	210	226	197	301	300	280	272	152	190	149	175	285	273	300	273	283	234	257	267	267	253	244	225	233	222	268	256
ENSG00000006611	0	0	0	0	0	0	0	0	0	0	0	0	0	0	0	0	0	0	0	0	0	0	0	0	0	0	0	0	0	0	0	0	0	0	0	0	0	0	0	0	0	0	0	0	0	0	0	0
ENSG00000006625	87	114	103	114	78	77	105	101	93	87	83	97	95	104	86	102	122	114	117	107	56	63	83	71	106	113	117	121	78	75	97	87	124	116	120	117	88	91	83	93	98	96	111	105	77	81	70	63
ENSG00000006634	327	325	305	334	270	265	245	259	269	260	301	279	263	245	248	250	274	263	284	251	178	165	178	155	315	350	353	315	195	202	216	221	348	386	350	357	242	222	200	212	287	249	265	269	264	242	215	224
ENSG00000006638	9	3	3	2	76	75	68	71	3	4	10	1	30	30	36	33	7	2	4	9	45	50	54	44	7	4	6	3	38	46	33	23	9	7	10	4	79	76	88	102	5	8	3	4	38	32	28	44
ENSG00000006652	161	158	155	167	208	215	234	235	174	129	158	158	167	172	154	157	163	151	160	185	140	138	113	141	242	216	231	253	141	135	124	125	201	212	229	219	173	184	172	173	167	180	192	211	140	156	166	148
ENSG00000006659	0	0	0	0	0	0	0	0	0	0	0	0	0	0	0	0	0	0	0	0	0	0	0	0	0	0	0	0	0	0	0	0	0	0	0	0	0	0	0	0	0	0	0	0	0	0	0	0
ENSG00000006695	126	104	112	107	120	115	114	101	105	108	112	92	95	92	115	104	123	105	116	106	85	87	92	94	165	124	128	115	106	105	92	90	150	138	136	107	106	103	101	87	105	123	104	111	110	84	93	78
ENSG00000006704	80	92	76	85	39	48	42	29	70	48	63	65	42	51	52	40	72	92	91	82	27	30	35	35	81	82	68	88	41	49	31	48	98	81	96	90	51	40	37	44	96	82	93	74	44	39	34	38
ENSG00000006712	316	343	345	303	272	283	268	308	218	191	233	208	257	283	303	274	369	376	397	403	244	249	267	254	270	279	310	339	325	301	322	313	374	335	377	363	306	296	304	277	313	300	275	280	259	274	279	270
ENSG00000006715	140	132	150	127	154	148	166	154	110	108	144	83	119	106	100	116	116	109	112	101	82	117	102	105	142	135	175	147	89	90	104	86	177	142	145	157	141	171	171	168	111	108	135	128	112	84	88	86
ENSG00000006740	82	77	99	96	89	81	90	89	86	71	66	69	85	70	75	83	84	84	87	74	61	85	67	72	100	84	100	106	48	56	52	61	93	96	91	83	97	98	93	97	93	81	81	81	47	68	50	58
ENSG00000006744	721	730	634	657	811	781	730	799	607	588	543	528	766	772	731	716	673	668	710	664	679	643	674	678	573	571	640	635	627	625	611	610	695	710	685	676	780	779	786	759	655	631	611	599	607	582	614	646
ENSG00000006747	0	0	1	0	0	0	1	1	2	0	0	0	1	0	0	0	0	0	0	1	0	1	0	0	0	0	0	0	1	1	0	1	1	0	0	1	1	0	0	0	0	0	0	0	0	0	0	0
ENSG00000006756	152	168	128	175	324	299	331	314	128	128	119	124	249	227	257	234	158	141	137	141	296	270	283	285	165	164	185	166	208	215	228	201	183	170	156	184	406	397	373	402	160	128	139	165	268	248	234	248
ENSG00000006757	0	0	1	0	0	0	0	0	0	0	0	1	0	0	0	0	0	0	0	0	0	0	0	1	0	0	0	0	0	0	0	0	0	0	0	0	0	0	0	0	0	0	0	0	0	0	0	0
ENSG00000006788	0	0	0	0	4	2	2	2	0	0	0	0	0	1	0	0	0	0	0	0	3	2	1	3	0	0	0	1	0	0	0	0	0	0	0	0	4	4	7	5	0	1	0	1	1	0	0	0
ENSG00000006831	738	653	684	675	534	505	512	539	562	495	561	574	554	477	504	541	646	636	616	600	413	386	415	388	697	739	729	712	446	465	436	424	806	768	797	796	636	567	627	577	608	573	591	578	442	443	451	442
ENSG00000006837	2	6	7	5	6	3	9	4	2	4	3	6	5	6	0	2	5	6	6	4	3	3	1	8	7	4	5	9	4	1	1	3	9	4	7	2	3	3	9	4	3	3	10	5	4	7	5	4
ENSG00000007001	0	0	0	0	0	0	0	0	0	0	0	0	0	0	0	1	0	0	0	0	0	0	0	0	0	0	0	0	0	0	0	0	1	0	0	0	0	0	1	0	0	0	0	0	0	0	0	0
ENSG00000007038	0	0	0	0	0	0	0	0	0	0	0	0	0	0	0	0	0	0	0	0	0	0	0	0	0	0	0	0	0	0	0	0	0	0	0	0	0	0	0	0	0	0	0	0	0	0	0	0
ENSG00000007047	214	196	189	189	176	148	147	145	158	171	162	162	124	149	119	146	187	168	193	162	120	118	133	132	238	249	232	227	120	127	139	147	214	215	223	201	192	156	171	173	192	199	190	179	120	98	118	111
ENSG00000007062	2921	2864	2984	2948	2972	2900	2888	2818	2605	2586	2561	2574	3450	3371	3324	3245	2603	2501	2508	2586	2132	2157	2150	2142	3698	3740	3717	3763	2803	2753	2810	2699	3507	3461	3479	3402	2978	2838	2936	2777	2855	2902	2833	2845	2640	2602	2596	2617
ENSG00000007080	324	334	349	295	392	407	386	410	216	249	257	212	343	337	354	327	312	304	308	321	322	320	316	322	359	335	350	313	401	399	399	352	362	341	359	360	350	329	356	359	326	325	305	293	310	277	303	324
ENSG00000007129	18	22	14	27	17	20	19	27	16	9	15	12	7	7	8	12	14	16	16	16	8	17	15	14	14	10	14	15	5	7	5	10	12	18	13	18	22	25	19	24	12	12	15	14	11	8	7	6
ENSG00000007168	808	797	793	772	886	844	838	901	651	598	618	619	809	830	834	840	694	642	649	675	618	612	606	551	708	723	750	695	643	623	653	697	868	863	811	807	786	774	831	747	657	647	650	609	678	709	676	653
ENSG00000007171	0	0	0	0	0	0	0	0	0	0	0	1	1	0	0	0	0	0	0	0	1	0	0	1	0	2	0	0	0	0	1	0	0	0	0	1	2	0	1	0	0	0	0	1	0	0	0	1
ENSG00000007174	0	1	1	2	0	1	2	0	0	0	0	1	0	0	0	1	0	1	0	0	0	0	0	1	0	1	0	0	0	2	0	0	0	0	0	0	0	0	1	1	1	0	0	0	1	0	0	2
ENSG00000007202	1226	1184	1228	1242	1400	1332	1380	1423	1077	1171	1128	1093	1527	1461	1485	1399	1236	1187	1207	1192	1217	1164	1161	1148	1316	1235	1235	1221	989	973	954	961	1360	1290	1331	1367	1434	1382	1449	1389	1102	1147	1162	1091	1030	1045	1007	1003
ENSG00000007216	0	0	0	0	0	0	0	0	0	0	0	0	0	0	0	0	0	0	0	0	0	0	0	0	0	0	0	0	0	0	0	0	0	0	0	0	0	0	0	0	0	0	0	0	0	0	0	0
ENSG00000007237	343	338	354	356	193	199	185	198	272	263	255	254	239	226	231	227	306	289	310	316	146	153	150	157	318	318	339	309	185	174	191	166	368	349	347	330	197	208	202	202	267	278	262	270	262	221	251	225
ENSG00000007255	69	66	72	65	78	103	96	79	40	43	29	39	108	74	82	102	70	74	75	78	69	64	93	90	43	47	43	30	111	125	101	113	53	68	80	71	102	82	72	88	54	40	49	47	88	75	91	101
ENSG00000007264	0	0	0	0	0	0	0	0	0	0	0	0	0	0	1	0	0	0	0	0	0	0	0	0	0	0	0	0	0	0	0	0	0	0	1	0	0	0	0	0	0	0	0	0	0	0	0	0
ENSG00000007306	0	0	0	0	0	0	0	0	0	0	0	0	0	0	0	0	0	0	0	0	0	0	0	0	0	0	0	0	0	0	0	0	0	0	0	0	0	0	0	0	0	0	0	0	0	0	0	0
ENSG00000007312	393	375	382	413	162	167	169	169	263	235	234	253	187	202	211	219	455	488	457	481	185	171	144	183	402	394	417	414	250	253	272	251	461	441	460	453	218	215	205	215	355	372	383	341	161	168	206	182
ENSG00000007314	1	1	1	2	0	1	2	1	2	2	0	2	1	3	1	2	4	1	2	1	3	1	1	0	0	1	4	5	3	4	2	0	5	2	3	1	1	2	1	0	1	1	2	2	3	1	1	2
ENSG00000007341	30	33	38	30	31	37	42	39	28	29	20	20	27	35	31	29	45	31	29	35	26	27	20	26	39	50	29	33	32	25	23	24	37	48	41	41	34	27	25	34	38	33	40	45	23	32	15	27
ENSG00000007350	0	0	0	0	0	0	0	0	0	0	0	0	0	0	0	0	0	0	0	0	0	0	0	0	0	0	0	0	0	0	0	0	0	0	0	0	0	0	0	0	0	0	0	0	0	0	0	0
ENSG00000007372	240	276	256	257	191	153	168	154	192	180	236	222	248	241	207	227	273	277	262	251	158	156	165	152	283	323	272	337	187	161	199	213	309	328	339	317	157	156	171	154	270	242	265	279	199	189	217	198
ENSG00000007376	224	219	241	223	273	313	341	321	180	168	221	169	243	262	255	243	220	227	246	181	275	250	268	237	256	227	271	224	279	295	244	260	280	268	250	260	316	286	274	258	208	234	225	205	271	263	236	280
ENSG00000007384	6	2	0	2	1	4	1	10	2	4	0	0	3	3	1	0	2	4	4	5	4	3	2	4	4	4	9	9	1	0	1	0	8	6	0	2	3	2	4	6	3	5	2	5	4	1	3	1
ENSG00000007392	268	271	257	279	335	283	336	277	238	215	228	222	276	272	290	256	245	219	233	209	219	206	210	179	213	205	208	205	238	243	235	231	284	306	287	312	378	306	312	319	250	241	229	253	260	242	250	224
ENSG00000007402	1	1	0	4	3	3	1	2	4	6	3	1	2	1	1	3	4	2	3	4	2	1	0	4	3	2	5	2	1	4	3	3	7	2	0	4	1	1	2	3	2	3	5	0	2	2	1	3
ENSG00000007516	9	15	18	13	28	14	19	16	4	11	15	12	10	8	19	9	30	17	26	22	25	25	24	23	15	7	16	9	21	19	15	13	23	12	18	17	20	26	32	23	15	13	18	17	23	23	26	33
ENSG00000007520	171	168	142	144	156	162	137	131	116	137	127	94	118	117	118	127	171	171	167	185	123	136	127	116	168	149	150	138	134	136	148	129	157	186	172	179	134	145	133	150	151	164	140	111	117	133	121	109
ENSG00000007541	291	271	289	243	276	239	290	270	208	220	222	236	256	202	242	218	293	303	272	286	253	224	221	210	310	300	324	310	281	237	269	257	299	330	354	320	281	286	304	283	328	327	306	321	227	212	198	233
ENSG00000007545	117	92	96	82	122	135	115	123	89	99	97	104	127	135	140	143	87	84	90	78	92	99	96	84	106	111	112	94	106	87	95	104	130	129	103	104	119	129	112	104	106	75	89	95	151	131	112	130
ENSG00000007866	16	16	15	26	36	34	24	22	15	14	16	18	35	33	20	25	21	20	28	20	26	27	30	29	19	36	26	32	29	22	24	18	22	20	14	13	51	33	36	30	14	22	28	20	22	15	17	26
ENSG00000007908	0	0	0	0	0	0	0	0	0	0	0	0	0	0	0	0	0	0	0	0	0	0	0	0	0	0	0	0	0	0	0	0	0	0	0	0	0	0	0	0	0	0	0	0	0	0	0	0
ENSG00000007923	278	261	261	261	282	283	278	291	215	243	250	201	332	298	309	267	250	288	263	283	273	264	282	235	250	226	284	277	227	238	237	248	295	272	312	294	315	302	291	275	260	267	278	253	273	274	250	264
ENSG00000007933	0	0	0	0	0	0	0	0	0	0	0	0	0	0	0	0	0	0	0	0	0	0	0	0	0	0	1	0	0	0	0	0	0	0	0	0	0	0	0	0	0	0	0	0	0	0	0	0
ENSG00000007944	185	159	175	172	105	79	86	80	106	105	110	104	58	72	68	72	228	200	206	212	76	72	97	68	97	111	99	112	58	60	60	45	187	182	174	188	100	109	107	97	210	216	197	209	98	66	81	56
ENSG00000007952	1	1	1	1	0	0	1	1	0	1	1	0	0	4	3	0	0	1	0	0	1	1	0	0	2	0	0	1	0	0	0	2	2	1	0	1	0	2	1	2	0	0	0	0	0	0	0	0
ENSG00000007968	2100	2193	2182	2177	781	704	712	734	1490	1561	1551	1543	1151	1174	1169	1113	1820	1797	1802	1798	731	700	779	718	1793	1738	1811	1716	977	897	1028	959	2221	2126	2092	2086	815	818	797	812	1823	1725	1786	1776	1057	1052	1060	998
ENSG00000008018	478	432	438	459	505	516	548	465	364	373	417	375	531	460	505	467	535	503	531	485	393	404	419	399	488	523	509	517	494	485	465	444	538	546	517	571	499	480	519	465	452	498	493	418	449	423	397	415
ENSG00000008056	2	4	0	0	0	0	2	0	0	2	1	1	1	3	3	3	2	2	1	5	3	0	0	0	1	0	0	1	2	6	8	0	1	2	2	2	5	3	4	2	1	1	0	1	2	1	0	6
ENSG00000008083	453	422	417	403	262	269	303	267	342	349	340	293	269	371	333	316	334	308	346	386	212	215	208	229	484	465	507	533	281	291	270	284	474	427	489	449	366	379	340	333	329	343	355	369	343	339	381	344
ENSG00000008086	27	33	32	32	58	47	44	52	27	22	22	35	28	35	29	36	19	22	21	18	28	42	46	36	33	34	43	34	18	27	17	20	38	31	37	28	60	56	51	50	22	25	27	29	24	32	31	29
ENSG00000008118	0	0	0	0	0	0	0	0	0	0	0	0	0	0	0	0	0	0	0	0	0	0	0	0	0	0	0	0	0	0	0	0	0	0	0	0	0	0	0	0	0	0	0	0	0	0	0	0
ENSG00000008128	60	53	44	59	66	63	81	64	60	55	48	48	73	80	75	97	70	63	68	82	69	51	72	57	73	70	67	72	57	46	52	59	73	81	93	81	84	80	79	82	77	67	83	59	78	73	72	85
ENSG00000008130	572	571	542	530	519	528	595	506	495	466	459	498	629	615	619	603	537	500	581	540	467	497	472	450	531	520	506	568	548	557	541	556	609	572	592	618	552	554	546	520	529	488	504	488	549	480	503	522
ENSG00000008196	0	0	0	0	1	0	0	0	0	0	0	0	1	0	0	0	0	0	0	0	0	0	2	0	0	0	0	0	0	0	0	0	0	0	0	0	0	0	0	0	0	0	0	0	0	0	0	0
ENSG00000008197	0	0	0	0	0	0	0	0	0	0	0	0	0	0	0	0	0	0	0	0	0	0	0	0	0	0	0	0	0	0	0	0	0	0	0	0	0	0	0	0	0	0	0	0	0	0	0	0
ENSG00000008226	10	15	8	6	21	14	21	14	8	14	11	7	24	32	26	31	9	12	9	14	13	24	17	20	10	4	7	13	13	10	13	13	10	15	22	8	25	26	20	22	15	9	10	11	19	31	25	18
ENSG00000008256	77	72	70	71	56	54	67	62	61	48	63	51	44	41	55	39	43	41	35	40	67	46	56	55	109	94	70	83	41	32	35	34	64	77	74	77	81	93	87	71	53	59	62	50	45	50	49	49
ENSG00000008277	124	147	135	144	63	72	71	88	115	109	122	121	63	65	60	86	103	109	103	94	54	38	58	45	198	194	217	217	57	54	65	38	160	168	139	179	68	57	86	67	145	136	151	119	63	50	58	63
ENSG00000008282	300	308	302	309	218	180	169	206	236	201	238	212	210	197	217	211	288	313	323	311	160	181	152	167	306	301	320	307	180	188	176	185	356	340	379	341	203	199	223	216	271	251	263	255	167	177	168	157
ENSG00000008283	12	15	8	15	34	28	26	23	13	11	9	11	34	19	21	20	13	9	18	16	25	27	22	17	23	19	17	19	13	21	12	23	16	14	15	15	29	25	30	28	13	9	10	18	19	28	23	25
ENSG00000008294	597	567	585	609	529	533	535	559	492	439	454	486	480	506	518	486	380	359	405	384	372	399	370	416	686	690	720	667	352	305	351	315	640	604	636	611	554	555	539	560	478	477	475	519	441	436	423	471
ENSG00000008300	208	193	185	184	142	118	120	132	137	135	165	128	189	169	182	173	167	128	152	177	130	120	131	124	157	151	150	145	194	189	164	185	226	206	200	177	187	189	190	187	179	168	151	171	130	124	141	134
ENSG00000008311	336	306	326	322	249	239	242	251	325	317	292	271	263	254	255	274	286	218	250	247	188	172	174	205	368	344	321	308	160	160	161	152	341	348	364	372	231	258	223	244	292	306	306	292	192	216	216	208
ENSG00000008323	0	0	0	0	0	0	0	0	0	0	0	0	0	0	0	0	0	0	0	0	0	0	0	0	0	0	0	0	0	0	0	0	0	0	0	0	0	1	0	0	0	0	0	0	0	0	0	0
ENSG00000008324	84	78	88	93	108	90	95	69	57	70	73	61	85	68	73	93	98	98	92	103	73	64	70	70	100	88	82	94	94	92	94	87	107	78	95	103	90	66	87	70	79	74	84	87	81	76	59	72
ENSG00000008382	89	89	101	92	75	77	86	77	84	89	74	90	80	79	80	84	102	106	103	103	72	87	84	63	94	86	90	89	90	91	77	102	101	106	86	98	83	80	98	76	88	91	94	83	79	76	73	67
ENSG00000008394	0	0	0	0	0	1	0	0	0	0	0	0	1	0	0	0	0	0	0	0	0	0	1	0	0	0	0	1	0	0	0	0	0	0	0	0	0	1	0	0	0	0	0	1	1	0	0	0
ENSG00000008405	107	149	127	125	135	133	135	130	103	124	112	92	127	144	148	129	113	89	93	96	84	87	112	98	129	114	110	126	110	99	110	89	130	123	125	145	116	136	118	118	108	115	110	113	80	93	84	83
ENSG00000008438	5	3	4	2	2	3	6	0	5	6	6	3	3	3	8	2	2	2	2	2	2	3	1	5	1	1	1	5	1	5	4	4	0	3	4	0	2	1	3	3	4	4	1	1	2	4	3	4
ENSG00000008441	342	318	346	355	155	165	170	162	242	255	261	234	201	217	204	203	353	346	359	329	158	150	140	146	343	338	335	334	171	167	194	185	333	379	366	376	170	194	167	176	303	267	319	278	155	158	169	176
ENSG00000008513	486	525	532	542	497	460	444	451	349	357	367	359	440	479	424	441	374	434	434	418	351	305	359	313	523	535	587	531	346	365	353	373	649	622	627	586	562	601	615	578	374	396	374	359	502	533	490	579
ENSG00000008516	11	9	4	3	10	13	13	10	10	7	11	6	9	9	7	12	5	9	8	6	15	9	13	11	12	5	10	11	6	7	9	3	17	5	8	4	14	10	13	18	10	11	20	17	12	10	17	8
ENSG00000008517	0	0	0	0	0	0	0	0	0	0	0	0	0	0	0	0	0	0	0	0	0	0	1	0	0	1	0	0	0	0	0	0	1	0	0	0	0	0	0	0	0	0	0	0	0	0	0	0
ENSG00000008710	1007	994	1013	989	798	835	768	809	838	748	783	759	842	814	832	786	724	761	744	696	650	649	648	677	1123	1071	1091	1062	766	773	755	800	1112	1096	1091	1158	890	782	846	823	956	970	971	959	822	824	855	809
ENSG00000008735	22	25	24	20	28	38	33	34	24	24	24	17	31	40	29	42	17	18	29	25	23	27	34	38	36	21	32	31	25	20	36	30	21	38	27	30	40	39	31	46	36	26	38	28	32	25	29	32
ENSG00000008838	448	441	397	396	461	525	465	489	375	339	373	351	503	494	472	495	456	468	497	472	450	424	478	412	406	413	368	376	404	381	446	442	470	462	528	451	505	509	511	495	446	389	411	456	464	412	433	405
ENSG00000008853	13	17	17	15	22	23	22	32	16	17	18	9	17	30	25	24	14	12	18	14	13	25	26	23	25	33	24	30	23	21	20	24	18	15	17	23	44	29	42	29	27	30	21	22	21	28	10	23
ENSG00000008869	312	281	272	314	320	308	304	274	246	230	233	214	275	292	250	264	171	182	214	196	220	222	193	224	337	321	341	360	207	198	183	198	337	332	292	336	328	312	285	316	257	263	269	263	241	244	254	248
ENSG00000008952	397	347	446	371	355	396	376	340	288	290	274	328	316	325	337	339	314	310	288	294	253	274	300	277	402	332	396	360	307	312	284	315	364	412	400	384	399	349	350	352	302	304	279	302	321	339	316	316
ENSG00000008988	3377	3469	3513	3351	3287	3235	3175	3152	2555	2536	2528	2518	2907	2985	2956	3000	4172	4131	4079	4076	2590	2626	2704	2635	3518	3402	3409	3511	3531	3405	3457	3402	3918	3835	3905	3791	3401	3326	3376	3396	3173	3267	3390	3196	2927	2927	2907	3009
ENSG00000009307	3363	3299	3374	3347	3156	3021	3089	2933	2815	2731	2845	2672	3009	2958	3036	2871	2917	3089	3064	2990	2333	2284	2327	2356	3592	3526	3633	3552	2461	2504	2426	2403	3635	3666	3711	3636	2962	3057	2938	2946	3017	2787	2917	2829	2420	2414	2503	2434
ENSG00000009335	493	486	481	495	580	555	612	584	462	402	470	431	563	567	565	507	456	423	402	395	429	424	391	387	551	531	528	537	357	377	363	371	510	529	576	562	546	533	530	492	428	435	442	468	430	464	455	452
ENSG00000009413	341	345	351	355	274	241	273	246	264	268	262	268	312	282	328	289	153	162	148	169	183	182	209	165	373	342	294	371	164	165	161	144	337	323	336	342	235	248	263	262	246	281	240	244	260	288	278	250
ENSG00000009694	1	0	1	0	0	1	0	0	0	1	0	1	0	0	1	0	0	0	0	0	0	0	1	0	0	0	0	0	0	0	0	0	0	0	0	0	0	0	0	0	1	0	0	0	0	0	0	1
ENSG00000009709	0	0	0	0	0	0	0	0	0	0	0	0	0	0	0	0	0	0	0	0	0	0	0	0	0	0	0	0	0	0	0	0	0	0	0	0	0	0	0	0	0	0	0	0	0	0	0	0
ENSG00000009724	11	16	11	7	33	31	28	32	19	21	25	15	47	39	47	48	17	27	21	25	36	32	36	26	21	19	16	15	20	25	22	22	17	23	17	19	29	18	36	29	25	16	18	19	23	22	25	28
ENSG00000009765	0	0	0	0	0	0	0	0	0	0	0	0	0	0	0	1	1	3	0	3	0	0	1	2	2	0	0	0	0	0	2	0	1	1	1	0	2	1	0	2	0	1	0	1	0	0	1	1
ENSG00000009780	58	53	50	48	72	65	64	66	41	30	42	41	41	51	61	47	31	44	45	39	31	30	43	28	59	54	52	54	62	40	43	45	54	49	59	55	56	54	70	66	58	41	47	48	44	45	45	48
ENSG00000009790	13	27	20	17	45	39	44	46	20	24	18	14	33	27	35	35	24	17	31	15	27	32	29	29	14	17	16	21	29	24	22	22	22	29	22	27	60	65	57	70	18	16	14	14	40	40	34	24
ENSG00000009830	98	86	116	127	105	106	94	91	87	101	83	78	123	104	120	110	118	108	108	128	106	77	101	92	111	103	106	104	89	81	74	88	144	138	119	115	117	104	112	95	106	95	113	118	93	88	100	72
ENSG00000009844	348	342	360	340	301	334	330	341	258	321	274	284	315	252	289	269	310	260	277	302	216	216	227	196	327	351	376	357	336	282	282	292	365	374	388	340	311	293	324	270	297	290	302	277	248	234	244	205
ENSG00000009950	1	1	0	0	0	0	1	0	0	0	0	0	3	0	0	2	0	0	0	2	0	0	0	0	0	1	1	0	0	0	2	0	0	0	2	1	0	2	0	0	2	1	0	2	0	0	0	4
ENSG00000009954	1930	1811	1929	1832	1474	1475	1496	1554	1633	1523	1552	1486	1659	1555	1606	1579	1561	1561	1524	1548	1058	1057	1059	1079	1771	1706	1799	1735	1328	1307	1277	1229	1893	1965	1824	1854	1460	1373	1361	1418	1668	1584	1611	1620	1413	1271	1275	1279
ENSG00000010017	563	574	507	600	430	476	407	411	443	440	509	492	466	459	495	463	456	448	449	442	304	294	319	358	676	659	645	646	399	394	446	384	634	607	562	547	411	388	409	422	534	518	485	519	400	353	424	380
ENSG00000010030	18	20	21	15	10	8	10	9	19	18	17	8	8	11	9	11	18	27	26	19	8	5	8	10	28	18	21	18	9	11	8	10	18	21	20	17	6	2	10	5	15	18	12	29	6	9	15	13
ENSG00000010072	81	72	65	82	81	75	80	70	76	61	68	49	73	74	70	66	54	38	56	58	52	48	45	38	100	95	95	88	47	37	45	51	94	85	89	71	63	75	65	73	79	60	61	63	79	85	88	73
ENSG00000010165	330	349	332	327	334	327	318	317	254	245	245	241	302	292	249	299	293	287	303	334	211	252	245	238	270	311	316	268	276	235	295	277	323	345	365	348	338	346	335	307	284	295	310	279	254	262	257	263
ENSG00000010219	17	23	18	21	22	24	25	26	15	6	14	11	22	16	16	14	13	17	14	24	12	30	15	11	14	12	16	18	10	12	8	18	20	24	17	23	23	36	27	32	14	21	10	14	15	17	20	12
ENSG00000010244	1033	1023	1001	1037	1197	1190	1134	1108	862	836	935	864	1112	1054	1102	1083	964	881	975	979	927	889	900	854	1021	1034	1047	1029	874	864	813	811	1101	1176	1213	1141	1046	1036	1060	1005	1019	1003	1055	1044	899	909	932	909
ENSG00000010256	915	905	937	899	866	821	839	837	662	632	717	652	785	768	729	721	1077	1103	984	1090	698	694	740	753	747	664	789	765	906	844	865	880	998	1003	969	1064	810	824	815	818	829	791	781	789	642	695	664	632
ENSG00000010270	93	105	97	89	96	84	84	95	68	62	72	72	68	70	73	71	88	79	68	66	54	60	68	54	112	101	102	109	85	62	83	80	109	114	87	94	85	83	69	72	81	76	96	86	55	54	80	74
ENSG00000010278	1716	1707	1679	1735	375	372	399	339	1132	1100	1159	1153	440	464	439	418	1704	1664	1796	1731	275	279	284	284	1312	1262	1259	1310	526	472	480	533	1761	1786	1812	1753	468	449	487	473	1359	1320	1284	1291	450	395	410	430
ENSG00000010282	0	0	0	0	0	0	0	0	0	0	0	0	0	0	0	0	0	0	0	0	0	0	0	0	0	0	0	0	0	0	0	0	0	0	0	0	0	0	0	0	0	0	0	0	0	0	0	0
ENSG00000010292	2211	2253	2265	2230	1692	1567	1653	1588	1827	1764	1789	1733	1987	2074	2106	1994	2132	2060	2076	2035	1364	1333	1384	1315	1765	1702	1777	1770	1823	1753	1818	1745	2646	2395	2581	2410	1604	1650	1615	1592	2041	1952	2035	2051	1598	1618	1663	1591
ENSG00000010295	169	166	153	183	163	191	186	181	154	131	142	149	157	155	151	144	152	168	172	152	121	146	133	124	211	197	242	224	159	145	144	138	210	214	194	207	200	184	226	179	176	169	162	176	169	184	149	157
ENSG00000010310	2	2	4	5	7	3	1	2	6	4	2	3	2	5	2	4	5	3	6	4	1	2	2	2	3	5	2	1	1	3	3	2	8	8	6	5	5	3	5	4	5	7	4	3	5	0	7	4
ENSG00000010318	85	93	78	95	68	54	59	40	73	62	64	70	91	84	85	80	45	37	37	50	52	56	54	37	74	79	72	78	68	80	63	73	103	92	94	98	41	61	67	54	63	61	77	61	68	70	56	65
ENSG00000010319	17	7	16	12	114	117	120	101	17	10	10	9	68	58	67	60	10	6	9	10	104	91	95	92	13	7	13	6	27	49	30	32	13	16	9	16	139	138	137	150	9	9	12	16	75	60	60	77
ENSG00000010322	601	537	588	569	1486	1474	1488	1527	455	424	431	447	967	961	934	1019	562	557	518	512	1263	1181	1218	1267	574	571	543	551	774	748	836	780	651	678	646	660	1769	1758	1853	1787	594	530	621	571	934	950	964	932
ENSG00000010327	1	2	1	0	683	707	701	704	2	0	1	0	307	296	281	292	3	1	0	1	694	704	711	668	0	0	0	1	214	199	228	225	1	2	2	1	1154	1093	1197	1152	4	2	3	2	345	345	361	335
ENSG00000010361	105	104	115	111	86	72	72	72	79	72	101	57	70	73	76	81	102	127	118	125	74	50	69	69	90	79	82	92	97	98	95	85	127	113	115	116	85	89	95	72	87	91	100	97	63	65	84	54
ENSG00000010379	1	2	0	0	0	0	1	0	0	0	0	0	1	0	0	0	0	0	0	0	0	0	1	0	0	1	0	1	0	0	0	0	1	1	0	1	0	0	0	0	0	1	0	1	0	0	0	0
ENSG00000010404	241	264	242	230	268	270	280	255	215	205	214	206	255	247	236	262	190	191	191	193	236	182	211	229	333	327	310	326	201	196	183	215	257	227	251	278	315	303	311	308	224	213	240	217	232	242	210	218
ENSG00000010438	0	0	0	0	0	0	0	0	0	1	2	2	0	0	0	0	0	1	1	0	0	0	0	0	1	0	0	0	0	1	0	0	0	0	0	0	0	0	0	0	0	0	0	0	0	0	0	0
ENSG00000010539	138	136	130	122	89	102	94	84	91	88	95	98	100	79	75	87	62	61	80	75	49	38	49	60	109	109	117	98	74	78	61	84	148	146	141	119	98	99	94	112	78	77	71	86	107	130	133	97
ENSG00000010610	0	0	0	0	0	0	0	0	0	0	0	0	0	0	0	0	0	0	0	0	0	0	0	0	0	0	0	0	0	0	0	0	0	0	0	0	0	0	0	0	0	0	0	0	0	0	0	0
ENSG00000010626	40	32	32	38	38	30	36	29	27	28	32	32	36	32	34	36	50	51	38	37	29	31	29	22	55	41	27	26	26	32	33	22	47	47	57	44	33	36	31	44	41	30	44	32	26	26	23	26
ENSG00000010671	443	406	401	427	460	431	496	450	369	362	366	379	432	448	409	394	441	459	440	416	347	332	347	363	459	411	460	415	355	349	342	334	567	568	510	531	535	485	501	522	436	382	399	398	348	319	340	339
ENSG00000010704	14	23	19	19	18	23	14	19	15	12	11	21	17	21	16	14	22	16	10	15	15	9	15	12	19	23	22	16	26	11	22	21	19	31	30	31	22	17	18	19	24	22	21	20	18	17	18	15
ENSG00000010803	217	212	192	185	176	162	170	151	154	166	165	178	238	226	239	210	188	191	211	212	149	136	159	156	140	150	169	117	172	173	165	161	232	208	204	217	171	155	214	164	182	162	191	157	173	179	164	149
ENSG00000010810	374	411	400	375	161	155	180	164	315	283	281	309	203	197	195	183	417	442	421	364	149	159	140	150	539	518	540	550	235	236	222	210	471	485	470	506	198	235	241	222	392	404	421	363	193	164	162	163
ENSG00000010818	1073	1080	1073	1078	654	583	555	579	872	854	902	860	746	747	779	680	608	577	593	610	378	422	383	417	972	977	952	924	464	443	393	465	1062	1049	1047	1063	644	646	702	679	823	767	731	800	636	618	611	656
ENSG00000010932	0	0	0	0	0	0	0	1	0	0	0	0	0	0	0	1	1	0	0	0	1	0	0	0	0	0	0	0	0	0	0	0	1	0	1	0	0	0	0	0	0	0	1	0	1	0	1	1
ENSG00000011007	341	323	335	319	428	410	395	385	281	266	292	302	346	358	356	375	300	316	324	348	292	316	311	317	361	343	326	337	297	265	276	269	342	305	310	317	431	403	382	393	294	329	331	330	341	312	329	266
ENSG00000011009	226	215	233	219	241	231	259	244	154	168	171	170	243	235	234	240	283	252	278	281	234	259	217	206	237	229	229	251	279	222	218	247	250	259	251	240	266	258	268	258	253	230	279	217	202	237	213	216
ENSG00000011021	305	309	287	296	146	169	182	175	228	219	249	244	174	228	216	188	242	263	291	272	151	186	174	180	282	319	299	299	119	147	144	139	354	369	340	341	208	209	210	194	287	322	288	286	150	177	152	187
ENSG00000011028	206	206	238	193	324	307	356	346	183	183	207	186	273	260	270	253	267	227	225	220	351	334	338	316	267	270	252	303	269	213	250	261	323	303	328	287	438	461	427	439	278	223	268	239	316	328	367	356
ENSG00000011052	1	1	0	3	1	0	5	2	3	2	3	1	4	3	0	4	2	2	5	3	1	3	2	0	0	1	1	2	2	1	0	2	0	0	2	3	0	1	3	2	2	3	1	6	0	1	1	0
ENSG00000011083	0	0	0	0	0	0	0	0	0	0	0	0	0	0	0	0	0	0	0	0	0	0	0	0	0	0	0	0	0	0	0	0	0	0	0	0	0	1	0	0	0	0	0	0	0	0	0	0
ENSG00000011105	6	1	2	0	0	3	2	1	3	3	0	1	1	1	2	0	5	5	5	6	2	3	7	5	2	0	2	2	2	0	1	2	3	2	8	4	5	4	6	7	2	4	2	0	3	1	1	0
ENSG00000011114	239	229	248	260	252	228	267	238	211	202	212	202	232	212	220	235	144	157	127	120	167	182	162	168	230	267	242	254	139	140	147	165	264	241	223	234	238	240	259	225	188	189	194	185	205	245	223	237
ENSG00000011132	102	87	96	76	98	104	100	92	73	62	68	67	74	78	88	77	71	62	71	73	73	75	65	69	98	92	94	101	102	85	94	92	98	77	109	117	112	110	121	98	79	82	74	81	85	76	66	93
ENSG00000011143	100	95	104	102	83	87	84	82	84	65	62	62	91	89	75	79	114	118	106	124	64	68	57	50	78	107	101	112	74	64	67	78	111	122	131	126	97	66	86	91	83	64	99	87	72	92	77	70
ENSG00000011198	68	52	52	38	43	41	51	38	36	35	42	31	36	34	41	36	40	28	38	41	24	21	21	32	67	78	71	64	24	33	28	29	46	58	34	36	33	38	30	36	42	47	51	41	34	33	28	37
ENSG00000011201	0	0	0	0	0	0	0	0	0	0	0	0	0	0	0	0	0	0	0	0	0	0	0	0	0	0	0	0	0	0	0	0	0	0	0	0	0	0	0	0	0	0	0	0	0	0	0	0
ENSG00000011243	262	275	277	290	315	345	321	322	236	228	243	249	284	290	289	256	375	333	341	374	271	328	262	309	395	355	355	406	281	285	273	250	345	328	362	323	349	311	321	316	368	333	328	346	278	280	282	307
ENSG00000011258	398	387	376	366	278	255	259	261	313	323	341	346	309	284	289	318	237	255	232	227	186	183	177	188	398	420	407	392	240	235	212	205	390	460	413	411	271	264	285	239	285	296	333	302	242	251	241	236
ENSG00000011260	429	443	420	411	433	410	425	395	323	340	301	333	411	429	378	354	327	352	382	379	275	262	255	254	386	366	346	392	356	355	365	346	417	453	399	429	299	334	332	332	321	360	342	350	298	296	307	275
ENSG00000011275	178	157	167	149	142	177	182	152	134	148	154	146	169	162	175	167	156	149	145	159	141	156	156	142	200	228	231	214	151	155	165	153	190	196	184	187	191	205	182	187	167	187	182	196	124	147	167	156
ENSG00000011295	366	379	397	386	427	401	384	405	349	358	326	311	374	364	359	403	411	332	366	355	305	303	270	318	422	434	411	426	300	323	313	297	461	415	433	439	426	376	409	379	401	362	326	364	297	311	316	317
ENSG00000011304	3209	3043	3144	3091	2862	2730	2702	2720	2415	2380	2329	2392	2939	2937	2921	2909	2662	2686	2674	2568	2483	2398	2413	2384	2508	2659	2672	2565	2789	2799	2702	2709	3130	3024	3074	3146	2474	2483	2552	2468	2874	2940	2909	2876	2750	2617	2794	2721
ENSG00000011332	5	2	3	4	4	6	5	4	15	9	7	2	7	6	8	4	9	8	4	11	4	4	7	5	10	10	10	7	7	2	7	4	7	7	4	7	5	8	3	6	9	4	6	9	5	10	2	3
ENSG00000011347	0	0	0	0	0	0	0	0	0	0	0	0	0	0	0	0	0	0	0	0	0	0	0	0	0	0	0	0	0	0	0	0	0	0	0	0	0	0	0	0	0	0	0	0	0	0	0	0
ENSG00000011376	165	146	143	176	157	195	155	176	124	128	139	134	169	142	164	161	172	154	169	148	142	152	146	132	155	153	151	157	123	131	131	141	166	163	167	157	156	180	162	182	153	161	141	157	145	121	143	145
ENSG00000011405	264	300	288	292	199	202	199	187	205	212	202	213	249	200	222	220	120	114	119	99	141	134	133	159	239	233	226	252	101	112	106	107	295	260	254	283	218	213	211	231	172	201	190	203	193	162	147	163
ENSG00000011422	341	302	374	321	166	149	148	159	257	287	260	242	141	146	151	176	448	465	485	441	97	119	120	125	236	275	223	278	137	152	136	130	434	468	470	439	194	196	197	195	370	367	373	365	136	135	155	124
ENSG00000011426	208	230	256	280	154	145	165	150	198	201	149	219	149	158	170	134	139	150	122	163	114	102	94	75	234	212	228	223	126	121	130	117	261	253	243	239	143	148	121	137	195	172	189	198	179	191	167	166
ENSG00000011451	375	362	430	382	485	458	456	510	329	317	331	345	436	416	395	397	319	310	318	307	433	418	395	415	368	351	368	348	368	407	412	397	433	418	438	407	509	486	452	496	356	381	377	382	402	411	417	377
ENSG00000011454	274	295	313	278	290	281	252	279	227	209	239	250	254	213	286	258	260	235	242	216	190	190	206	175	327	318	313	312	179	231	211	188	309	330	343	330	266	246	294	261	268	267	284	250	231	216	229	221
ENSG00000011465	0	0	0	0	0	0	0	0	0	0	0	0	1	0	0	0	0	0	0	0	0	0	0	0	0	0	0	0	0	0	0	0	1	0	0	0	0	0	0	0	0	0	0	0	0	0	0	0
ENSG00000011478	182	195	188	177	157	140	148	166	139	146	154	140	150	153	157	155	214	173	170	174	129	131	118	136	190	199	214	208	177	171	149	193	202	220	205	185	178	161	160	164	166	184	202	193	140	131	144	140
ENSG00000011485	647	632	677	624	603	584	611	646	523	533	553	504	653	676	641	643	683	688	703	703	521	491	478	528	572	594	545	543	605	594	654	583	701	667	708	732	602	609	597	595	673	694	622	635	605	578	580	564
ENSG00000011523	344	295	272	301	222	183	184	196	242	232	270	249	172	192	171	198	222	209	193	205	161	136	143	149	367	347	367	331	155	160	178	159	316	320	322	328	209	209	219	225	238	276	254	243	172	177	185	156
ENSG00000011566	99	89	83	103	98	83	89	73	88	67	92	78	104	99	80	94	64	61	59	64	75	67	70	81	111	137	110	136	54	53	52	61	107	97	112	103	102	97	94	86	87	71	68	73	70	69	80	72
ENSG00000011590	4	2	5	5	5	2	2	2	2	2	6	9	4	3	2	1	1	3	2	0	1	4	6	4	6	5	5	5	1	6	1	2	3	4	7	2	5	2	3	5	3	8	5	4	1	2	1	1
ENSG00000011600	0	0	0	0	0	0	0	0	0	0	0	0	0	0	0	0	0	0	0	0	0	0	0	0	0	0	0	0	0	0	0	0	0	0	0	0	1	0	0	0	0	0	0	0	0	0	0	0
ENSG00000011638	138	121	134	136	66	61	69	71	86	90	94	99	70	81	84	68	123	134	140	127	59	53	65	78	216	222	217	209	94	81	75	82	168	162	155	156	95	109	64	93	152	139	133	137	64	78	76	62
ENSG00000011677	7	5	13	9	0	0	1	1	5	8	10	7	2	1	1	0	10	6	9	12	2	4	1	0	7	6	8	10	0	1	0	0	12	7	11	7	2	1	0	0	9	6	10	13	1	1	0	2
ENSG00000012048	687	668	678	719	395	406	410	379	501	542	554	555	581	549	570	571	540	511	529	498	317	307	305	312	479	474	534	489	488	433	418	455	725	702	708	767	392	363	398	414	640	620	636	583	459	445	457	451
ENSG00000012061	317	307	314	302	288	295	271	296	217	198	240	226	293	288	311	281	354	351	382	348	273	260	265	260	285	308	351	304	280	270	308	311	358	362	326	351	320	308	340	316	305	310	316	271	256	251	259	247
ENSG00000012124	1344	1340	1327	1340	1115	1152	1147	1116	1071	1094	1111	1062	1800	1734	1779	1711	1463	1419	1415	1396	1061	1079	1097	1057	982	1011	1022	977	1465	1445	1487	1504	1494	1425	1516	1569	1339	1334	1323	1317	1283	1235	1297	1315	1505	1446	1430	1510
ENSG00000012171	8	11	13	13	19	24	21	16	9	17	13	12	17	20	16	13	20	24	17	17	17	14	16	20	22	33	26	39	21	19	22	10	26	13	18	33	31	15	23	25	25	18	15	17	17	14	19	20
ENSG00000012174	109	86	112	93	126	84	105	109	79	86	95	107	93	98	92	95	54	68	71	58	86	68	90	89	100	119	101	115	75	91	85	70	128	101	95	115	113	101	110	114	107	92	81	106	84	97	85	76
ENSG00000012211	88	75	89	85	49	50	55	55	38	46	50	55	59	60	47	46	60	44	58	59	36	49	40	41	72	72	63	48	90	74	66	78	72	93	84	84	63	75	74	78	72	66	66	59	41	44	45	44
ENSG00000012223	0	0	0	0	1	0	0	0	0	0	0	0	0	0	0	0	0	0	0	0	0	0	0	0	0	0	0	0	0	0	0	0	0	0	0	0	0	0	0	0	0	0	0	0	0	1	0	0
ENSG00000012232	259	238	215	226	230	185	179	193	197	185	171	192	198	216	191	187	211	218	222	208	169	139	157	186	310	266	263	265	173	141	165	173	219	264	245	235	201	213	243	240	206	205	202	225	206	161	163	199
ENSG00000012504	0	0	0	0	0	0	0	0	0	0	0	0	0	0	0	0	0	0	0	0	0	0	0	0	0	0	0	0	0	0	0	0	0	0	0	0	0	0	0	0	0	0	0	0	0	0	0	0
ENSG00000012660	1105	1133	1127	1173	751	693	685	685	907	893	911	922	794	813	745	807	928	947	943	978	540	545	532	514	1134	1216	1099	1190	677	636	725	675	1213	1188	1226	1254	721	741	716	709	1006	1000	962	987	573	587	665	588
ENSG00000012779	2	4	2	4	6	7	9	5	1	4	2	2	5	5	4	2	1	2	2	1	6	5	7	7	3	1	2	3	4	3	0	1	3	0	1	2	4	4	6	4	2	3	3	1	4	9	5	1
ENSG00000012817	0	0	0	0	0	0	0	0	0	0	0	1	0	0	0	0	0	0	0	0	0	0	0	0	0	0	0	0	0	0	0	0	0	0	0	0	0	0	0	0	0	0	0	0	0	0	0	0
ENSG00000012822	174	200	179	175	216	199	250	234	176	167	161	187	234	204	225	191	218	226	245	226	165	196	205	211	288	286	272	276	204	239	234	214	271	268	275	266	328	328	357	326	198	216	216	221	181	200	196	202
ENSG00000012963	496	504	503	490	566	504	518	532	422	382	366	362	494	462	508	496	411	397	417	384	401	393	409	374	440	485	458	447	404	425	405	423	570	552	550	541	551	507	461	536	412	406	467	450	450	385	429	402
ENSG00000012983	183	221	205	205	164	199	158	153	203	206	173	188	147	157	145	134	156	181	153	182	109	108	101	113	266	247	253	240	86	91	86	120	243	257	216	265	166	149	176	179	217	221	192	206	147	118	116	102
ENSG00000013016	0	0	0	0	0	0	0	0	0	0	0	0	0	1	0	0	0	0	0	0	0	0	0	0	0	0	0	0	0	0	0	0	0	0	0	0	0	1	0	0	0	0	1	0	0	0	0	0
ENSG00000013275	296	309	299	308	374	358	331	363	240	248	241	252	330	352	323	350	366	341	338	353	291	284	316	297	329	301	326	317	287	307	296	319	315	363	342	339	355	358	323	362	365	334	331	309	289	319	273	284
ENSG00000013288	187	188	171	172	237	231	272	219	146	137	148	133	189	222	238	191	158	164	165	156	208	185	216	193	252	224	216	195	181	150	178	160	195	182	195	185	246	266	265	287	192	198	206	183	182	191	191	208
ENSG00000013293	0	1	1	1	1	0	0	2	1	0	1	0	1	1	0	1	1	1	0	0	1	0	2	1	0	0	0	0	0	0	1	0	0	1	1	0	1	0	0	0	0	2	0	1	0	1	1	1
ENSG00000013297	5	2	0	3	5	2	1	3	3	2	1	0	4	4	2	8	4	4	2	0	5	5	3	6	6	5	3	1	1	3	1	2	3	4	6	4	3	2	3	3	2	3	5	2	6	3	5	3
ENSG00000013306	445	448	453	386	589	534	587	563	376	349	346	352	514	522	523	484	572	568	475	500	481	543	544	502	404	465	454	446	503	521	523	475	500	502	520	520	516	533	554	574	470	417	447	459	499	433	496	493
ENSG00000013364	35	28	42	43	122	127	127	117	20	21	19	26	68	64	64	64	35	45	43	35	100	100	117	99	38	58	53	46	59	80	68	61	46	50	29	41	136	129	136	148	35	36	37	24	91	75	79	80
ENSG00000013374	400	400	393	383	324	339	357	361	305	357	309	310	368	329	349	312	410	429	390	431	276	285	301	289	435	410	411	443	344	310	324	328	511	475	427	477	350	365	366	360	378	379	383	327	273	301	297	273
ENSG00000013375	102	133	135	134	83	76	77	72	86	95	89	100	82	83	79	86	76	87	76	81	41	53	65	56	133	108	117	135	61	67	59	81	136	140	122	131	93	92	76	95	88	104	77	92	77	86	82	76
ENSG00000013392	16	24	26	22	16	17	13	13	13	18	5	11	19	21	12	12	13	16	15	20	8	9	12	7	17	15	19	16	10	10	16	11	20	11	17	17	22	20	16	24	11	15	20	8	12	8	11	21
ENSG00000013441	329	364	333	310	376	368	378	378	211	185	195	199	312	302	312	292	296	281	257	296	255	250	220	215	210	249	220	246	218	185	237	231	328	289	308	315	313	316	309	263	316	339	344	318	361	360	401	369
ENSG00000013503	103	112	105	116	119	121	102	122	86	97	75	93	110	101	82	92	80	94	73	89	87	89	70	62	107	108	128	110	79	69	81	91	106	122	111	116	95	106	112	112	91	76	94	87	101	89	102	91
ENSG00000013523	155	161	161	153	187	175	161	150	153	129	171	152	143	147	157	147	135	120	137	161	147	123	136	120	161	184	214	175	115	99	124	116	167	157	183	181	177	164	172	180	175	169	161	157	124	112	103	100
ENSG00000013561	117	153	141	137	156	179	178	165	109	89	87	90	117	114	115	143	130	105	114	111	130	121	106	126	188	180	185	170	119	96	104	89	156	154	160	172	161	168	169	161	132	138	142	122	108	124	99	100
ENSG00000013563	35	46	35	34	41	67	48	32	28	26	25	19	54	45	52	54	34	30	28	37	48	63	42	44	38	30	38	37	42	57	54	49	40	36	38	38	75	65	65	70	39	22	33	27	46	34	47	55
ENSG00000013573	543	548	524	585	508	502	502	528	506	512	511	512	741	734	705	697	690	674	714	697	485	484	480	466	498	506	461	423	581	579	614	547	713	652	724	684	517	551	566	525	663	664	576	604	605	628	664	619
ENSG00000013583	69	59	81	52	68	68	81	79	51	39	35	51	71	67	68	72	62	74	53	52	53	49	58	60	71	88	75	79	72	55	55	61	73	73	74	75	55	68	69	77	76	68	62	60	62	66	54	58
ENSG00000013588	2	0	1	1	0	2	0	1	0	0	0	0	0	2	1	2	0	0	0	0	0	0	0	0	0	0	0	0	0	0	0	0	1	0	0	2	2	2	1	2	1	1	0	1	1	0	0	0
ENSG00000013619	2	7	3	4	4	5	2	5	3	6	5	4	8	4	8	6	2	3	7	4	2	5	3	1	11	9	10	5	4	5	3	7	7	4	6	8	4	1	5	2	6	2	4	3	6	5	1	4
ENSG00000013725	1	2	3	0	4	1	2	0	1	0	0	1	2	5	3	4	0	0	2	0	0	1	4	0	0	1	1	2	2	3	4	4	1	1	3	1	4	2	4	3	0	2	3	1	4	3	6	4
ENSG00000013810	960	844	854	910	807	821	850	817	747	684	697	670	959	918	942	951	1021	916	926	977	711	755	731	733	769	769	749	767	893	866	902	896	995	1046	1038	998	788	748	739	763	900	833	807	869	819	861	838	841
ENSG00000014123	204	222	211	237	241	227	254	236	170	174	150	165	187	204	200	198	153	147	138	152	189	183	157	153	230	232	245	242	176	155	148	162	233	242	246	225	259	244	233	243	172	201	167	185	203	199	208	197
ENSG00000014138	353	321	318	328	276	241	280	255	263	272	260	270	315	329	350	337	354	379	369	372	200	221	218	218	247	231	257	269	295	286	270	290	351	365	363	343	230	224	270	233	342	329	317	298	233	249	271	267
ENSG00000014164	149	174	151	154	150	144	143	102	129	115	125	121	134	134	130	128	139	143	141	117	131	136	136	115	188	173	171	165	145	139	158	119	188	156	176	182	150	144	134	166	155	176	175	163	128	121	111	122
ENSG00000014216	705	655	685	674	979	1044	1002	992	517	551	499	467	1014	936	984	974	764	766	820	752	933	924	990	934	674	660	681	698	977	981	1035	1006	715	763	741	745	1102	1078	1139	1058	682	655	643	683	874	865	894	840
ENSG00000014257	0	0	1	4	0	0	0	0	3	0	0	0	1	0	1	0	1	0	2	2	0	0	0	0	1	2	0	1	0	0	0	0	1	2	2	3	0	0	0	0	1	0	1	0	0	0	0	0
ENSG00000014641	531	540	563	543	528	532	496	561	436	452	408	443	446	447	432	456	584	560	560	505	347	364	347	371	494	502	569	522	477	460	437	439	612	621	665	630	517	522	534	468	501	477	503	497	355	395	355	346
ENSG00000014824	262	272	236	236	296	287	302	296	245	210	203	191	226	224	245	202	220	203	229	193	191	195	195	167	289	291	270	272	193	211	187	199	311	250	293	275	251	212	219	269	230	214	227	221	210	197	176	203
ENSG00000014914	0	0	0	0	0	2	0	2	0	0	0	0	2	2	0	0	0	1	0	2	1	0	4	1	0	0	0	0	1	0	0	1	0	0	1	1	4	3	3	2	1	0	0	1	5	1	4	1
ENSG00000014919	305	310	330	316	301	314	289	304	247	264	263	224	245	269	251	303	247	250	290	241	223	206	207	248	318	268	301	288	254	237	236	241	331	322	308	352	310	268	293	280	251	252	295	293	228	254	235	218
ENSG00000015133	180	201	211	207	243	261	285	240	190	156	184	183	274	284	278	285	141	125	138	150	202	181	216	226	225	230	218	231	187	168	158	167	220	210	213	216	274	241	264	256	200	204	223	168	233	255	232	287
ENSG00000015153	91	97	92	104	101	114	97	96	77	55	76	76	74	83	85	95	103	78	76	92	79	83	71	69	94	95	87	96	59	84	70	67	97	100	96	92	87	80	93	86	75	85	78	83	65	58	72	71
ENSG00000015171	423	431	438	452	443	431	410	417	366	394	392	377	421	452	447	399	334	376	351	340	291	316	307	316	518	497	516	523	336	353	318	373	482	446	471	474	432	423	400	406	418	441	413	428	336	385	350	336
ENSG00000015285	368	381	383	420	469	457	412	455	277	300	319	288	461	456	508	468	424	446	444	428	435	442	444	448	384	333	382	369	516	512	469	501	423	412	379	435	521	524	540	549	411	374	340	384	449	439	421	429
ENSG00000015413	2	5	2	4	66	81	76	79	1	3	1	1	51	46	47	54	8	4	0	6	76	84	69	92	0	0	1	0	71	70	65	69	2	4	5	5	107	113	111	100	4	0	3	1	70	72	61	76
ENSG00000015475	203	195	206	203	185	242	224	238	181	162	138	171	241	249	242	235	190	197	163	195	187	190	184	170	176	200	204	195	249	269	252	272	219	227	212	206	240	248	225	223	188	161	219	195	201	203	208	205
ENSG00000015479	3101	2971	3035	3088	2710	2605	2690	2748	2448	2387	2450	2464	2710	2610	2573	2651	2874	2838	2786	2781	2065	1987	2012	1985	2796	2712	2727	2656	2170	2165	2216	2173	3306	3246	3371	3274	2289	2191	2295	2138	2639	2635	2627	2522	2102	2024	2107	2018
ENSG00000015520	0	1	0	0	0	0	0	0	0	0	0	0	2	1	0	0	1	0	0	0	0	0	0	0	0	2	2	1	0	0	0	0	1	0	1	0	1	1	0	0	0	0	1	0	1	1	1	0
ENSG00000015532	166	160	157	172	189	156	171	180	115	129	107	140	141	132	150	157	162	158	148	161	128	125	138	152	160	158	154	149	183	163	160	167	217	173	201	167	178	191	189	184	163	160	146	179	140	124	146	141
ENSG00000015568	5	2	0	0	3	2	6	2	0	2	0	0	2	3	0	2	0	0	2	1	6	5	2	0	5	0	2	1	3	5	1	3	2	1	2	2	6	4	0	0	4	3	1	1	3	5	2	3
ENSG00000015592	1	0	2	0	0	0	0	1	0	0	0	0	0	0	0	0	1	0	0	0	0	1	0	0	0	0	0	0	0	0	0	1	0	0	0	0	0	0	0	0	0	0	0	0	0	0	0	0
ENSG00000015676	222	213	201	208	171	190	172	171	172	177	163	167	210	162	182	161	228	241	241	238	132	155	144	158	194	170	190	203	169	152	145	137	229	209	262	236	189	187	194	198	192	165	191	186	163	149	138	155
ENSG00000016082	0	0	0	0	0	0	0	0	0	0	0	0	0	0	0	0	0	0	0	0	0	0	0	0	0	0	0	0	0	0	0	0	0	0	0	0	0	0	0	0	0	0	0	0	0	0	0	0
ENSG00000016391	1	1	4	2	4	0	3	3	1	1	3	0	2	1	1	5	0	2	0	1	2	0	3	1	2	1	4	2	4	1	1	2	1	3	1	2	3	1	4	2	3	0	3	2	3	1	1	3
ENSG00000016402	0	0	0	0	0	0	0	0	0	0	0	0	0	0	0	0	0	0	0	0	0	0	0	0	0	0	0	0	0	0	0	0	0	0	0	0	0	0	0	0	0	0	0	0	0	0	0	0
ENSG00000016490	0	0	0	0	0	0	0	0	0	0	0	0	0	0	0	0	0	0	0	0	0	0	0	0	0	0	0	0	0	0	0	0	0	0	0	0	0	0	0	0	0	0	0	0	0	0	0	0
ENSG00000016602	0	0	0	0	0	0	0	0	0	0	0	0	0	0	0	0	0	0	0	0	0	0	0	0	0	0	0	0	0	0	0	0	0	0	0	0	1	0	0	1	0	0	0	0	0	0	0	1
[truncated: 63,882 more rows]

## Sheet: SEM_AraC
ENSEMBL	SEM_39_L1	SEM_39_L2	SEM_39_L3	SEM_39_L4	SEM_40_L1	SEM_40_L2	SEM_40_L3	SEM_40_L4	SEM_41_L1	SEM_41_L2	SEM_41_L3	SEM_41_L4	SEM_42_L1	SEM_42_L2	SEM_42_L3	SEM_42_L4	SEM_44_L1	SEM_44_L2	SEM_44_L3	SEM_44_L4	SEM_45_L1	SEM_45_L2	SEM_45_L3	SEM_45_L4	SEM_46_L1	SEM_46_L2	SEM_46_L3	SEM_46_L4	SEM_47_L1	SEM_47_L2	SEM_47_L3	SEM_47_L4	SEM_49_L1	SEM_49_L2	SEM_49_L3	SEM_49_L4	SEM_50_L1	SEM_50_L2	SEM_50_L3	SEM_50_L4	SEM_51_L1	SEM_51_L2	SEM_51_L3	SEM_51_L4	SEM_52_L1	SEM_52_L2	SEM_52_L3	SEM_52_L4
[truncated: 64,258 more rows]

[truncated: 1 more sheets: SEM_Dexa]
